# Supplementary material
Source: MDPI journal article supplement (https://www.mdpi.com/2079-6447/1/2/13)
Supplement: s1 [file s1]

Archive with 2 entries (2 files):
- Supplementary_1_Figures_S1-S6.pdf
- Supplementary_2_raw_spectral_data.xlsx
