# Supplementary material
Source: MDPI journal article supplement (https://www.mdpi.com/2079-6447/1/2/13)
Supplement: s1 [file s1 › Supplementary_1_Figures_S1-S6.pdf]

## Supplementary Data 1: Figures S1-S6

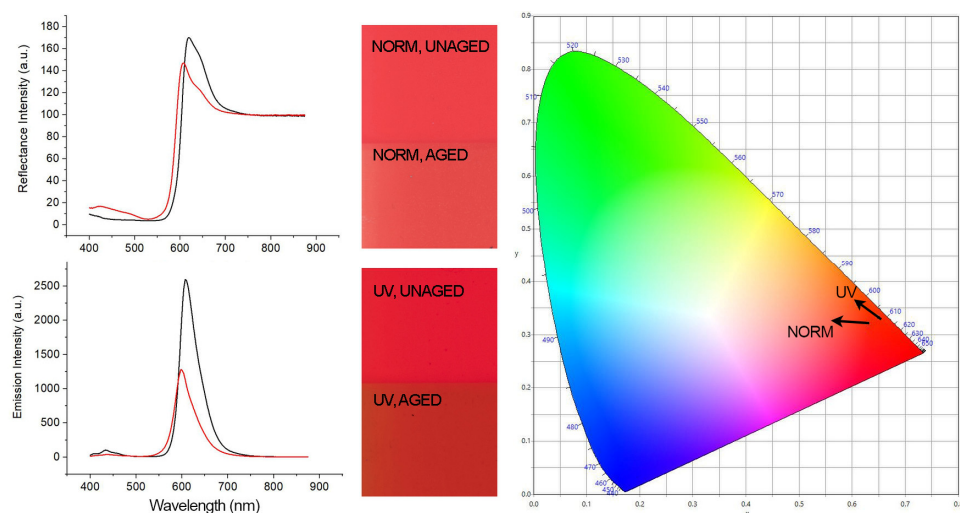

**Figure S1.** Left: Spectra of Kremer Brick Red unaged (black line) and aged (red line) showing a change a visible induced spectral shift and UV-induced ( $\lambda$  exc. =365 nm) spectral shift. Center: Corresponding images of the samples realized using RGB imaging system as described in the imaging section. Right: CIE 1931 (x,y) color space chromaticity diagram detailing the visual color changes indicated by direction of arrows.

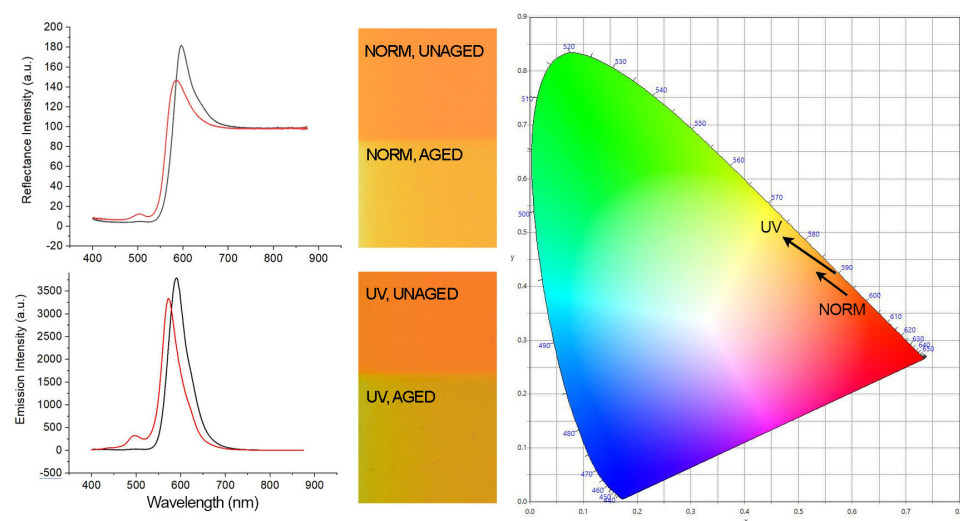

**Figure S2.** Left: Spectra of Kremer Golden Orange unaged (black line) and aged (red line) showing a change a visible induced spectral shift and UV-induced ( $\lambda$  exc. =365 nm) spectral shift. Center: Corresponding images of the samples realized using RGB imaging system as described in the imaging section. Right: CIE 1931 (x,y) color space chromaticity diagram detailing the visual color changes indicated by direction of arrows.

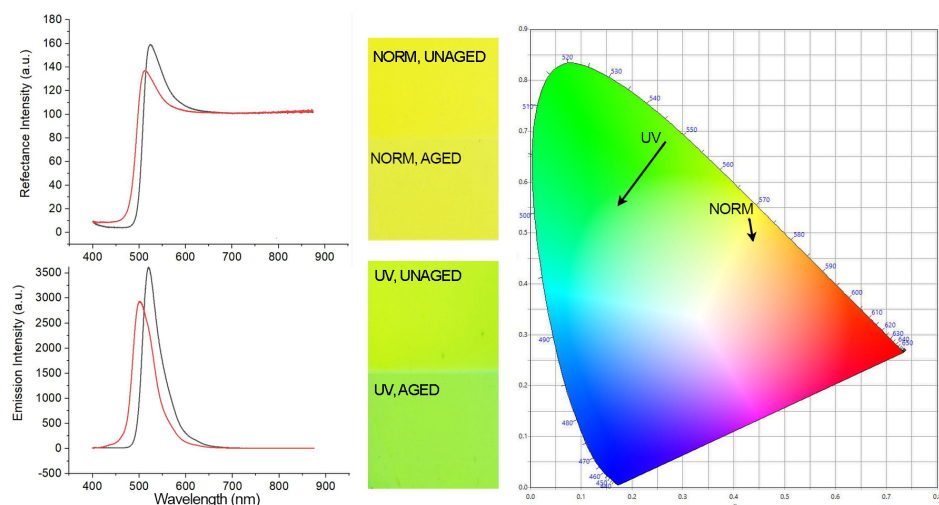

**Figure S3.** Left: Spectra of Kremer Yellow unaged (black line) and aged (red line) showing a change a visible induced spectral shift and UV-induced ( $\lambda$  exc. =365 nm) spectral shift. Center: Corresponding images of the samples realized using RGB imaging system as described in the imaging section. Right: CIE 1931 (x,y) color space chromaticity diagram detailing the visual color changes indicated by direction of arrows.

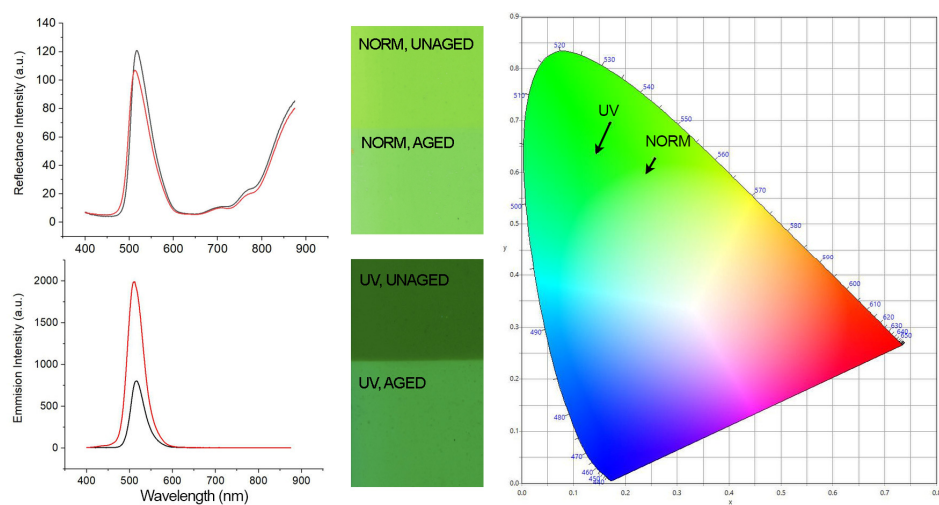

**Figure S4.** Left: Spectra of Kremer Green unaged (black line) and aged (red line) showing a change a visible induced spectral shift and UV-induced ( $\lambda$  exc. =365 nm) spectral shift. Center: Corresponding images of the samples realized using RGB imaging system as described in the imaging section. Right: CIE 1931 (x,y) color space chromaticity diagram detailing the visual color changes indicated by direction of arrows.

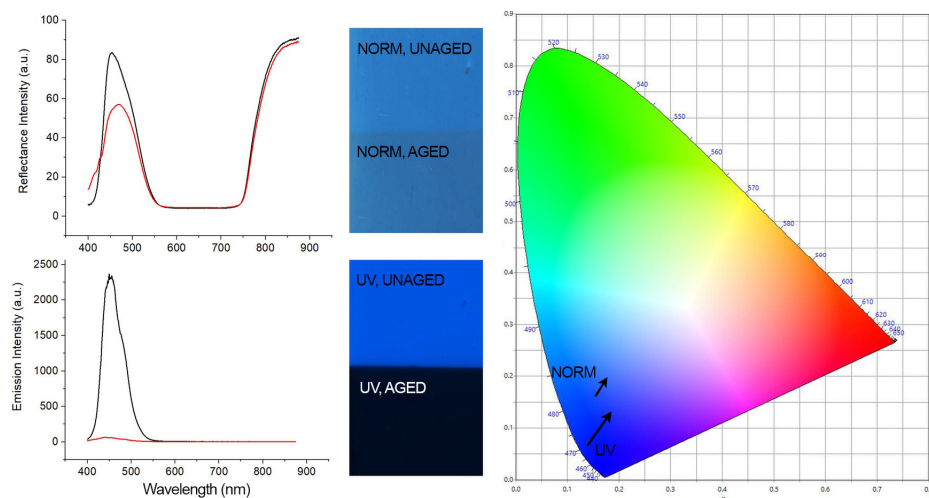

**Figure S5.** Left: Spectra of Kremer Blue unaged (black line) and aged (red line) showing a change a visible induced spectral shift and UV-induced ( $\lambda$  exc.  $\approx 365$  nm) spectral shift. Center: Corresponding images of the samples realized using RGB imaging system as described in the imaging section. Right: CIE 1931 (x,y) color space chromaticity diagram detailing the visual color changes indicated by direction of arrows.

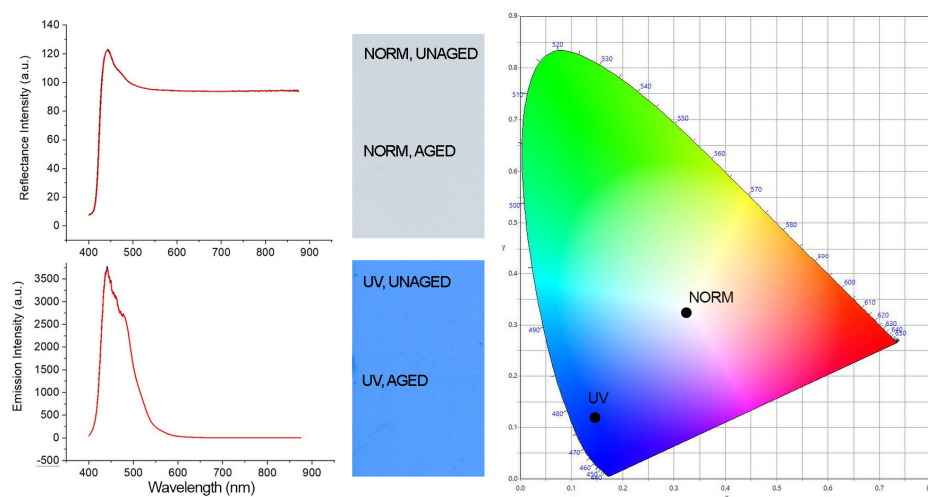

**Figure S6.** Left: Spectra of Kremer White unaged (black line) and aged (red line) showing a change a visible induced spectral shift and UV-induced ( $\lambda$  exc.  $\approx 365$  nm) spectral shift. Center: Corresponding images of the samples realized using RGB imaging system as described in the imaging section. Right: CIE 1931 (x,y) color space chromaticity diagram detailing the visual color changes indicated by a dot (no change).
