# Supplementary material
Source: MDPI journal article supplement (https://www.mdpi.com/2079-6447/1/2/13)
Supplement: s1 [file s1 › Supplementary_2_raw_spectral_data.xlsx]

## Sheet: Sheet1
Wavelength (nm)	Kremer Fluorescent Blue (56050) (UV λ exc. =365 nm) Unaged	Kremer Fluorescent Blue (56050) (UV λ exc. =365 nm) Aged	Kremer Fluorescent Blue (56050) Unaged	Kremer Fluorescent Blue (56050) Aged	Kremer Fluorescent Brick Red (56300) (UV λ exc. =365 nm) -Unaged	Kremer Fluorescent Brick Red (56300) (UV λ exc. =365 nm) -Aged	Kremer Fluorescent Brick Red (56300) Unaged	Kremer Fluorescent Brick Red (56300) Aged	Kremer Fluorescent Golden Orange (56200) (UV λ exc. =365 nm) -Unaged	Kremer Fluorescent Golden Orange (56200) (UV λ exc. =365 nm) -Aged	Kremer Fluorescent Golden Orange (56200) Unaged	Kremer Fluorescent Golden Orange (56200) Aged	Kremer Fluorescent Orange (56250) (UV λ exc. =365 nm) Unaged	Kremer Fluorescent Orange (56250) (UV λ exc. =365 nm) Aged	Kremer Fluorescent Orange (56250) Unaged	Kremer Fluorescent Orange (56250) Aged	Kremer Fluorescent Green (56100) (UV λ exc. =365 nm) Unaged	Kremer Fluorescent Green (56100) (UV λ exc. =365 nm) Aged	Kremer Fluorescent Green (56100) Unaged	Kremer Fluorescent Green (56100) Aged	Kremer Fluorescent Violet (56450) (UV λ exc. =365 nm) Unaged	Kremer Fluorescent Violet (56450) (UV λ exc. =365 nm) Aged	Kremer Fluorescent Violet (56450) Unaged	Kremer Fluorescent Violet (56450) Aged	Kremer Fluorescent Flame Red (56350) (UV λ exc. =365 nm) Unaged	Kremer Fluorescent Flame Red (56350) (UV λ exc. =365 nm) Aged	Kremer Fluorescent Flame Red (56350) Unaged	Kremer Fluorescent Flame Red (56350) Aged	Kremer Fluorescent Lemon Yellow (56150) (UV λ exc. =365 nm) Unaged	Kremer Fluorescent Lemon Yellow (56150) (UV λ exc. =365 nm) Aged	Kremer Fluorescent Lemon Yellow (56150) Unaged	Kremer Fluorescent Lemon Yellow (56150) Aged	Kremer Fluorescent White (56000) (UV λ exc. =365 nm) Unaged	Kremer Fluorescent White (56000) (UV λ exc. =365 nm) Aged	Kremer Fluorescent White (56000) Unaged	Kremer Fluorescent White (56000) Aged
400.208	60.59	24.66	6.14	13.4	22.73	11.05	9.58	15.42	16.74	10.8	7.11	7.28	19.07	8.23	9.01	8.46	6.78	7.19	7.17	7.45	14.38	15.59	26.07	35.99	27.39	14.2	27.09	26.01	13.32	8.7	9.42	9.48	50.07	49.99	7.47	7.46
400.57	64.49	25.1	5.48	13.52	23.73	11.41	9.7	15.05	17.9	11.5	6.83	6.97	19.89	9.27	8.69	8.46	5.82	7.13	6.23	6.29	13.9	14.85	25.97	35.29	29.35	15.24	26.41	26.13	13.02	8.64	8.61	8.99	54.13	54.03	7.91	7.09
400.932	63.87	24.78	5.87	14.63	23.75	12.79	9.89	15.95	17.74	11.46	7.65	7.83	20.07	8.95	9.6	8.87	6.52	6.87	7.1	6.49	14.4	14.81	27.33	36.03	29.63	13.88	26.61	26.89	13.94	9.72	9.43	8.83	56.31	55.51	8.03	8.17
401.293	67.69	25.5	6.34	14.62	25.77	11.51	10.1	15.57	19	11.04	7.24	7.67	20.73	9.39	9.28	8.69	5.58	6.61	7.46	6.87	14.22	14.81	27.4	35.78	31.99	14.12	25.98	27.1	13.64	8.62	9.16	9.86	61.19	60.61	8.18	7.98
401.655	68.33	26.44	6.37	14.04	26.49	12.43	9.81	15.18	20.2	12.1	7.59	7.61	21.53	10.31	8.67	8.52	7.44	7.51	7.21	7.38	14.64	15.75	26.62	36.53	32.25	14.82	26.91	26.71	14.74	9.1	9.06	9.62	64.81	64.01	8.3	8.04
402.017	69.73	25.56	5.38	13.64	26.33	12.31	8.71	14.7	20.24	11.84	6.4	6.98	21.09	9.89	8.61	7.57	5.96	7.47	6.74	6.08	13.46	15.37	25.78	35.23	32.47	13.96	26.34	26.72	13.84	8.62	8.46	8.34	69.37	67.21	7.73	7.36
402.378	74.35	27.8	5.23	13.75	28.61	13.23	9.26	14.94	20.24	12.3	6.79	7.45	22.43	10.23	8.11	7.62	5.66	7.55	6.74	5.82	13.92	14.55	26.2	35.9	34.09	15.08	26.38	26.81	15.28	8.38	7.91	8.7	75.21	74.47	8.11	7.7
402.74	79.03	28.86	5.39	15.41	30.65	13.65	9.64	15.62	21.96	12.26	7.26	7.11	23.69	9.75	8.28	7.85	6.4	7.59	7.12	6.63	13.9	15.57	26.23	36.02	36.23	14.86	26.83	27.08	15.18	8.76	8.63	9.48	80.91	78.67	8.62	7.62
403.101	78.91	30.26	6.11	15.1	31.61	13.75	9.42	15.19	21.28	13.54	7.01	7.51	24.53	10.77	8.1	8.33	6.5	7.95	7.3	6.47	13.5	15.89	26.64	36.2	37.83	15.74	27.33	27.44	16.26	9.7	8.37	9.38	84.59	83.93	8.1	7.88
403.463	83.67	29.6	5.73	15.42	31.31	13.99	9.63	15.3	22.76	12.52	6.63	7.43	24.17	9.53	8.2	8.06	6.34	6.85	6.4	6.9	12.82	15.01	26.14	36.3	38.71	13.74	27.55	27.27	15.32	9.08	7.81	9.01	89.29	88.17	8.31	8.38
403.824	82.51	30.94	6.27	15.31	31.61	13.65	8.67	15.04	21.5	13.6	6.95	7.03	23.83	10.11	7.99	8.31	5.88	7.85	6.84	6.24	13.76	15.21	25.72	35.7	38.31	15.02	27.16	27.1	16.5	9.52	7.94	9.3	93.17	92.81	8.28	8.03
404.185	91.97	32.84	5.97	15.14	33.79	15.47	8.94	15.08	23.92	14.88	6.64	7.26	26.47	10.71	8.12	8.04	6.82	8.27	6.71	6.64	14.6	16.25	25.86	36.11	41.11	16.58	26.77	27.22	16.62	10.7	7.86	8.76	104.77	102.43	8.55	7.64
404.547	93.91	32.84	6.11	15.83	34.75	15.55	8.96	15.24	23.92	15.14	6.86	7.5	26.03	11.09	8.15	7.83	6.42	8.19	6.89	6.68	13.44	15.57	25.87	36.55	41.93	16.28	27.62	27.39	17.98	11.04	8.16	9.17	108.59	106.77	8.19	8.29
404.908	98.59	33.32	6.6	16.09	34.47	14.79	9.22	15.65	24.08	14.64	7.17	7.57	25.55	11.57	7.87	8.42	5.42	7.83	6.93	6.55	13.74	15.87	26.48	37.06	42.87	17.38	27.48	27.51	16.66	10.12	8.5	9.07	115.07	114.07	8.97	8.41
405.269	104.63	35.24	6.19	16.12	35.27	15.95	9.09	15.86	24.64	15	6.65	7.33	27.21	11.35	8.42	8.3	5.74	7.67	6.59	6.95	14.72	17.09	26.33	36.94	44.69	16.5	27.43	27.44	16.64	10.5	7.64	8.67	125.81	122.89	8.39	8.3
405.631	106.13	35.78	6.31	16.69	34.95	16.07	9.12	15.39	24.04	15.82	6.65	7.4	24.79	11.57	7.71	8.23	5.32	8.21	6.51	6.54	13.78	16.13	25.61	36.8	44.21	18.44	27.52	27.29	16.62	11.3	7.74	8.75	127.53	126.81	8.53	8.6
405.992	115.79	39.36	6.63	16.65	40.89	20.31	9.14	15.39	27.38	19.24	6.92	7.81	29.35	14.03	7.19	8.56	8.5	11.85	6.26	6.92	18.26	20.41	26.59	36.5	49.39	21.64	27.53	26.95	20.18	14.96	7.04	9.16	139.59	137.67	9.28	8.81
406.353	116.41	38.58	6.22	16.91	37.33	17.29	8.85	14.9	26.12	16.66	6.64	7.23	26.71	12.57	7.24	8.25	6.14	9.65	6.52	6.5	14.2	17.05	26.12	36.32	47.71	17.66	27.67	27.17	16.7	11.82	7.33	8.68	147.01	144.45	8.7	8.67
406.714	120.23	37.78	5.73	16.84	37.53	16.91	8.89	15.06	24.74	16.72	5.97	6.8	26.59	11.77	7.19	7.71	7.2	8.91	5.75	6.12	14	17.11	26.02	36.8	47.65	18.12	27.74	27.41	16.64	12.12	6.6	8.36	152.31	148.57	8.97	8.54
407.075	123.05	38.54	6.1	17.34	36.07	16.65	8.31	14.5	24.32	16.36	5.81	6.26	25.83	11.93	6.97	7.14	5.86	7.73	5.71	5.83	13.32	16.47	25.3	36.06	46.79	18.4	27.27	27.57	16.16	11.9	6.98	7.91	155.21	152.27	8.57	7.93
407.436	128.83	38.78	6.44	17.53	35.87	17.55	8.84	15.21	23.28	16.94	6.16	7.18	25.77	12.39	7.16	7.13	5.38	7.97	6.21	6.58	14.44	16.91	25.49	37.14	47.63	19.4	28.13	27.84	16.48	12.22	6.7	8.85	163.99	160.95	8.99	8.75
407.797	138.07	41.46	6.76	18.18	36.97	18.29	8.82	15.36	24.44	17.56	6.74	6.79	26.77	12.51	7.55	8	5.66	9.45	6.66	6.67	13.68	17.79	25.74	37.41	48.91	18.82	28.21	27.55	16.34	12.76	7.07	9.08	177.09	173.61	9.3	8.98
408.158	140.13	42.3	6.61	18.17	37.19	18.45	8.61	15.33	23.66	19.38	6.37	7.33	25.55	13.17	7.02	7.47	6.28	9.61	6.17	6.45	13.92	17.59	25.55	37.37	48.51	19.74	28.29	27.54	16.62	12.56	6.9	8.85	181.05	179.41	9.53	9.23
408.519	146.01	42.72	6.94	18.76	36.47	17.85	8.88	15.35	24.3	18.46	6.52	7.39	25.51	12.51	7.2	7.85	5.84	9.25	6.4	6.35	14.6	17.21	25.79	37.66	48.95	19.56	28.74	28.03	16.4	12.8	6.57	8.8	188.99	187.23	9.42	8.99
408.88	154.49	44.58	6.76	18.63	37.67	19.71	8.11	15.54	23.32	19.84	6.28	7.23	25.77	13.95	6.48	7.51	6.36	9.85	5.85	5.87	14.7	17.57	25.6	36.63	49.19	20.8	28.33	27.7	16.96	13.32	6.86	8.63	200.53	199.31	9.48	9.24
409.241	164.57	45.66	7.29	19.23	38.11	19.71	8.85	15.74	24.34	20.42	5.97	7.02	24.79	14.21	6.73	8	6.12	9.41	6.12	6.38	13.84	17.59	26.22	37.57	50.59	21.14	28.99	28.16	15.42	14.06	7.01	8.89	217.23	214.63	9.75	9.46
409.602	168.55	45.4	7.24	19.45	37.51	19.25	9.19	15.74	23.44	20.98	6.35	7.48	24.61	14.01	7.32	8.01	5.58	9.25	6.33	6.71	13.56	17.33	26.04	38.06	49.33	21.3	29.77	28.4	15.66	14.54	7.31	8.96	221.13	218.01	10.4	10.08
409.962	171.27	46.44	6.88	19.7	36.11	19.49	8.23	15.69	22.8	21.1	6.43	6.84	23.93	13.95	6.43	7.81	6.2	9.67	5.99	6.21	14.32	17.51	25.71	37.54	48.59	21.22	29.33	28.33	15.54	15.46	6.87	9.04	226.95	224.33	10.6	9.87
410.323	180.37	46.46	7.16	20	35.45	19.95	8.9	15.9	21.88	21.04	6.26	7.06	23.71	13.83	7	7.99	5.66	10.55	5.93	6.32	13.86	18.29	26.08	37.85	49.53	22.08	29.95	28.2	14.9	15.18	6.43	8.78	241.01	237.89	10.91	10.53
410.684	193.91	49.02	7.22	19.88	36.55	21.59	8.2	15.58	23.94	22.16	6.07	6.59	24.07	15.37	6.14	7.68	6.54	10.75	5.74	6.48	15.34	19.11	25.97	37.7	51.41	23.34	30	28.23	15.4	15.86	6.46	8.6	258.93	255.99	10.3	10.12
411.044	199.07	48.3	7.63	20.06	34.95	20.17	8.73	15.68	22.32	20.34	6.28	6.92	22.99	14.93	6.45	7.42	6.18	10.37	5.6	6.57	13.96	18.89	26.02	37.89	50.15	23.38	30.1	28.88	15.12	16.56	6.25	8.66	266.95	263.35	11.28	10.67
411.405	213.49	50.54	7.58	20.27	36.13	20.85	8.05	15.43	22.38	22.04	5.89	6.43	23.13	15.55	6.29	7.26	5.44	11.45	5.58	5.98	14.28	18.55	25.86	37.9	51.33	23.64	30.31	28.63	14.22	15.88	6.41	8.42	287.33	284.75	11.14	10.44
411.766	220.15	51.14	7.44	20.6	35.69	20.49	7.8	15.53	22.68	23.02	5.64	6.49	22.27	15.39	6.18	7.26	6.26	10.97	5.37	5.72	14.24	19.07	25.77	37.8	50.73	23.7	30.53	28.22	14.24	16.1	5.79	8.18	296.57	294.09	11.56	10.61
412.126	227.49	52.46	7.76	21.1	35.33	20.61	8.13	15.81	21.24	21.9	5.55	6.72	21.79	15.61	6.47	7.79	5.48	10.71	5.83	6.14	13.56	19.11	26.05	37.86	49.63	24.18	30.68	29.12	14.22	17.1	6.29	8.52	309.03	305.79	12.51	11.3
412.487	239.83	52.92	7.62	21	34.95	21.49	8.1	16.01	21.44	24.18	5.81	6.98	22.35	15.87	6.32	7.44	6.66	11.97	5.42	6.06	14.8	19.61	26.38	38.6	51.09	23.42	31.54	28.89	14.52	17.82	6.19	8.65	326.39	322.65	13.05	12.13
412.847	248.11	53.78	8.35	21.34	34.29	21.43	8.46	15.61	20.66	23.94	5.73	6.76	22.15	15.31	6.34	7.37	6.36	11.21	5.65	6.03	14.14	19.07	25.93	38.33	50.73	24.3	31.53	29.05	14	18.24	6.04	8.56	339.65	335.49	13.09	12.15
413.208	259.33	53.94	8.1	21.07	33.63	21.17	8.23	15.77	21.12	24.08	5.27	6.72	21.77	17.31	5.8	7.25	6.22	10.79	5.56	5.64	13.36	19.71	26.04	38.27	50.11	25.48	31.62	29.19	13.58	18.2	6.01	8.62	358.95	354.21	13.45	12.78
413.568	262.15	53.68	8.29	21.58	32.91	21.89	8.07	15.63	19.64	22.94	5.4	6.68	21.51	15.77	6.2	7.44	6.02	11.77	5.33	5.94	14	18.77	25.88	38.29	49.95	24.64	32.09	29.22	13.22	18	5.99	8.33	364.25	357.59	13.98	12.81
413.928	273.93	53.94	8.85	21.8	32.41	22.07	8.04	16.17	20.22	23.72	5.57	6.78	19.51	16.69	6.56	7.86	6.14	11.53	5.47	6.26	13.5	18.07	25.78	38.89	49.77	24.38	32.82	29.54	13.36	18.54	6.3	8.74	380.13	375.45	15.56	13.74
414.289	284.27	54.14	9.18	21.79	32.85	22.07	8.26	16.3	20.36	24.54	5.54	7.01	20.89	17.35	6.04	7.84	6.2	11.71	5.38	5.97	13.74	18.93	26.08	38.91	49.43	24.58	33.45	29.57	13.7	19.24	5.64	8.63	399.47	391.73	15.93	14.73
414.649	294.43	55.08	8.57	21.34	31.09	22.01	7.61	15.8	19.56	24.34	5.32	6.6	19.85	17.41	5.8	7.02	6.22	12.79	4.95	5.83	13.92	19.31	25.95	38.63	49.59	24.6	33.31	29.48	13.78	20.56	6.11	8.17	416.27	410.27	16.12	14.81
415.009	319.57	56.22	9.45	22.12	32.45	23.33	8.54	16.16	19.5	26.62	6.04	7.05	20.65	18.03	6.28	7.73	6.2	13.13	5.74	6.27	14.22	18.97	26.21	39.13	51.35	25.3	33.59	29.94	12.52	22.32	6.08	8.78	453.25	445.21	17.82	15.54
415.369	321.29	55.04	9.4	21.98	30.69	23.33	8.05	15.87	19.2	25.2	5.29	6.77	19.29	17.05	5.78	7.11	5.46	12.09	5.26	6.14	13.26	19.33	26.12	39.23	49.41	24.68	33.62	29.51	12.36	20.32	5.58	8.98	461.49	453.59	18.31	16.3
415.729	338.47	56.64	9.94	22.24	32.51	22.77	8.42	16.15	19.22	26.56	5.53	6.87	19.07	18.53	5.77	7.34	6.08	12.39	5.45	6.03	14.08	20.33	26.74	39.41	51.27	26.32	34.68	30.97	12.56	21.58	6.07	8.6	489.33	482.07	19.7	17.1
416.09	360.83	57.38	10.1	22	32.91	22.93	7.97	16.28	20.36	26.62	5.19	6.62	19.19	18.63	5.67	7.2	5.34	12.25	4.99	5.8	14.02	20.19	25.82	39.62	52.45	26.92	34.52	30.63	11.74	22.44	5.52	8.47	528.87	516.69	20.28	18.06
416.45	347.51	54.96	10.76	22.42	30.67	22.67	7.97	16.51	18.62	24.88	5.5	7.07	18.69	18.75	5.72	7.76	6.14	13.25	5.76	6.11	14.66	19.55	26.12	39.89	49.85	25.32	34.69	30.95	12.36	21.76	6.04	8.75	518.09	504.59	21.79	19.18
416.81	370.55	54.36	10.61	22.32	30.31	22.61	7.87	16.49	18.76	26.5	5.6	6.97	19.09	18.47	5.51	7.85	6.96	13.43	5.31	5.73	14.18	20.21	26.37	39.75	50.99	26.28	35.37	30.92	12.32	22.1	5.63	8.96	554.47	542.79	23.26	20.19
417.17	388.95	56.14	10.69	22.16	30.67	22.85	7.9	16.71	17	26	5.49	6.69	18.49	17.89	5.61	7.12	5.64	12.99	5.14	6	13.66	19.25	26.33	39.72	50.81	26.16	35.51	31.18	12.52	22.62	5.81	8.75	589.87	576.67	24.19	21.31
417.53	405.53	56.14	11.63	22.49	30.99	23.35	8.01	16.6	17.8	26.46	5.63	7.08	18.41	18.33	6.19	7.57	5.8	13.57	5.07	6.57	14.12	19.79	26.66	39.69	51.31	25.68	35.94	31.06	12.92	22.58	5.69	9.03	620.31	603.71	25.4	22.48
417.89	423.61	56.62	11.93	22.49	30.57	23.11	7.82	16.69	17.9	26.8	5.27	6.85	19.03	19.03	5.6	6.84	5.38	14.23	5.91	6.05	13.08	19.81	26.46	39.75	52.17	25.56	35.95	31.12	11.92	23.66	5.57	8.41	657.87	638.41	27.37	23.46
418.249	454.51	57.96	12.06	22.84	31.37	23.61	8.14	16.46	18.3	29.16	5.26	6.71	18.33	20.11	5.77	7.39	5.84	13.87	5.6	5.89	13.94	20.03	26.58	39.84	53.17	27.2	36.38	31.22	13.12	24.5	5.78	8.64	710.93	688.39	29.2	25.22
418.609	463.35	60.08	12.46	22.75	32.45	25.69	7.51	16.36	19.68	29.86	5.41	6.85	20.59	20.89	5.3	7.21	7.6	16.35	5.18	5.65	15.64	22.61	26.38	39.68	56.07	28	36.24	31.7	15.02	27.22	5.46	8.64	735.45	712.77	30.77	26.49
418.969	480.79	58.34	12.65	22.69	31.53	23.77	7.16	16.33	19.14	29.14	5.41	6.68	19.01	20.05	5.67	7.47	7.12	14.25	5.25	5.57	13.98	20.73	26.17	39.67	54.25	27.74	36.61	31.4	13.24	26.68	5.43	8.55	768.35	742.21	33.07	28.34
419.329	516.65	59.42	13.18	23.35	32.35	24.17	7.85	16.88	17.8	29.16	5.17	6.73	18.41	19.93	5.28	7.37	5.72	14.51	5.42	5.8	13.74	21.45	26.36	39.87	55.45	26.64	36.8	31.46	12.74	26.22	5.74	9	833.85	803.37	35.06	30.07
419.689	518.83	59.18	13.95	23.24	30.77	24.15	7.66	16.95	18.46	27.88	5.21	6.48	18.11	20.39	5.53	7.15	5.62	14.15	5.56	6.03	13.98	20.67	26.41	40.32	53.81	26.74	37.27	32.02	11.8	26.62	5.31	8.69	845.85	817.41	37.13	31.9
420.048	542.61	59.86	14.29	23.83	30.93	24.15	7.43	16.98	17.9	28.94	5.17	6.67	18.15	20.45	5.21	7.37	5.46	13.83	5.03	5.91	14.18	20.65	26.61	40.36	55.75	26.34	37.03	31.85	12.56	26.94	5.58	8.68	897.65	862.95	39.66	34.09
420.408	583.97	62.08	14.53	23.4	32.13	24.41	7.61	16.56	18.44	30.52	5.12	6.42	18.69	21.47	5.31	7.14	4.7	15.53	4.73	5.64	14.4	21.21	26.23	40.18	56.41	27.62	37.29	32.09	12.12	27.96	5.28	8.33	971.77	936.33	41.89	36.05
420.767	564.33	59.12	15.33	24.1	30.29	22.35	7.6	16.49	17.08	27.92	5.24	6.76	17.31	19.51	5.49	7.2	5.52	14.51	4.97	5.62	13.2	19.79	26.19	40.52	54.49	25.28	37.22	32.27	11.86	27.06	5.35	8.9	943.39	908.55	44.16	38.36
421.127	623.59	63.68	16.09	24.25	32.41	24.77	7.73	16.93	19.12	29.78	5.12	6.84	18.47	21.45	5.54	7.68	5.9	15.37	5.28	6.01	13.46	21.35	26.62	40.78	58.61	26.88	37.94	32.47	12.06	29.08	5.55	8.79	1054.27	1013.13	47.33	41.05
421.487	662.71	65.18	16.46	24.98	33.07	24.95	7.4	16.55	18.26	31.42	5.3	6.68	18.71	22.71	5.52	7.27	6.3	16.43	5.25	5.85	14.66	22.43	26.3	40.37	61.19	26.96	37.48	32.56	13.42	29.4	5.45	8.91	1122.09	1080.69	48.85	43.14
421.846	681.31	64.66	16.67	25.12	32.83	24.53	7.6	16.5	18.8	29.76	4.82	6.64	19.49	21.77	5.26	7.2	5.84	16.31	4.73	5.48	14.1	20.89	26.39	40.37	58.75	27.42	37.69	32.41	12.4	30.04	5.13	9.02	1154.73	1111.59	52.61	45.55
422.206	727.15	67.66	17.79	25.44	32.95	25.19	7.02	16.65	17.72	31.68	5.01	6.49	18.95	22.33	5.23	6.81	5.42	17.03	4.94	5.79	14.08	21.11	26.28	40.98	61.23	27.26	38.44	32.96	12.22	31.48	5.16	8.44	1239.29	1192.23	55.28	48.79
422.565	766.63	69.36	18.28	25.77	33.65	26.13	7.15	16.51	19.16	32.24	5.05	6.45	19.25	22.47	5.25	6.75	5.94	16.51	4.92	5.87	14.5	21.79	26.29	40.9	63.55	26.96	38.18	32.3	12.96	31.5	5.19	8.88	1310.25	1264.11	57.99	51.07
422.924	775.75	67.9	18.78	26.41	33.71	25.33	7.48	16.73	18.78	31.48	5.26	6.96	19.31	21.69	5.31	7.12	5.26	16.69	5.09	5.94	14.32	20.83	26.52	41.12	64.05	26.66	38.88	32.86	13.16	31.58	5.22	8.94	1323.95	1276.25	61.4	54.05
423.284	828.93	71.42	19.98	27.2	35.31	26.53	7	16.89	20.22	34.86	5.1	6.75	19.81	23.85	5.3	7.3	6.5	17.55	5.03	5.64	15.06	23.35	26.61	41.36	65.87	28.72	39.2	32.87	13.96	33.84	5.45	8.96	1414.39	1366.27	64.01	56.73
423.643	889.69	73.1	20.23	27.16	36.73	27.01	6.86	16.97	19.58	34.66	5	6.4	20.27	22.99	5.25	7.11	6.44	17.67	4.91	5.91	14.6	23.09	26.47	41.26	68.17	28.98	38.94	33.16	13.34	35.14	5.11	8.79	1523.31	1468.33	66.04	59.42
424.002	871.67	70.5	21.25	27.55	34.03	26.45	7.1	17.03	20.42	33.32	5.08	6.66	19.29	24.01	5.2	7.27	6.82	18.65	4.92	5.77	14.72	21.73	26.32	41.72	66.65	28.96	38.96	33.18	13.66	35.02	5.46	8.79	1489.67	1436.15	68.87	61.75
424.361	926.69	71.46	21.83	27.72	34.61	27.13	6.87	16.67	19.5	34.02	4.85	6.07	20.01	23.09	4.83	6.69	6.06	18.15	4.65	5.69	14.16	22.13	25.96	40.96	69.01	28.72	38.85	32.98	13.08	35.68	4.83	8.64	1579.45	1526.11	71.52	65.01
424.721	1000.03	74.74	22.73	28.76	36.47	27.67	7.14	16.86	19.2	35.22	4.96	6.4	20.75	25.07	5.21	6.97	5.36	18.47	4.95	5.85	14.92	23.05	26.47	41.77	72.63	29.52	39.69	33.05	13.54	36.54	4.77	8.65	1692.23	1642.35	75.56	67.99
425.08	1042.97	73.82	23.6	28.88	36.99	27.51	7.02	16.88	20.34	36.1	5.16	6.41	20.43	25.03	5.32	7.15	6.18	18.07	4.9	5.86	15.02	22.43	26.59	41.55	73.53	28.12	39.53	33.45	13.02	38.02	5.06	9.04	1753.71	1700.81	77.24	70.04
425.439	1048.31	75.08	24.49	29.11	37.45	27.17	6.79	17.16	20.8	34.96	4.92	6.45	20.55	25.49	5.27	7.02	5.7	19.33	4.92	6.01	14.3	22.47	26.63	41.88	73.03	28.62	39.64	33.36	14	38.28	4.94	8.76	1760.87	1705.69	79.97	73.2
425.798	1076.67	75	25.1	28.76	36.41	27.11	6.55	16.57	20.28	34.92	4.31	5.97	20.45	25.27	4.6	6.58	6.16	18.17	4.37	5.19	14.44	22.65	26.06	41.08	73.09	28.8	39.41	33.32	13.56	37.96	4.74	8.51	1797.47	1746.27	81.95	75.8
426.157	1178.33	79.74	25.84	29.61	39.03	28.33	6.97	16.75	20.7	37.9	4.72	6.45	21.41	26.75	4.96	6.93	6.62	20.13	4.69	5.74	14.44	24.71	26.81	41.51	78.59	30.66	39.48	33.31	13.78	40.4	4.95	8.68	1957.47	1903.83	84.6	78.11
426.516	1181.73	77.58	26.58	29.81	37.53	27.83	6.72	16.48	20.44	36.28	4.97	6.22	20.17	25.51	4.89	6.75	6.08	19.83	4.77	5.71	14.48	21.79	26.69	41.55	77.23	30.12	39.56	33.63	13.9	40.18	4.84	8.47	1953.89	1898.29	87.11	80.72
426.875	1300.17	82.28	27.51	29.59	40.71	30.77	6.77	16.43	22.36	38.54	4.86	6.43	22.73	27.61	4.99	6.89	6.66	21.11	4.78	5.71	15.96	24.43	26.57	41.8	82.59	31.58	39.91	33.43	15.06	43.88	4.98	8.62	2130.81	2073.37	89.23	83.26
427.234	1318.69	81.18	28.11	29.89	39.87	30.57	6.61	16.67	21	39.58	4.93	6.49	22.33	27.23	4.91	6.82	6	20.67	5	5.64	15.14	24.71	26.58	41.66	82.27	32.06	39.62	33.24	15	43.82	4.9	8.45	2155.07	2102.01	91.17	85.63
427.593	1400.87	83.08	29	29.92	41.29	30.95	6.35	16.47	22.7	40.64	4.71	6.13	22.81	27.49	4.71	6.84	5.66	20.17	4.41	5.51	14.8	25.39	26.6	41.95	85.93	32.46	39.62	33.49	14.62	45.72	4.73	8.64	2277.47	2216.95	92.8	86.82
427.951	1365.81	78.78	30.29	30.2	39.45	29.85	6.67	16.62	20.58	39.46	4.67	6.29	22.21	27.19	4.9	6.45	5.56	19.81	4.82	5.48	15.08	24.05	26.35	41.94	82.07	30.6	40.33	33.61	14.22	44.22	4.82	8.69	2216.69	2159.25	95.31	90
428.31	1474.17	82.58	30.66	29.88	42.29	31.91	6.03	16.26	22.7	41.28	4.54	6.1	22.25	28.31	4.89	6.41	6.58	21.31	4.69	5.25	14.82	25.17	26.21	42.11	87.29	33.16	40.06	33.14	14.72	46.62	4.59	8.49	2368.11	2311.21	96.6	91.84
428.669	1454.47	79.9	31.52	30.18	41.43	30.79	6.17	16.43	22.08	40.44	4.38	6.17	22.87	26.91	4.74	6.58	6.42	21.25	4.42	5.34	14.3	24.45	26.25	41.95	85.29	31.88	40.17	33.31	15.26	46.32	4.4	8.92	2335.41	2282.25	99.35	94.27
429.028	1554.05	82.94	32.11	30.03	41.63	32.19	6.28	16.36	22.5	42.56	4.81	5.95	22.29	29.81	4.76	6.65	6.72	22.23	4.53	5.52	15.66	24.67	26.53	42.22	89.81	33.32	40.21	33.45	14.42	48.44	4.68	8.44	2478.09	2425.39	100.22	95.54
429.386	1711.95	89.9	33.53	30.26	47.03	36.49	6.3	16.78	25.78	46.48	4.63	6.34	26.09	33.83	4.77	6.71	7.84	24.99	4.84	5.7	18.5	29.13	26.59	42.35	100.43	37	40.38	33.6	17.94	55.18	4.79	8.82	2710.69	2650.31	101.85	97.51
429.745	1739.63	86.82	34	30.37	44.35	33.13	5.94	16.44	23.02	44.62	4.5	5.99	23.41	31.13	4.58	6.4	5.02	22.91	4.5	5.33	16.6	26.85	26.48	42.16	97.01	34.8	40.11	33.15	15.84	53.2	4.43	8.62	2736.61	2680.71	102.48	99.1
430.104	1679.11	82.64	34.59	30.54	42.03	31.51	6.03	16.3	22.76	43.4	4.47	5.95	22.25	29.81	4.71	6.63	5.4	21.61	4.5	5.55	14.68	24.71	26.59	42.8	91.47	33.46	40.41	33.63	14.38	50.52	4.44	8.59	2628.67	2577.27	104.41	100.73
430.462	1734.11	84.14	35.5	30.68	43.13	33.17	6.09	16.55	22.58	43.22	4.57	6.05	22.59	31.37	4.75	6.7	6.72	22.45	4.54	5.69	15.34	26.33	26.58	42.39	92.77	34.76	40.48	33.39	14.86	52.72	4.56	8.83	2695.59	2645.33	105.85	102.11
430.821	1795.67	84.24	36.44	30.83	43.73	32.49	6	16.45	22.64	43.7	4.65	6.09	21.57	31.15	4.79	6.38	5.52	22.63	4.5	5.3	15.34	24.69	26.59	42.31	94.79	34.02	40.2	33.52	14.08	52.4	4.82	8.73	2776.15	2721.63	106.27	103.22
431.179	1856.63	85.72	37.31	30.82	44.27	33.19	5.81	16.1	22.92	44.7	4.36	5.86	23.17	31.77	4.31	6.32	6.42	23.57	4.35	5.14	16.4	26.15	26.23	42.3	97.21	35.24	40.34	33.25	15.68	54.76	4.24	8.28	2848.17	2794.33	107.75	104.36
431.538	1864.05	83.22	38.33	31.65	41.85	32.39	5.9	16.47	22.24	44.4	4.58	5.99	22.19	30.75	4.68	6.45	6.24	23.53	4.58	5.49	15.38	24.99	26.95	42.94	95.27	33.94	41.05	33.71	14.52	54.04	4.61	8.87	2827.45	2774.67	109.06	105.84
431.896	2036.79	89.08	39.18	31.43	42.89	35.33	6.09	16.34	23.26	46.94	4.46	5.99	24.41	32.77	4.64	6.54	7.12	24.17	4.54	5.45	15.86	26.99	26.59	42.76	101.65	35.56	40.77	33.39	15.32	59.04	4.69	8.64	3055.93	2999.39	110.19	107.76
432.254	2052.95	88.64	40.73	32.3	42.71	34.03	6.06	16.36	22.1	47.34	4.64	6.1	22.71	32.53	4.54	6.47	6.02	24.29	4.55	5.47	15.7	27.37	26.82	42.83	98.41	35.32	41.16	33.66	15.92	58.8	4.44	8.61	3044.47	2988.35	111.19	108.9
432.613	2101.53	90.02	41.54	32.53	44.41	35.09	6.02	16.04	22.76	48.2	4.68	6.05	24.23	32.85	4.79	6.67	6.2	25.85	4.73	5.42	17.84	27.35	27.06	43.05	100.51	36.4	40.98	33.68	15.7	60.68	4.68	8.77	3088.99	3030.91	111.21	109.7
432.971	2244.09	92.7	42.73	33.14	44.77	36.39	6	16.45	22.92	49.72	4.6	5.91	23.45	33.43	4.81	6.6	6	25.25	4.64	5.52	15.42	27.37	27.14	43.4	102.55	38.16	41.5	33.65	15.56	61.6	4.78	8.82	3245.53	3194.21	112.7	110.72
433.329	2312.01	94.82	43.88	33.29	44.93	36.07	5.75	16.18	23.14	50.14	4.33	5.8	24.37	35.59	4.51	6.34	6.16	25.27	4.41	5.35	16.38	27.87	27.05	42.74	104.91	38.46	41.47	33.2	15.4	64.38	4.73	8.68	3303.59	3251.45	114.04	112.17
433.687	2288.57	91.52	44.86	33.91	43.49	36.21	5.73	16.15	22.44	48.92	4.44	6.06	23.43	35.55	4.63	6.4	6.78	25.05	4.6	5.42	16.12	28.45	26.79	43.11	101.69	37.78	41.52	33.4	15.2	63.28	4.21	8.84	3232.77	3183.17	114.54	113.08
434.045	2476.85	98.84	46.09	34.31	45.83	38.71	5.66	16	24.16	52.88	4.53	5.91	23.43	36.91	4.6	6.15	7.02	28.17	4.33	5.35	17.86	29.49	27.09	43	106.53	39.84	41.25	33.37	16.74	69.34	4.41	8.42	3453.85	3395.93	115.55	113.82
434.404	2364.51	91.84	47.34	35	40.57	34.69	5.92	16.1	22.02	47.76	4.47	6.14	20.89	33.77	4.45	6.18	5.24	25.23	4.44	5.48	15.72	27.03	27.07	43.28	98.35	35.96	41.62	33.17	13.92	63.66	4.5	8.66	3257.41	3206.63	116.35	114.99
434.762	2435.35	92.6	48.41	35.2	41.19	35.55	5.57	16	21.82	49.72	4.32	5.92	21.37	34.71	4.44	6.2	5.86	25.13	4.28	5.42	15.78	27.15	26.68	43.17	98.31	37.74	41.47	33.23	14.56	65.46	4.36	8.61	3311.63	3257.73	116.8	115.15
435.12	2575.25	96.26	50.18	35.71	41.97	37.03	5.53	15.66	21.56	50.84	4.35	5.8	20.73	34.93	4.51	6.24	6.24	26.85	4.26	5.29	16.34	28.09	27.08	43.57	101.85	37.7	41.83	33.16	13.88	67.44	4.37	8.63	3451.93	3403.91	117.51	115.91
435.478	2616.75	97.78	50.87	36.28	41.89	35.89	5.79	15.82	21.96	50.98	4.34	5.8	21.83	35.95	4.36	6.31	6.26	26.29	4.32	5.35	16.56	26.69	27.08	43.25	100.89	38.78	41.26	32.93	14.34	68.34	4.72	8.83	3468.17	3419.39	117.29	116.58
435.836	2687.97	97.76	52.3	37.15	40.31	35.81	5.58	15.84	20.92	51.58	4.3	5.78	21.41	35.03	4.22	5.93	5.8	26.15	4.08	5.25	14.9	26.53	27.22	43.4	101.63	37.66	41.73	32.88	13.62	69.9	4.43	8.73	3514.23	3466.45	118.34	117.44
436.194	2815.19	101.02	53.47	37.48	41.05	37.53	5.55	15.89	20.38	53.12	4.18	5.8	21.79	36.97	4.25	6.27	6.2	28.13	4.21	5.19	16.74	28.47	27.14	43.21	102.55	38.38	41.64	33.11	15.5	72.12	4.35	8.69	3627.35	3582.05	118.87	117.59
436.551	2806.47	99.78	54.92	38.29	41.01	38.03	5.69	15.76	21.98	53.24	4.34	5.83	21.11	36.95	4.38	6.14	6.32	26.61	4.33	5.25	17.12	27.63	27.33	43.44	99.53	38.12	41.91	33.06	13.98	71.38	4.35	8.63	3582.31	3527.95	118.86	118.5
436.909	2910.91	102.82	55.83	38.43	40.01	38.23	5.77	15.68	20.44	53.92	4.36	5.97	20.57	36.71	4.4	6.31	6.26	28.43	4.36	5.34	16.16	28.95	27.01	43.32	99.87	39.84	41.83	32.84	14.2	73.82	4.47	8.9	3659.15	3618.57	118.9	118.3
437.267	2854.37	98.98	57.55	39.46	38.57	35.23	5.55	15.73	20.1	52.28	4.36	5.97	20.17	35.85	4.26	6.31	6.48	27.67	4.5	5.33	15.86	27.31	27.33	43.62	95.51	38.76	42.17	33.09	13.74	72.12	4.31	8.63	3547.93	3504.57	120.11	119.87
437.625	2908.61	99.16	58.26	39.84	39.17	36.79	5.47	15.39	20.54	53	4.26	5.72	20.03	36.49	4.39	6.23	6.44	27.87	4.21	5.23	16.32	27.45	27.29	43.91	94.69	39.04	42.05	32.75	14.2	74.12	4.35	8.63	3573.51	3535.39	120.75	120.42
437.983	3169.49	106.42	59.92	40.57	38.77	37.53	5.45	15.52	20.54	55.5	4.46	5.96	20.85	39.37	4.51	6.44	6.64	28.95	4.38	5.43	16.32	28.67	27.26	43.51	99.49	41.18	42.39	32.88	14.6	78.5	4.56	8.78	3840.73	3798.23	120.68	120.34
438.34	2982.87	103.06	61.28	41.21	39.43	38.69	5.55	15.58	21.78	55.74	4.65	6.05	21.61	38.89	4.66	6.45	9.36	30.25	4.43	5.47	18.18	30.21	27.49	43.69	95.67	40.16	42.57	32.82	16.96	76.32	4.56	8.9	3581.07	3537.91	120.74	120.72
438.698	3101.65	103.56	61.8	41.45	36.47	36.51	5.61	15.54	18.2	53.98	4.35	5.72	18.75	37.01	4.54	6.11	6.42	27.85	4.56	5.37	15.2	28.67	27	43.49	93.59	38.36	42.12	32.36	13.38	76.36	4.46	8.91	3677.97	3638.49	121.25	120.32
439.056	3102.35	101.04	63.31	42	36.05	35.23	5.5	15.47	18.6	53.08	4.58	5.77	18.69	36.35	4.59	6.12	5.52	27.11	4.37	5.35	16	27.85	27.4	43.6	91.87	38.32	42.42	32.73	13.34	75.54	4.48	8.8	3633.95	3593.49	121.38	121.39
439.413	3168.59	101.76	64.84	42.55	34.41	35.35	5.48	15.53	17.9	53.56	4.44	5.87	18.67	35.77	4.5	5.92	5.72	27.51	4.28	5.23	15.58	26.59	27.38	43.68	89.27	37.44	42.17	32.36	12.68	76.6	4.45	8.86	3665.11	3631.11	122.06	121.97
439.771	3375.71	107.3	65.15	42.92	36.23	36.91	5.41	15.38	19.24	55.42	4.39	5.79	18.75	38.95	4.18	6.07	5.64	30.35	4.16	5.24	14.98	27.59	27.17	43.37	93.99	39.68	42.23	32.18	13.2	81.14	4.23	8.65	3861.71	3829.07	121.58	121.79
440.128	3197.01	100.54	66.33	43.68	33.19	33.89	5.43	15.57	17.8	52.1	4.42	5.96	17.29	36.59	4.39	6.28	5.88	28.61	4.22	5.41	14.92	26.21	27.34	43.91	86.69	36.32	42.53	32.19	12.28	77.64	4.32	9	3628.25	3592.47	121.8	121.55
440.486	3323.45	104.12	67.53	44.01	34.11	35.13	5.43	15.27	17.48	53.34	4.26	5.8	18.27	38.09	4.32	6.08	7.12	29.29	4.04	5.11	15.4	27.15	27.01	43.46	87.39	37.82	42.47	31.71	13.2	79.88	4.17	8.74	3722.61	3688.09	122.59	122.2
440.843	3462.05	107.48	68.23	44.26	33.73	36.33	5.1	15.02	18.08	55.44	4.3	5.59	17.65	38.83	4.19	5.93	6.32	30.37	3.94	5.15	15.64	27.79	27.12	43.36	88.89	37.48	41.79	31.52	12.84	82.98	4.22	8.65	3832.17	3798.47	121.94	121.73
441.2	3455.05	106.36	69.7	45.09	32.71	35.95	5.4	15.39	17.82	54.36	4.4	5.9	18.33	38.71	4.41	6.25	7.08	29.75	4.44	5.16	15.3	27.81	27.23	43.75	87.37	38.84	42.2	31.91	13.54	83.84	4.58	8.99	3787.67	3757.63	122.06	122.64
441.558	3413.47	103.9	71.33	45.69	32.13	35.79	5.32	15.46	16.52	54	4.34	5.68	17.39	36.85	4.38	6.14	5.64	28.87	4.26	5.16	15.32	26.77	27.13	43.69	83.75	36.44	42.38	31.81	12.36	82.64	4.24	8.77	3704.89	3669.21	122.88	122.83
441.915	3545.35	107.26	70.94	45.78	32.53	35.49	5.28	14.85	17.46	55.14	4.2	5.75	16.83	39.03	4.26	6.07	6.22	29.87	4.13	5.22	15.82	26.73	26.85	43.56	84.31	37.42	42.2	31.56	12.48	86.22	4.44	8.78	3810.93	3782.91	122.19	122.54
442.272	3491.83	103.74	72.5	46.15	31.25	34.53	5.22	15.19	17	56.04	4.43	5.83	15.83	37.73	4.32	6.1	5.6	29.25	4.53	5.35	14.42	26.39	26.82	43.79	82.65	36.78	42.24	31.34	12.1	84.48	4.3	8.79	3718.91	3688.27	122.22	122.88
442.629	3440.59	101.94	73.16	46.77	29.87	34.63	5.28	15.08	17.4	55.08	4.18	5.66	17.37	36.91	4.46	6.24	6.12	29.91	4.47	5.35	15.06	26.61	27	43.78	81.13	35.18	42.14	31.15	12.12	84.4	4.25	8.85	3627.13	3598.21	122.65	123.02
442.987	3506.27	102.22	74.29	47.84	29.85	33.93	5.2	15.18	16.04	54.16	4.2	5.88	15.99	38.15	4.37	6.1	5.82	28.77	4.3	5.33	15.22	26.59	26.85	43.87	79.63	35.4	42.33	31.25	12.16	85.22	4.29	8.98	3660.73	3637.67	122.66	123.35
443.344	3567.63	104.88	74.86	48.14	29.39	33.97	5.15	15.03	16.26	54.38	4.45	5.76	16.37	38.13	4.41	6.23	6.58	30.05	4.29	5.15	14.68	27.09	26.82	43.89	79.33	36.22	42.04	31.15	12.22	87.32	4.39	8.93	3695.11	3675.79	122.43	123.29
443.701	3579.23	102.74	75.63	48.18	29.09	33.85	5.39	15.07	15.6	54.7	4.37	5.92	15.99	39.03	4.46	6.12	5.66	30.49	4.34	5.34	14.78	27.03	26.9	43.99	77.41	35.86	42.08	31.2	11.68	88.7	4.58	9.04	3671.85	3646.89	122.69	122.87
444.058	3561.63	104.48	76.7	48.58	30.95	35.95	5.25	15.1	17.38	56.8	4.37	5.64	17.47	39.89	4.29	6	7.26	31.91	4.33	5.37	16.12	28.51	26.56	43.75	79.37	37.02	41.5	30.87	13.72	90.7	4.41	9.16	3625.91	3596.81	122.19	123.15
444.415	3492.69	100.36	76.89	49.37	29.53	32.93	5.29	15.03	15.3	52.94	4.23	5.76	15.13	37.81	4.34	5.9	5.12	29.69	4.45	5.37	13.8	26.33	26.46	43.85	75.01	34.84	41.56	30.76	12.12	88.98	4.43	9.09	3521.79	3500.69	122.22	122.81
444.772	3588.07	101.86	77.42	49.26	27.49	32.83	5.39	15.27	15.14	55.28	4.46	6.05	14.43	37.15	4.53	6.23	5.42	30.55	4.44	5.48	14	26.45	26.57	44.14	75.23	34.22	41.71	30.4	11.16	90.34	4.44	9.33	3597.13	3567.39	122.46	122.93
445.129	3464.97	96.52	77.82	49.43	26.91	31.81	5.22	14.67	14.26	51.88	4.1	5.66	13.67	36.81	4.36	5.94	6.54	30.01	4.23	5.11	12.94	25.39	26.07	43.62	71.39	31.8	41.56	30.23	11.32	88.04	4.32	9.03	3436.77	3415.93	121.76	122.85
445.486	3685.53	103.2	78.55	49.88	27.51	34.01	5.37	14.69	14.48	55.74	4.21	5.85	14.91	38.33	4.28	6.07	5.72	31.85	4.28	5.33	13.66	25.97	25.84	43.93	74.39	33.94	41.24	30.06	11.52	95.02	4.41	9.01	3632.75	3605.49	121.35	122.26
445.843	3706.41	102.78	78.77	49.86	28.05	32.85	5.05	14.72	14.62	55.42	4.17	5.67	15.01	38.39	4.36	5.92	5.02	32.15	4.23	5.26	13.02	26.99	25.64	43.87	74.15	33.5	40.89	30.14	11.62	95.92	4.2	8.94	3619.55	3602.85	121.18	121.86
446.199	3578.71	98.64	79.7	50.27	27.01	31.97	5.06	14.68	13.9	54.84	4.22	5.65	14.17	37.57	4.23	5.89	5.62	31.05	4.08	5.4	13.18	25.75	25.89	44.07	70.51	32.82	40.94	29.94	11.7	92.26	4.1	9.14	3464.47	3445.91	121.09	122.02
446.556	3708.69	102.8	80.22	50.52	27.55	34.29	4.96	14.67	16.46	57.66	4.23	5.65	16.71	39.67	4.21	5.86	6.34	32.79	4.16	5.19	14.7	27.39	25.36	43.75	72.95	34.02	40.52	29.83	11.8	98.36	4.13	9.04	3575.43	3546.73	121.25	122.31
446.913	3679.89	100.6	80.04	50.79	27.27	32.43	5.3	14.6	13.7	56.58	4.05	5.55	14.83	39.59	4.16	6.06	6.6	32.57	4.07	5.17	13.08	26.63	25.29	43.85	71.69	32.66	40.41	29.84	11.38	97.86	4.49	9.15	3512.77	3491.13	120.5	121.45
447.27	3659.95	100.42	80.66	51.27	26.83	33.15	4.97	14.49	14.72	55	4.12	5.51	14.17	38.99	4.02	5.85	5.78	32.23	4.03	4.93	13.58	25.71	25.13	43.91	69.21	31.98	40.14	29.43	11.62	100.2	4.1	8.92	3466.45	3449.17	120.95	121.5
447.626	3679.39	101.76	81.47	51.76	29.49	36.05	5.15	14.59	17.66	58.84	4.37	5.76	18.35	41.01	4.4	6.23	9.2	34.91	4.37	5.21	15.94	29.17	25.33	44.56	71.07	35.54	40.2	29.43	14.42	104.9	4.33	9.2	3454.25	3434.67	121.17	122.2
447.983	3657.11	99.64	81.53	51.84	26.89	33.61	5.31	14.52	16.22	57.22	4.4	5.62	15.35	40.01	4.46	6.14	7.04	34.05	4.26	5.26	14.2	26.67	24.84	44.02	69.53	33.38	39.74	29.37	12.52	102.3	4.41	9.19	3416.61	3392.91	120.26	120.76
448.339	3680.95	99.18	81.31	51.79	26.35	32.07	4.95	14.35	14.8	56.6	4.32	5.5	14.75	39.41	4.14	5.78	5.9	33.27	4.24	5.11	13.02	25.29	24.67	43.75	67.93	31.5	39.2	28.92	9.98	103.98	4.3	9.03	3410.87	3391.75	119.41	119.87
448.696	3654.63	98.02	81.87	52.19	26.61	32.47	5.17	14.43	15.24	56.88	4.22	5.78	14.13	41.19	4.29	6.07	5.74	32.95	4.32	5.4	12.72	25.61	24.4	44.12	66.29	31.28	39	28.82	10.5	104.08	4.26	9.24	3360.99	3344.17	119.61	120.21
449.052	3868.39	103.84	82.49	52.21	26.99	33.41	4.95	14.17	14.82	60.84	4.12	5.54	14.57	42.85	4.08	5.73	6.24	35.27	4.1	5.1	12.92	27.49	24.14	43.78	70.67	32.56	38.78	28.71	12.48	111.74	4.13	9.15	3538.77	3517.83	119.05	120.24
449.409	3922.17	104.4	82.65	52.38	27.31	34.07	5.07	14.29	15.3	60.52	4.17	5.72	14.83	44.05	4.23	5.93	5.78	34.91	4.24	5.24	12.9	27.47	24.02	43.83	70.45	31.72	38.53	28.46	10.88	115.22	4.3	9.13	3565.21	3545.45	119.13	119.83
449.765	3778.45	100.44	82.52	52.36	26.37	32.17	4.96	14.15	14.18	59.62	4.2	5.65	14.73	42.19	4.21	5.83	5.68	34.43	4.19	5.34	11.48	26.01	23.66	43.84	66.93	31.44	38.46	28.31	11.28	111.78	4.24	9.29	3407.45	3389.79	118.55	118.94
450.122	3820.05	100.9	82.8	52.86	27.11	32.73	4.82	14.22	14.24	59.38	4.25	5.65	14.41	41.19	4.13	5.86	6.04	36.75	4.26	5.32	11.52	26.89	23.7	43.9	67.91	31.12	38.24	28.12	10.64	117.34	4.35	9.15	3428.79	3408.65	118.97	119.5
450.478	3826.27	102.46	82.92	53.13	27.61	34.17	4.91	14.22	15.24	60.96	4.27	5.57	15.29	43.25	4.32	5.94	7.64	37.17	4.25	5.3	13.02	27.47	23.43	43.78	67.31	30.94	37.77	27.98	11.68	118.92	4.36	9.24	3408.91	3390.03	118.29	118.53
450.834	3855.39	101.36	83.21	53.29	25.79	32.87	4.95	14.25	14.78	61.14	4.24	5.66	14.85	42.89	4.17	5.92	6.26	37.95	4.33	5.26	12.92	27.23	23.17	43.93	66.61	30.14	37.21	28.02	11.92	119.74	4.34	9.31	3408.23	3392.61	117.51	118.6
451.191	3678.47	95.92	83.08	53.36	24.55	31.79	4.83	14.07	14.1	60.1	4.13	5.44	14.59	41.63	4.15	5.79	6.58	35.81	4.21	5.31	11.38	25.39	22.74	43.83	62.71	30.12	37	27.73	10.96	117	4.08	9.29	3229.39	3213.23	117.42	118.05
451.547	3712.85	96.42	83.16	53.61	25.57	31.79	5.21	14.01	13.06	60	4.2	5.51	14.07	40.83	4.18	5.95	5.94	36.77	4.15	5.33	11.54	26.27	22.79	43.9	64.13	28.38	36.59	27.59	11.5	119.82	4.32	9.36	3245.69	3229.63	117	117.83
451.903	3696.47	95.78	82.97	53.61	24.59	32.23	5.01	14.21	13.78	60.24	4.3	5.74	13.67	42.91	4.25	5.98	6.58	36.53	4.31	5.49	10.74	26.71	22.45	43.89	63.79	28.42	36.16	27.29	11.54	122.8	4.25	9.68	3209.03	3198.27	116.61	117.4
452.259	3721.93	96.72	83.52	53.7	26.07	31.91	5.02	13.95	14.2	60.78	4.3	5.63	14.47	43.33	4.19	5.83	6.6	37.31	4.19	5.37	11.52	26.13	22.06	43.65	63.23	29.84	35.88	27.2	12.22	125.12	4.04	9.44	3220.71	3202.77	116.51	117.07
452.615	3769.27	97.56	83.29	53.58	25.35	32.53	4.75	13.6	14.1	61.68	4.01	5.42	15.09	44.25	4.06	5.76	6.28	38.79	4.01	5.16	11.64	25.41	21.74	43.69	62.63	29.34	35.28	26.67	11.82	129.66	4.14	9.38	3245.09	3231.17	116.39	116.99
452.971	3906.13	102.04	83.3	53.74	26.81	33.55	4.71	13.72	16.12	65.24	4.07	5.41	14.83	45.67	3.89	5.74	6.64	39.97	4.02	5.15	12.36	27.59	21.5	43.57	65.19	30.42	34.9	26.6	12.08	137.74	4.16	9.29	3354.09	3335.09	115.63	116.62
453.327	3737.79	95.38	83.56	54.32	25.49	31.17	4.7	13.66	15.14	62.48	4.03	5.4	14.25	44.45	4.14	5.76	5.9	38.81	4.12	5.16	10.46	26.75	21.24	43.73	62.51	28.74	34.81	26.79	11.56	134.22	3.92	9.42	3189.43	3177.05	115.92	116.36
453.683	3718.37	95	83.66	54.32	25.61	31.45	4.78	13.75	14.8	62.64	4.22	5.71	13.99	45.51	4.17	5.96	5.64	39.95	4.18	5.24	11.24	25.79	21.1	43.56	61.39	27.92	34.21	26.34	11.94	136.22	4.29	9.69	3164.63	3144.25	114.97	115.41
454.039	3748.79	95.28	83.76	54.71	24.79	32.61	4.83	13.99	14.5	64.64	4.18	5.7	13.29	45.05	4.34	5.97	5.9	39.65	4.22	5.37	10.18	25.77	20.94	43.9	60.85	28.36	33.98	26.24	11.62	140.14	4.23	9.7	3179.67	3164.31	115.18	115.8
454.395	3725.93	95.18	83.51	54.45	25.49	31.99	4.87	13.85	14.54	64.18	4.07	5.72	13.47	45.83	4.28	5.96	6.52	41.89	4.38	5.51	10.88	25.49	20.54	43.74	60.89	28.68	33.51	26.11	12.54	140.54	4.44	9.78	3148.91	3135.09	114.43	114.91
454.751	3784.23	95.58	83.52	54.34	26.23	31.33	4.87	13.74	14.74	66.08	4.12	5.61	14.07	46.25	4.21	5.78	6.28	42.89	4.34	5.35	11.02	26.53	20.26	43.59	60.87	28.2	33.07	26.06	11.96	146.66	4.14	9.72	3188.57	3170.49	114.41	114.98
455.107	3855.59	98.96	83.17	54.65	25.19	33.63	4.78	13.7	14.1	67.14	4.07	5.64	14.27	47.77	4.07	5.98	6.38	43.29	4.15	5.36	10.46	26.89	19.96	43.37	61.87	27.64	32.65	25.67	11.4	154.1	4.16	10	3250.91	3234.75	113.65	114.23
455.463	3775.17	95.46	83.17	54.7	25.87	32.85	4.81	13.82	15.3	67	4.06	5.46	14.47	46.33	4.23	5.99	7.16	44.41	4.11	5.45	10.04	25.99	19.9	43.54	59.75	27.44	32.4	25.59	12.28	153.44	4.3	9.93	3177.71	3153.93	113.82	114.21
455.818	3863.47	98.64	83.2	55.02	26.91	34.63	4.91	13.7	14.66	69.16	4.12	5.78	14.65	48.49	4.11	6.05	6.46	45.69	4.17	5.41	10.88	27.49	19.59	43.35	61.45	28.28	31.8	25.59	11.62	159.92	4.29	9.99	3247.83	3232.31	113.72	114.15
456.174	3750.07	94.66	82.62	54.87	26.39	33.77	4.81	13.53	15.56	68.78	4.06	5.9	15.11	47.79	4.29	5.89	6.72	44.69	4.22	5.66	10.1	26.85	19.2	43.26	59.03	28	31.13	25.28	11.24	159.9	4.38	10.11	3147.53	3130.89	112.91	113.22
456.53	3788.11	95.28	82.73	55.01	26.93	33.65	4.84	13.57	14.66	69.82	4.16	5.71	14.57	48.93	4.01	5.92	6.36	46.57	4.18	5.57	10.74	26.89	18.91	43.22	59.37	27.66	30.78	25.06	12.06	164.72	4.22	9.93	3175.03	3161.65	113.14	113.66
456.885	3795.49	95.52	82.6	54.92	26.07	33.09	4.81	13.4	15.52	71.48	3.98	5.48	15.79	50.13	4.08	5.78	6.48	47.63	4.2	5.27	10.62	27.21	18.49	43.2	58.93	28.9	30.66	24.72	11.74	170.12	4.12	9.98	3183.55	3164.11	112.78	112.99
457.241	3764.45	95.02	82.74	55.03	26.25	33.61	4.63	13.44	14.78	70.7	4.04	5.48	14.71	50.17	4	6	6.28	46.73	4.14	5.28	10.28	26.83	18.32	43.19	58.15	28.1	30.23	24.66	12.36	173.54	4.13	10.16	3155.39	3141.47	112.3	112.95
457.596	3670.47	91.74	82.38	55.21	25.67	33.77	4.58	13.23	14.8	70.72	4.02	5.64	15.61	49.83	4.03	5.87	6.52	47.61	4.23	5.51	10.58	27.03	18.13	43.16	57.07	28.14	29.74	24.2	13.16	172.28	4.07	10.12	3074.67	3057.45	112	112.47
457.952	3800.11	95.08	82.55	55.23	27.21	32.79	4.66	13.25	14.68	73.26	3.95	5.6	14.93	52.23	3.99	5.84	6.04	49.01	4.14	5.33	10.5	27.05	17.78	43.03	57.87	27.52	29.42	24.27	12.4	183.46	4.01	10.02	3193.97	3175.29	112.04	112.79
458.307	3613.07	91.4	82.49	55.32	24.79	33.55	4.74	13.36	15.34	71.04	4.12	5.66	14.87	49.99	4.08	5.76	5.42	48.93	4.22	5.41	9.6	25.79	17.65	43.05	54.99	26.66	28.87	24.1	12.66	179.12	4.11	10.26	3040.15	3017.97	111.96	112.53
458.663	3758.95	94.06	82.02	55.4	26.35	33.01	4.77	13.27	15.16	74.48	4.02	5.65	15.47	53.31	3.98	5.92	5.6	50.75	4.27	5.41	10.08	26.95	17.5	42.9	56.83	26.82	28.57	23.81	13.58	191.36	4.16	10.27	3169.07	3144.15	112	112.14
459.018	3804.93	94.9	81.8	55.54	26.83	33.77	4.78	13.21	16.76	76.08	4.19	5.71	15.75	54.17	4.09	5.83	6.78	53.89	4.26	5.55	10.62	27.05	16.95	42.68	58.73	27.74	28.18	23.81	12.82	197.7	4.17	10.51	3217.17	3195.43	111.05	111.5
459.373	3670.09	91.86	81.91	55.76	25.43	32.95	4.51	13.03	14.16	75.44	4.03	5.56	13.53	51.79	4.07	5.86	6.44	52.65	4.13	5.63	9.66	25.81	16.75	42.72	55.59	26.06	27.86	23.57	13.4	196.18	4.2	10.45	3105.71	3085.11	111.27	111.58
459.729	3622.21	91.32	81.84	55.68	24.69	33.71	4.74	13.12	15.86	75.1	4.01	5.52	15.51	52.85	3.95	5.92	6.82	53.87	4.12	5.66	9.9	26.67	16.58	42.83	54.21	25.7	27.65	23.4	12.92	199.74	4.15	10.66	3071.25	3052.15	111.29	111.77
460.084	3609.97	91.48	81.49	55.66	25.09	33.37	4.73	13.05	14.74	76.54	4.03	5.69	14.95	53.07	4	5.9	6.72	53.77	4.08	5.53	9.56	26.91	16.38	42.68	53.25	26.54	27	23.07	13.16	205.22	4.24	10.59	3064.75	3046.45	110.5	111.03
460.439	3763.71	94.4	81.41	55.84	26.61	35.83	4.67	13.18	16.18	80.32	4.08	5.69	15.49	56.77	4.03	5.92	7.1	58.07	4.12	5.83	9.6	27.61	15.97	42.54	55.37	27.04	26.48	23.03	12.48	217.94	4.23	10.72	3213.97	3192.99	110.51	111.23
460.794	3589.29	89.88	81.79	56.35	26.19	34.21	4.59	13.18	15.34	78.76	4.13	5.73	16.07	54.71	4.08	6.01	6.8	57.91	4.21	5.7	9.4	26.21	15.88	42.35	53.13	26.34	26.44	22.87	13.16	214.02	4.18	10.9	3075.91	3050.39	111.03	111.02
461.15	3529.31	88.22	81.52	56.17	26.01	33.03	4.89	13.05	15.02	77.82	4.05	5.91	14.65	54.25	4.19	6.04	7.04	57.23	4.31	5.97	8.36	26.11	15.78	42.61	50.89	25.9	26.26	22.8	13.36	217.02	4.36	11.04	3025.67	3004.31	110.88	111.17
461.505	3708.65	92	81.18	56.19	26.49	34.77	4.61	12.93	15.44	82.66	3.99	5.51	16.11	58.45	3.85	5.85	7	61.41	4.13	5.61	9.5	27.49	15.34	42.01	53.27	26.58	25.57	22.14	13.46	235.48	4.15	10.9	3202.27	3180.39	110.15	110.98
461.86	3458.29	84.82	81.13	56.43	24.95	33.81	4.62	12.8	15.24	78.62	4.02	5.74	14.49	54.45	4.08	6	7.42	58.83	4.31	5.79	8.82	24.23	15.26	42.22	49.93	25.82	25.31	22.19	13.5	224.5	4.11	11.17	2985.73	2968.81	110.17	110.3
462.215	3577.91	88.3	81.2	56.58	25.21	32.77	4.66	12.75	14.84	83.48	4	5.8	14.71	57.37	4.02	5.97	7.1	60.99	4.27	5.73	8.56	26.23	14.82	42.25	52.11	25.46	24.85	21.98	12.88	239.08	4.06	11.11	3106.79	3086.61	110.02	110.5
462.57	3511.49	87.4	80.82	56.32	24.77	33.63	4.6	12.84	14.5	82.84	3.9	5.74	14.53	57.09	3.96	5.93	7.62	62.69	4.23	5.84	9.36	25.39	14.76	41.99	49.65	25.56	24.39	21.65	12.9	240.82	4.08	11.19	3059.25	3038.59	109.63	109.97
462.925	3576.15	89.24	80.83	56.52	26.31	35.51	4.73	12.71	14.98	86.3	4.02	5.75	15.39	59.13	3.88	5.87	6.92	65.65	4.25	5.79	8.7	27.21	14.36	42.09	50.13	25.42	24.16	21.41	13.1	253.92	4.09	11.36	3138.81	3115.51	109.73	110.15
463.28	3424.57	85.4	80.6	56.56	25.43	33.03	4.44	12.53	14.6	83.3	3.9	5.73	14.65	57.45	3.97	5.9	6.98	64.47	4.31	5.8	8.8	25.63	14.17	41.68	47.59	25.52	23.91	21.49	13.58	249.94	3.99	11.47	3011.13	2990.13	110.26	110.24
463.634	3378.81	84.22	80.1	56.35	24.91	33.13	4.52	12.53	15.2	83.62	3.98	5.81	14.37	58.49	4.08	6.03	7.66	66.27	4.22	6.04	9.14	26.19	14.03	41.4	47.21	25.46	23.59	21.16	13.6	253.72	4.04	11.57	2986.03	2965.87	109.06	109.96
463.989	3295.67	81.54	79.92	56.34	24.05	31.85	4.73	12.7	14.46	84.1	4.02	5.75	13.97	57.53	4.1	6.09	8.1	66.67	4.31	6.04	8.62	25.81	13.74	41.47	46.15	24.3	23.16	20.99	13.78	255.4	4.11	11.82	2928.23	2906.59	108.77	109.1
464.344	3375.87	84.32	79.93	56.46	24.53	32.83	4.64	12.58	14.52	87.22	4.04	5.77	14.13	59.55	4.1	6.07	8.24	71.01	4.34	6.09	8.1	25.57	13.49	41.37	45.39	24.94	22.93	20.92	14.04	269.24	4.21	11.93	3011.67	2993.83	108.83	109.17
464.699	3306.19	82.22	79.84	56.59	24.23	33.27	4.51	12.58	15.3	86.8	3.94	5.63	14.75	60.03	3.91	5.99	7.92	70.77	4.34	6.01	8.16	25.31	13.2	41.41	45.25	24.44	22.53	20.61	13.68	272.92	4.11	11.97	2966.21	2947.67	109.04	109.5
465.053	3180.73	80.12	79.39	56.79	22.99	32.23	4.46	12.43	13.56	85.6	3.93	5.74	14.77	58.11	4.06	5.94	8.08	70.09	4.39	6.14	8.16	24.29	12.88	41.32	42.85	23.2	22.34	20.34	14.74	270.52	4.21	12.12	2868.95	2849.85	109.11	109.3
465.408	3199.83	79.12	79.42	56.83	23.13	31.97	4.61	12.59	14.52	87.56	3.93	5.74	14.05	59.43	3.9	5.97	8.14	73.39	4.3	6.09	8.32	24.69	12.79	41.03	43.27	23.46	21.9	20.36	13.9	280.34	4.22	12.24	2900.77	2881.35	108.52	109.07
465.763	3205.99	79.82	79.61	57.19	23.83	32.09	4.48	12.41	13.98	89.64	4.02	5.82	14.47	61.13	4.05	5.97	8.7	75.17	4.32	6.16	8.58	24.83	12.67	41.14	43.03	23.38	21.63	20.08	13.74	290.66	4.13	12.41	2923.93	2906.77	109.19	109.55
466.117	3138.19	78.66	79.24	56.93	22.81	31.69	4.56	12.32	14.62	89.16	3.97	5.85	14.27	61.39	3.98	6.02	8.1	75.73	4.38	6.33	7.9	24.51	12.46	41.01	40.63	22.24	21.29	19.88	14.9	294.22	4.11	12.58	2879.37	2862.51	108.47	108.82
466.472	3116.05	78.02	79.03	56.9	22.29	32.01	4.59	12.21	13.84	91.12	4.04	5.92	14.43	61.39	4.02	6.12	8.08	77.91	4.33	6.27	7.36	25.09	12.1	40.66	40.37	22.88	21.07	19.63	14.42	301.6	4.15	12.67	2875.13	2855.41	108.29	109.13
466.826	3043.03	76.9	78.97	56.97	22.99	31.57	4.54	12.36	15.26	91.48	4.01	5.87	14.75	62.01	4.02	6.08	9.2	78.99	4.43	6.52	7.82	24.37	12.05	40.56	39.41	23.96	20.85	19.57	15.2	305.18	4.24	12.83	2828.67	2806.23	108.41	108.83
467.181	3040.17	76.26	78.71	57.27	23.15	31.87	4.71	12.36	14.98	92.52	4.11	5.92	14.53	62.27	3.99	6.17	8.46	81.85	4.62	6.61	8.48	24.35	11.79	40.73	39.47	23.04	20.66	19.24	15.46	314.88	4.32	13.2	2832.59	2817.27	108.75	108.94
467.535	2925.61	73.12	78.45	56.97	21.69	30.99	4.59	12.22	14.1	91.32	4.01	6.05	13.25	61.67	4.02	6.12	8.48	80.65	4.5	6.69	7.98	22.65	11.71	40.65	36.57	22.04	20.16	19.17	14.46	313.7	4.29	13.44	2750.81	2734.87	108.51	108.73
467.89	3079.97	76.96	78.56	57.16	22.87	31.75	4.71	12.19	14.12	98	3.98	6	13.25	65.35	4.07	6.15	8.7	86.51	4.59	6.66	7.26	24.95	11.46	40.6	37.73	22.58	19.76	18.95	14.38	342.54	4.29	13.55	2908.19	2890.11	108.41	108.94
468.244	2970.35	75.3	77.98	56.96	22.59	32.19	4.46	11.91	14.98	96.7	3.99	5.8	14.27	65.95	3.98	6.04	10.1	89.55	4.4	6.57	7.94	24.29	11.09	40.31	37.71	22.36	19.54	18.66	14.7	342.86	4.15	13.54	2826.99	2807.23	108.04	108.46
468.598	2907.51	73.46	77.66	57.13	21.81	31.69	4.48	12.13	14.32	96.2	3.99	6.02	13.57	64.95	4.01	6.29	9.52	89.53	4.44	6.64	6.82	24.23	11.05	40.36	35.69	21.5	19.35	18.31	14.96	345.34	4.23	13.77	2786.33	2764.49	107.82	108.13
468.952	2878.53	73.12	77.53	56.97	21.97	31.55	4.6	12.01	13.24	97.74	4.13	5.98	13.67	65.61	4.08	6.16	9.7	91.73	4.51	6.78	6.9	23.85	10.67	39.95	34.99	21.5	18.99	18.2	14.74	354.34	4.19	14.05	2773.61	2756.29	107.86	108
469.307	2837.25	72.14	77.52	56.93	20.61	30.61	4.51	12.07	13.62	99.08	4.02	6.03	13.39	65.03	4.04	6.23	9.92	93.41	4.6	6.92	7.96	23.75	10.56	39.95	35.15	21.2	18.74	18.07	15.32	363.08	4.21	14.26	2746.41	2732.27	107.69	108.41
469.661	2876.13	73.48	77.09	57.03	21.67	32.23	4.58	11.9	14.58	102.7	3.95	6.08	14.25	68.01	3.94	6.17	9.98	100.45	4.66	7.02	7.64	24.45	10.46	39.84	34.25	21.92	18.4	17.86	15.7	381.3	4.25	14.37	2796.83	2787.01	107.41	107.72
470.015	2794.49	71.48	76.7	56.88	20.31	30.77	4.54	11.92	14.08	102	4.03	6.12	13.25	66.93	4.03	6.2	10.72	100.63	4.75	7.09	6.96	23.33	10.32	39.55	32.09	21.16	18.09	17.68	16.06	381.94	4.27	14.72	2736.75	2721.63	107.39	107.76
470.369	2858.31	73.7	76.58	57.06	21.03	31.81	4.47	11.95	14.76	107.04	4.09	6.15	13.75	70.47	4.16	6.39	11.56	106.63	4.63	7.14	6.82	23.55	10.11	39.53	33.77	20.52	17.82	17.57	16.4	407.76	4.33	14.88	2822.39	2811.49	107.34	107.7
470.723	2809.27	72.12	76.76	57.23	20.21	30.47	4.46	11.91	14.52	108.46	4.05	6	13.47	70.73	4.01	6.48	11.1	108.19	4.61	7.2	7.28	23.19	10	39.35	31.69	21.18	17.6	17.46	16.44	414.74	4.19	15.09	2791.35	2773.41	107.5	107.89
471.077	2794.89	71.14	75.87	56.73	21.15	31.31	4.53	11.88	14.58	111.32	4.03	6.08	12.83	72.97	4.02	6.37	11.46	112.95	4.72	7.29	7.78	23.79	9.84	39.29	32.65	21.08	17.18	17.11	16.82	431.16	4.32	15.51	2797.83	2789.27	106.85	107.02
471.431	2769.03	70.76	76.01	57.11	21.09	30.63	4.45	11.77	14.1	111.66	4	6.08	13.71	71.73	4.05	6.43	12.08	116.29	4.78	7.36	6.26	23.93	9.63	39.42	31.53	20.8	16.93	17	17.1	443.58	4.23	15.64	2784.51	2773.07	107.24	107.19
471.785	2721.31	70.58	75.76	57.1	20.73	31.53	4.52	11.88	15.2	112.98	4.02	6.23	14.19	73.31	4.02	6.37	12.94	119.67	4.86	7.63	7.28	23.51	9.43	39.35	30.95	21.16	16.73	16.82	18.38	454.64	4.24	16.05	2753.77	2740.27	107.07	107.27
472.139	2712.43	68.4	75.57	56.93	20.25	30.45	4.52	11.72	14.68	115.12	3.93	6.28	13.91	73.69	3.97	6.3	11.16	122.33	4.91	7.73	6.76	23.75	9.26	39.01	30.13	20.52	16.44	16.56	17.38	468.46	4.25	16.25	2757.73	2748.61	106.98	107.41
472.493	2647.35	67.74	75.01	56.63	19.67	29.91	4.51	11.73	14.68	116.04	3.98	6.32	13.13	74.59	3.91	6.4	12.7	124.63	4.87	7.84	7.34	22.77	9.14	38.83	29.01	21.26	16.04	16.39	18.24	477.06	4.4	16.64	2708.09	2699.97	106.24	106.55
472.846	2642.39	68.84	75.18	56.83	21.17	31.33	4.51	11.69	14.26	117.9	3.99	6.32	13.07	76.01	4.03	6.56	13.18	130.57	5.06	7.88	6.72	23.05	9.01	38.75	29.29	20.62	15.75	16.1	19.58	493.16	4.41	16.91	2724.17	2707.81	106.33	106.72
473.2	2630.27	68.26	74.92	56.86	20.41	30.69	4.5	11.63	14.34	121.78	3.95	6.36	13.81	76.91	3.96	6.55	14.2	133.67	5.03	8.03	7	23.73	8.8	38.84	28.61	20.18	15.59	15.98	19.52	511.82	4.33	17.07	2722.55	2707.57	106.6	106.96
473.554	2627.67	67.54	74.79	56.7	19.33	30.75	4.49	11.47	13.94	123.82	3.85	6.4	12.83	78.97	3.94	6.55	14.68	140.19	5.05	8.1	6.72	23.25	8.58	38.56	27.53	19.44	15.49	15.84	19.02	528.36	4.35	17.4	2736.81	2725.23	106.29	106.68
473.908	2611.79	67.86	74.17	56.64	18.97	31.63	4.46	11.53	14.82	126.08	3.97	6.34	14.13	80.35	3.89	6.51	14.66	145.61	5.09	8.32	6.3	23.83	8.57	38.31	27.07	20.24	15.03	15.55	19.76	549.36	4.33	17.62	2732.49	2721.81	106.09	105.87
474.261	2575.27	66.68	74.01	56.37	20.01	31.21	4.42	11.46	15.52	129.08	3.98	6.34	13.05	80.77	4.02	6.55	15.72	150.23	5.13	8.45	6.64	23.31	8.39	38.14	27.11	19.22	14.82	15.5	21.58	562.54	4.33	18.04	2711.55	2700.11	105.76	106.1
474.615	2524.41	66.32	73.73	56.37	19.77	30.79	4.48	11.55	15.18	128.94	3.96	6.45	13.79	80.37	3.94	6.74	16.06	153.43	5.3	8.6	6.46	23.79	8.2	38.13	26.11	18.36	14.51	15.19	21.98	575.86	4.44	18.64	2672.25	2664.07	105.85	106.07
474.968	2554.59	66.86	73.74	56.41	19.87	31.11	4.47	11.4	14.1	134.28	4.03	6.56	12.77	84.11	4.02	6.63	16.54	161.01	5.3	8.76	5.64	22.71	8.1	38.1	25.53	19	14.29	14.98	22.14	605.3	4.52	18.92	2719.53	2706.97	105.8	106.37
475.322	2458.73	67.62	73.49	56.13	21.33	32.61	4.52	11.39	17.2	135.98	3.99	6.51	16.67	85.27	3.96	6.75	19.56	165.69	5.39	8.91	9.04	25.25	7.96	38.1	27.11	21.72	14	14.89	25.34	610.84	4.58	19.33	2636.51	2622.67	105.4	105.92
475.675	2517.69	66.74	72.98	56.16	19.89	31.23	4.49	11.4	15.2	139.04	3.98	6.48	13.47	87.47	4.09	6.68	17.14	175.07	5.48	8.96	6.12	23.01	7.8	37.83	25.05	18.9	13.63	14.73	24.16	646.86	4.56	19.75	2707.25	2694.49	105.33	105.61
476.029	2528.19	66.56	72.74	56.21	20.59	31.03	4.46	11.42	15.36	144.08	3.98	6.57	13.53	90.63	4.08	6.68	18.92	182.67	5.62	9.34	6.24	23.85	7.7	37.62	25.47	18.84	13.34	14.51	25.66	678.54	4.54	20.19	2729.49	2722.13	105.31	105.5
476.382	2522.25	66.54	72.73	56.16	21.91	32.63	4.37	11.37	16.66	148.06	4.05	6.68	14.63	93.23	4.03	6.82	20.2	191.37	5.6	9.5	6.72	24.41	7.57	37.62	25.07	20.26	13.35	14.53	26.9	704.12	4.61	20.77	2734.53	2725.43	105.24	105.61
476.736	2513.77	66.62	72.44	55.85	21.05	31.81	4.46	11.29	16.04	151.6	3.98	6.76	14.33	94.57	3.96	6.97	20.9	198.29	5.76	9.76	7.12	24.03	7.48	37.69	24.55	19.6	12.92	14.36	27.46	734.02	4.68	21.21	2743.73	2731.79	104.9	105.46
477.089	2477.25	66.5	72.13	55.74	20.01	30.55	4.46	11.28	16.92	154.02	4.08	6.77	14.61	94.33	3.97	6.86	21.36	205.01	5.85	10.02	6.72	23.87	7.32	37.49	24.41	19.24	12.58	14.15	29.16	753.64	4.69	21.76	2718.63	2706.07	105.21	105.04
477.442	2475.49	65.36	71.74	55.85	20.29	31.81	4.53	11.21	16.28	158.64	4.01	6.86	14.01	97.71	4.02	7.06	21.6	213.25	5.93	10.22	6.74	24.23	7.28	37.34	23.63	18.72	12.38	13.95	30.4	783.48	4.78	22.27	2722.95	2714.37	104.85	105.39
477.795	2456.57	65.06	71.56	55.68	20.17	31.61	4.59	11.3	16.52	160.94	4.11	6.89	13.79	98.99	4.09	7.22	22.96	220.55	6.17	10.48	6.4	23.41	7.23	37.24	23.83	18.86	12.12	13.91	31.26	812.26	4.93	22.92	2719.71	2706.05	104.56	105.01
478.149	2435.33	64.04	71.47	55.94	19.89	31.57	4.57	11.21	15.82	163.64	4.03	6.93	13.95	101.01	3.95	7.2	25.14	229.21	6.16	10.63	6.62	23.45	7.09	37.28	22.65	18.94	11.91	13.64	33.04	838.32	4.86	23.46	2702.95	2695.65	104.95	104.98
478.502	2420.65	65.64	71.09	55.35	19.37	32.23	4.56	11.15	16.64	169.26	4.09	7.04	14.55	101.59	4.14	7.18	26.06	239.23	6.27	10.97	6.92	23.69	6.96	37.09	22.05	18.76	11.71	13.41	34.38	868.42	4.89	24.16	2696.61	2687.11	104.42	104.79
478.855	2391.09	65.26	70.74	55.5	20.45	31.49	4.5	11.13	17	170.38	4.08	7.04	15.15	103.61	4.03	7.39	27.72	247.33	6.42	11.15	6.32	23.11	6.83	36.93	22.87	18.64	11.37	13.35	34.8	894.8	4.97	24.63	2681.83	2666.01	104.12	104.52
479.208	2381.59	65.18	70.3	55.24	20.47	32.55	4.44	11.15	17.36	176.56	3.95	7.03	15.61	106.33	3.97	7.29	29.06	258.13	6.47	11.48	6.1	23.35	6.8	36.91	22.93	18.06	11.09	13.11	38.36	930.32	4.9	25.23	2674.47	2668.79	104.08	104.53
479.561	2380.73	65.06	70.3	55.37	20.59	32.53	4.53	11.17	17.26	181.6	4.06	7.13	15.75	108.35	4.13	7.39	30.06	269.91	6.67	11.82	6.3	23.59	6.64	36.86	22.05	17.94	10.9	12.98	38.66	969.1	5.05	26.09	2683.87	2679.01	104.05	104.48
479.914	2366.41	63.46	70.14	55.28	20.93	31.85	4.46	10.94	17.58	185.24	3.99	7.11	15.51	110.79	3.99	7.47	31	281.73	6.74	12.09	5.3	23.57	6.45	36.73	21.19	18.7	10.51	12.72	41	1002	5.01	26.6	2676.81	2671.21	104.01	104.28
480.267	2355.49	62.6	69.68	54.88	20.15	31.69	4.56	11	18.12	188.64	4.07	7.37	15.47	113.19	4.11	7.49	33.38	293.49	6.94	12.35	5.34	24.73	6.39	36.6	21.31	18.04	10.46	12.61	43.34	1045.66	5.1	27.31	2681.17	2672.77	103.77	104
480.62	2349.91	64.1	69.43	54.88	21.39	32.53	4.44	10.99	19.16	195.58	4.14	7.33	16.25	116.45	4.06	7.64	37.08	306.91	7.12	12.71	5.62	24.23	6.39	36.46	20.83	19.44	10.2	12.54	46.64	1085.6	5.19	28.04	2684.65	2679.85	103.4	103.7
480.973	2332.09	62.76	69.39	54.85	20.33	32.75	4.49	10.95	19.02	200.24	4.04	7.38	16.07	117.73	4.11	7.72	37.5	319.21	7.3	13.12	6.24	24.67	6.16	36.28	21.05	18.74	9.99	12.42	49.2	1123.36	5.28	28.74	2668.83	2660.27	103.41	103.81
481.326	2286.33	61.28	68.96	54.69	19.29	32.41	4.43	10.78	18.82	200.74	3.97	7.39	15.85	118.01	4.03	7.6	38.32	327.99	7.35	13.31	6.38	23.49	6.06	36.23	19.21	18.16	9.74	12.09	50.66	1150.4	5.33	29.48	2630.25	2621.53	103.4	103.35
481.678	2294.27	63.5	68.99	54.68	20.13	33.65	4.45	10.78	19.08	205.88	4.05	7.47	16.11	123.29	3.97	7.72	40.1	343.63	7.61	13.88	6.46	24.59	6.07	36.24	20.41	18.08	9.48	12.08	53.6	1197.24	5.44	30.48	2643.21	2634.83	103.08	103.69
482.031	2263.17	63.92	68.47	54.57	20.47	32.07	4.53	10.85	20.42	210.18	4.12	7.65	17.21	123.97	4.11	7.88	43.42	355.99	7.89	14.25	6.94	24.47	6.01	36.05	19.39	18.5	9.42	11.91	57	1232.86	5.66	31.46	2625.97	2610.95	102.9	103.5
482.384	2254.15	61.14	68.42	54.22	20.51	32.25	4.44	10.85	20.64	215.78	4.09	7.71	16.93	127.19	4.05	8.04	44.4	370.33	8.05	14.7	6.74	24.29	6	35.94	19.39	17.46	9.08	11.86	59.38	1284.42	5.62	32.23	2625.99	2619.69	102.94	103.23
482.736	2214.71	60.96	67.76	54.09	19.41	31.83	4.57	10.85	19.94	217.96	4.11	7.89	16.99	128.37	4.08	8.11	47.28	382.53	8.2	15.05	6.16	23.05	5.93	35.89	18.81	18.04	8.89	11.6	62.12	1312.34	5.72	33.17	2580.25	2573.89	102.62	102.99
483.089	2213.09	59.92	67.76	53.88	20.29	31.47	4.52	10.73	20.72	223.98	4.13	7.93	15.33	130.65	4.05	8.24	50.1	397.93	8.59	15.51	6.38	24.05	5.91	35.73	18.19	16.92	8.77	11.6	66.86	1363.9	5.88	34.05	2591.55	2583.73	102.73	102.76
483.442	2164.77	60.26	67.62	53.92	19.79	31.93	4.5	10.68	20.14	225.04	4.14	7.99	16.93	131.97	4.1	8.29	51.62	411.29	8.78	16.07	5.4	24.71	5.83	35.7	18.87	17.38	8.56	11.36	69.9	1392.52	6.03	35.19	2547.45	2543.29	102.65	102.99
483.794	2183.29	61.4	67.4	53.82	20.13	33.27	4.47	10.68	20.08	233.5	4.21	8.06	18.37	135.39	4.05	8.4	54.88	433.23	9.02	16.52	5.7	24.01	5.68	35.6	18.03	16.42	8.52	11.26	74.74	1461.32	6.2	36.22	2578.07	2571.95	102.59	102.92
484.147	2167.03	59.88	66.8	53.47	20.57	33.13	4.37	10.65	20.86	238.88	4.09	8.05	18.13	137.97	4.07	8.45	58.4	450.91	9.3	17.07	5.84	24.29	5.63	35.48	18.17	16.5	8.28	11.05	79.5	1510.64	6.19	37.12	2562.65	2559.53	102.08	102.4
484.499	2121.65	59.04	66.8	53.49	19.67	32.09	4.48	10.68	21.98	240.06	4.14	8.28	17.95	138.25	4.07	8.6	61.2	464.07	9.59	17.69	6.28	24.95	5.52	35.42	17.93	16.94	8.09	10.99	83.24	1538.98	6.35	38.25	2521.01	2515.29	102.11	102.49
484.852	2116.63	59.36	66.32	53.12	20.05	31.89	4.51	10.63	23	246.48	4.23	8.31	17.93	142.03	4.07	8.6	65.4	483.85	9.88	18.11	5.4	24.69	5.5	35.26	17.97	16.46	7.91	10.9	87.86	1596.18	6.52	39.41	2521.77	2516.43	102.13	102.13
485.204	2072.85	57.86	65.99	53.18	19.67	31.05	4.42	10.53	22.06	248.4	4.27	8.32	18.73	143.37	4.16	8.69	67.12	497.39	10.14	18.71	5.4	24.71	5.35	35.19	17.33	16.68	7.77	10.8	92.32	1628.48	6.7	40.46	2477.25	2476.09	101.74	102.16
485.556	2057.39	58.5	65.87	53.12	19.01	30.83	4.44	10.54	22.78	252.72	4.18	8.4	18.51	144.65	4	8.74	69.98	518.57	10.44	19.41	6.42	23.25	5.3	35.16	16.53	16.9	7.53	10.56	98.98	1679.44	6.8	41.88	2476.93	2468.63	101.82	101.97
485.909	2042.87	56.8	65.73	53.01	20.35	32.57	4.43	10.39	22.52	260.42	4.22	8.65	18.63	148.95	4.2	8.85	74.5	539.39	10.8	20.11	5.94	23.85	5.33	34.95	17.01	16.74	7.44	10.54	105.6	1733.9	6.96	43.04	2460.91	2457.13	101.55	101.83
486.261	2019.99	57.08	65.2	52.72	20.11	30.91	4.48	10.43	23.04	263.08	4.31	8.73	18.79	148.95	4.2	8.96	77.8	561.61	11.28	20.73	5.58	23.55	5.18	34.94	15.95	17.52	7.28	10.42	111.78	1778.14	7.13	44.42	2444.83	2436.35	101.45	101.61
486.613	2008.15	57.28	65.21	52.61	20.03	32.45	4.46	10.39	24.32	268	4.23	8.76	18.97	152.53	4.18	9.2	80.28	582.85	11.64	21.51	5.72	24.27	5.14	34.81	16.99	16.76	7.14	10.29	118.58	1838.66	7.41	45.66	2443.39	2429.23	101.69	102
486.965	1966.83	56.28	64.75	52.37	20.47	31.53	4.36	10.32	23.82	269.62	4.17	8.92	19.39	152.67	4.14	9.18	84.68	599.85	12.01	22.09	4.9	23.91	5.12	34.58	15.43	15.2	6.92	10.18	124.88	1870.26	7.55	47	2401.11	2390.41	101.24	101.5
487.317	1946.59	55.18	64.4	51.98	21.15	31.73	4.44	10.33	23.56	276.62	4.25	9.08	19.69	155.49	4.2	9.44	89.96	623.05	12.45	22.9	5.84	24.17	5.16	34.6	16.81	15.28	6.92	10.09	132.84	1920.6	7.88	48.35	2387.51	2376.95	101.03	101.15
487.669	1942.55	55.12	64.18	52	21.51	32.25	4.41	10.11	24.92	281.38	4.27	9.12	20.29	158.71	4.2	9.42	94.34	647.95	12.88	23.6	5.52	24.35	5	34.5	16.67	16.84	6.74	9.93	142.12	1982.12	7.94	49.93	2382.95	2372.49	101.04	101.33
488.021	1904.33	55.76	64.16	52.06	20.63	33.49	4.41	10.18	25.64	285.22	4.28	9.34	20.19	160.25	4.3	9.57	100.24	667.45	13.44	24.47	7.02	25.11	5.05	34.42	16.15	17.12	6.62	9.85	150.8	2019.8	8.26	51.3	2349.77	2342.97	101.3	101.4
488.373	1878.07	53.94	64.06	51.94	20.39	32.09	4.33	10.06	25.06	286.18	4.31	9.36	20.13	159.95	4.27	9.59	103.68	689.99	13.88	25.43	5.74	23.81	4.96	34.16	14.93	15.7	6.58	9.76	158.46	2062.78	8.54	52.87	2329.71	2315.49	101.04	101.18
488.725	1852.81	53.4	63.49	51.47	19.97	30.77	4.49	10.22	26.26	290.74	4.39	9.53	20.85	163.01	4.3	9.93	109.08	715.87	14.46	26.36	5.54	23.27	4.94	34.12	15.73	16.02	6.48	9.71	169.74	2107.02	8.9	54.37	2301.07	2292.35	100.65	100.95
489.077	1826.77	53.48	63.43	51.46	19.39	31.09	4.37	10.11	26.3	296.7	4.29	9.6	20.57	163.51	4.36	9.89	114.96	740.81	14.94	27.28	5.84	23.55	4.86	33.94	15.07	15.14	6.32	9.54	179.12	2159.64	9.22	55.97	2284.83	2278.45	100.77	100.83
489.429	1796.35	52.04	63.12	51.44	19.29	31.51	4.47	10.07	25.92	296.02	4.35	9.84	20.83	163.95	4.38	10.07	120.4	761.39	15.64	28.15	5.72	24.23	4.87	33.85	14.03	15.18	6.35	9.5	188.2	2196.5	9.51	57.58	2255.11	2248.85	100.66	101.06
489.781	1764.05	52.58	62.72	51.09	19.29	31.67	4.4	9.97	26.76	301.02	4.3	9.78	21.37	166.11	4.3	10.11	126.42	786.55	16.18	29.18	5.9	23.95	4.83	33.6	14.51	15.68	6.13	9.37	200.44	2234.66	9.75	59.01	2224.19	2217.01	100.44	100.7
490.133	1752.05	51.36	62.61	51.02	19.21	30.69	4.42	9.99	26.56	303.84	4.4	9.95	21.69	166.79	4.4	10.23	131.86	817.97	16.85	30.17	5.66	22.67	4.8	33.69	14.97	15.02	6.04	9.32	213.44	2296.5	10.21	60.82	2220.03	2208.51	100.6	100.72
490.485	1712.33	49.46	62.59	50.79	18.81	29.73	4.43	9.97	26.52	304.82	4.49	10.13	21.17	168.03	4.52	10.33	135.78	833.91	17.47	31.26	4.76	23.35	4.8	33.51	14.25	15.14	5.96	9.25	224.38	2316.18	10.53	62.6	2176.35	2164.79	100.44	100.61
490.836	1689.91	49.62	61.91	50.57	20.03	30.11	4.35	9.83	27.64	308.8	4.45	10.2	21.15	169.73	4.44	10.49	141.56	863.59	18.11	32.36	6.6	22.99	4.75	33.35	13.99	14.76	5.86	9.08	238.94	2372.34	10.89	64.24	2159.59	2151.91	100.16	100.48
491.188	1686.39	49.06	61.74	50.3	20.33	30.33	4.25	9.71	28.16	316.08	4.36	10.19	21.41	172.87	4.46	10.41	150.7	902.33	18.92	33.47	5.36	23.07	4.63	33.11	13.59	15.86	5.72	8.89	255.48	2444.54	11.24	65.98	2168.59	2161.15	100.21	100.28
491.54	1639.27	47.18	61.5	50.24	19.13	29.17	4.35	9.76	27.62	314.02	4.41	10.34	21.99	171.25	4.45	10.7	155.72	917.61	19.68	34.61	6.06	22.65	4.59	33.02	14.31	13.92	5.65	8.93	266.26	2452.78	11.72	67.8	2117.33	2108.19	100.06	100.4
491.891	1601.23	47.08	61.34	50.04	18.25	29.31	4.34	9.75	28.04	314.14	4.48	10.51	21.67	170.31	4.5	10.8	161.9	942.63	20.56	35.99	5.72	21.67	4.62	32.98	14.09	14.18	5.66	8.91	282.54	2475.48	12.19	69.75	2076.63	2071.39	100.45	100.58
492.243	1580.51	46.98	61.02	49.73	19.07	28.83	4.42	9.71	27.9	316.26	4.47	10.78	21.57	173.47	4.6	11.04	170.38	972.75	21.37	37.21	4.7	21.69	4.66	32.94	13.83	14.56	5.59	8.86	298.4	2517.66	12.75	71.67	2062.81	2057.11	100.17	100.38
492.594	1542.93	47.5	60.49	49.49	18.87	29.57	4.41	9.68	28.26	315.8	4.52	10.81	22.29	171.23	4.69	11.09	176.16	997.51	22.31	38.41	6.46	21.87	4.61	32.57	12.49	13.68	5.52	8.72	315.24	2538.22	13.36	73.27	2029.05	2019.55	99.67	99.85
492.946	1518.95	46.38	60.36	49.39	18.47	29.09	4.26	9.51	28.94	320.36	4.48	10.86	21.43	173.25	4.55	11.05	184.36	1027.21	23.15	39.7	5.24	21.53	4.52	32.49	12.43	13.84	5.39	8.61	333.28	2584.78	13.84	75.09	2009.41	2001.41	99.8	99.91
493.297	1493.47	46.04	60.11	49.2	17.29	28.21	4.36	9.51	28.28	320.76	4.58	11.13	21.09	173.09	4.69	11.25	191.58	1055.95	24.25	41.24	4.74	21.01	4.56	32.4	12.83	13.46	5.43	8.57	351.62	2614.94	14.43	77.19	1986.05	1980.67	99.81	100.11
493.649	1471.79	44.54	59.68	48.96	17.83	27.51	4.42	9.47	28.62	323.48	4.59	11.18	22.23	174.77	4.74	11.34	201.5	1089.97	25.2	42.49	4.7	20.57	4.55	32.18	12.75	13.7	5.38	8.57	372.86	2654.3	15.11	79.22	1968.23	1964.27	99.93	100.02
494	1438.71	42.92	59.51	48.7	18.61	27.59	4.33	9.34	28.8	324.24	4.54	11.26	21.73	173.21	4.71	11.43	209.16	1112.37	26.34	44.05	4.96	20.19	4.44	32.12	12.61	12.46	5.27	8.35	391.5	2674.1	15.71	80.97	1936.11	1930.05	99.77	100.05
494.351	1403.91	43.22	59.27	48.66	17.45	27.63	4.27	9.4	28.98	323.24	4.51	11.46	22.97	171.49	4.76	11.55	217.5	1134.87	27.32	45.5	5.26	20.63	4.48	31.93	11.57	13.72	5.16	8.36	413.34	2689.46	16.39	82.65	1901.65	1901.05	99.67	99.95
494.703	1388.23	42.24	58.66	48.27	17.03	26.91	4.37	9.35	28.86	325.44	4.62	11.58	22.19	173.55	4.83	11.65	226.42	1173.17	28.5	46.95	4.22	20.95	4.54	31.73	11.49	13.14	5.17	8.33	438.52	2727.52	17.26	84.66	1895.19	1887.31	99.22	99.56
495.054	1363.25	41.94	58.69	48.17	17.53	27.99	4.32	9.23	29.12	327.98	4.59	11.73	23.07	173.33	4.86	11.68	235.18	1208.15	29.99	48.49	4.82	20.57	4.5	31.66	12.01	14	5.13	8.23	464.16	2765.96	17.93	86.73	1879.29	1874.75	99.52	99.79
495.405	1328.43	40.32	58.38	47.79	17.65	28.01	4.37	9.31	30.3	326.2	4.72	11.85	22.63	172.93	4.92	11.84	243.54	1227.39	31.12	50.12	5.52	19.77	4.49	31.41	12.31	14.06	5.1	8.24	486.88	2767.38	18.87	88.68	1842.93	1836.05	99.45	99.49
495.756	1302.95	41	57.96	47.61	16.65	27.77	4.24	9.09	30.04	326.08	4.62	11.93	22.31	173.39	4.89	11.78	254.4	1259.71	32.34	51.6	4.46	21.17	4.36	31.21	11.43	13.04	4.98	8	514.94	2797.32	19.65	90.63	1827.85	1823.19	99.24	99.58
496.107	1278.87	40.74	57.53	47.49	16.69	27.09	4.32	9.01	30.3	328.12	4.62	12.02	23.11	173.11	4.94	11.9	263.94	1292.47	33.71	53.38	4.8	20.39	4.3	31.15	11.41	13.52	4.98	8.03	542.28	2815.58	20.62	92.37	1805.73	1796.73	99.19	99.46
496.458	1246.85	39.06	57.07	47.13	16.17	25.05	4.29	8.93	30.26	324.56	4.58	12.2	22.55	172.49	4.96	12.08	273.62	1313.09	35.18	54.95	5.04	19.45	4.33	30.87	10.77	12.66	4.92	7.92	569.4	2821.3	21.55	94.19	1776.21	1766.71	99.04	99.27
496.809	1223.55	38.78	56.99	46.84	16.09	25.25	4.29	8.88	29.3	325.14	4.79	12.22	22.07	170.79	5.04	12.14	283.42	1343.87	36.72	56.76	4.68	19.81	4.29	30.85	10.61	13.4	4.86	7.91	600.6	2841.08	22.68	96.13	1749.63	1747.05	99.29	99.31
497.16	1199.61	37.88	56.68	46.65	15.59	24.85	4.36	8.94	30.3	327.32	4.79	12.4	21.53	171.17	5	12.31	295.34	1372.23	38.26	58.35	4.06	19.31	4.28	30.63	11.05	12.3	4.9	7.86	630.86	2860.72	23.65	98.06	1736.69	1728.41	99.01	99.2
497.511	1179.73	37.72	56.21	46.45	15.37	25.07	4.27	8.92	30.44	327.12	4.79	12.53	21.65	170.09	5.14	12.31	307.44	1410.57	40.04	60.18	4.64	18.83	4.28	30.59	10.41	12.04	4.87	7.76	667.9	2881.62	25.03	99.95	1720.13	1712.15	99.12	99.15
497.862	1149.55	37.06	55.88	46.25	15.63	26.11	4.27	8.78	30.4	323.1	4.76	12.54	22.05	168.77	5.08	12.39	315.9	1425.19	41.61	61.8	5.34	19.67	4.26	30.3	11.35	11.8	4.77	7.71	695.7	2874.44	26.13	101.61	1689.53	1679.93	99.03	99.07
498.213	1119.33	36.88	55.57	45.85	14.89	25.41	4.22	8.74	29.8	322.1	4.88	12.7	23.15	168.23	5.09	12.45	326.82	1448.81	43.21	63.53	4.9	19.17	4.26	30.04	9.97	12.16	4.82	7.66	730.04	2878.22	27.45	103.34	1662.39	1653.43	98.92	98.99
498.564	1103.31	34.98	55.34	45.57	15.37	25.29	4.29	8.74	30.18	324.08	4.89	12.81	23.53	168.05	5.21	12.52	340.46	1479.63	44.96	65.23	5.22	18.97	4.34	29.93	9.71	11.68	4.77	7.65	773.58	2896.92	28.81	105.13	1647.05	1642.49	98.73	98.98
498.915	1075.27	35.74	55.07	45.4	15.55	23.47	4.26	8.63	30.44	321.04	4.81	12.95	21.63	166.51	5.19	12.46	349.62	1506.31	46.83	66.97	4.6	19.01	4.26	29.82	10.31	11.68	4.69	7.54	800.76	2889.44	30.1	106.76	1619.69	1616.21	98.84	98.89
499.265	1064.45	34.9	54.46	45.18	14.43	24.45	4.3	8.61	30.46	324.92	4.9	12.98	22.91	166.57	5.23	12.61	365.64	1548.21	48.49	68.65	5.3	19.51	4.23	29.7	10.29	12.46	4.68	7.56	852.58	2927.62	31.71	108.49	1616.01	1614.21	98.81	98.93
499.616	1032.61	34.62	54.12	44.76	14.87	23.67	4.24	8.56	29.7	320.3	4.86	13.03	21.63	164.25	5.26	12.64	374.3	1560.99	50.45	70.45	4.96	18.49	4.2	29.4	9.91	11.38	4.69	7.38	887.5	2908.02	33.17	110.03	1586.71	1579.41	98.58	98.59
499.967	1019.27	34.7	53.84	44.55	15.81	24.83	4.19	8.47	31.22	322.36	4.87	13.11	23.65	166.99	5.19	12.54	391.78	1601.83	52.41	72.22	6.58	19.95	4.16	29.28	11.09	14.66	4.63	7.38	939.52	2931.04	34.74	111.62	1582.53	1572.01	98.6	98.7
500.317	989.61	33.32	53.61	44.46	14.27	23.13	4.2	8.48	29.3	317.9	4.98	13.2	20.85	161.15	5.33	12.72	398.88	1607.03	54.44	73.97	4.74	17.85	4.23	29.09	9.21	11.76	4.63	7.34	973.38	2911.68	36.62	113.33	1546.17	1542.57	98.49	98.8
500.668	975.23	33.08	53.22	44.09	14.47	23.01	4.15	8.37	30.14	318.98	4.91	13.26	22.07	162.95	5.37	12.64	416.24	1646.65	56.2	75.41	4.62	18.15	4.14	29.03	9.15	12.02	4.58	7.22	1027.3	2935.64	38.36	114.48	1542.05	1535.63	98.45	98.73
501.018	950.75	33.14	53.08	43.68	13.85	23.69	4.23	8.3	30.9	316.8	4.98	13.3	22.17	161.89	5.41	12.61	427.4	1663.15	58.46	77.42	5.98	19.09	4.13	28.9	10.31	12.2	4.56	7.22	1071.62	2924.66	40.07	116.52	1515.73	1511.89	98.74	98.65
501.369	935.05	31.12	52.43	43.44	14.25	22.59	4.13	8.22	29.8	314.78	4.94	13.36	21.59	160.43	5.41	12.59	442.92	1689.93	60.32	78.83	5.68	18.01	4.15	28.54	9.77	11.48	4.53	7.21	1124.84	2925.7	41.97	117.37	1499.71	1495.13	98.23	98.36
501.719	912.15	30.36	52.26	43.22	13.27	21.13	4.17	8.09	29.7	313.86	4.93	13.47	21.15	158.89	5.42	12.72	456.54	1714.51	62.7	80.6	4.74	16.15	4.12	28.55	9.51	11.62	4.5	7.08	1174.26	2924.82	44.19	118.95	1484.69	1479.05	98.54	98.56
502.07	898.07	30.8	51.73	43.04	13.51	22.55	4.11	8.08	28.64	312	4.87	13.55	21.05	158.41	5.38	12.66	470.84	1740.89	64.62	82.12	4.7	17.43	4.14	28.37	8.63	11.66	4.42	7.13	1233.84	2930.06	46.03	120.09	1470.25	1468.87	98.46	98.62
502.42	876.67	30.7	51.3	42.61	12.63	22.55	4.18	8.06	29.28	312.54	4.99	13.38	21.55	156.99	5.34	12.67	484.72	1758.07	66.93	83.62	5.08	17.79	4.12	28.24	9.15	11.18	4.44	7.02	1286.96	2926.26	48.18	121.24	1453.29	1445.07	98.35	98.22
502.77	854.13	28.94	51.15	42.41	11.99	22.77	4.2	8.01	28.94	309.38	5.03	13.46	20.87	156.55	5.45	12.69	495.06	1766.41	69.07	85.23	5.72	16.19	4.14	28.04	8.49	10.5	4.43	7.03	1332.16	2905.5	50.53	122.69	1428.49	1424.31	98.4	98.36
503.121	841.05	28.88	50.74	42.29	13.35	21.59	4.1	7.85	28.66	308.7	4.99	13.49	21.67	154.83	5.46	12.72	510.76	1796.07	71.39	86.96	4.64	16.61	4.07	27.9	8.29	10.94	4.4	6.91	1396.04	2922.08	52.94	124.01	1419.33	1413.65	98.26	98.52
503.471	823.83	29.22	50.41	41.78	12.95	21.27	4.17	7.84	29.52	306.64	5.04	13.46	21.41	153.15	5.49	12.68	524.22	1812.87	73.36	88.24	4.6	15.69	4.09	27.71	9.05	10.8	4.41	6.85	1454.26	2911.38	55.11	125	1402.27	1397.05	98.17	98.33
503.821	808.49	28.24	50.15	41.6	12.75	21.03	4.15	7.74	29.48	306.2	5.02	13.6	20.47	152.47	5.37	12.65	540.5	1840.91	75.66	89.61	5.08	16.39	4.06	27.58	8.93	11.2	4.32	6.74	1517.48	2915.88	57.54	126.07	1393.29	1388.01	98.15	98.41
504.171	786.15	27.44	49.72	41.28	11.73	20.89	4.1	7.74	29.24	304.04	5.04	13.53	20.75	151.13	5.46	12.73	552.38	1849.45	77.77	91.09	4.98	16.51	4.1	27.47	8.87	11.46	4.4	6.77	1579.02	2900.14	60.12	127.02	1378.69	1372.47	98.25	98.34
504.521	772.17	28.08	49.22	41.09	11.49	21.87	4.08	7.67	28.3	300.8	5.01	13.5	21.03	149.61	5.47	12.66	564.34	1863.35	80.14	92.3	4.9	17.49	4.05	27.34	8.99	10.84	4.35	6.8	1635.46	2893.32	62.54	128.07	1359.89	1355.63	98.16	98.32
504.871	761.29	27.58	48.81	40.84	12.01	20.81	4.13	7.73	27.72	300.9	5.11	13.58	20.53	147.85	5.52	12.66	580.78	1889.57	82.34	93.68	4.9	16.63	4.08	27.17	8.07	12.6	4.37	6.77	1707.48	2903.88	65.22	128.76	1352.81	1349.03	98.27	98.1
505.221	745.85	27.28	48.46	40.33	12.21	20.77	4.07	7.62	28.44	299.38	5.04	13.5	20.41	149.55	5.56	12.49	595.48	1909.07	84.17	94.58	5.02	16.25	4.08	26.86	9.29	11.18	4.36	6.67	1779.18	2900.92	67.91	129.52	1343.57	1336.71	97.98	97.93
505.571	723.05	26.68	48.01	40.07	11.37	20.77	4.04	7.5	28.26	295.4	5.08	13.48	19.87	146.69	5.42	12.47	605.66	1906.85	86.44	96.14	4.94	16.01	4.07	26.83	8.95	11.12	4.36	6.53	1826.94	2871.44	70.68	130.58	1319.29	1312.83	98.07	98.21
505.921	711.53	26.08	47.66	39.89	11.41	19.29	4.06	7.5	28.06	295.04	5.07	13.46	19.63	146.61	5.61	12.39	617.66	1923.71	88.37	97.06	3.88	15.65	4.06	26.7	8.05	10.92	4.27	6.6	1896.16	2870.16	73.26	131.08	1305.89	1302.79	97.92	97.93
506.271	696.97	26.2	47.16	39.51	10.93	21.45	3.99	7.35	28.88	290.22	4.94	13.35	20.07	145.11	5.44	12.31	630.62	1924.05	90.51	98	4.72	15.87	3.98	26.56	8.97	11.5	4.28	6.48	1953.7	2851.5	75.98	131.71	1289.51	1283.07	97.77	97.92
506.621	689.57	25.6	46.96	39.21	11.15	20.01	4	7.34	27.08	292.38	5.03	13.31	18.91	144.99	5.47	12.29	650.88	1959.71	92.61	98.96	4.28	15.89	4.01	26.39	8.11	10.2	4.28	6.46	2042.6	2874.76	78.75	132.08	1292.75	1288.45	97.71	97.51
506.971	667.37	25.04	46.35	38.75	11.61	20.25	4	7.24	28.08	288.24	4.92	13.27	18.67	141.45	5.37	12.22	656.52	1952.21	94.53	99.86	4.8	15.21	4	26.16	8.15	10.64	4.11	6.37	2092.68	2840.76	81.64	132.83	1265.29	1264.43	97.85	97.56
507.321	656.31	25.74	46.07	38.47	10.75	20.73	3.95	7.26	26.78	287.02	4.94	13.22	18.63	142.05	5.35	12.22	669.42	1963.71	96.35	100.74	5.42	16.39	4	26.06	8.43	11.16	4.15	6.35	2161.58	2843.16	84.58	133.28	1258.19	1254.87	97.63	97.66
507.67	640.77	25.28	45.72	38.33	11.11	19.53	3.99	7.17	27.98	281.98	4.98	13.16	18.99	140.03	5.36	12.04	681.06	1967.81	98.21	101.61	5.24	15.11	3.95	25.92	8.65	11.34	4.15	6.28	2229.6	2826.14	87.61	134.21	1243.07	1240.25	97.97	97.74
508.02	633.31	24.1	45.38	37.98	10.23	20.19	3.9	7.05	27.3	284.38	4.96	13.12	18.71	138.31	5.36	11.98	697.8	1984.77	99.71	102.51	4.7	15.35	3.96	25.82	7.33	10.1	4.08	6.22	2308.3	2832.52	90.27	134.48	1239.91	1234.09	97.56	97.64
508.37	622.49	24.54	44.88	37.56	11.69	21.03	3.95	7.02	28.1	283.84	4.97	13.03	19.55	138.49	5.32	11.9	709.06	2003.43	101.4	102.74	4.56	16.05	3.95	25.66	7.69	11.46	4.06	6.19	2387.18	2834.14	93.19	134.89	1234.23	1229.69	97.7	97.38
508.719	596.95	23.32	44.54	37.44	10.07	19.45	3.98	7.03	26.26	276.32	4.94	13.03	18.09	135.25	5.32	11.91	704.38	1963.83	103.29	103.42	3.92	15.27	4.04	25.5	6.87	10.46	4.14	6.24	2403.22	2770.4	96.15	135.67	1196.09	1190.55	97.48	97.57
509.069	591.77	23.1	44.03	36.97	9.35	19.37	3.99	6.94	26.78	277.46	5.02	12.92	18.25	135.43	5.26	11.73	722.06	1986.51	104.87	104.16	5.22	14.91	3.98	25.5	7.69	11.06	4.08	6.12	2491.82	2781.58	99.03	135.72	1195.31	1192.05	97.71	97.68
509.418	579.29	22.4	43.76	36.73	10.59	19.79	3.93	6.9	26.1	274.9	4.87	12.85	18.85	135.23	5.27	11.77	732.02	1989.39	106.46	104.67	4.42	15.65	4	25.29	7.99	11.04	4.06	6.09	2559.12	2771.74	101.97	136.08	1183.37	1183.25	97.62	97.58
509.768	569.19	23.04	43.14	36.27	10.75	20.01	3.94	6.79	26.82	274.1	4.89	12.76	18.05	133.69	5.23	11.52	741.54	1995.41	107.48	105.14	5	15.65	3.94	25.12	8.35	11.36	4.05	6.07	2629.44	2768.9	104.49	136.02	1176.49	1172.05	97.38	97.05
510.117	555.11	22.26	42.76	36.03	10.57	19.75	3.95	6.77	26.12	272.4	4.94	12.65	16.81	133.05	5.23	11.5	747.88	1994.11	108.82	105.35	3.7	15.77	3.96	24.98	7.43	10	4.04	5.96	2680.18	2751.52	107.26	136.17	1157.45	1154.77	97.29	97.29
510.467	538.75	22.84	42.32	35.82	10.31	18.67	3.95	6.77	26.08	269.26	4.92	12.59	17.59	132.15	5.22	11.43	754.08	1986.79	110.44	105.91	4.82	16.23	4.02	25.07	8.55	11.44	4.1	6.01	2733.2	2728.26	110.18	136.76	1143.13	1141.81	97.57	97.38
510.816	533.43	22.4	42.11	35.35	9.41	19.27	3.96	6.71	25.96	267.88	4.89	12.59	16.55	131.41	5.22	11.38	760.88	1992.41	111.45	106.01	4.1	15.33	4	24.92	7.71	10.9	4.09	5.98	2805.22	2728	112.63	136.37	1136.29	1134.69	97.32	97.53
511.165	514.39	21.3	41.61	35.2	9.51	19.03	3.96	6.65	24.92	262.5	4.93	12.48	17.17	128.89	5.19	11.29	761	1968.53	112.65	106.39	4.4	14.81	3.96	24.78	6.91	10.8	4.07	5.97	2832.28	2694.3	115.4	136.83	1114.91	1111.57	97.26	97.37
511.515	513.99	20.26	41.12	34.76	8.87	19.23	3.9	6.56	25.42	265.72	4.89	12.36	16.95	130.99	5.11	11.23	779.7	2003.47	113.59	106.66	4.82	14.51	3.95	24.6	7.53	11	3.98	5.84	2938.8	2726.6	118.08	136.87	1122.63	1121.37	97.47	97.55
511.864	503.05	21.72	40.76	34.45	9.81	19.43	3.96	6.52	25.22	264.88	4.81	12.29	16.55	129.19	5.08	11.1	783.8	1995.41	114.47	106.78	4.84	15.17	4.02	24.55	6.33	10.32	4.06	5.86	2988.18	2708.44	120.28	136.85	1110.43	1109.45	97.25	97.34
512.213	493.59	20.24	40.42	34.11	9.81	19.35	3.89	6.46	24.34	263.18	4.84	12.15	16.21	128.93	5.03	11.04	790.88	2000.77	115.42	106.92	4.44	15.27	3.91	24.44	6.71	10.96	3.92	5.78	3051.12	2706.46	122.68	137.01	1102.17	1102.03	97.14	97.36
512.562	477.41	20.9	40.07	33.67	9.31	18.33	3.89	6.38	24.56	259.42	4.72	12.07	15.57	126.35	5.04	10.92	786.76	1974.93	115.84	106.66	4.76	14.63	3.97	24.38	7.63	9.62	4.03	5.74	3064.7	2663.66	125.13	136.89	1079.71	1078.11	97.07	97.13
512.911	469.09	19.5	39.41	33.35	8.57	18.69	3.77	6.32	23.56	258.66	4.69	11.93	15.13	125.45	4.8	10.88	795.68	1979.59	116.72	107.05	4.5	15.05	3.91	24.12	7.29	10.16	3.87	5.6	3133.28	2668.54	127.81	137.03	1073.83	1072.57	97.18	97.16
513.26	462.87	20.88	39.14	32.98	9.93	19.97	3.9	6.24	24.36	259.34	4.74	11.82	17.03	126.89	4.87	10.65	803.82	1981.87	117.3	106.61	5.54	15.77	3.92	23.97	7.61	10.9	3.94	5.66	3192.36	2667.56	129.77	136.9	1069.65	1068.33	97.12	97
513.609	446.93	19.22	38.63	32.64	8.45	18.83	3.79	6.22	23.86	254.9	4.65	11.7	15.63	122.81	4.8	10.55	790.94	1943.17	118.21	106.98	4.62	14.91	3.93	23.96	7.33	10.86	3.94	5.61	3183.6	2611.7	132.13	137.01	1038.77	1034.87	97.03	97.13
513.958	438.29	19.78	38.19	32.35	9.91	19.13	3.84	6.15	24.88	254.12	4.67	11.67	15.81	122.31	4.77	10.52	801.62	1951.67	118.46	106.86	4.88	15.77	3.91	23.94	7.21	12.22	3.92	5.55	3244.12	2616.56	134.07	136.68	1034.39	1036.03	96.85	96.92
514.307	427.23	17.72	37.79	31.94	9.63	18.95	3.81	6.13	23.02	252.44	4.68	11.48	15.19	121.57	4.7	10.35	793.64	1934.35	119.01	106.73	4.6	14.69	3.94	23.82	6.31	11.04	3.86	5.5	3263.48	2592.02	135.84	136.66	1017.83	1015.13	96.83	96.87
514.656	422.69	17.98	37.51	31.74	8.59	18.01	3.78	6.08	23.5	253.04	4.64	11.48	15.07	123.27	4.66	10.32	807.34	1951.33	119.51	106.61	4.66	14.51	3.91	23.72	7.41	11.04	3.87	5.57	3339.8	2608.54	138.18	136.55	1019.55	1020.29	97.03	96.93
515.005	410.75	18.44	36.93	31.25	8.37	18.73	3.72	6.08	24.38	249.82	4.64	11.33	14.33	122.11	4.62	10.23	800.76	1927.99	119.52	106.19	5.44	14.67	3.83	23.62	7.01	11.22	3.84	5.42	3349.52	2577.46	139.78	136.3	1001.85	1000.97	96.76	96.77
515.354	403.13	18.4	36.66	31.05	8.19	18.31	3.79	6.08	22.38	250.08	4.64	11.31	14.57	121.47	4.61	10.15	805.38	1927.25	120.17	106.58	5.04	14.55	3.9	23.63	6.85	11.42	3.9	5.44	3385.44	2569.74	141.76	136.65	995.83	993.97	96.79	97.16
515.703	395.33	17.76	36.12	30.7	8.59	18.87	3.79	5.97	22.44	249.9	4.59	11.17	14.77	121.71	4.59	10.08	804.54	1914.05	120.47	106.23	3.98	15.19	3.86	23.43	6.01	11.7	3.91	5.45	3413.46	2554.96	143.24	136.35	984.51	981.75	96.82	97.1
516.051	387.99	17.9	35.78	30.3	8.19	19.35	3.76	5.92	23.02	249.18	4.51	11.07	13.65	119.91	4.57	9.87	805.12	1917.95	120.57	105.91	3.94	14.85	3.91	23.38	6.39	10.9	3.82	5.4	3450.18	2551.2	144.81	136.16	974.49	974.97	96.87	96.93
516.4	377.77	18.34	35.38	30.11	8.83	19.61	3.82	5.96	22.68	249.42	4.52	11.03	14.05	120.83	4.54	9.85	804.44	1903.99	120.93	105.87	4.62	14.75	3.96	23.32	6.73	10.9	3.84	5.43	3475.46	2532.84	146.41	136.25	963.15	963.17	96.95	97.06
516.749	368.81	18.08	34.93	29.82	8.65	19.35	3.79	5.89	22.34	249	4.53	10.95	14.15	119.99	4.6	9.66	803.84	1891.87	120.65	105.58	4.66	15.71	3.92	23.37	6.93	9.98	3.86	5.36	3499.24	2517.7	147.44	136.06	953.19	952.19	96.64	96.81
517.097	366.21	19.16	34.66	29.27	11.91	21.23	3.74	5.8	26.1	251.62	4.44	10.83	16.89	124.17	4.45	9.72	805.82	1887.89	120.96	105.31	7.4	17.97	3.93	23.19	10.03	15.2	3.8	5.22	3520.74	2511.34	148.99	135.85	945.75	947.77	96.73	96.88
517.446	353.67	18.96	34.14	29.06	9.29	19.67	3.78	5.72	23.56	248.62	4.52	10.77	14.51	120.57	4.43	9.53	798.14	1874.23	121	105.03	5.9	16.05	3.87	23.05	8.13	12.66	3.78	5.25	3534.12	2495.3	149.92	135.54	935.91	932.55	96.85	96.73
517.794	346.03	16.08	33.78	28.72	7.67	18.59	3.82	5.72	23.14	248.42	4.49	10.73	13.73	119.59	4.36	9.46	800.8	1865.69	120.79	104.61	4.16	14.59	3.9	23.04	6.33	11.34	3.75	5.22	3553.6	2489.84	151.22	135.48	923.55	924.61	96.73	96.68
518.143	340.81	17.58	33.35	28.36	8.57	18.71	3.76	5.7	22.76	249.8	4.47	10.56	13.49	120.57	4.34	9.46	801.7	1867.77	120.64	104.39	4.18	15.89	3.89	22.96	7.55	12.1	3.8	5.2	3586.12	2489.6	151.83	135.29	920.93	919.69	96.6	96.62
518.491	332.19	16.68	32.96	28.04	8.47	18.21	3.7	5.65	21.76	248.98	4.4	10.53	13.65	119.67	4.3	9.29	794.64	1849.37	120.61	104.03	3.78	15.03	3.87	22.78	6.31	11.56	3.76	5.11	3579.24	2463.16	153.24	135.09	903.31	904.05	96.63	96.69
518.84	324.07	15.22	32.68	27.85	8.31	18.35	3.71	5.59	21.82	247.94	4.4	10.61	13.13	120.35	4.33	9.28	789.8	1832.73	120.35	103.84	4.98	15.65	3.86	22.84	6.43	11.94	3.8	5.14	3587.98	2445.42	153.98	135.1	892.25	892.53	96.82	96.66
519.188	318.51	16.76	32.02	27.35	8.63	19.97	3.76	5.54	22.74	249.82	4.42	10.42	13.51	121.01	4.28	9.15	787.92	1827.35	119.89	103.17	5.44	15.69	3.89	22.72	7.61	12.26	3.75	5.09	3603.74	2437.58	154.49	134.26	887.57	884.35	96.54	96.47
519.536	311.61	16.26	31.8	27.07	8.49	19.75	3.76	5.54	22.34	250.56	4.4	10.38	13.93	119.67	4.23	9.15	784.22	1810.89	119.96	103.16	4.36	16.47	3.89	22.77	8.09	11.94	3.81	5.11	3609.28	2424.5	155.32	134.42	875.91	874.11	96.75	96.55
519.885	303.51	15.24	31.35	26.62	7.73	18.17	3.68	5.54	22.38	249.76	4.38	10.22	12.61	120.27	4.22	9.08	777.58	1800.17	119.47	102.4	4.48	14.79	3.83	22.51	6.75	11.8	3.7	5.08	3599.62	2402.96	155.77	134.08	860.61	859.65	96.45	96.47
520.233	298.49	15.46	30.91	26.37	9.39	19.77	3.77	5.54	22.44	251.48	4.4	10.31	13.15	121.77	4.23	9.07	778.06	1795.47	119.49	102.4	5.84	15.41	3.88	22.63	7.27	13.26	3.79	5.12	3620.16	2400.9	156.7	134.22	858.27	857.39	96.65	96.81
520.581	288.89	15.5	30.55	25.92	6.91	19.89	3.7	5.46	22.1	250.34	4.31	10.29	12.37	121.25	4.18	8.92	767.28	1768.39	118.93	101.73	4.56	15.43	3.8	22.49	5.99	12.62	3.75	5.05	3593.64	2362.74	156.76	133.57	840.25	839.25	96.26	96.45
520.929	283.67	15.66	30.1	25.79	6.75	19.15	3.77	5.45	21.68	252.16	4.35	10.27	11.79	120.39	4.19	8.79	764.58	1760.47	118.65	101.45	3.82	15.63	3.89	22.43	6.85	11.56	3.77	5.09	3605.84	2356.12	157.51	133.47	831.77	831.83	96.65	96.41
521.277	276.21	16.42	29.8	25.34	7.83	19.29	3.69	5.4	23.36	253.86	4.34	10.18	12.69	121.75	4.12	8.84	756.48	1735.23	118.29	101.09	4.32	15.57	3.87	22.36	7.07	12.74	3.72	5.06	3580.46	2326.98	157.65	133.33	816.63	815.21	96.39	96.51
521.625	270.01	14.82	29.39	25.05	7.91	19.33	3.7	5.4	23.08	256.44	4.37	10.13	12.75	122.55	4.14	8.71	756.96	1729.63	117.84	100.42	3.98	15.57	3.87	22.37	6.61	13	3.76	5.04	3593.6	2330.9	157.82	132.86	811.07	813.01	96.21	96.3
521.973	267.19	17.04	29.06	24.77	11.31	23.51	3.75	5.38	25.6	261.5	4.35	10.15	16.21	126.57	4.11	8.74	753.02	1725.11	117.6	100.41	6.64	18.25	3.92	22.38	9.55	16.66	3.77	5.05	3594.1	2317.78	158.28	132.93	807.53	805.97	96.5	96.42
522.321	259.01	14.9	28.62	24.44	8.25	20.75	3.74	5.37	23.8	261.14	4.36	10.13	12.53	124.37	4.1	8.65	746.54	1709.85	116.78	99.72	4.38	15.59	3.81	22.28	7.47	13.44	3.74	5.01	3594	2299.36	158.46	132.68	791.49	793.93	96.26	96.22
522.669	251.59	13.6	28.3	24.07	7.67	20.57	3.67	5.29	24.6	260.58	4.36	10.08	12.83	124.91	4.1	8.58	740.42	1689.05	116.22	99.02	4.9	15.61	3.84	22.16	6.39	14.58	3.72	4.96	3570.44	2280.28	158.43	132.11	782.67	780.61	96.13	96.12
523.017	245.21	13.8	27.88	23.89	7.81	20.35	3.71	5.34	23.82	262.46	4.37	10.15	12.51	124.27	4.05	8.59	731.32	1666.93	116.19	98.82	3.6	16.39	3.87	22.2	6.51	13.7	3.79	5.01	3550.94	2256.96	158.91	132.39	766.09	768.77	96.25	96.31
523.365	240.47	14	27.52	23.47	7.73	20.47	3.7	5.25	23.88	263.52	4.32	10.09	12.07	124.57	4.01	8.58	727.16	1655.89	115.7	98.38	4.66	15.63	3.91	22.14	6.73	13.86	3.71	4.99	3545.1	2245.76	158.89	131.93	763.29	757.87	96.31	96.34
523.713	233.15	13.98	27	23.08	8.23	20.65	3.63	5.19	25.12	265.92	4.34	10.05	12.39	125.81	3.99	8.48	719.2	1635.45	115.04	97.83	4.62	15.81	3.81	21.91	6.21	13.04	3.74	4.93	3519	2217.16	158.91	131.58	746.73	746.21	96.16	96.39
524.061	228.47	14.34	26.74	22.8	8.27	21.33	3.75	5.28	26.44	266.08	4.33	10.02	12.87	126.15	4	8.43	706.14	1612.91	114.45	97.5	5.16	16.57	3.87	21.95	6.97	14.82	3.66	4.95	3486.1	2187.76	158.86	131.35	732.51	731.17	96.31	96.16
524.408	222.27	12.7	26.44	22.59	8.15	19.89	3.68	5.18	26.16	272.36	4.41	10.12	11.31	129.05	4.02	8.48	708.06	1611.09	114.35	97.05	4.04	15.43	3.89	21.95	7.11	14.18	3.7	4.94	3507.88	2190.56	159.22	131.47	729.07	729.45	96.18	96.42
524.756	217.15	12.94	26.06	22.2	6.67	20.67	3.68	5.2	25.4	272.82	4.36	10.08	11.75	128.79	3.99	8.44	699.38	1591.77	113.45	96.41	3.94	15.29	3.83	21.8	6.57	14.32	3.7	4.91	3476.34	2164.22	158.87	130.85	716.43	715.23	95.97	96.08
525.104	211.79	13.46	25.72	22.06	7.81	20.89	3.74	5.2	26.3	276.24	4.34	10.17	12.13	129.55	3.95	8.45	692.76	1572.27	113.15	95.94	4.32	15.95	3.85	21.89	6.49	14.7	3.7	4.94	3459.58	2139.04	158.82	130.63	709.57	706.15	96.11	95.95
525.451	206.93	13.14	25.36	21.71	8.33	21.29	3.7	5.21	26.8	277.72	4.37	10.24	11.41	132.31	4.03	8.45	685.18	1556.53	112.68	95.67	4.56	15.65	3.85	21.82	6.93	15.12	3.74	4.95	3437.44	2123.98	158.79	130.58	698.17	695.65	96.23	96.05
525.799	201.67	12.3	24.95	21.31	7.35	20.31	3.72	5.17	26.54	282	4.4	10.26	11.81	133.11	3.96	8.47	676.94	1539.63	112.05	95.01	3.52	14.15	3.86	21.8	6.07	14.18	3.76	4.97	3414.54	2099.42	158.67	130.29	684.41	686.99	96.2	96.06
526.146	195.39	12.1	24.56	20.97	7.55	21.45	3.68	5.14	27.56	282.64	4.36	10.27	11.81	133.33	3.91	8.31	667.66	1514.91	111.59	94.58	4.1	15.87	3.83	21.69	6.41	13.8	3.65	4.9	3384.42	2074.22	158.76	130.09	671.81	672.85	96.15	96.13
526.494	190.97	13.74	24.33	20.83	9.53	22.63	3.76	5.2	29.64	288.24	4.45	10.41	13.85	136.17	3.95	8.42	660.56	1496.89	110.93	94.24	6.2	17.45	3.89	21.67	8.25	17.04	3.74	5	3361.72	2055.18	158.78	129.74	664.65	666.43	96.24	96.03
526.841	184.53	12.16	23.88	20.39	7.05	21.65	3.63	5.16	28.28	290.2	4.4	10.37	11.85	134.75	3.93	8.39	647.5	1468.19	110.41	93.71	4.2	14.25	3.82	21.59	6.59	15.28	3.72	4.94	3321.3	2024.06	158.22	129.63	648.17	649.93	96.01	95.81
527.189	180.85	12.32	23.56	20.19	6.67	22.15	3.72	5.24	28.98	295.78	4.5	10.47	12.15	138.31	4.01	8.34	647.08	1465.15	109.77	93.12	4.04	16.05	3.89	21.59	6.79	16	3.72	4.94	3322.02	2017	157.63	129.09	644.69	645.33	96.08	95.76
527.536	177.47	11.5	23.21	19.96	7.35	22.75	3.73	5.14	29.6	298.38	4.45	10.46	12.21	139.83	3.96	8.45	638.08	1443.05	109.28	92.59	4.64	14.69	3.85	21.53	6.49	15.9	3.69	4.94	3293.24	1996.62	157.9	129	633.41	631.75	95.94	95.9
527.883	171.43	10.62	23.06	19.67	7.15	22.61	3.81	5.15	29.62	301.88	4.55	10.64	10.83	139.43	4	8.49	627.84	1421.63	109.07	92.3	4.76	15.05	3.89	21.53	7.07	16.38	3.77	4.99	3263.78	1966.74	158.09	129.04	622.19	623.31	96.19	96.25
528.23	167.17	11.3	22.54	19.27	7.43	23.41	3.67	5.18	31.52	309.42	4.48	10.66	13.39	142.71	3.98	8.45	624.4	1410.61	108.11	91.54	5.06	16.23	3.8	21.38	6.37	17.84	3.76	5	3255.44	1956.36	157.35	128.58	617.79	615.91	95.98	95.85
528.578	162.77	10.28	22.26	19.14	6.97	23.25	3.66	5.12	30.96	312.58	4.54	10.83	12.33	143.53	3.95	8.5	615.44	1387.27	107.75	91.29	4.34	15.35	3.86	21.42	6.49	16.32	3.73	5.01	3226.66	1932.44	157.41	128.78	605.63	606.15	95.93	96.09
528.925	158.17	10.86	21.93	18.75	7.23	21.99	3.73	5.13	33.48	314.98	4.51	10.83	11.57	144.67	3.95	8.52	605.34	1361.85	107.05	90.69	4.08	15.43	3.86	21.34	6.73	17.1	3.69	4.96	3187.46	1903.18	156.88	127.98	594.29	592.25	95.89	95.96
529.272	154.39	11.54	21.63	18.56	7.85	22.89	3.59	5.06	34.92	320.22	4.59	10.82	12.71	149.61	3.89	8.5	601.42	1350.99	106.4	90.03	4	16.05	3.82	21.24	7.29	18.72	3.65	4.9	3178.28	1890.64	156.6	127.83	589.01	587.83	96.05	95.87
529.619	150.17	10.72	21.3	18.27	6.65	23.57	3.72	5.11	34.78	321.58	4.6	10.99	11.83	149.41	3.91	8.5	587.18	1323.01	105.75	89.76	3.9	15.45	3.84	21.19	6.73	17.54	3.66	4.97	3124.22	1856.16	156.28	127.66	574.77	574.67	95.99	95.82
529.966	148.21	10.8	20.97	17.97	7.99	24.25	3.7	5.09	35.34	330.02	4.62	11.13	12.81	152.37	3.85	8.59	585.6	1309.87	104.91	88.77	5.28	15.99	3.81	21.09	7.23	18.04	3.69	4.92	3109.7	1841.9	155.56	127.18	568.81	567.45	95.61	95.67
530.313	141.75	10.64	20.66	17.71	7.53	24.01	3.68	5.12	36.64	333.3	4.7	11.32	12.67	154.65	3.92	8.65	576.02	1287.69	104.57	88.43	3.68	15.59	3.83	21.12	7.35	18.42	3.65	4.99	3080.92	1815.94	155.55	127.07	558.31	557.59	95.76	95.64
530.66	137.05	10.62	20.38	17.52	7.19	23.41	3.72	5.15	37.56	336.26	4.69	11.45	12.01	155.19	3.99	8.77	564.44	1257.67	103.68	87.73	3.44	15.03	3.87	21.12	6.43	18.92	3.73	5.01	3032.32	1781.92	155.2	126.59	545.67	542.53	95.67	95.78
531.007	134.67	9.82	20.04	17.24	6.47	23.91	3.66	5.12	39.4	343.78	4.74	11.53	11.85	158.03	4.01	8.8	556.86	1242.09	103.46	87.5	4.84	14.87	3.88	21.09	6.75	18.76	3.71	5.04	3005.42	1763.46	155.14	126.68	538.31	536.09	95.9	95.96
531.354	130.15	9.36	19.75	16.95	7.81	24.61	3.66	5.14	40.3	348.96	4.75	11.69	12.51	159.57	3.89	8.69	550.1	1225.81	102.43	86.74	4.56	15.23	3.84	20.94	7.19	20	3.69	5.04	2987.82	1744.58	154.37	125.99	530.51	529.71	95.6	95.42
531.701	126.91	9.48	19.35	16.69	6.93	24.87	3.67	5.13	41.88	354.44	4.81	11.76	11.97	162.81	4	8.79	540.38	1200.63	102.13	86.19	3.82	14.83	3.78	20.94	6.45	18.76	3.74	5.11	2950.14	1713.94	154.47	126.29	519.81	519.69	95.8	95.83
532.047	123.19	9.54	19.2	16.54	7.91	25.01	3.71	5.21	42.54	362.02	4.88	11.96	13.29	163.61	3.97	8.81	533.44	1184.09	101.32	85.81	4.8	15.91	3.81	20.98	7.31	20.28	3.72	5.12	2922.06	1693.18	154.15	125.99	508.99	509.65	95.82	95.78
532.394	120.11	8.96	18.92	16.3	7.53	25.93	3.69	5.17	44.86	367.9	4.86	12.13	13.27	167.15	3.99	8.98	523.76	1163.41	100.68	85.1	5.08	16.03	3.84	20.94	7.29	20.58	3.73	5.13	2892.56	1669.92	153.75	125.69	499.75	502.03	95.92	95.8
532.741	117.11	8.68	18.65	15.99	7.65	26.17	3.79	5.2	45.86	373.34	4.95	12.31	13.17	169.79	4	9.07	513.88	1145.11	99.87	84.66	4.84	16.05	3.85	20.88	7.27	20.72	3.7	5.18	2866.06	1649.66	153.21	125.19	494.65	494.63	95.75	95.77
533.088	113.05	8.86	18.32	15.78	7.05	25.01	3.71	5.24	46.66	381.3	5.03	12.5	13.85	172.93	4.06	9.1	506.52	1123.87	99.29	84.12	4.42	14.47	3.84	20.71	6.99	21.38	3.74	5.27	2839.5	1625.84	152.9	124.99	484.15	485.79	95.68	95.73
533.434	110.27	9.2	18.14	15.68	7.51	25.97	3.72	5.23	49.24	388.94	5.04	12.83	12.95	175.65	4.02	9.22	499	1106.31	98.83	83.72	4.7	15.63	3.87	20.79	7.03	21.42	3.75	5.27	2816.78	1609.52	152.61	124.81	479.99	480.33	95.78	95.7
533.781	107.83	9.44	17.77	15.36	7.59	26.11	3.69	5.15	50.76	398	5.14	12.86	13.77	178.93	4.01	9.3	497.74	1095.09	98.18	82.91	4.3	15.43	3.81	20.63	7.27	22.56	3.71	5.2	2801.8	1595.3	152.23	124.41	472.49	473.65	95.53	95.53
534.127	104.59	8.04	17.48	14.99	6.67	26.29	3.69	5.2	51.7	401.96	5.16	13.09	13.17	180.25	4.04	9.32	483.62	1067.35	97.48	82.41	4.12	15.89	3.8	20.6	7.71	20.14	3.72	5.24	2744.54	1557.64	152.04	124.18	461.07	460.83	95.59	95.61
534.474	103.97	11.32	17.26	14.91	8.87	28.63	3.71	5.27	56.44	411.72	5.18	13.33	15.85	187.37	4.04	9.45	479.72	1053.23	96.8	81.84	5.46	17.91	3.8	20.56	8.37	24.1	3.74	5.23	2728.6	1546.72	151.5	124.02	457.87	457.53	95.45	95.51
534.82	99.93	9.56	17	14.61	7.73	28.57	3.64	5.19	56.94	418.22	5.26	13.53	15.09	187.67	3.99	9.58	468.54	1028.63	96.08	81.22	5.06	15.77	3.79	20.63	7.05	23.72	3.69	5.23	2692.92	1512.38	151.04	123.73	448.17	449.53	95.47	95.44
535.167	96.63	8	16.72	14.52	7.81	27.41	3.69	5.28	57.18	425.16	5.38	13.87	14.03	192.49	4.06	9.7	461.62	1014.33	95.74	80.7	3.88	16.05	3.81	20.6	6.51	23.52	3.69	5.27	2668.14	1498.66	151.19	123.69	439.09	438.31	95.55	95.81
535.513	93.75	8.5	16.45	14.17	6.71	27.45	3.65	5.33	60.44	434.16	5.39	14.1	14.11	194.81	4.05	9.8	452.6	995.29	94.88	80.16	4.7	15.25	3.8	20.41	6.49	24.42	3.69	5.35	2633.18	1468.64	150.33	123.24	431.27	431.21	95.43	95.42
535.859	91.67	8.7	16.26	14.01	7.97	28.33	3.68	5.35	61.8	441.18	5.55	14.37	14.59	197.67	4.08	9.89	443.8	974.29	94.35	79.79	4.06	16.15	3.85	20.5	7.81	23.76	3.71	5.42	2602.88	1449.9	150.2	123.32	423.39	423.93	95.62	95.65
536.206	88.65	9.04	15.95	13.85	7.23	28.03	3.75	5.31	63.54	450.74	5.6	14.58	14.69	201.59	4.1	9.95	438.56	956.41	93.53	78.94	3.46	14.87	3.79	20.33	7.17	25.1	3.77	5.45	2574.18	1429.22	149.55	122.72	415.89	416.37	95.67	95.47
536.552	86.19	8.38	15.73	13.6	7.85	29.99	3.69	5.33	67.68	461.66	5.7	14.93	15.27	204.25	4.07	10.12	431.06	941.05	92.96	78.35	3.92	16.05	3.81	20.35	7.99	26.14	3.79	5.44	2555.34	1413.24	149.37	122.44	410.73	412.05	95.54	95.45
536.898	84.53	8.42	15.44	13.46	8.27	30.31	3.71	5.37	70.48	472.02	5.78	15.2	16.01	208.79	4.08	10.22	424.96	924.25	92.13	77.6	5.52	15.83	3.79	20.27	8.03	27.18	3.75	5.54	2531.94	1393.56	149.06	121.97	405.13	405.51	95.24	95.55
537.244	82.45	7.04	15.25	13.18	7.31	29.87	3.75	5.48	72.9	481.14	5.87	15.5	15.47	212.83	4.17	10.38	416.6	904.45	91.28	77.07	5.22	15.71	3.8	20.33	7.39	26.58	3.77	5.56	2498.68	1368.68	148.4	121.89	398.55	396.73	95.36	95.43
537.59	79.41	7	15	12.98	7.09	29.93	3.74	5.47	74.48	491.66	5.96	15.9	15.67	216.81	4.19	10.57	410.64	887.31	90.96	76.78	4.06	15.79	3.81	20.22	7.75	26.68	3.78	5.55	2476.5	1350.42	148.41	121.77	391.95	392.49	95.45	95.49
537.936	77.97	8.02	14.79	12.87	7.87	30.25	3.77	5.49	78.2	505.98	6.07	16.21	17.07	222.11	4.2	10.77	406.38	879.45	90.11	75.89	3.78	15.51	3.86	20.27	8.05	28.08	3.79	5.66	2465.72	1342.38	147.7	121.33	388.65	388.83	95.24	95.34
538.282	76.01	7.76	14.59	12.73	7.75	31.21	3.76	5.54	81.08	515.84	6.19	16.58	16.95	226.65	4.19	10.92	397.56	859.39	89.58	75.38	3.9	15.87	3.87	20.19	8.61	28.84	3.86	5.76	2433.28	1317	147.67	121.28	382.07	383.15	95.38	95.43
538.628	74.65	8.68	14.33	12.48	8.85	32.11	3.86	5.62	84.04	524.32	6.33	16.96	17.39	231.31	4.24	11.13	390.06	841.53	88.73	74.72	5.5	16.87	3.86	20.1	9.23	29.42	3.85	5.8	2397.24	1291.78	147.15	120.99	374.99	373.75	95.35	95.42
538.974	72.95	6.98	14.11	12.22	8.23	31.89	3.71	5.51	87.18	535.56	6.33	17.28	16.85	235.55	4.19	11.23	382.72	826.97	88.25	74.43	3.64	15.41	3.79	20.1	7.73	29.32	3.82	5.76	2377.06	1273.88	147.14	120.8	368.85	369.31	95.44	95.47
539.32	69.11	8.08	13.85	12.06	7.89	32.11	3.74	5.56	89.76	545.92	6.51	17.64	17.31	238.29	4.23	11.41	375.24	807.99	87.37	73.66	3.8	14.91	3.78	20.12	8.21	30.24	3.84	5.79	2345.08	1250.16	146.01	120.56	360.79	361.67	95.28	95.15
539.666	68.63	7.18	13.7	11.85	8.67	33.49	3.74	5.65	93.92	558.02	6.57	18.09	18.21	244.01	4.25	11.49	370.08	793.09	86.91	73.05	4.1	15.85	3.79	20.11	8.13	30.22	3.78	5.88	2320.5	1237.1	146.11	120.44	356.29	357.29	95.52	95.36
540.012	68.31	7.88	13.4	11.63	8.85	34.77	3.72	5.6	97.22	571.44	6.69	18.41	18.71	248.21	4.23	11.71	362.14	781.05	85.99	72.32	4.68	17.63	3.8	19.92	9.23	31.68	3.79	5.88	2299.66	1219.54	145.57	119.99	352.63	351.95	95.37	95.59
540.358	65.57	6.96	13.23	11.57	9.75	33.73	3.75	5.76	101.12	586.22	6.85	18.93	19.01	254.29	4.31	12.03	357.24	764.09	85.48	72.19	4.3	16.45	3.83	19.94	9.13	32.06	3.79	5.99	2278.2	1201.54	145.61	119.92	346.85	346.49	95.43	95.58
540.703	63.27	7.22	13.02	11.39	8.65	34.95	3.76	5.8	104.88	595.74	7.01	19.44	19.07	258.45	4.34	12.23	349.72	750.67	84.68	71.39	4.76	16.89	3.85	20.04	9.03	32.94	3.88	6.1	2245.76	1182.3	144.85	119.78	342.19	340.93	95.3	95.39
541.049	62.35	7.6	12.77	11.22	8.39	35.35	3.78	5.81	108.78	609.92	7.1	19.91	19.55	263.31	4.35	12.39	341.4	732.15	83.99	70.58	4.04	16.55	3.76	19.95	8.83	35.62	3.84	6.1	2221.28	1164.54	144.52	119.52	335.67	334.85	95.49	95.14
541.395	60.23	7.38	12.53	10.97	8.35	35.61	3.76	5.82	113.42	624.02	7.28	20.43	20.21	269.71	4.45	12.61	335.9	719.73	83.13	69.98	3.86	15.83	3.75	19.85	9.55	34.14	3.89	6.19	2203.92	1150.24	144.07	118.89	330.89	331.79	95.19	95.07
541.74	59.07	6.96	12.38	10.85	9.33	36.63	3.78	5.93	119.54	643.28	7.46	20.93	20.97	276.23	4.44	12.9	333.82	710.39	83	69.6	4.34	16.07	3.82	19.89	8.79	36.18	3.91	6.27	2191.9	1139.04	143.88	119.06	327.95	327.87	95.27	95.52
542.086	60.93	9.84	12.21	10.75	11.43	39.99	3.78	5.93	128.22	668.04	7.68	21.55	23.19	287.65	4.45	13.09	332.7	705.41	82.17	69.02	7.22	20.33	3.82	19.89	12.29	38.62	3.92	6.28	2192.94	1134.74	143.46	118.81	329.41	329.21	95.4	95.5
542.431	56.39	6.9	12.06	10.55	8.17	37.39	3.79	5.97	129.76	671.74	7.8	22.03	21.99	288.55	4.54	13.36	320.48	680.11	81.32	68.43	3.64	16.57	3.83	19.88	9.27	37.72	3.96	6.41	2138.54	1102.4	143.11	118.54	317.31	318.41	95.31	95.34
542.777	55.23	7	11.77	10.33	10.07	37.09	3.87	5.96	134.58	685.88	7.95	22.61	22.45	295.29	4.47	13.61	313.8	666.83	80.53	67.76	3.9	16.45	3.81	19.87	9.01	37.86	3.95	6.44	2113.18	1085.46	142.86	118.39	313.73	313.65	95.29	95.09
543.122	52.95	6.16	11.67	10.21	8.75	37.81	3.79	6	140.04	701.06	8.11	23.2	22.03	299.59	4.54	13.81	307.94	653.79	79.77	66.91	3.7	16.89	3.79	19.76	9.75	38.88	3.94	6.48	2088.06	1070.82	141.93	117.82	309.57	308.41	95.11	95
543.468	53.63	6.02	11.44	10.09	8.53	38.63	3.85	6.11	145.66	722.58	8.36	23.71	22.35	308.03	4.5	14.09	305.52	642.43	79.13	66.53	3.88	17.23	3.84	19.76	9.85	38.4	3.98	6.53	2084.28	1062.72	141.94	117.87	305.97	307.43	95.2	95.35
543.813	51.19	6.76	11.26	9.97	10.21	40.25	3.9	6.18	151.14	738.88	8.52	24.53	23.23	313.13	4.56	14.37	300.3	630.65	78.61	66.01	4.38	17.77	3.84	19.8	10.87	39.62	3.96	6.74	2055.98	1043.76	141.3	117.31	302.33	302.63	95.2	95.1
544.158	49.85	6.62	11.11	9.82	8.41	40.87	3.82	6.25	155.98	756.8	8.77	25.17	24.61	320.21	4.62	14.73	291.46	618.77	77.83	65.36	3.44	16.25	3.83	19.75	10.23	42	3.99	6.8	2035.52	1030.44	140.95	117.25	298.37	297.17	95.28	95.12
544.504	49.49	6.64	10.94	9.74	9.81	41.17	3.95	6.28	162.66	772.46	8.94	25.9	23.95	327.07	4.66	14.98	287.12	602.87	77.03	64.86	4.94	18.05	3.88	19.82	11.11	41.52	4.02	6.9	2010.74	1015.14	140.93	117.06	291.03	293.27	95.3	95.24
544.849	48.71	6.54	10.76	9.59	10.75	42.01	3.9	6.37	169.62	788.42	9.13	26.49	24.73	332.89	4.66	15.34	279.94	591.53	76.59	64.46	3.7	18.11	3.84	19.8	10.97	43	3.98	6.91	1983.98	993.14	140.42	117.11	287.03	287.99	95.23	95.25
545.194	47.35	5.9	10.51	9.35	10.65	41.91	3.88	6.4	178.04	812.8	9.3	27.34	25.91	341.41	4.7	15.57	277.7	582.35	75.58	63.43	5.34	17.93	3.79	19.73	10.71	45.18	3.95	6.97	1976.82	989.24	139.95	116.52	285.95	286.37	95.09	95.31
545.539	46.89	6.06	10.35	9.27	10.75	43.93	3.87	6.45	185.82	841.48	9.54	28.14	27.07	351.65	4.79	15.87	274.04	575.15	74.96	62.95	3.94	18.07	3.82	19.77	11.53	46.18	4.04	7.07	1966.54	984.8	139.42	116.35	283.33	282.69	94.9	94.92
545.884	44.97	6.04	10.25	9.13	9.25	44.91	3.84	6.48	193.22	856.06	9.77	28.86	27.03	356.09	4.81	16.25	268.66	563.59	74.36	62.36	4.06	18.37	3.81	19.71	11.29	47.3	4.06	7.17	1941.78	965.84	139.1	116.21	279.77	278.77	95.15	95.18
546.229	46.97	9.32	10.02	8.9	12.23	46.67	3.86	6.54	201.6	875.74	9.98	29.65	29.91	365.15	4.83	16.55	263.76	550.05	73.65	61.93	6.9	21.65	3.76	19.81	14.03	48.9	3.95	7.22	1911.7	948.86	138.61	116.05	273.95	275.45	95.04	95.15
546.574	45.53	8	9.91	8.82	12.03	46.61	3.88	6.59	211.28	901.24	10.27	30.65	30.55	373.43	4.81	16.93	259.28	541.15	73.03	61.29	6.54	19.51	3.74	19.77	12.79	51.3	4	7.35	1900.32	937.84	138.13	115.67	273.13	271.89	95.01	94.9
546.919	42.35	6.12	9.76	8.75	10.47	45.83	3.91	6.68	216.18	920.06	10.48	31.54	29.79	377.93	4.9	17.26	251.2	526.65	72.5	60.76	4.84	18.31	3.79	19.86	11.81	51.3	4.04	7.52	1871.1	922.54	138.25	115.92	267.03	268.21	95.3	95.39
547.264	40.49	6.12	9.66	8.67	10.29	47.17	3.92	6.74	227.2	945.26	10.84	32.45	29.97	389.23	5.01	17.59	248.26	521.01	71.73	60.11	4.44	18.97	3.84	19.88	12.33	51.88	4.14	7.67	1865.52	915.96	137.51	115.47	265.99	264.31	95.07	95.13
547.609	39.75	4.96	9.57	8.52	9.79	47.41	3.95	6.89	237.36	976.64	11.17	33.53	30.69	401.43	5.04	18.11	243.72	513.15	70.96	59.71	3.96	18.95	3.86	19.89	12.83	53.58	4.13	7.79	1858	911.48	137.28	115.29	263.19	262.85	95.13	95.03
547.954	39.75	6.5	9.31	8.41	11.61	49.09	3.95	6.91	246.82	992.78	11.37	34.38	31.71	405.19	5.11	18.5	238.12	500.07	70.38	59.15	4.64	19.71	3.87	19.86	12.99	53.24	4.11	7.79	1826.26	888.34	136.83	115.13	258.99	259.01	95.15	95.09
548.298	38.57	6.58	9.21	8.31	10.37	48.67	4.03	6.95	253.34	1018.74	11.75	35.4	32.31	414.61	5.12	18.82	234.28	488.23	69.53	58.41	3.64	19.35	3.85	19.96	11.95	54.28	4.19	8	1806.7	878.94	136.5	114.92	253.41	254.53	95.09	95.05
548.643	37.79	5.58	9.01	8.11	10.79	51.37	3.95	7.01	267.92	1052	11.92	36.29	32.83	427.09	5.17	19.27	233.36	483.13	68.69	57.86	4.42	20.03	3.81	20	13.55	56.74	4.16	8.04	1803.1	871.94	135.81	114.25	252.67	252.99	94.75	94.88
548.988	37.89	5.96	8.87	8.08	11.89	51.75	3.97	7.01	277.14	1076.32	12.32	37.51	34.47	435.77	5.13	19.68	226.78	474.97	68.28	57.48	3.98	20.01	3.76	20.02	14.05	58.38	4.09	8.21	1779.16	861.82	135.92	114.44	250.13	249.95	95.23	94.97
549.333	36.25	6.74	8.74	7.89	12.57	52.75	3.96	7.14	290.66	1112.7	12.53	38.69	36.01	448.15	5.14	20.03	224.68	467.71	67.65	56.88	4.82	20.47	3.76	20.11	14.11	59.86	4.12	8.24	1776.28	857.56	135.26	114.43	247.87	248.59	95.29	95.03
549.677	36.01	6.08	8.57	7.79	12.41	53.61	3.88	7.14	301.18	1136.8	12.85	39.74	36.33	454.39	5.2	20.5	219.62	457.07	66.99	56.26	4.32	20.89	3.75	20.08	14.39	60.54	4.14	8.41	1751.5	843.28	135.08	114.16	244.91	243.89	95.14	95.16
550.022	35.59	6.16	8.52	7.78	12.85	54.13	4	7.25	312.08	1156.78	13.17	41.05	37.09	458.91	5.29	20.95	213.52	444.49	66.14	55.63	4.42	20.85	3.78	20.2	15.01	62.36	4.25	8.59	1718.66	824.32	134.59	113.85	240.29	239.75	95.32	95.06
550.366	34.21	5.14	8.3	7.7	11.15	55.07	4	7.35	319.76	1177.46	13.62	42.21	38.19	465.73	5.34	21.48	207.8	433.87	65.47	55.13	3.76	20.89	3.8	20.26	14.83	62.68	4.26	8.67	1687.48	810.1	134	113.68	233.97	234.55	95.13	95.17
550.711	33.69	6.62	8.22	7.49	12.61	57.03	4.01	7.46	338.66	1226.04	13.98	43.64	40.47	483.79	5.35	21.89	207.66	433.57	65.12	54.86	4.6	21.69	3.84	20.29	14.77	65.82	4.21	8.81	1695.52	813.36	134.05	113.53	235.97	235.79	95.34	95.16
551.055	32.77	5.46	8.05	7.4	11.41	57.57	3.98	7.48	350.72	1252.06	14.3	44.84	39.91	493.29	5.43	22.36	200.18	423.81	64.22	54.13	4.54	22.33	3.79	20.45	15.85	66.7	4.21	9.01	1673.28	796.34	133.25	113.31	231.41	230.25	95.08	95.09
551.4	31.77	5.46	7.91	7.25	11.89	58.19	3.92	7.46	364.68	1287.18	14.67	46.18	42.25	501.91	5.51	22.78	199.8	415.01	63.72	53.59	5.08	21.85	3.75	20.4	15.21	69.08	4.2	9.01	1662.98	789.14	133.43	113.37	229.25	228.71	95.29	95.14
551.744	31.17	5.36	7.85	7.3	12.91	59.35	4.09	7.73	378.44	1321.36	15.07	47.39	42.17	512.97	5.65	23.4	194.08	407.51	63.16	53.14	4.2	21.71	3.83	20.53	15.79	69.02	4.23	9.27	1642.36	783.7	132.88	112.98	226.05	227.69	95.16	95
552.088	30.49	5.56	7.82	7.2	13.37	60.05	4.13	7.81	393.98	1352.5	15.57	49.03	44.29	522.15	5.67	23.83	190.42	398.63	62.4	52.65	4.82	22.07	3.85	20.73	16.79	72	4.31	9.49	1624.18	771.16	132.58	113.06	223.59	224.51	95.15	95.02
552.432	30.09	6.42	7.68	7.08	14.61	61.39	4.12	7.92	410.06	1391.26	16.01	50.4	45.37	536.25	5.76	24.38	188.66	391.81	61.75	52.04	4.42	23.31	3.85	20.7	17.83	73.1	4.41	9.7	1609.56	764.38	131.95	112.64	223.47	222.15	95.05	95.09
552.777	30.11	6.02	7.49	6.93	14.79	62.99	4.14	7.97	427.8	1426.36	16.38	51.9	46.99	545.77	5.79	24.81	185.66	384.97	61.04	51.52	4.92	24.27	3.86	20.73	18.47	75.22	4.32	9.71	1594.16	755.68	131.55	112.37	220.29	221.51	94.97	94.89
553.121	29.17	5.38	7.46	6.85	13.45	64.13	4.1	8.01	440.58	1465.4	16.86	53.47	47.79	557.31	5.89	25.37	181.56	377.69	60.64	50.92	3.9	23.33	3.84	20.88	17.71	76.02	4.43	9.9	1584.38	746.1	131.63	112.57	215.47	216.91	95.11	95.14
553.465	30.13	5.44	7.27	6.85	15.39	66.15	4.09	8.1	461.78	1506.84	17.17	55.04	49.91	574.81	5.93	25.84	178.78	373.89	59.86	50.38	4.12	24.51	3.85	20.96	18.73	78.5	4.43	10	1573.64	742.62	130.84	112.31	216.29	215.93	95.03	94.74
553.809	29.51	5.46	7.15	6.76	15.39	65.67	4.16	8.24	475.24	1533.38	17.79	56.67	49.73	576.43	5.96	26.41	174.36	362.83	59.2	49.91	4.08	25.73	3.81	21.1	19.01	81.2	4.48	10.23	1540.48	726.7	130.62	111.88	211.19	211.97	94.98	94.94
554.153	27.99	5.98	7.11	6.68	15.53	67.27	4.13	8.33	495.84	1572.06	18.29	58.23	50.97	589.31	6.01	26.87	170.34	357.17	58.67	49.35	4.16	23.95	3.79	21.18	19.69	82.18	4.42	10.33	1526.8	718.48	129.97	111.62	208.49	209.33	94.77	94.84
554.497	26.65	5.12	6.94	6.54	14.65	69.07	4.13	8.39	515.2	1621	18.72	60.05	53.69	605.21	6.03	27.46	167.88	350.53	58.07	48.9	4.8	25.59	3.78	21.34	19.41	85.06	4.46	10.52	1521.54	715.34	130.07	111.79	207.97	207.61	94.96	94.89
554.841	27.23	5.4	6.96	6.59	16.11	68.97	4.23	8.55	534.68	1660.66	19.43	61.84	54.71	617.31	6.25	28.1	165.68	344.89	57.63	48.58	4.1	26.09	3.88	21.48	20.03	85.56	4.59	10.82	1507.12	705.92	129.76	111.82	205.47	205.75	95.14	95.1
555.185	26.01	5.52	6.78	6.43	16.19	70.97	4.22	8.49	555.38	1698.36	19.89	63.38	55.67	627.07	6.16	28.46	162.4	337.85	56.89	47.84	4.88	26.31	3.78	21.51	21.77	87.28	4.53	10.81	1491.2	699.6	128.98	111.41	202.19	202.23	94.85	94.85
555.529	26.13	5.12	6.75	6.37	17.93	73.61	4.22	8.65	576.46	1741.66	20.38	65.16	57.77	638.91	6.32	29.02	159.36	331.41	56.34	47.5	4.46	26.89	3.79	21.64	21.49	91.2	4.59	11.02	1481.84	691.96	128.91	111.43	200.21	200.67	95.1	94.76
555.873	25.95	4.88	6.55	6.27	17.17	73.75	4.27	8.77	598.84	1784.46	20.98	66.86	58.97	652.27	6.32	29.57	156.32	327.07	55.78	46.96	4.98	26.73	3.81	21.76	21.65	92.96	4.53	11.24	1463.96	684.28	128.46	111.32	198.59	197.89	94.97	95.05
556.217	25.41	5.28	6.59	6.3	17.53	75.23	4.25	8.89	617.9	1827.66	21.71	68.84	62.11	665.29	6.46	30.1	153.9	320.33	55.21	46.54	4.34	27.97	3.86	21.95	22.95	95.26	4.64	11.42	1448.6	678.02	128.13	111.13	196.25	196.39	94.9	94.82
556.56	23.87	4.74	6.46	6.16	17.93	77.75	4.29	9.03	642.84	1873.98	22.23	70.64	62.95	679.85	6.46	30.57	150.94	314.47	54.6	45.9	4.16	27.87	3.79	22.03	23.79	97.94	4.68	11.59	1434.2	671.4	127.62	110.74	194.83	192.95	94.82	94.85
556.904	24.21	5.96	6.41	6.19	19.05	78.11	4.36	9.1	660.34	1898.6	23.01	72.74	65.01	684.21	6.61	31.22	145.78	306.31	53.82	45.59	4.22	27.95	3.82	22.22	23.97	98.54	4.75	11.9	1411.64	655.94	127.75	110.6	190.13	190.53	94.89	94.87
557.248	23.79	4.9	6.28	6.07	19.47	79.91	4.36	9.2	681.08	1932.42	23.61	74.38	66.25	695.79	6.68	31.83	143.4	299.71	53.39	45.11	3.96	28.63	3.85	22.4	24.57	100.76	4.76	12.06	1388.46	645.46	127.16	110.65	186.01	186.75	94.79	94.75
557.591	23.13	5.26	6.2	5.98	20.71	82.49	4.39	9.32	716.62	2003.98	24.14	76.28	69.19	715.59	6.8	32.57	143.64	299.33	52.89	44.66	3.44	30.65	3.82	22.66	26.35	105.14	4.78	12.29	1389.56	647.38	126.87	110.59	187.75	187.81	94.71	94.92
557.935	22.33	4.44	6.15	5.96	21.23	84.23	4.43	9.4	744.94	2053.38	24.95	78.11	71.19	731.33	6.83	33.05	141.68	294.61	52.41	44.19	3.5	29.51	3.82	22.78	27.07	107.12	4.85	12.45	1380.56	644.18	126.41	110.32	186.85	186.65	94.89	94.86
558.278	21.85	4.84	6.07	5.93	20.39	85.01	4.46	9.55	762.02	2078.5	25.75	80.32	72.11	738.53	7.01	33.61	137.14	285.29	51.69	43.84	4.28	30.39	3.85	22.91	27.37	108.66	4.88	12.63	1353.74	628.7	126.14	110.24	181.51	182.71	94.88	94.83
558.622	21.49	4.96	6.03	5.87	22.11	86.79	4.47	9.6	786.28	2122.26	26.33	82.32	74.17	747.77	7.01	34.16	133.22	277.19	51.3	43.27	3.22	30.09	3.81	23.17	28.07	111.28	4.87	12.88	1335.94	621.46	126.09	110.1	178.43	179.87	94.88	94.94
558.965	21.29	4.58	6.01	5.8	22.69	89.53	4.55	9.82	818.98	2173.56	27.21	84.28	78.09	764.89	7.13	34.92	131.28	275.05	50.84	42.9	4.64	32.37	3.82	23.32	29.11	114.84	4.89	13.1	1329.62	619.22	125.79	110.31	178.69	178.91	95	95.11
559.309	21.75	5.26	5.88	5.75	23.41	91.25	4.53	9.85	849.28	2230.02	28.02	85.78	81.57	780.55	7.26	35.32	130.54	270.79	50.08	42.33	4.56	32.67	3.8	23.53	29.73	118.7	5.01	13.27	1323.92	615.08	125.24	109.78	177.31	177.07	94.69	94.8
559.652	20.63	5.42	5.82	5.76	23.63	92.97	4.63	10.05	879.04	2279.16	28.8	87.89	82.91	795.89	7.39	35.99	128.34	267.51	49.61	41.92	4.9	33.55	3.85	23.71	31.67	122.32	5.02	13.48	1313.58	609.44	124.89	109.57	175.55	175.63	94.72	94.74
559.995	21.09	4.36	5.72	5.69	24.13	95.11	4.57	10.12	904.06	2313.36	29.42	89.88	85.67	804.75	7.45	36.51	125.82	260.95	49	41.38	4.36	33.69	3.77	23.85	32.87	124.02	5.07	13.64	1292.58	599.3	124.36	109.55	172.05	172.85	94.58	94.63
560.339	20.97	5.42	5.73	5.63	26.13	97.89	4.69	10.3	939.44	2367.8	30.38	91.7	89.01	818.47	7.57	37.17	123.2	255.33	48.48	40.98	5.38	36.27	3.85	24.1	33.95	126.08	5.19	13.99	1283.18	596.42	124.17	109.42	172.01	171.73	94.66	94.68
560.682	20.67	5.5	5.62	5.6	27.39	99.77	4.74	10.48	966.58	2409.14	31.44	93.76	91.49	830.97	7.73	37.84	121.2	252.99	48.17	40.65	4.56	36.19	3.87	24.45	36.09	129.98	5.23	14.31	1266.2	588.74	124.07	109.49	169.31	169.43	94.86	94.86
561.025	20.37	5.06	5.63	5.58	28.83	101.13	4.76	10.59	994.08	2446.26	32.32	95.77	94.75	844.27	7.84	38.57	118.82	247.03	47.56	40.09	4.96	36.39	3.86	24.61	36.07	132.38	5.26	14.52	1248.94	577.8	123.92	109.45	165.05	166.37	94.9	94.87
561.368	19.23	4.94	5.56	5.5	28.57	103.53	4.76	10.77	1025.52	2480.28	33.16	97.68	96.23	855.41	7.94	39.07	115.16	240.71	47.11	39.89	4.8	36.19	3.84	24.78	36.69	135	5.29	14.76	1233.68	571.9	123.58	109.15	163.29	164.85	94.87	94.7
561.711	19.97	4.3	5.49	5.49	29.57	106.15	4.85	10.93	1062.4	2537.78	34.2	99.65	101.09	874.27	8.03	39.78	114.36	237.47	46.51	39.36	4.52	37.17	3.84	24.97	39.37	139.94	5.35	14.97	1227.96	568.36	123.48	109.11	163.75	163.41	94.83	94.82
562.054	19.99	6.02	5.46	5.41	31.55	109.59	4.91	11.02	1096.26	2583.36	35.15	101.39	106.25	888.89	8.2	40.3	112.34	233.25	46.07	38.93	5.26	38.23	3.87	25.27	40.69	142.78	5.39	15.24	1216.28	562.64	122.81	109.02	160.75	162.49	94.8	94.68
562.397	18.47	4.74	5.4	5.42	31.57	112.67	4.97	11.22	1131	2633.12	36.07	103.33	108.85	903.77	8.33	40.91	110.16	228.69	45.61	38.6	5.24	40.03	3.89	25.55	42.23	146.92	5.45	15.51	1203.8	556.38	122.7	108.79	159.69	160.43	94.71	94.62
562.74	18.05	4.66	5.39	5.44	33.63	114.89	5.06	11.44	1163.94	2676.34	37.27	105.45	112.01	918.43	8.48	41.59	107.66	224.87	45.14	38.12	4.86	39.99	3.87	25.92	43.45	150.28	5.64	15.82	1193.12	551.18	122.48	108.8	156.55	157.33	94.79	94.73
563.083	18.39	4.84	5.3	5.31	35.43	117.11	5.06	11.59	1203.8	2729.5	38.28	107.22	116.73	937.85	8.61	42.18	105.98	222.83	44.6	37.71	4.08	40.91	3.8	26.2	45.43	154.18	5.62	16.1	1185.6	547.54	122.32	108.77	156.11	156.95	94.9	94.71
563.426	18.75	4.72	5.25	5.29	36.23	118.43	5.18	11.75	1227.12	2739.5	39.27	109.06	119.99	944.33	8.82	42.93	104.26	214.49	44.14	37.25	4.6	41.35	3.85	26.48	46.87	156.24	5.76	16.28	1156	534.88	122.06	108.59	151.11	152.75	94.88	94.8
563.769	18.01	5.1	5.22	5.26	39.21	122.23	5.21	11.91	1268.66	2787.2	40.4	111	125.51	963.71	8.97	43.63	102	213.27	43.59	36.89	6.02	42.79	3.88	26.67	49.87	161.98	5.84	16.59	1150.52	531.18	121.6	108.61	152.07	153.73	94.83	94.69
564.112	17.05	4.64	5.29	5.4	39.41	127.41	5.27	12.17	1317.92	2856.58	41.6	112.68	130.73	985.17	9.23	44.32	101.66	210.69	43.14	36.51	4.76	43.71	3.88	27.07	50.29	169.66	6	17.05	1150.38	532.42	121.35	108.54	150.95	152.45	94.9	94.82
564.454	17.41	4.64	5.23	5.23	40.17	130.21	5.37	12.34	1346.14	2878.72	42.67	114.25	135.23	996.37	9.37	45.05	97.82	205.55	42.76	36.17	4.6	45.17	3.86	27.36	53.31	169.34	6	17.27	1132.2	523.32	121.13	108.34	148.47	148.07	94.88	94.84
564.797	16.47	4.88	5.17	5.22	42.41	133.55	5.41	12.59	1388.8	2923.9	43.91	115.93	141.05	1015.31	9.53	45.67	96.56	202.79	42.23	35.75	4.72	44.69	3.9	27.64	55.53	176	6.1	17.54	1122.64	520.34	120.93	108.23	147.01	146.93	94.88	94.72
565.14	17.17	5	5.13	5.21	43.37	136.67	5.46	12.72	1422.86	2950.08	45.08	117.59	145.23	1027.63	9.75	46.36	94.74	198.03	41.76	35.36	6.58	45.93	3.88	27.99	57.53	179.36	6.17	17.87	1105.72	514.42	120.79	108.07	144.99	144.59	94.78	94.78
565.482	16.35	4.82	4.98	5.13	46.47	140.49	5.56	12.95	1465.38	2996.68	46.15	119.28	150.27	1048.93	9.91	47.14	92.92	195.21	41.16	34.94	4.84	47.27	3.88	28.28	59.05	185.6	6.34	18.22	1095.12	509.04	120.48	107.9	143.69	143.65	94.65	94.61
565.825	16.05	4.18	5.01	5.15	47.13	141.73	5.6	13.19	1495.5	3011.6	47.57	121.08	156.89	1060.57	10.16	47.81	90.42	190.05	40.74	34.51	5.48	47.89	3.89	28.63	62.31	187.96	6.46	18.67	1080.78	500.04	120	108	141.41	140.85	94.76	94.64
566.168	16.59	5.38	5.01	5.16	49.51	145.87	5.75	13.48	1543.36	3051.28	48.75	122.48	163.79	1082.07	10.34	48.67	88.28	186.65	40.37	34.21	5.68	48.77	3.86	28.93	64.69	195.5	6.56	18.96	1073.96	496.3	119.98	107.7	140.19	140.75	94.72	94.71
566.51	16.31	4.94	4.96	5.09	50.93	150.39	5.83	13.67	1577.74	3073.98	49.98	123.91	169.73	1099.05	10.64	49.27	88.02	184.01	39.88	33.74	4.76	50.57	3.89	29.39	66.81	199.94	6.68	19.27	1061.02	489.54	119.56	107.71	137.47	138.25	94.62	94.65
566.852	15.75	4.28	4.99	5.1	52.89	152.47	5.9	13.94	1611.18	3088.4	51.3	125.54	174.49	1108.87	10.87	50.08	85.26	176.77	39.42	33.38	4.5	50.47	3.89	29.78	68.73	203.18	6.75	19.64	1044.26	483.98	119.52	107.62	134.93	136.73	94.72	94.69
567.195	16.05	4.98	4.99	5.11	56.33	159.83	6.07	14.27	1667.5	3146.86	52.72	126.87	183.27	1137.47	11.12	50.89	84.16	176.97	39.13	33.12	5.04	51.95	3.89	30.13	73.01	212.06	6.94	20.1	1041.2	482.62	119.17	107.65	135.93	135.73	94.78	94.67
567.537	16.03	4.78	4.88	5.03	58.97	162.75	6.11	14.51	1705.38	3166.64	54.06	128.38	189.97	1154.51	11.33	51.73	82.22	173.97	38.66	32.66	6	54.19	3.89	30.52	75.91	217.98	7.1	20.4	1028.42	476.94	119.22	107.68	133.17	133.41	94.62	94.74
567.88	14.85	5.44	4.85	5.03	60.63	166.53	6.26	14.75	1742.5	3184.08	55.32	129.53	195.33	1168.49	11.74	52.43	80.56	169.27	38.23	32.28	5.64	55.09	3.88	30.94	79.01	222.42	7.24	20.78	1017.88	468.72	119.02	107.31	131.27	131.39	94.63	94.69
568.222	17.11	6.88	4.86	5.01	65.17	173.29	6.43	15.12	1787.52	3210.32	56.9	131.13	206.65	1193.33	12.09	53.47	81.9	168.35	37.76	31.97	7.74	57.45	3.93	31.45	84.51	229.94	7.41	21.34	1007.9	465.78	118.85	107.27	133.85	132.21	94.62	94.9
568.564	15.35	4.8	4.81	5	65.71	175.51	6.52	15.4	1824.12	3227.22	58.33	132.27	212.47	1207.83	12.32	54.35	78.48	162.77	37.39	31.67	5.58	57.55	3.94	31.91	85.79	234.26	7.57	21.79	995.4	459.8	118.5	107.49	128.17	127.85	94.89	94.87
568.906	14.33	4.58	4.8	4.95	68.55	180.39	6.63	15.63	1866.62	3253.08	59.64	133.04	220.71	1226.17	12.67	55.01	77.54	160.45	36.8	31.04	4.64	58.11	3.91	32.27	87.43	240.54	7.7	22.22	981.14	454.04	118.01	106.98	126.51	126.53	94.55	94.57
569.248	14.09	4.56	4.74	4.97	71.55	186.17	6.7	15.97	1908.46	3264.88	61.15	134.22	231.17	1248.03	13.01	55.91	76.14	157.13	36.28	30.85	6.04	60.29	3.91	32.68	93.53	247	7.78	22.73	968.82	448.18	117.89	106.82	124.79	126.19	94.62	94.65
569.59	14.77	4.28	4.8	5	74.59	190.35	6.96	16.47	1955.06	3291.98	62.49	135.62	241.07	1266.83	13.4	56.87	74.92	154.45	36.02	30.55	6.16	60.99	3.95	33.34	97.07	253.72	8.03	23.3	964.84	444.86	117.94	107.11	123.07	123.63	94.86	94.71
569.933	14.33	3.64	4.78	4.9	76.39	193.29	7.04	16.73	1984.7	3283.46	64	136.64	248.75	1281.79	13.61	57.91	71.8	149.67	35.65	30.17	5.48	61.63	3.92	33.71	100.39	258.52	8.26	23.76	944.84	435.54	117.63	106.95	121.69	121.61	94.66	94.82
570.275	13.85	4.74	4.66	4.9	80.09	199.17	7.25	17.12	2025.98	3293.22	65.7	137.61	259.23	1303.73	14.05	58.95	70.34	146.69	35.21	29.82	5.38	63.41	3.98	34.35	104.49	266.38	8.37	24.25	936.06	431.84	117.42	106.79	119.83	120.03	94.66	94.89
570.616	13.41	5.02	4.66	4.92	83.31	205.21	7.35	17.66	2072.98	3305.16	67.44	139.05	268.17	1323.85	14.46	60.02	69.3	143.77	35.01	29.46	5.72	64.71	4	35	109.05	273.96	8.59	24.86	922.5	426.44	117.57	107.03	117.99	119.27	94.97	94.71
570.958	14.23	4.48	4.68	4.87	86.35	211.05	7.5	17.9	2121.18	3330.92	68.5	139.18	279.47	1349.13	14.77	60.53	68.54	142.13	34.35	29.12	6.52	67.13	4.02	35.29	113.77	280.78	8.8	25.3	913.54	422.1	116.71	106.56	117.77	118.59	94.36	94.4
571.3	16.65	6.74	4.74	4.92	92.89	220.17	7.72	18.36	2169.66	3332.3	70.45	140.74	293.11	1374.17	15.28	61.95	69.86	141.27	34.06	28.85	9.42	70.03	4.04	35.99	119.91	292.78	9	25.92	907.04	419.24	116.88	106.91	118.27	118.43	94.68	94.79
571.642	14.13	5.02	4.67	4.91	94.67	222.41	7.88	18.89	2213.76	3340.06	72.07	141.1	301.63	1397.71	15.7	62.84	66.54	136.93	33.67	28.67	6.18	69.31	4.04	36.58	123.65	296.94	9.31	26.64	892.6	412.36	116.6	106.59	113.69	115.25	94.86	94.79
571.984	13.29	4.76	4.64	4.82	98.05	228.25	8.07	19.29	2251.94	3338.36	73.48	141.99	313.25	1408.43	16.19	63.9	64.44	133.51	33.28	28.13	6.62	70.83	4.02	37.18	128.67	304.88	9.49	27.14	880.12	405.54	116.36	106.57	113.77	112.29	94.61	94.64
572.326	12.95	4.92	4.64	4.83	103.13	233.75	8.25	19.73	2296.32	3342	75.4	142.91	325.85	1435.43	16.65	64.95	63	130.91	32.85	27.82	6.46	72.85	3.98	37.71	134.75	313.28	9.71	27.82	870.04	400.72	116.41	106.66	111.29	111.49	94.86	94.79
572.667	13.79	5.42	4.54	4.77	106.87	239.49	8.42	20.24	2334.66	3330.4	76.96	143.69	338.09	1453.03	17.12	66.19	62.12	128.45	32.4	27.49	5.76	74.41	4	38.27	139.27	322.34	9.92	28.52	858.02	395.32	116.12	106.42	109.55	109.17	94.74	94.81
573.009	12.67	5.14	4.61	4.79	111.47	245.63	8.67	20.71	2380.38	3341.98	78.61	144.12	350.33	1478.31	17.73	67.23	60.08	125.29	32	27.09	5.66	75.31	4.06	38.98	145.25	329.72	10.24	29.27	849.02	391.68	115.95	106.61	107.31	108.15	94.73	94.81
573.351	11.93	5.1	4.59	4.8	115.37	251.21	8.83	21.21	2419.54	3327.32	80.45	145.01	364.69	1496.97	18.23	68.38	58.78	121.59	31.59	26.76	5.74	76.37	4.01	39.65	150.87	337.74	10.51	29.84	834.24	383.94	115.84	106.26	105.87	106.57	94.61	94.66
573.692	11.93	5.14	4.56	4.78	120.33	257.33	9.01	21.73	2469.62	3323.22	82.06	145.08	378.23	1519.73	18.67	69.48	58.06	120.03	31.17	26.43	6.3	77.91	4.04	40.27	157.31	346.42	10.76	30.6	826.18	379.62	115.19	105.92	103.75	104.21	94.4	94.52
574.034	13.11	5	4.52	4.78	125.31	266.09	9.26	22.38	2510.12	3318.38	83.92	145.93	392.61	1544.47	19.39	70.84	56.78	117.55	30.9	26.17	7.7	80.81	4.01	40.91	164.33	356.38	10.98	31.38	816.2	374.02	115.53	106.26	103.65	104.75	94.56	94.49
574.375	12.23	5.1	4.54	4.75	129.91	270.33	9.52	22.91	2548.72	3302.04	85.67	145.96	407.05	1564.97	19.98	71.89	55.74	114.45	30.4	25.73	7.04	82.97	4.06	41.59	170.45	365.82	11.32	32.09	801.82	370.62	115	106.04	101.73	101.07	94.51	94.58
574.717	11.89	4.18	4.54	4.7	136.11	279.09	9.69	23.65	2598.8	3303.52	87.43	146.79	422.39	1588.49	20.53	73.2	54.2	111.95	30.24	25.44	6.52	83.45	4.03	42.3	178.07	376.38	11.66	32.97	793.94	366	115.14	106.07	100.75	99.47	94.6	94.62
575.058	10.95	4.72	4.5	4.77	140.59	283.83	9.98	24.27	2639	3282.4	89.3	147.19	438.15	1609.67	21.19	74.33	53.16	109.85	29.73	25.18	6.36	85.23	4.08	43.05	185.25	386.06	11.98	33.89	781.28	360.28	114.73	105.86	99.59	98.33	94.6	94.5
575.399	12.03	4.14	4.48	4.71	146.33	293.31	10.25	24.95	2691.08	3285.6	91.12	147.79	457.19	1638.13	21.86	75.78	52.06	107.27	29.33	24.84	5.86	87.75	4.05	43.94	192.03	396.58	12.36	34.62	775.06	357.18	114.67	105.96	96.89	97.67	94.56	94.58
575.741	11.63	5.78	4.53	4.76	152.71	300.13	10.55	25.67	2723.46	3260.52	93.3	148.12	472.75	1657.63	22.55	77.33	52.34	106.29	28.98	24.64	7.38	89.59	4.15	44.71	200.43	406.86	12.76	35.62	763.72	351.7	114.87	106.05	95.55	97.13	94.76	94.69
576.082	11.99	4.9	4.51	4.76	159.51	311.61	10.8	26.31	2780.78	3272.38	94.97	148.3	492.63	1687.19	23.23	78.45	50.34	103.71	28.66	24.18	7.72	91.87	4.12	45.4	210.37	421.28	13.06	36.34	756.66	345.96	114.31	105.87	95.15	94.79	94.61	94.62
576.423	11.27	4.38	4.52	4.74	165.23	316.55	11.12	27.02	2825.04	3256.76	96.89	148.91	510.99	1710.53	24.09	79.84	48.56	100.79	28.3	23.97	6.44	94.51	4.13	46.32	217.57	429.86	13.39	37.41	748.48	342.14	114.22	105.78	93.97	94.07	94.64	94.73
576.764	13.15	6.66	4.45	4.7	173.55	323.57	11.39	27.71	2845.18	3215	98.91	148.93	528.19	1723.03	24.88	81.04	49.8	100.07	27.9	23.66	8.1	97.23	4.1	47	227.47	440.18	13.76	38.3	733.72	335.46	114.03	105.75	94.61	93.39	94.66	94.67
577.105	13.49	7.26	4.44	4.7	180.99	333.65	11.65	28.57	2894.44	3201.36	100.81	149.25	545.23	1750.43	25.59	82.53	49.36	97.49	27.56	23.32	9.02	100.23	4.11	47.93	236.45	452.64	14.19	39.46	724.12	331.8	113.91	105.59	92.55	92.99	94.47	94.59
577.447	11.39	4.84	4.43	4.69	184.81	338.09	12	29.47	2925.56	3177.74	102.96	149.37	565.61	1767.07	26.5	83.83	45.54	93.73	27.24	23.07	8.02	100.31	4.12	48.74	242.19	462.7	14.61	40.58	708.56	325.06	113.79	105.55	89.63	88.81	94.72	94.6
577.788	11.49	4.66	4.44	4.73	192.03	346.29	12.35	30.27	2972.22	3160.38	105.36	150.07	583.45	1795.09	27.28	85.64	45.12	90.97	26.86	22.86	7.62	102.01	4.22	49.68	251.47	477.12	15.1	41.63	699.84	321.38	113.83	105.72	87.77	87.65	94.85	94.87
578.129	11.05	4.44	4.4	4.63	201.69	356.17	12.61	31.17	3020.26	3153.28	107.22	150.21	610.11	1819.35	28.26	87.04	44.08	88.07	26.48	22.53	7.32	104.51	4.13	50.68	263.47	488.72	15.5	42.69	692.78	317.14	113.73	105.7	86.83	86.63	94.9	95
578.47	10.17	5.26	4.37	4.67	207.37	364.41	12.98	32.04	3053.3	3122.02	109.11	149.81	628.67	1841.63	29.18	88.35	43.86	86.85	26.08	22.12	7.7	105.81	4.16	51.44	271.85	499.7	15.96	43.7	681.62	312.14	113.43	105.29	85.23	84.61	94.69	94.66
578.81	11.13	4.86	4.37	4.66	216.69	374.71	13.28	32.95	3098.64	3114.54	111.18	150.2	653.31	1866.01	30.06	89.9	41.98	86.33	25.83	21.87	8.38	108.25	4.12	52.38	286.55	511.38	16.37	44.85	674.6	306.98	113.26	105.35	84.27	85.07	94.62	94.44
579.151	10.85	3.6	4.38	4.64	224.29	378.91	13.68	34.05	3118.6	3068.8	113.32	150.33	673.09	1881.39	31.16	91.21	40.88	82.65	25.51	21.62	8.48	110.55	4.19	53.36	295.13	523.98	16.9	46.09	663.26	303.36	113.11	105.45	82.89	82.31	94.71	94.66
579.492	10.33	4.5	4.4	4.63	233.51	391.13	14.09	35.03	3165.08	3061.82	115.51	150.57	699.31	1911.31	32.2	93.05	39.96	80.95	25.16	21.31	7.98	113.21	4.2	54.35	308.03	538.58	17.43	47.42	654.86	299.32	113.21	105.32	82.61	80.39	94.73	94.81
579.833	10.43	4.5	4.36	4.62	241.05	402.23	14.47	35.9	3202.9	3030.38	117.46	150.44	722.25	1929.31	33.27	94.59	39.54	80.33	24.69	20.99	6.74	113.47	4.22	55.27	318.77	551.42	18.01	48.69	644.22	292.28	112.88	105.36	78.95	78.89	94.64	94.64
580.174	9.75	4.68	4.39	4.62	251.59	409.89	14.93	37.18	3236.5	3006.56	119.53	150.29	744.19	1952.15	34.36	96.06	38	76.85	24.52	20.69	7.6	118.21	4.29	56.29	330.91	566.18	18.56	49.94	633.88	288.72	112.55	105.12	78.27	79.37	94.42	94.5
580.514	10.03	4.64	4.31	4.55	260.35	418.33	15.32	38.19	3267.84	2985.22	121.78	150.35	772.09	1969.79	35.5	97.8	38.16	76.05	24.08	20.39	7.8	120.13	4.19	57.2	343.43	580.12	19.08	51.37	625.14	283.74	112.61	105.14	77.41	77.83	94.61	94.52
580.855	10.49	4.36	4.31	4.65	268.35	427.31	15.76	39.45	3300.68	2956.08	123.92	150.41	796.49	1988.53	36.71	99.29	36.88	73.31	23.81	20.06	8	121.89	4.2	58.38	355.05	591.86	19.63	52.65	614.94	279.78	112.45	105.1	76.03	75.97	94.51	94.58
581.196	9.71	3.92	4.38	4.66	280.63	438.71	16.12	40.56	3349.64	2943.04	125.62	150.27	829.07	2018.39	38	100.77	35.96	73.07	23.48	19.82	8.44	124.41	4.28	59.38	370.97	605.56	20.29	54.09	610.96	276.02	112.37	104.84	74.71	75.71	94.41	94.26
581.536	10.31	4.44	4.35	4.65	289.87	448.53	16.66	41.79	3363.8	2902.44	128.31	150.35	853.59	2028.37	39.34	102.47	35.48	69.77	23.21	19.55	7.96	126.51	4.31	60.46	382.87	619.64	20.89	55.44	596.82	269.76	112.14	105.08	73.55	74.01	94.49	94.56
581.877	9.37	3.38	4.38	4.63	299.85	459.33	17.02	43.03	3405.16	2889.56	130.08	150.15	882.13	2056.73	40.5	104.01	34	68.73	22.77	19.36	7.86	129.41	4.28	61.43	397.73	636.74	21.46	56.92	592.36	268.26	111.97	105.04	72.71	73.19	94.38	94.48
582.217	10.71	4.1	4.33	4.64	313.19	471.09	17.62	44.32	3440.84	2863.38	132.19	150.16	916.15	2077.45	41.96	105.55	33.36	67.79	22.46	19.06	8.42	131.75	4.29	62.69	414.79	651.06	22.19	58.42	582.48	262.64	111.88	104.79	72.71	72.15	94.46	94.47
582.558	9.11	4.16	4.33	4.64	325.37	480.91	18.06	45.8	3464.88	2834.16	134.39	150.18	942.83	2093.57	43.47	107.4	32.76	65.31	22.15	18.67	8.4	134.19	4.35	63.79	429.37	667.9	22.91	60.1	574.9	259.94	111.85	104.77	71.63	71.25	94.57	94.58
582.898	10.03	5.14	4.41	4.68	335.93	492.17	18.63	47.1	3491.84	2803.24	136.43	150.03	975.91	2112.01	44.96	108.81	32.52	63.87	21.84	18.53	9.88	137.67	4.43	64.98	443.69	682.36	23.62	61.65	567.58	256.52	111.76	104.81	70.37	70.75	94.65	94.77
583.238	9.21	3.86	4.26	4.57	348.71	506.97	19.07	48.5	3543.8	2794.68	138.74	150.16	1016.51	2143.13	46.55	110.91	31.14	62.09	21.49	18.15	9.04	140.63	4.38	65.86	464.79	700.3	24.41	63.34	562.54	252.96	111.62	104.82	68.79	68.53	94.67	94.63
583.579	9.51	3.74	4.25	4.6	361.37	516.53	19.64	49.92	3556.9	2762.86	140.53	150.02	1043.15	2157.41	48.09	112.4	29.98	60.55	21.1	17.93	8.5	142.61	4.32	67.06	479.17	716.46	25.12	65.05	553.52	248.74	111.52	104.77	67.85	68.29	94.35	94.49
583.919	9.95	4.4	4.3	4.57	371.99	529.29	20.12	51.45	3565.24	2724.98	142.83	149.75	1074.57	2166.75	49.73	113.96	29.72	60.05	20.85	17.77	10.1	145.95	4.4	68.16	498.59	729.7	26.02	66.72	543.62	244.04	111.44	104.64	67.27	66.87	94.56	94.49
584.259	8.15	4.12	4.26	4.59	387.21	538.75	20.76	52.93	3591.92	2701.8	144.73	149.46	1108.01	2184.79	51.45	115.29	28.46	58.03	20.54	17.44	10.18	148.17	4.37	69.45	514.35	746.08	26.82	68.29	536.5	240.46	111.45	104.55	65.43	66.11	94.48	94.62
584.599	8.95	3.84	4.24	4.6	400.59	553.75	21.29	54.59	3625.32	2681.72	146.47	149.25	1149.95	2207.03	53.19	117	28.82	57.47	20.29	17.14	8.8	150.75	4.45	70.6	536.31	764.16	27.65	70.14	530.74	237.72	111.35	104.67	65.37	65.57	94.5	94.36
584.939	9.99	5.36	4.3	4.62	414.75	565.21	21.79	56.15	3642.56	2655.62	148.43	149.12	1185.41	2226.61	55.12	118.59	29.08	56.87	20.12	16.92	10.36	154.93	4.46	71.71	558.27	781.46	28.58	71.93	522.72	235.68	110.93	104.45	64.67	65.65	94.42	94.47
585.279	9.13	4.26	4.31	4.56	430.31	581.81	22.41	57.75	3677.56	2638.34	150.33	148.6	1231.43	2250.47	56.71	120.11	28.12	54.79	19.69	16.68	9.5	158.17	4.47	72.93	578.37	798.32	29.54	73.47	515.62	231.44	110.91	104.38	64.21	63.85	94.3	94.5
585.619	8.65	4.74	4.25	4.6	442.75	592.01	23.03	59.49	3673.64	2590.24	152.14	148.68	1255.33	2246.13	58.87	121.81	27.28	51.79	19.38	16.43	9.42	158.71	4.46	73.98	596.01	811.62	30.59	75.42	505.52	225.82	110.8	104.43	62.11	61.91	94.4	94.44
585.959	8.21	4.56	4.3	4.64	461.35	609.29	23.63	61.21	3703.82	2577.22	153.98	148.4	1299.43	2263.39	60.86	123.37	25.96	52.21	19.06	16.16	9.74	162.23	4.51	75.29	618.91	831.3	31.56	77.21	500.26	221.5	110.8	104.37	61.31	61.37	94.46	94.57
586.299	9.03	5.38	4.24	4.61	480.63	626.23	24.33	62.97	3741.82	2570.84	156.02	148.29	1348.85	2296.83	62.99	124.87	26.5	51.47	18.74	15.99	9.98	168.13	4.52	76.77	647.87	856.26	32.63	79	496.24	222.58	110.51	104.31	62.81	61.51	94.49	94.48
586.639	9.29	3.96	4.21	4.5	494.31	638.39	24.83	64.7	3732.54	2528.8	157.67	147.99	1381.25	2294.85	64.98	126.3	25.76	49.33	18.49	15.72	10.62	168.11	4.47	77.56	665.69	865.28	33.71	81.02	487.86	217.24	110.33	104.21	60.87	60.07	94.38	94.35
586.979	8.87	4.04	4.23	4.61	508.53	646.61	25.75	66.7	3726.42	2488.76	159.6	148.08	1413.75	2290.51	67.35	127.99	25.04	47.47	18.27	15.55	11.48	170.99	4.53	79.05	684.35	877.54	34.83	83.08	479.62	212.54	110.54	104.57	60.27	60.03	94.5	94.8
587.319	8.67	3.66	4.21	4.57	524.05	662.63	26.33	68.44	3742.88	2463.7	161.14	147.51	1457.91	2305.79	69.49	129.1	25.06	46.19	17.96	15.16	10.56	174.07	4.55	79.98	710.39	894.64	36.06	84.51	472.84	210.08	110.16	104.35	58.33	58.13	94.44	94.41
587.659	8.53	3.76	4.23	4.6	543.91	678.41	26.97	70.34	3756.62	2441.32	162.51	147.22	1504.67	2319.17	71.6	130.49	22.26	45.17	17.73	14.97	10.06	177.11	4.61	81.36	736.57	914.52	37.44	86.32	466.5	205.98	110.14	104.11	56.75	57.57	94.5	94.43
587.998	8.25	4.72	4.21	4.53	559.13	691.17	27.68	72.21	3744.52	2405.24	164.16	146.93	1536.27	2313.89	74.02	131.9	22.88	44.83	17.35	14.82	11.48	178.59	4.61	82.51	759.49	922	38.57	88.37	458.18	203.66	110.18	104.1	55.47	56.11	94.41	94.37
588.338	8.59	4.72	4.21	4.54	585.51	717.47	28.43	74.21	3786.92	2401.36	165.85	147.04	1594.79	2346.81	76.23	133.27	22.28	44.63	17.12	14.53	12.74	183.79	4.59	83.71	794.95	950.1	40.01	90.56	456.02	202.46	110.11	104.24	56.75	56.51	94.55	94.67
588.678	7.95	3.62	4.22	4.49	600.45	731.57	29.25	76.15	3791.2	2380.12	167.41	146.82	1637.01	2352.61	78.88	134.83	22.22	41.45	16.7	14.3	10.34	185.91	4.61	84.92	822.49	968.4	41.35	92.42	449.58	200.06	110.04	104.36	55.05	54.45	94.52	94.59
589.017	8.77	3.72	4.2	4.51	621.01	747.63	29.94	78.05	3785.26	2351.64	168.5	146.13	1677.59	2349.15	81.17	135.75	22.42	43.11	16.54	14.13	11.98	189.89	4.7	86.03	847.05	984.36	42.81	94.19	444.66	196.46	109.74	103.97	54.61	54.33	94.48	94.32
589.357	8.29	4.74	4.19	4.45	640.77	763.27	30.74	80.02	3781.92	2325.18	169.65	146.1	1725.43	2355.89	83.65	136.87	22.2	41.23	16.37	13.9	10.48	193.11	4.65	87.17	876.33	996.88	44.3	96.27	438.12	192.26	109.76	104.08	53.75	54.47	94.49	94.32
589.696	7.89	4.26	4.16	4.51	663.67	782.75	31.65	82.14	3790.26	2298.88	171.19	145.77	1768.69	2353.45	86.28	138.13	20.9	39.91	16.09	13.61	11.2	195.69	4.72	88.43	908.71	1012.92	45.83	98.06	433.08	189.44	109.82	103.92	53.23	53.15	94.4	94.41
590.036	7.85	4.56	4.2	4.5	682.97	799.67	32.39	84	3780.56	2272.62	172.16	145.22	1810.29	2357.77	88.82	139.33	20.74	38.87	15.86	13.48	11.7	199.59	4.76	89.49	937.95	1025.12	47.36	99.99	427.08	186.68	109.54	103.79	52.45	52.41	94.38	94.45
590.375	7.21	4.26	4.2	4.53	705.83	820.11	33.13	86.04	3788.68	2253.38	173.26	144.99	1861.17	2363.19	91.28	140.13	20.22	38.47	15.52	13.25	12.02	202.17	4.73	90.65	969.89	1047.02	49.08	101.75	421.58	183.6	109.34	103.86	51.27	51.07	94.31	94.48
590.715	8.01	4.16	4.16	4.49	731.09	841.59	34.25	88.27	3786.22	2237.22	174.78	145.07	1901.73	2370.85	94.27	141.74	19.06	36.93	15.44	13.04	11.96	204.31	4.77	92.06	1003.23	1062.94	51.02	103.9	415.06	181.38	109.67	104.34	51.15	50.49	94.61	94.74
591.054	8.75	4.38	4.14	4.53	755.15	860.67	35.06	90.3	3785.76	2215.66	175.47	144.46	1954.19	2371.57	96.77	142.42	19.34	36.13	15.13	12.84	11.98	209.33	4.78	92.85	1041.75	1079.1	52.67	105.64	413.62	179.64	109.13	103.81	51.25	51.05	94.27	94.6
591.393	8.75	4.88	4.15	4.49	776.25	877.35	36.03	92.2	3766.12	2187.9	176.47	144.3	1992.87	2365.93	99.5	143.5	20.06	37.01	14.81	12.58	12.62	211.95	4.77	93.86	1071.79	1091.02	54.49	107.42	406.32	177.34	109.47	103.94	50.61	51.21	94.45	94.5
591.732	7.49	3.84	4.21	4.55	808.55	904.83	37.05	94.36	3788.6	2180.44	177.2	143.88	2059.59	2381.45	102.48	144.51	17.8	34.57	14.59	12.44	13.52	215.45	4.88	95.02	1114.33	1113.72	56.35	109.44	403.02	176.72	109.15	104.09	49.73	48.89	94.76	94.52
592.072	7.39	3.72	4.17	4.56	831.15	922.21	38.12	96.21	3773.02	2146.34	178.02	143.58	2093.43	2370.97	105.18	145.02	17.94	34.65	14.44	12.22	12.9	217.47	4.83	96.12	1146.91	1122.38	58.27	111.15	397.94	173.56	109.15	103.81	47.89	48.37	94.43	94.47
592.411	7.77	4.2	4.28	4.52	858.95	941.79	39.19	98.39	3764.76	2129.54	178.54	143.02	2145.85	2369.29	107.84	146.07	18.12	33.41	14.19	12.04	12.68	221.39	4.93	97.28	1188.35	1140.14	60.43	112.78	392.92	170.8	108.85	103.77	47.95	47.47	94.51	94.32
592.75	8.27	3.1	4.2	4.52	889.73	968.43	40.36	100.35	3759.9	2112.4	179.15	142.78	2198.01	2373.89	110.76	146.37	17.04	32.79	13.96	11.88	14.04	226.85	4.91	98.24	1228.99	1154.26	62.47	114.53	389.02	170	108.88	103.58	48.27	47.63	94.37	94.56
593.089	7.31	5.16	4.18	4.51	909.29	982.15	41.46	102.55	3726.6	2080.42	179.83	142.75	2235.05	2352.37	113.82	147.33	16.82	32.31	13.77	11.62	13.88	228.35	4.89	99.27	1258.93	1159.2	64.89	116.59	382.66	167	108.83	103.83	47.83	47.49	94.7	94.55
593.428	7.89	4.36	4.12	4.45	941.71	1007.31	42.52	104.5	3726.88	2065.38	180.43	141.96	2284.95	2352.35	116.4	147.84	17.18	30.69	13.49	11.51	13.12	231.93	4.99	100.35	1298.85	1174.7	66.84	118.23	379.36	164.1	108.69	103.61	46.19	46.85	94.4	94.35
593.767	7.83	4.94	4.16	4.44	971.87	1028.91	43.71	106.26	3706.5	2046.82	180.48	141.58	2329.61	2343.99	119.32	148.14	17	30.53	13.25	11.28	14.38	235.67	4.92	101.05	1341.85	1184.66	69	119.65	374.84	163.86	108.62	103.4	45.67	47.29	94.31	94.3
594.106	7.15	4.22	4.19	4.47	1005.35	1055.57	45	108.51	3705.26	2032.4	181.19	141.41	2382.65	2344.11	122.6	149.03	15.9	30.11	13.07	11.21	14.46	238.61	5.11	102.34	1384.65	1201.42	71.53	121.23	371.28	160.66	108.51	103.77	45.39	45.19	94.44	94.36
594.445	7.61	4.96	4.12	4.48	1022.21	1060.99	46.24	110.32	3630.98	1981.42	181.39	140.82	2390.25	2300.95	125.25	149.35	15.64	29.11	12.87	10.99	15.5	238.13	5.05	103.22	1402.19	1191.46	73.86	122.62	362.54	156.16	108.44	103.59	43.85	45.45	94.42	94.46
594.783	7.89	4.24	4.08	4.4	1069.51	1097.75	47.72	112.41	3664.58	1986.3	181.55	140.62	2465.35	2327.11	127.95	149.85	15.68	28.79	12.63	10.81	14.96	243.15	4.95	104.13	1464.21	1221.56	76.35	124.19	361.32	155.84	108.26	103.44	44.55	44.59	94.34	94.19
595.122	9.37	5.22	4.08	4.39	1082.93	1101.75	48.89	114.32	3585.66	1939.66	181.96	140.28	2470.43	2279.57	130.9	150.19	16.62	29.39	12.5	10.61	16.98	243.43	5.1	105.15	1480.33	1207.52	78.57	125.61	351.68	152.62	108.15	103.24	44.39	43.67	94.38	94.37
595.461	6.95	3.78	4.08	4.44	1127.47	1136.37	50.53	116.08	3607.76	1942.62	181.81	139.66	2541.43	2296.21	133.52	150.05	14.78	27.75	12.24	10.47	15.88	248.81	5.14	105.85	1542.19	1232.98	81.05	126.74	350.74	151.04	107.94	103.09	43.51	43.23	94.32	94.27
595.8	7.55	4.5	4.09	4.45	1154.33	1150.33	52.11	117.94	3561.94	1907.78	181.88	139.63	2559.55	2263.61	136.29	150.84	14.46	27.05	12.09	10.33	15.78	249.91	5.18	106.53	1572.23	1227.44	83.62	128.52	345.36	147.98	107.98	103.19	42.07	42.29	94.31	94.28
596.138	6.47	3.34	4.17	4.5	1206.61	1189.47	53.84	119.85	3575.36	1912.58	182.28	139.36	2630.69	2278.83	139.46	151.08	14.38	27.03	11.88	10.24	15.8	256.27	5.22	107.71	1630.93	1248.02	86.34	130.01	344.98	148.9	108.06	103.61	42.53	43.15	94.65	94.6
596.477	8.15	4.48	4.13	4.47	1231.61	1201.85	55.17	121.29	3533.84	1880.14	181.89	138.59	2651.95	2251.57	141.68	151.04	14.6	25.55	11.74	10.01	16.96	258.19	5.26	108.41	1664.91	1248.02	88.8	130.85	339.52	146.4	107.68	103.05	42.21	42.05	94.26	94.38
596.815	7.33	3.62	4.04	4.43	1285.43	1239.13	56.79	123.09	3547.88	1882.22	181.76	138.24	2722.61	2261.61	144.48	151.12	13.36	25.87	11.55	9.83	17.16	262.65	5.27	108.97	1722.13	1268.18	91.27	131.93	338.96	144.98	107.8	103.08	40.85	41.79	94.47	94.18
597.154	7.13	4.1	4.14	4.46	1333.83	1274.11	58.63	124.71	3548.72	1881.92	181.66	138.14	2774.31	2266.95	146.92	151.13	13.26	25.91	11.43	9.72	17.12	266.55	5.3	109.76	1779.31	1285.22	94.05	133.26	338.32	144.54	107.71	103.06	42.45	41.55	94.26	94.24
597.492	7.51	3.24	4.13	4.47	1359.51	1277.75	60.46	126.36	3487.88	1842.82	181.65	137.82	2783.27	2229.89	149.48	151.31	13.26	24.67	11.27	9.66	17.6	267.91	5.37	110.57	1802.71	1273.12	96.95	134.33	331.88	142.14	107.66	103.18	39.71	40.13	94.29	94.21
597.831	6.83	4.58	4.12	4.51	1397.67	1301.37	62.47	127.9	3466.12	1828.04	181.43	137.42	2816.59	2213.51	152.04	151.62	12.94	24.27	11.03	9.53	17.62	271.17	5.4	111.51	1843.33	1280.72	99.73	135.41	326.38	141.22	107.67	103.14	38.91	40.13	94.39	94.53
598.169	6.59	4.56	4.12	4.49	1423.53	1308.89	64.36	129.28	3403.06	1791.8	180.94	136.78	2820.03	2172.95	154.18	151.42	12.72	23.73	10.91	9.37	18.16	268.53	5.46	112.26	1864.61	1269.96	102.34	136.08	319.06	137.34	107.4	103.01	39.05	39.89	94.15	94.32
598.508	8.47	5.22	4.14	4.48	1488.03	1351.77	66.23	130.51	3425.24	1799.74	180.44	136.4	2886.97	2191.35	156.56	151.12	14.54	24.89	10.78	9.18	19.14	275.99	5.53	112.6	1935.17	1288.92	104.88	136.9	323.46	139.24	107.33	102.89	39.97	41.25	94.14	94.11
598.846	6.87	3.98	4.13	4.48	1497.41	1345.93	68.42	132.28	3335.94	1748.72	180.78	136.55	2856.51	2130.49	159.02	151.29	13.34	22.47	10.65	9.1	18.76	273.99	5.56	113.51	1937.91	1268	107.86	138.28	311.96	132.92	107.41	102.93	37.23	38.17	94.33	94.37
599.184	7.79	3.96	4.1	4.41	1551.95	1375.43	70.4	133.53	3324.3	1741.92	180.43	135.94	2901.93	2128.61	161	151.35	11.76	23.09	10.47	8.98	19.22	278.47	5.55	114.08	1997.01	1273.64	110.67	138.97	308.72	131.46	107.39	103.12	37.77	38.59	94.26	94.42
599.522	7.11	3.5	4.08	4.43	1589.75	1393.59	72.81	134.68	3295.82	1721.84	179.92	135.52	2924.19	2106.57	163.35	151.02	12.38	21.01	10.35	8.9	19.92	279.49	5.57	114.7	2027.11	1272.3	113.45	139.57	306.36	129.76	107.22	102.99	36.81	37.03	94.3	94.27
599.861	6.17	4.16	4.11	4.46	1639.29	1415.47	74.87	135.74	3281.5	1714.64	179.47	134.86	2953.13	2097.49	165.22	150.67	12.66	21.89	10.17	8.79	19.96	283.39	5.69	115.19	2078.21	1277.86	116.04	140.12	305.14	127.88	107	103.15	37.49	36.99	94.27	94.3
600.199	8.31	4.1	4.08	4.44	1679.37	1430.95	77.19	136.86	3249.78	1696.12	178.71	134.74	2969.09	2079.23	167.21	150.65	13.26	22.61	10.04	8.63	21.8	285.49	5.7	115.86	2112.07	1273.46	119.01	140.92	300.74	129.12	107.09	103	37.69	37.43	94.42	94.2
600.537	7.65	5.38	4.05	4.45	1718.49	1449.01	79.27	137.97	3216.66	1676.6	178.56	134.4	2982.47	2056.33	168.69	150.46	12.78	20.03	9.93	8.56	21.3	288.61	5.76	116.23	2142.97	1270.66	121.73	141.49	298.34	126.06	107	102.84	36.63	36.49	94.3	94.31
600.875	7.69	4.3	4.12	4.51	1761.11	1461.89	81.9	139.41	3173.7	1654.66	178.38	134.32	2983.45	2032.07	170.97	150.58	12.02	20.11	9.83	8.5	21.72	288.61	5.84	117.3	2173.51	1259.54	124.81	142.4	294.24	124.32	106.88	103.1	35.99	36.31	94.58	94.43
601.213	6.79	3.86	4.17	4.46	1795.99	1467.13	84.15	140.01	3133.84	1631.62	177.44	133.89	2988.95	1999.05	172.25	149.64	10.9	19.79	9.67	8.42	22.2	288.47	5.91	117.32	2202.09	1253.42	127.04	142.35	289.4	122.08	106.79	102.7	36.03	35.43	94.24	94.35
601.551	6.83	3.64	4.08	4.39	1847.13	1492.39	86.52	140.75	3114.3	1625.3	176.9	133.44	3012.33	1994.75	173.81	149.4	10.9	19.15	9.53	8.23	22.08	292.01	5.93	117.79	2244.57	1256.36	129.7	142.81	286.86	121.08	106.82	102.8	35.81	34.69	94.29	94.23
601.889	6.47	4.76	4.06	4.41	1910.45	1521.05	89	141.66	3117.28	1620.12	176.18	132.96	3050.63	1991.63	175.17	149.15	11.9	20.65	9.44	8.13	23.66	296.99	5.93	118.25	2298.03	1263.66	132.33	143.08	289.02	120.52	106.77	102.77	36.17	35.37	94.27	94.18
602.226	5.81	3.68	4.06	4.42	1916.33	1507.15	91.58	142.3	3029.1	1578.12	175.74	132.67	3001.39	1937.01	176.55	148.67	10.16	18.99	9.3	8.1	23.5	291.71	5.99	118.58	2289.29	1234.08	134.89	143.34	278.24	117.64	106.84	102.71	34.21	33.45	94.16	94.32
602.564	7.09	4.1	3.97	4.38	1977.55	1534.59	94.08	143.04	3024.74	1580.54	175.03	132.43	3037.55	1936.41	177.89	148.58	10.7	19.17	9.3	8.02	24.36	296.97	6.08	119.09	2337.99	1243.1	137.28	143.78	277.72	117.04	106.48	102.84	34.95	34.23	94.39	94.37
602.902	7.77	5	4.1	4.43	2028.07	1551.59	96.56	144	3007.54	1566.74	174.58	132.03	3046.23	1923.73	179.09	148.25	11.16	19.83	9.14	7.91	25.62	300.83	6.18	119.67	2378.23	1241.52	139.94	144.03	277.26	118.62	106.77	102.96	34.37	34.41	94.23	94.35
603.24	7.27	5.08	4.08	4.44	2073.35	1565.33	98.97	144.07	2980.76	1555.5	173.64	131.5	3051.71	1907.27	179.75	147.55	11.68	19.05	9.05	7.82	25.46	302.53	6.27	119.6	2407.87	1232.74	141.84	143.93	273.04	115.12	106.53	102.49	33.95	34.71	94.09	94.12
603.577	6.71	4.16	4.19	4.43	2112.97	1575.23	101.86	144.68	2941.3	1536.98	173.15	131.19	3047.21	1885.81	180.98	147.28	11.24	18.77	9	7.78	27.28	302.37	6.32	120.03	2430.65	1225.04	144.36	144.27	270.82	113.8	106.44	102.8	34.11	33.77	94.17	94.38
603.915	7.05	5.18	4.1	4.42	2158.13	1584.73	104.37	145.21	2920.12	1522.26	172.46	130.97	3048.93	1869.65	181.62	146.86	10.52	18.43	8.87	7.7	26.5	304.65	6.33	120.31	2453.81	1218.08	146.48	144.31	267.46	111.9	106.27	102.62	32.67	33.39	94.18	94.41
604.253	6.97	5.2	3.99	4.38	2219.17	1604.89	106.81	145.79	2909.86	1518.54	171.96	130.6	3064.81	1863.01	182.76	146.47	11.16	18.95	8.77	7.59	28.54	307.29	6.39	120.86	2493.55	1224.7	148.66	144.42	266.04	112.5	106.39	102.61	33.47	33.75	94.25	94.24
604.59	5.71	3.92	4.04	4.4	2229.29	1587.75	109.59	146.12	2837.5	1486.44	171.02	130.53	3017.77	1813.19	183.39	146.17	9.4	18.23	8.67	7.49	28.46	304.61	6.55	121.23	2475.89	1196.7	150.81	144.33	260.46	108.54	106.37	102.96	32.53	32.65	94.23	94.32
604.928	6.23	3.44	4.06	4.4	2288.27	1611.21	112.02	146.12	2838.92	1485.2	169.99	129.74	3039.25	1818.17	183.56	145.28	9.74	17.09	8.52	7.36	29.72	309.09	6.57	121.03	2524.31	1202.38	152.35	144.05	259.28	109.66	105.94	102.54	32.19	32.63	94.1	93.99
605.265	6.99	4.26	3.99	4.38	2282.21	1580.91	114.95	146.58	2748.98	1439.96	169.9	129.53	2967.95	1761.07	184.53	145.23	10.54	16.23	8.43	7.35	29.66	304.99	6.55	121.58	2488.21	1169.2	154.86	144.51	251.64	105.92	106.01	102.62	30.55	31.81	94.25	94.46
605.602	7.07	3.96	4.09	4.4	2362.55	1616.03	117.61	146.73	2769.38	1452.42	169.11	129.35	3015.87	1772.81	184.58	144.75	10.42	17.21	8.38	7.3	31.2	311.05	6.72	121.74	2551.71	1180.22	156.38	144.26	253.32	107.02	106.06	102.61	32.19	33.01	94.44	94.22
605.94	7.11	3.6	4.05	4.42	2364.31	1594.99	120	146.56	2704.46	1419.64	168.14	128.83	2961.01	1730.91	184.68	144.02	9.46	15.81	8.33	7.27	30.84	306.63	6.75	121.73	2528.85	1154.38	157.94	143.8	247.04	104.3	105.95	102.5	30.97	30.49	94.13	94.03
606.277	7.07	4.16	4.02	4.42	2435.83	1626.03	122.62	146.96	2718.78	1426.98	167.26	128.65	3000.65	1743.19	184.96	143.38	9.6	16.03	8.2	7.14	33.2	311.65	6.89	122.08	2578.89	1165.56	159.84	143.84	250.5	105.42	105.78	102.57	30.69	31.21	94	94.09
606.614	7.77	4.78	4.01	4.37	2459.91	1620.77	125.03	146.9	2680.8	1407.52	166.54	128.03	2967.29	1711.49	185.21	143.14	10.86	17.31	8.12	7.08	34.16	311.21	6.94	122.07	2576.47	1147.7	161.26	143.72	246	105.26	105.9	102.48	31.27	30.55	94.12	94.14
606.952	5.89	4.4	4.12	4.45	2498.65	1625.57	127.69	147.15	2653.76	1392.88	165.96	127.87	2953.25	1695.11	185.25	142.5	8.74	16.15	8.14	7.15	33.86	311.17	7.1	122.39	2588.35	1142.46	162.73	143.51	243.78	101.38	105.77	102.48	30.11	29.89	94.22	94.21
607.289	7.85	4.9	4.04	4.36	2538.01	1629.59	129.77	146.78	2624.36	1383.18	164.83	127.43	2937.51	1682.11	185.03	141.84	10.88	17.41	7.97	6.98	36.16	313.67	7.17	122.42	2603.11	1133.3	163.79	143.01	242.94	103.14	105.54	102.35	30.81	30.21	94.07	93.93
607.626	6.69	4.74	4.07	4.38	2563.53	1626.15	131.95	146.92	2593.82	1364.02	163.99	126.98	2921.43	1657.25	185.1	141.12	9.1	15.65	7.99	7.04	35.92	312.85	7.35	122.31	2599.99	1121.44	165.14	142.91	238.84	100.02	105.51	102.3	29.63	28.97	93.96	93.97
607.963	6.39	4.38	4.06	4.45	2577.57	1617.43	134.97	147.21	2554.38	1346.86	164.02	127.21	2881.19	1630.87	185.45	140.88	8.58	16.47	7.91	6.93	37.3	312.09	7.49	122.72	2595.31	1104.58	166.99	142.91	235.66	98.06	105.68	102.62	29.51	29.77	94.04	94.25
608.3	7.45	4.14	4.07	4.47	2596.47	1607.65	136.94	146.79	2520.28	1327.24	163.01	126.63	2856.95	1610.21	184.82	140.66	10.36	14.85	7.83	6.97	37.56	309.27	7.61	122.81	2586.85	1092.38	167.78	142.43	232.92	96.64	105.58	102.55	28.91	29.41	94.04	94.29
608.637	7.11	3.98	4.02	4.38	2610.95	1598.51	138.98	146.8	2478.44	1307.16	162.23	126.3	2811.63	1580.65	184.67	139.98	9.88	14.65	7.73	6.87	39.22	309.75	7.67	122.74	2573.71	1074.5	168.86	142.06	228.8	95.18	105.23	102.28	28.53	28.67	94.15	94.03
608.974	6.57	4.28	4.07	4.39	2642.93	1600.89	141.36	146.91	2459.62	1301.94	161.61	126.22	2809.01	1572.09	184.52	139.55	8.56	15.11	7.75	6.85	39.46	311.57	7.86	123.07	2583.11	1075.74	169.83	142.08	226.92	95.04	105.31	102.36	29.15	27.71	94.19	94.28
609.311	6.73	5.32	4.08	4.4	2677.05	1603.61	143.42	146.33	2452.34	1293.24	161.04	125.79	2805.87	1562.27	184.24	138.83	8.44	14.71	7.66	6.82	40.8	312.49	7.99	122.95	2596.75	1065.72	170.44	141.73	225.8	93.72	105.38	102.47	28.29	27.75	94.06	94.2
609.648	6.77	4.9	4.06	4.44	2700.17	1603.43	145.63	146.43	2423.84	1283.88	160.17	125.56	2777.33	1542.93	183.9	138.76	9.1	14.71	7.64	6.73	42.5	312.01	8.19	123.26	2590.39	1054.96	171.41	141.46	224.44	93.96	105.55	102.36	28.55	27.75	94.45	94.05
609.985	6.07	4.14	4	4.45	2715.77	1595.17	147.36	146	2393.46	1268.42	159.31	125.2	2755.93	1526.69	183.35	138.04	8.56	14.25	7.49	6.68	43.54	310.91	8.32	123.13	2578.57	1045.06	171.87	141.1	221.78	93.12	105.2	102.41	28.79	27.65	94.08	94.21
610.321	5.97	3.18	4.01	4.37	2723.95	1585.25	149.33	145.95	2358.9	1251.96	158.92	124.91	2722.53	1507.29	183.06	137.8	8.1	13.41	7.49	6.62	44.04	310.67	8.46	123.29	2564.15	1029.16	172.5	140.86	217.5	90.54	105.41	102.41	27.39	27.35	94.22	94.17
610.658	6.13	3.04	4.03	4.38	2747.91	1585.19	151.27	145.71	2343.66	1244.4	158.22	124.59	2700.03	1497.13	182.72	137.37	8.44	13.19	7.45	6.64	45.26	311.37	8.77	123.41	2563.65	1022.32	173.28	140.55	217.42	90.5	105.55	102.44	27.33	27.35	94.3	94.36
610.995	5.91	3.44	4.04	4.39	2755.39	1576.11	152.77	145.37	2312.38	1226.26	157.4	124.23	2673.85	1473.81	182.06	136.76	8.34	13.49	7.39	6.53	45.96	310.53	8.85	123.18	2553.43	1011.02	173.56	140.22	214	89.72	105.27	102.27	26.59	26.85	94.17	94.26
611.331	7.13	4.74	4.06	4.39	2767.17	1565.29	154.3	145.26	2288.4	1213.5	156.77	123.94	2648.95	1461.75	181.47	136.48	7.74	13.21	7.32	6.51	48.3	308.91	9.05	123.26	2540.73	1003.4	174.03	139.61	213.54	88.36	105.21	102.52	26.83	26.81	94.22	94.31
611.668	6.37	3.9	4.1	4.45	2803.51	1573.33	155.83	144.8	2285.06	1214.18	156	123.67	2649.45	1458.65	180.82	135.92	8.24	13.31	7.36	6.5	49.78	311.85	9.39	123.23	2558.23	1000.46	174.19	139.5	211.98	88.14	105.35	102.43	27.15	26.47	94.37	94.22
612.005	6.27	4.72	4.06	4.42	2788.93	1551.93	157.63	144.54	2243.6	1191.74	155.59	123.44	2600.37	1432.11	180.43	135.46	8.92	13.33	7.3	6.46	51.24	308.61	9.59	123.23	2524.57	983.94	174.49	139.13	207.44	86.4	105.13	102.55	26.79	25.83	94.24	94.34
612.341	6.37	4.3	4.06	4.35	2816.13	1555.69	158.62	144.08	2237.2	1192.28	154.47	123.06	2597.73	1428.19	179.31	134.81	8.04	12.99	7.22	6.42	52.74	310.49	9.82	122.84	2528.55	981.9	174.45	138.49	208.6	87.22	104.93	102.23	25.95	26.15	94.07	94.07
612.678	6.89	5.2	3.99	4.39	2824.17	1551.29	159.39	143.36	2213.02	1178.3	153.5	122.43	2571.61	1415.67	178.19	134.06	9.48	14.17	7.17	6.36	55.38	311.07	10.1	122.65	2513.37	973.14	173.96	137.75	207.36	87.52	104.6	101.99	26.89	27.25	93.93	94.04
613.014	5.57	3.94	4.04	4.42	2835.57	1543.87	160.82	143.21	2198.04	1166.96	153.31	122.39	2550.77	1404.85	177.65	133.71	8.38	12.39	7.17	6.33	56.66	310.67	10.37	122.81	2505.07	962.8	174.21	137.61	204.44	85.46	104.82	102.07	25.91	25.67	94.23	94.09
613.35	6.05	3.44	4.08	4.38	2833.89	1530.13	162.08	143.05	2169.38	1152.86	152.73	122.16	2522.41	1384.27	177.25	133.46	7.72	12.73	7.2	6.36	56.86	308.37	10.72	122.71	2486.73	950.98	174.45	137.39	201.2	84.36	104.88	102.2	24.83	26.25	94.07	94.16
613.687	6.49	3.96	4.11	4.43	2824.33	1519.39	163.01	142.63	2140.42	1140.88	152.13	122.08	2488.41	1365.69	176.32	133.09	8.4	13.29	7.08	6.32	58.5	306.37	11	122.78	2467.01	941	174.19	137.09	199.72	83	104.8	102.27	25.63	24.27	94.14	94.17
614.023	9.01	7.14	4.07	4.38	2843.71	1520.61	164.28	142.18	2132.76	1137.02	151.32	121.59	2484.13	1363.67	175.56	132.56	9.88	15.27	7.12	6.31	62.8	311.29	11.33	122.53	2469.53	939.1	174.08	136.53	199.96	84.64	104.86	102.1	27.81	27.23	94.21	94.14
614.359	5.93	3.92	4.1	4.46	2854.41	1512.13	165.04	141.9	2121.04	1128.06	150.64	121.21	2468.31	1353.81	174.88	132.14	8.74	11.55	7.07	6.26	63.02	308.53	11.64	122.7	2457.75	932.26	174.09	136.26	198.6	82.28	104.75	102.3	25.23	23.69	94.11	94.11
614.695	5.59	3.08	4.03	4.36	2856.39	1507.65	165.55	141.06	2105.54	1119	149.81	120.93	2443.47	1345.19	173.8	131.53	7.06	12.15	6.93	6.2	64.36	306.91	12.03	122.28	2443.79	924.88	173.62	135.59	196.86	82.1	104.53	102.1	24.89	25.05	94.01	94.01
615.031	5.75	3.52	4.04	4.4	2838.51	1484.11	166.3	140.97	2071.14	1101.72	149.5	120.63	2402.93	1323.69	173.16	131.18	7.8	12.13	6.94	6.2	66.7	304.31	12.43	122.31	2413.53	912.14	173.54	135.38	194.84	81	104.55	102.26	24.11	24.55	94.25	94.2
615.368	6.75	4.62	4.05	4.39	2850.79	1489.75	166.86	140.57	2064.26	1095.72	148.83	120.18	2397.15	1322.25	172.37	130.97	8.06	12.09	6.91	6.16	69.58	305.81	12.86	122.38	2409.93	910.86	173.24	134.79	193.66	80.02	104.63	102.11	25.07	23.91	94.22	94.13
615.704	5.59	3.64	4.04	4.41	2840.39	1475.45	167.57	140.22	2036.24	1083.28	148.25	120.13	2368.71	1303.69	171.69	130.53	7.06	11.37	6.94	6.17	70.24	304.83	13.23	122.21	2391.43	897.02	173	134.48	190.82	78.22	104.59	102.07	23.37	23.37	94.04	93.96
616.04	5.95	4.5	4.04	4.4	2838.55	1467.39	168.12	139.84	2025.14	1074.74	147.59	119.93	2349.57	1299.25	171.04	130.2	7.6	11.73	6.91	6.12	72.3	304.07	13.69	121.8	2376.19	890.66	172.72	134.21	189.36	78.58	104.48	102.13	23.75	23.97	94.11	94.11
616.376	5.79	3.92	4.04	4.39	2827.75	1457.73	168.42	139.43	2008.56	1066.46	147.04	119.58	2322.87	1281.89	170.15	129.54	7.62	12.33	6.84	6.12	74.08	302.03	14.15	121.92	2357.39	883.88	172.13	133.88	185.82	77.58	104.35	101.96	23.49	23.63	94.09	94.11
616.711	6.07	3.92	4.02	4.38	2832.59	1454.97	169.15	139.33	1997.14	1061.26	146.65	119.37	2312.39	1281.61	169.55	129.51	7.06	11.51	6.76	6.12	76.22	302.77	14.66	122.05	2350.91	877.78	172.06	133.51	186.98	77.78	104.4	101.91	23.61	23.47	94.22	93.97
617.047	5.97	4.62	4.02	4.33	2825.31	1445.05	169.54	139.1	1976.82	1050.78	146.23	119.3	2287.73	1268.03	168.87	129.17	7.66	12.03	6.77	6.13	78.94	301.73	15.15	121.88	2334.73	870.84	171.76	133.44	184.62	76.12	104.56	102.18	23.71	22.89	94.4	94.32
617.383	5.19	3.88	3.96	4.38	2822.77	1437.91	169.45	138.41	1967.26	1040.86	145.39	118.73	2273.21	1261.15	167.95	128.43	8.14	11.37	6.72	6.08	80.8	301.99	15.68	121.56	2321.01	862.3	170.9	132.7	184.5	77.02	104.3	102.18	23.27	23.47	94.18	93.93
617.719	5.47	3.46	4.06	4.38	2817.45	1428.85	169.25	137.63	1952.82	1034.58	144.71	118.34	2254.29	1254.17	166.87	127.98	7.26	11.79	6.69	6.04	81.26	302.75	16.27	121.13	2305.57	860.94	170.29	132.35	183.4	76.2	104	101.85	22.95	22.87	93.98	93.94
618.055	6.33	4.7	4.04	4.45	2788.91	1408.61	170.08	137.78	1924.34	1014.38	144.66	118.45	2221.81	1232.67	166.74	127.82	7.9	12.01	6.71	6.04	86.1	298.43	16.88	121.62	2273.77	849.28	170.28	132.33	179.66	75.48	104.5	102.08	23.75	23.07	94.19	94.37
618.39	4.99	4.28	4.08	4.37	2783.35	1404.45	170.04	137.08	1908.48	1006.96	143.75	117.82	2201.67	1225.55	165.9	127.61	6.96	10.89	6.71	6.06	87.66	297.49	17.44	121.14	2259.79	841.9	169.44	131.71	179.76	74.44	104.15	101.97	22.17	21.01	94.28	94.09
618.726	6.19	3.68	4.04	4.4	2783.11	1401.37	170.27	136.92	1899.96	1003.42	143.49	117.92	2192.59	1218.97	165.34	127.43	7.96	11.41	6.7	6.04	89.66	298.59	18.17	121.28	2249.17	839.1	169.27	131.63	178.06	73.9	104.33	102.13	22.67	22.05	94.31	94.17
619.062	5.45	4.14	4.01	4.37	2758.69	1387.27	170.02	136.31	1878.14	991.42	142.79	117.33	2163.91	1208.63	164.11	126.9	7.96	11.31	6.69	5.97	91.82	295.33	18.78	121.07	2225.99	829.32	168.48	131.18	175.9	73.86	104.03	101.97	22.29	22.19	94.07	93.98
619.397	7.23	4.06	4.09	4.42	2748.81	1379.81	170.26	136.4	1867.04	982.32	142.59	117.44	2148.91	1203.85	163.63	126.59	7.46	11.49	6.71	6.02	95.16	296.69	19.5	121.11	2211.75	825.42	168.34	131.05	175.84	72.86	104.25	102.13	22.31	23.03	94.23	94.39
619.733	5.95	3.84	4	4.44	2745.53	1372.05	170.18	135.92	1854.74	974.42	141.96	117.07	2137.47	1194.41	162.84	126.33	7.24	10.93	6.58	5.96	96.82	295.53	20.13	120.83	2200.97	819.86	167.85	130.65	172.56	72.08	104.16	101.88	21.43	21.27	94.18	94.22
620.068	5.67	3.88	4.04	4.41	2714.45	1354.15	169.86	135.16	1829.22	960.5	141.32	116.79	2105.31	1176.87	162.08	125.74	6.68	11.69	6.54	5.96	99.5	291.85	20.75	120.47	2171.19	804.9	167	130.14	172.18	72.3	104.03	101.81	21.75	21.67	93.9	94.1
620.404	5.69	4.58	4.03	4.39	2713.17	1352.61	170.05	135.12	1823	953.6	140.88	116.56	2095.69	1175.25	161.52	125.67	7.16	11.19	6.58	5.97	102.64	291.37	21.63	120.45	2159.93	805.2	166.55	129.83	169.98	70.7	104.02	101.77	21.91	20.53	94.09	94
620.739	6.15	3.88	4.03	4.37	2707.05	1345.79	169.75	134.73	1813.62	947.68	140.38	116.16	2079.53	1168.43	160.82	125.21	6.62	10.85	6.52	5.94	104.64	290.37	22.37	120.42	2148.95	801.62	165.87	129.48	167.96	70.78	103.68	101.81	20.79	21.61	94.09	93.96
621.074	4.93	4.36	3.99	4.31	2667.47	1322.91	169.66	134.43	1782.44	929.88	139.99	116.06	2047.77	1150.89	160.24	125.04	6.16	10.51	6.51	5.87	106.86	287.61	23.16	120.22	2116.29	788.36	165.58	129.25	165.96	69.9	103.91	101.87	20.83	21.79	94.07	93.84
621.41	5.73	4.66	4.03	4.34	2667.19	1326.13	169.52	134.15	1777.2	926.74	139.73	115.98	2039.47	1146.69	159.78	124.98	7.08	11.09	6.49	5.86	110.08	286.11	24.03	120.35	2109.63	785.92	165.14	129.02	165.36	69.88	103.87	102.15	21.53	20.35	94.16	94.03
621.745	6.31	4.74	4.04	4.35	2663.97	1317.29	169.23	133.68	1767.08	919.5	139.18	115.69	2030.71	1141.15	159.1	124.5	7.18	11.69	6.47	5.95	114.04	286.91	24.82	119.94	2100.19	783.9	164.49	128.84	165.66	69.78	103.88	101.85	21.75	20.37	94.13	94.09
622.08	7.01	4.1	4.01	4.35	2643.87	1311.79	169.36	133.55	1753.6	905.36	138.98	115.47	2013.35	1131.25	158.54	124.25	7.2	10.83	6.45	5.89	114.86	285.45	25.65	119.92	2082.09	778.68	163.97	128.51	162.86	66.76	103.81	101.8	21.47	20.45	94.05	94.12
622.415	5.37	4.34	4.05	4.4	2615.79	1292.39	169.24	133.33	1728.06	894.1	138.58	115.18	1985.93	1119.41	157.99	124.18	5.92	10.77	6.48	5.91	117.66	280.95	26.48	119.81	2058.21	768	163.66	128.16	160.38	66.56	103.88	101.94	19.75	19.73	94.16	94.21
622.75	5.73	3.9	4.03	4.38	2610.85	1287.93	168.9	133.04	1719.62	885.48	137.94	115.04	1974.19	1114.13	157.5	123.84	6.98	10.49	6.46	5.86	120.64	279.79	27.36	119.65	2044.87	765.14	163.08	127.97	159.3	65.48	103.88	101.98	20.09	20.61	94.17	94.06
623.085	7.67	6.24	3.99	4.34	2577.55	1270.99	168.77	132.97	1694.54	873.02	137.91	114.97	1949.93	1099.93	157.03	123.68	8.96	12.09	6.45	5.91	125.04	279.67	28.3	119.77	2015.39	755.5	163.05	128.06	159.98	67.36	104.03	101.99	22.71	22.39	94.31	94.4
623.42	6.23	4.42	4	4.36	2565.89	1266.69	168.5	132.45	1678.88	862.5	137.43	114.81	1931.29	1091.53	156.39	123.57	7.08	10.69	6.43	5.85	125.88	276.43	29.26	119.54	1998.57	749.38	162.5	127.62	156.16	65.76	103.73	101.88	20.99	20.05	94.31	94.1
623.755	6.07	3.18	4.07	4.38	2555.77	1262.85	167.97	131.85	1675.5	855.7	136.93	114.4	1924.55	1088.43	155.85	123.11	6.94	9.67	6.45	5.83	128.2	278.01	30.25	119.3	1990.63	744.88	161.52	127.49	154.58	65.16	103.66	101.79	19.81	19.71	94.11	94.03
624.09	5.19	4.1	4.05	4.38	2546.33	1252.25	167.77	131.88	1658.56	844.48	136.47	114.25	1910.83	1081.77	155.45	122.87	6.88	10.73	6.34	5.81	131.28	275.95	31.23	119.13	1977.61	743.3	161.29	127.02	154.72	64.88	103.68	101.81	19.59	19.89	94.15	94.19
624.425	5.63	3.94	4.07	4.37	2495.57	1230.33	167.51	131.74	1627.56	827.44	136.08	113.92	1875.63	1057.41	154.77	122.69	6.52	8.83	6.38	5.81	131.9	270.57	32.21	119.05	1942.41	726.02	160.74	126.74	150.66	63.92	103.76	101.78	17.95	18.33	94.05	94.01
624.76	6.69	3.36	4.01	4.36	2469.43	1217.49	167.28	130.99	1603.5	813.98	135.49	113.66	1855.85	1045.59	153.98	122.25	5.86	9.39	6.36	5.83	135.38	267.15	33.14	118.88	1918.27	721.26	160.25	126.35	148.68	63.4	103.47	101.69	18.51	17.73	94.1	93.88
625.095	5.75	3.58	3.98	4.36	2472.07	1218.31	167	131.15	1604.92	810.4	135.54	113.45	1855.25	1049.17	153.79	122.24	6.14	9.37	6.34	5.76	138.3	269.53	34.13	118.69	1917.07	719.44	159.93	126.36	147.46	62.68	103.51	101.73	19.29	19.67	94.1	94.1
625.429	5.17	3.94	3.94	4.3	2437.07	1198.37	166.71	130.73	1575.76	796.92	135.1	113.19	1825.29	1028.05	153.01	121.98	6.02	8.69	6.25	5.74	139.04	263.43	35.03	118.59	1888.41	706.68	159.38	126.03	145.02	61.32	103.6	101.69	18.13	18.65	93.88	94.01
625.764	5.65	4.36	4.03	4.36	2422.25	1193.27	166.74	130.82	1561.7	785.08	134.8	113.21	1812.15	1019.55	153.17	122.01	7.18	9.43	6.4	5.83	141.12	262.21	36.22	118.76	1872.81	704.82	159.21	126.32	143.26	61.4	103.76	101.98	18.61	18.79	94.15	94.29
626.099	8.03	7.6	3.99	4.35	2412.45	1192.69	166.37	130.58	1552.24	780.32	134.45	113.18	1805.23	1018.91	152.68	121.64	9	12.11	6.26	5.77	146.8	264.91	37.33	118.57	1865.75	703.96	158.61	126.02	144.04	62.54	103.54	101.8	21.07	21.05	94.1	94.06
626.433	5.59	5.02	3.97	4.3	2384.89	1172.01	166.17	130.21	1528.64	764.44	134.23	112.96	1778.87	1003.63	152.06	121.44	6.3	10.03	6.23	5.77	145.68	258.55	38.29	118.54	1841.27	690.74	158.32	125.72	139.42	59.06	103.42	101.83	18.29	18.73	94.17	94.17
626.768	5.93	3.82	4.02	4.34	2384.31	1171.61	165.68	130.07	1528.52	762.38	133.64	112.53	1776.49	1005.59	151.52	121.07	7.24	9.17	6.29	5.73	149.7	257.37	39.37	118.14	1839.21	691.98	157.68	125.32	140.26	58.98	103.41	101.74	18.37	19.11	94.01	94.21
627.102	5.01	4.26	4.03	4.35	2366.15	1162.91	165.67	129.8	1510.42	751.86	133.46	112.43	1761.43	993.43	151.35	121.08	5.34	9.71	6.29	5.74	151.56	256.85	40.36	118.15	1824.67	685.96	157.49	125.23	138.6	57.36	103.44	101.87	17.79	17.67	94.25	94.13
627.437	6.41	3.84	4.01	4.33	2321.29	1143.23	165.3	129.67	1480.28	732.78	133.22	112.27	1732.57	975.13	150.82	120.87	6.74	9.23	6.28	5.71	152.12	252.95	41.5	117.88	1790.21	674.6	157.11	125.19	135.24	57.36	103.29	101.72	18.09	18.25	94.08	94.07
627.771	5.11	4.1	4.04	4.37	2303.71	1133.23	165.28	129.53	1463.34	723.62	132.91	112.25	1717.49	964.47	150.48	120.74	6.66	9.11	6.26	5.81	155	250.51	42.46	117.93	1773.75	669.48	156.75	125.11	133.1	55.74	103.55	101.86	17.81	16.61	94.15	94.1
628.106	5.85	4.22	4.04	4.29	2285.37	1121.91	164.44	129.13	1454.06	714.16	132.28	111.74	1704.77	957.85	149.92	120.32	6.3	8.91	6.24	5.72	155.68	248.25	43.51	117.54	1763.79	663.3	156.1	124.57	132.26	55.54	103.17	101.68	17.37	17.37	94.01	93.92
628.44	5.75	4.66	4.03	4.4	2270.97	1115.65	164.31	129.24	1434.6	703	132.3	111.79	1689.19	948.37	149.97	120.23	5.72	9.51	6.28	5.69	158.84	246.35	44.65	117.77	1745.33	655.94	156.05	124.72	131.5	55.82	103.35	101.78	16.61	17.83	94.14	94.12
628.774	6.47	4.5	4.07	4.42	2252.53	1109.89	164.14	128.74	1424.48	695.28	131.97	111.6	1679.15	938.07	149.34	120.23	6.7	9.93	6.25	5.75	161.16	244.91	45.72	117.46	1735.33	652.22	155.69	124.43	129.76	54.6	103.38	101.72	17.39	17.97	94.08	93.92
629.108	5.41	3.24	4.01	4.4	2232.69	1094.45	163.59	128.47	1402.56	682.22	131.55	111.22	1661.99	929.59	148.9	119.78	5.74	9.47	6.24	5.75	161.52	241.61	46.76	117.2	1718.49	646.16	155.2	124.1	127.22	54.14	103.23	101.65	16.73	16.91	93.89	93.89
629.443	4.35	3.76	3.99	4.37	2208.89	1084.09	163.82	128.63	1380.34	669.96	131.61	111.27	1640.35	915.13	149.15	119.78	5.86	8.15	6.21	5.69	162.12	238.13	47.75	117.23	1692.91	639.06	155.1	124.33	125.9	53.5	103.28	101.8	15.95	15.83	94.19	94
629.777	4.81	3.28	4.02	4.38	2181.61	1071.55	163.36	128.31	1361.36	657.88	130.95	111.02	1622.47	905.57	148.41	119.6	6.2	8.25	6.2	5.71	163.56	234.99	48.96	117.17	1675.67	631.06	154.67	123.73	124.18	52.82	103.19	101.71	16.61	16.35	93.94	94.16
630.111	5.47	4.1	4.03	4.46	2174.45	1066.71	163.25	128.11	1352.34	653.5	130.84	110.9	1615.71	900.21	148.4	119.54	5.8	8.87	6.21	5.68	166.28	234.53	50.01	117	1670.61	627.8	154.33	123.89	123.08	52	103.42	101.65	16.67	16.45	94.07	94.09
630.445	5.67	4.34	4.05	4.36	2148.95	1054.19	162.82	128.01	1331.08	641.74	130.45	110.8	1594.51	889.45	147.92	119.42	6.88	9.47	6.19	5.69	166.82	232.17	50.94	117.14	1645.05	619.9	154.1	123.78	121.54	51.68	103.21	101.59	15.99	16.37	93.93	94.02
630.779	5.39	4.06	4.09	4.36	2132.87	1046.85	162.89	128.03	1316.08	631.22	130.42	110.73	1583.39	879.01	147.71	119.35	6.26	8.65	6.22	5.78	166.92	229.09	52.04	117.13	1630.41	614.86	153.92	123.76	118.78	49.76	103.48	101.92	16.35	15.19	94.24	94.34
631.113	4.95	4.02	4	4.3	2104.97	1031.93	162.25	127.65	1292.12	615.6	129.81	110.34	1561.47	866.03	147.34	118.87	5.82	9.81	6.14	5.62	168.6	226.61	52.93	116.46	1611.19	606.1	153.45	123.24	115.34	49.44	103.11	101.5	15.01	15.99	93.88	94.03
631.447	6.11	3.5	4.02	4.39	2102.57	1033.63	162.09	127.44	1291.24	612.88	129.62	110.38	1561.09	865.57	147.08	118.71	7.14	9.29	6.16	5.63	171.52	225.97	54.01	116.61	1612.63	606.8	153.23	123.23	116.66	48.76	103.17	101.77	16.73	16.13	94.19	93.97
631.781	5.85	3	4.05	4.38	2069.51	1016.65	161.75	127.35	1263.5	597.62	129.3	109.99	1536.91	849.29	146.64	118.61	6.2	8.63	6.16	5.7	169.16	221.91	54.96	116.41	1584.15	595.66	152.65	123.06	114.68	47.74	103.12	101.55	15.41	14.99	94.04	94.09
632.114	5.71	3.8	4.02	4.35	2072.05	1015.23	161.68	127.12	1256.44	595.48	129.12	109.91	1534.05	845.35	146.27	118.52	6.06	8.33	6.15	5.6	173.66	221.61	55.97	116.4	1580.05	596.32	152.41	122.9	113.36	48.54	103.06	101.82	15.77	15.63	93.97	93.93
632.448	5.73	3.68	3.98	4.29	2044.63	1004.13	161.6	127.24	1242.52	585.52	128.73	109.84	1517.69	833.41	146.26	118.43	6.94	7.85	6.11	5.67	172.38	218.97	56.88	116.59	1565.13	588.86	152.31	122.9	111.48	48.42	103.12	101.82	14.85	15.13	94.05	94.17
632.782	6.29	4.3	3.98	4.29	2009.77	984.67	161.5	127.23	1212.72	568.7	128.69	109.81	1490.21	815.31	146.25	118.38	6.2	8.19	6.07	5.63	171.8	214.27	58.12	116.41	1534.63	576.92	152.18	122.84	108.92	46.9	102.98	101.77	14.11	14.51	94.17	93.99
633.116	7.85	6.44	4.05	4.38	2014.35	985.17	161.28	127.05	1210.02	568.68	128.47	109.59	1487.01	818.19	145.9	118.19	7.2	10.09	6.12	5.65	177.1	217.23	58.99	116.13	1536.13	578.26	151.89	122.78	111	48.14	103.05	101.87	16.83	17.09	94.33	94.19
633.449	5.69	3.82	4	4.34	1991.89	973.53	160.65	126.72	1192.2	554.48	127.98	109.19	1475.21	806.37	145.44	117.65	5.08	7.77	6	5.56	175.4	211.83	59.81	115.97	1522.69	571.84	151.58	122.48	106.44	45.06	103.06	101.5	14.73	15.01	93.99	94.09
633.783	5.45	4.1	4.01	4.36	1979.29	964.61	160.82	126.79	1175.52	548.12	128.09	109.48	1461.97	797.45	145.39	117.72	5.14	7.83	6.05	5.61	174.64	211.45	61.01	116.16	1508.71	564.72	151.36	122.69	105.22	44.7	103.09	101.77	15.05	14.65	94.2	94.29
634.116	4.85	3.66	4.07	4.42	1947.45	951.47	160.23	126.4	1155.08	536.64	127.51	108.9	1442.13	780.83	144.88	117.37	5	7.31	6.06	5.65	174.84	207.23	61.68	115.65	1482.31	557.68	150.96	122.04	103.56	43.94	102.82	101.48	14.39	14.83	94.06	93.96
634.45	4.67	3.22	4.04	4.41	1931.95	942.15	159.78	126.18	1137.48	529.04	127.37	108.8	1428.77	771.61	144.66	117.49	5.16	8.29	6.09	5.65	175.7	204.57	62.54	115.77	1468.27	551.98	150.87	122.12	101.78	43.32	102.92	101.7	14.05	13.77	94.15	94.06
634.783	4.57	3.9	4.01	4.36	1907.63	932.25	159.85	126.16	1117.92	517.46	127.14	108.93	1409.89	760.49	144.46	117.26	5.82	7.39	6.05	5.68	175.56	201.31	63.47	115.67	1451.23	543.12	150.53	122.04	99.54	43.04	102.93	101.73	13.67	12.91	93.98	93.93
635.117	5.93	4.78	4.05	4.36	1906.11	932.59	159.37	125.97	1115.34	510.82	126.83	108.5	1407.75	761.87	144.11	117.03	5.62	8.71	6.07	5.65	176.82	201.29	64.36	115.32	1451.83	543.52	150.11	121.82	99.04	43.8	102.8	101.51	13.47	14.03	93.66	93.97
635.45	5.81	4.42	4.01	4.35	1878.27	917.15	159.44	125.95	1093.58	500.66	126.68	108.69	1388.27	745.85	144.03	117.11	5.38	7.79	6.03	5.57	175.14	198.53	65.2	115.57	1428.83	533.26	150.2	121.77	97.18	41.48	102.99	101.5	13.95	14.57	93.88	94.11
635.783	5.29	3.62	4.02	4.37	1868.09	911.35	158.99	125.85	1080.9	493.48	126.34	108.3	1374.01	737.63	143.77	116.84	5.02	7.85	5.95	5.56	176.14	196.67	65.86	115.34	1416.57	530.46	149.93	121.59	97.2	41.58	102.93	101.6	13.61	14.27	94.03	93.96
636.117	5.41	3.72	4.06	4.37	1848.43	898.11	159.06	125.6	1062.02	483.18	126.06	108.21	1362.57	725.89	143.54	116.82	6.4	8.05	5.97	5.59	175.98	193.53	66.8	115.26	1400.17	521.36	149.68	121.45	94.6	40.26	102.88	101.71	13.09	13.45	94.12	94.12
636.45	5.43	3.72	4.03	4.4	1835.99	892.91	158.9	125.48	1051.4	478.78	126	108.46	1349.69	722.39	143.42	116.6	5.44	7.33	5.99	5.59	175.76	192.27	67.62	115.33	1394.27	520.26	149.56	121.55	92.7	39.82	103.09	101.72	12.75	12.69	94.08	94.21
636.783	5.65	3.74	4.04	4.36	1817.33	882.99	158.54	125.38	1031.64	469.98	125.67	108.04	1334.49	710.43	142.91	116.34	5.9	7.11	5.96	5.58	176.5	189.23	68.38	115.16	1380.09	515.02	149.14	121.2	92.66	39.48	102.9	101.71	13.41	13.21	93.9	94.09
637.116	4.47	2.86	3.98	4.38	1793.39	870.81	158.38	125.14	1013.86	460.76	125.53	107.74	1315.81	699.55	142.81	116.18	5.32	6.97	5.94	5.6	174.76	187.85	69	114.99	1358.19	505.96	148.77	121.13	90.52	37.92	102.72	101.58	12.09	12.39	93.99	94.16
637.449	6.11	4	4.04	4.3	1784.49	864.71	157.59	125.02	1005.36	456.16	124.96	107.58	1307.59	693.25	142.29	115.96	5.5	8.67	5.91	5.63	176.02	187.43	69.67	114.58	1350.37	503.5	148.49	120.66	89.76	39.06	102.5	101.38	13.35	13.57	93.73	94
637.782	7.91	6.06	3.99	4.33	1774.97	862.27	157.78	124.99	998.58	451.14	124.97	107.61	1303.81	688.65	142.14	116.13	7.68	9.79	5.94	5.58	178.38	187.17	70.51	114.57	1346.75	501.48	148.57	120.87	91.96	40.34	102.67	101.65	15.53	14.97	93.85	93.9
638.115	6.57	4.76	4.03	4.41	1758.59	854.85	157.72	124.75	982.14	440.48	124.65	107.52	1289.81	679.91	141.83	115.87	5.2	7.83	6	5.58	175.34	182.71	71.15	114.51	1330.05	495.52	148.35	120.9	88.6	38.66	102.73	101.59	12.51	13.19	94.12	94.13
638.448	4.95	3.78	4.07	4.41	1732.43	838.43	157.14	124.52	962.4	431.44	124.27	107.28	1270.99	664.87	141.81	115.67	5.02	6.47	5.93	5.55	174.38	179.53	71.74	114.48	1308.47	486.72	147.96	120.5	86.18	37.26	102.83	101.67	12.15	11.73	94	93.87
638.781	4.99	4.68	4.02	4.4	1729.95	838.05	156.66	124.35	957.56	428.02	123.82	107.24	1264.17	665.63	141.24	115.41	5.32	8.27	5.94	5.57	175.28	180.47	72.34	114.53	1310.45	486.62	147.45	120.45	86.88	36.3	102.55	101.33	12.79	12.19	93.85	93.93
639.114	4.63	2.38	4.03	4.35	1703.51	824.27	157.01	124.6	936.76	416.52	123.84	107.11	1242.53	650.19	141.18	115.49	5.56	7.53	5.9	5.58	174.18	176.91	73.18	114.38	1288.71	474.32	147.61	120.25	83.24	36.38	102.88	101.7	12.53	11.55	93.93	94.07
639.447	5.51	4.06	4.01	4.4	1690.17	818.01	156.36	124.26	925.38	412.1	123.49	107	1232.79	643.47	140.8	115.23	6.18	7.53	5.85	5.55	173.68	173.77	73.79	114.3	1279.17	472.72	147.1	120.01	82.5	35.78	102.53	101.61	12.11	11.79	93.86	93.89
639.78	4.99	3.74	4.08	4.4	1682.35	812.25	156.3	124.08	915.34	406.7	123.43	106.96	1224.91	637.43	140.52	115.07	5.7	7.49	5.9	5.57	174.26	173.81	74.56	114.06	1268.03	469.3	146.96	120.07	81.14	35.58	102.61	101.53	11.91	12.59	93.98	94.08
640.112	5.07	4.38	4.06	4.35	1657.07	801.69	155.96	123.9	898.2	397.62	123.2	106.75	1209.71	625.81	140.25	114.74	5.62	7.29	5.86	5.5	171.8	171.45	74.85	114.09	1249.61	461.64	146.62	119.81	80.2	35.54	102.5	101.49	11.89	12.25	93.94	94.02
640.445	4.97	4.28	4.1	4.43	1656.87	801.39	155.62	123.9	892.66	394.5	123.17	106.8	1204.13	624.91	140.25	114.74	4.82	7.13	5.9	5.56	172.12	170.11	75.49	114	1250.27	459.2	146.38	119.78	79.78	35.04	102.67	101.61	12.17	11.59	94.04	94
640.778	5.07	3.58	4.07	4.34	1625.89	785.49	155.58	123.58	871	384.54	122.7	106.5	1181.23	609.25	139.83	114.63	4.96	6.55	5.87	5.46	171.34	167.17	76.04	113.81	1226.81	450.98	146.05	119.66	77.88	34.32	102.69	101.45	12.11	11.67	94.02	94.05
641.11	4.97	3.34	4.07	4.37	1618.23	779.31	154.9	123.51	861.48	381.6	122.21	106.42	1174.93	602.81	139.66	114.43	4.66	6.77	5.84	5.49	170.8	165.57	76.61	113.62	1219.21	448.8	145.7	119.3	78.44	33.74	102.43	101.44	11.21	10.91	93.9	93.91
641.443	5.67	4	4.05	4.34	1603.67	772.05	155.05	123.58	848.48	374.56	122.53	106.61	1162.19	595.35	139.51	114.64	5.24	6.47	5.91	5.5	170.28	164.35	77.1	113.84	1208.19	442.48	145.78	119.68	76.44	32.9	102.54	101.6	12.87	11.47	94.23	94.24
641.775	5.27	3.46	4.02	4.33	1597.03	766.65	154.53	123.42	839.76	369.96	122	106.38	1152.33	588.83	139.18	114.14	4.9	6.71	5.77	5.42	171.32	162.15	77.59	113.71	1195.11	439.64	145.56	119.24	75.8	32.42	102.72	101.64	11.41	11.33	93.98	94.09
642.108	7.95	7.02	4.02	4.36	1587.79	763.79	154.57	123.29	836.08	366.34	121.93	106.25	1145.17	587.91	138.8	114.23	8.16	10.37	5.89	5.46	174.14	164.95	77.97	113.52	1193.61	439.44	145.27	119.17	77.92	35.9	102.59	101.64	14.09	14.97	94.22	94.12
642.44	5.01	3.44	4.04	4.32	1564.15	753.91	154.17	122.87	818.58	358.52	121.42	105.85	1133.35	577.81	138.37	113.57	5.28	7.03	5.83	5.48	169.58	160.41	78.25	113.32	1180.03	429.82	144.68	118.95	74.68	32.94	102.51	101.57	11.29	10.31	93.83	93.77
642.773	5.43	3.96	4.08	4.44	1546.65	743.41	153.89	122.8	803.52	353.6	121.36	106.11	1114.05	565.33	138.25	113.72	4.38	6.79	5.87	5.54	167.84	157.73	78.9	113.26	1163.93	425.04	144.62	118.86	72.28	31.28	102.49	101.5	10.71	11.61	94.03	94.07
643.105	5.47	3.56	4.09	4.4	1537.85	737.93	153.34	122.66	793.28	348.9	121.06	105.86	1106.53	560.41	137.84	113.24	5.78	6.89	5.9	5.52	167.5	157.31	79.15	113.08	1152.15	421.82	144.17	118.38	73.08	31.56	102.52	101.49	11.57	11.33	94.03	94.01
643.437	4.99	4.1	4.05	4.32	1518.93	728.69	153.43	122.48	781.3	342.9	120.86	105.92	1094.23	551.75	137.59	113.25	5.18	7.67	5.85	5.46	166.56	154.69	79.74	112.93	1139.99	417.22	143.99	118.61	70.74	31.92	102.59	101.48	11.39	11.61	94.12	94.03
643.769	5.15	3.72	4.1	4.4	1499.19	723.07	152.8	122.47	768.2	335.82	120.31	105.65	1078.69	543.69	137.28	113.04	5.84	6.99	5.83	5.48	166	153.59	80.09	112.7	1124.83	409.32	143.7	118.39	70.38	30.9	102.38	101.36	10.67	10.35	93.94	94.03
644.101	5.07	4.26	4.07	4.37	1477.93	708.91	152.71	122.39	749.78	326.94	120.45	105.91	1060.79	535.03	137.22	113.18	5.34	5.89	5.83	5.46	163.78	149.55	80.58	113.14	1106.21	403.62	143.67	118.56	69.82	29.24	102.72	101.71	10.93	9.65	94.15	94.21
644.434	5.23	4.64	4.11	4.43	1472.93	707.21	152.42	122.45	747.34	325.82	120.23	105.63	1053.95	530.41	136.79	113.07	5.42	6.57	5.84	5.46	164.6	150.49	81.02	112.85	1102.05	400.48	143.35	118.23	67.3	30.02	102.69	101.86	9.97	11.03	94.13	94.15
644.766	5.55	4.86	4.05	4.4	1464.73	701.57	151.7	121.82	735.3	321.3	119.72	105.37	1047.11	524.43	136.14	112.44	5.8	6.65	5.84	5.47	163.86	148.69	81.2	112.52	1095.25	398.12	142.71	117.77	68.46	29.08	102.29	101.37	10.91	10.89	93.87	94.05
645.098	5.21	3.76	4.11	4.45	1446.45	692.49	151.59	121.66	726.24	314.78	119.74	105.37	1032.53	517.25	136.06	112.59	4.38	6.35	5.88	5.49	162.88	146.85	81.54	112.55	1080.87	392.44	142.46	117.8	66.62	28.06	102.41	101.68	10.01	10.33	94.1	94.07
645.43	4.99	3.9	4.12	4.38	1424.05	680.85	151.25	121.37	710.34	309.92	119.23	105.17	1017.69	506.09	135.74	112.28	5.04	5.97	5.85	5.45	162	143.91	81.86	112.17	1066.89	386.16	141.97	117.52	65.9	27.36	102.34	101.35	10.47	9.79	93.97	94.01
645.762	5.49	3.42	4.09	4.43	1422.53	683.03	150.58	121.08	708.76	307.88	119	104.87	1014.49	506.21	135.05	111.87	5.38	6.53	5.83	5.48	162.84	144.09	81.92	112.07	1065.71	385.12	141.67	117.09	66.02	28.18	102.16	101.47	10.27	10.37	93.89	93.91
646.094	5.53	3.72	4.06	4.38	1401.85	672.67	150.34	121.26	695.94	301.94	118.92	105.15	998.25	495.49	135	112.14	4.88	6.67	5.74	5.45	162.78	142.61	82.46	112.27	1048.33	379.44	141.75	117.43	63.66	29.2	102.52	101.45	10.35	10.31	94.24	94.24
646.425	5.53	4.24	4.1	4.35	1390.67	663.97	149.91	121.12	687.98	297.76	118.71	104.88	987.71	492.03	134.74	111.72	5.38	6.97	5.81	5.44	161.04	140.41	82.72	112.02	1041.53	376.96	141.07	117.1	64.02	27	102.4	101.46	10.37	10.25	94.06	93.98
646.757	5.55	4.76	4.11	4.31	1373.69	654.41	149.6	120.58	673.28	291.86	118.34	104.77	971.37	480.95	134.22	111.69	5	6.97	5.81	5.47	160.8	139.65	82.89	111.75	1023.37	370.3	140.66	116.7	62.44	28.3	102.28	101.53	10.53	9.61	93.96	94
647.089	5.11	3.64	4.12	4.41	1361.35	650.11	149.44	120.71	663.98	290.42	118.26	104.87	963.77	476.21	134.46	111.58	5.34	6.35	5.8	5.45	160.18	138.49	83.24	111.9	1014.61	366.72	140.52	116.75	62.24	27.16	102.45	101.5	10.05	10.29	93.98	94.31
647.421	4.43	4.14	4	4.27	1342.65	639.85	149.07	120.49	652.02	283.78	118.01	104.84	946.97	466.65	133.83	111.56	4.2	6.13	5.74	5.39	159.02	135.21	83.63	111.67	999.57	360.5	140.26	116.94	61.54	26.52	102.46	101.5	10.29	8.83	94.21	94.32
647.752	4.75	2.72	4.06	4.42	1333.27	635.31	148.68	120.19	644.78	281.42	117.74	104.5	939.31	464.75	133.2	111.05	4.5	5.91	5.77	5.42	156.86	134.99	83.77	111.63	993.91	357.42	139.82	116.35	61.02	26.42	102.1	101.35	9.93	9.11	93.87	94.01
648.084	5.23	4.08	4.13	4.45	1326.67	632.17	148.27	120.28	641.1	276.62	117.72	104.45	935.81	460.55	133.29	111.18	4.84	6.19	5.84	5.43	157.24	133.67	84.16	111.73	984.67	355.82	139.68	116.49	60.86	25.8	102.39	101.67	9.83	10.59	94.3	94.15
648.415	5.41	3.44	4.07	4.35	1308.31	622.61	148.03	119.98	628.78	273.04	117.54	104.48	922.01	455.71	132.91	110.82	4.6	5.77	5.78	5.39	158.58	131.89	84.4	111.49	970.97	350.1	139.34	116.46	58.98	26	102.38	101.64	9.37	9.97	94.17	94.15
648.747	5.67	4.26	4.09	4.39	1285.77	613.61	147.37	119.76	617.12	268.7	117.1	104.24	906.63	443.75	132.38	110.66	4.56	6.63	5.8	5.45	157.48	130.31	84.47	111.3	957.33	344.7	138.94	116.15	58.82	25.82	102.24	101.44	10.05	10.15	93.98	94.05
649.078	5.21	3.8	4.05	4.34	1279.67	608.49	146.94	119.52	607.76	263.5	116.83	104.3	897.23	439.05	131.92	110.37	5.36	5.87	5.76	5.44	156.46	129.21	84.66	111.03	948.49	343.3	138.41	115.76	57.66	24.64	102.14	101.24	9.91	9.01	93.98	94.1
649.41	3.95	3.82	4.07	4.36	1268.35	601.97	146.58	119.31	601.5	262.02	116.78	104.18	887.71	433.63	131.54	110.15	5.44	5.79	5.79	5.44	155.08	126.93	84.89	111.06	943.29	336.84	138.07	115.44	55.96	24.78	102.35	101.36	8.95	9.01	93.89	94.18
649.741	5.23	3.04	4.14	4.4	1251.21	594.51	146.51	119.31	592.96	255.74	116.49	104.37	878.13	429.21	131.37	110.22	4.72	6.35	5.81	5.43	154.32	127.03	85.13	110.83	930.55	332.02	138.04	115.59	56.82	24.42	102.24	101.55	10.03	9.63	94.23	94.21
650.073	5.01	3.2	4.11	4.38	1233.11	587.69	145.63	118.82	580.9	253.18	116.16	104.01	862.85	421.39	130.66	110.03	5.04	6.33	5.8	5.46	152.68	125.69	85.23	110.58	914.67	328.4	137.53	115.21	55.2	24.1	102.33	101.26	10.09	9.31	93.91	94.25
650.404	5.73	4.56	4.14	4.4	1219.73	581.05	145.45	118.58	573.9	250.3	115.89	103.78	850.53	416.53	130.55	109.79	4.7	6.39	5.82	5.44	153.12	124.91	85.44	110.72	906.55	326.18	137.13	114.99	55.22	23.48	102.03	101.39	8.79	9.41	94.12	93.85
650.735	4.91	4.2	4.09	4.41	1200.73	569.73	144.93	118.63	562.1	245.56	115.63	103.71	837.83	408.09	130.18	109.44	4.14	5.43	5.84	5.47	151.08	122.19	85.56	110.49	891.27	320.1	136.71	114.97	54.6	24.82	102.18	101.32	10.07	9.11	93.96	94.19
651.066	4.79	3.26	4.12	4.41	1187.81	563.95	144.52	118.69	555.78	241.98	115.67	103.79	826.85	402.15	130.07	109.66	3.4	6.07	5.85	5.48	150.26	121.39	85.86	110.57	879.63	315.68	136.47	114.92	53.46	23.68	102.29	101.54	9.21	9.31	94.19	94.27
651.397	5.39	3.5	4.11	4.41	1182.35	564.45	144.12	118.34	551.68	240.52	115.41	103.92	825.15	400.19	129.66	109.38	4.06	6.25	5.82	5.49	151.38	121.33	86.15	110.41	877.75	314.16	136.36	114.77	53.86	23.22	102.21	101.6	9.85	8.13	94.25	94.04
651.729	5.11	3.92	4.09	4.45	1164.13	554.45	143.69	117.96	541.98	237.46	114.89	103.85	812.07	393.69	129.26	109.25	4.62	6.47	5.82	5.5	150.74	119.31	86.27	110.29	866.71	309.4	135.87	114.27	53.26	23.08	102.11	101.43	8.21	9.63	94.18	94.11
652.06	5.55	4.46	4.19	4.44	1148.23	547.99	143.65	118.15	532.26	234.18	115.23	103.5	798.01	388.37	128.91	109.21	5.82	6.81	5.89	5.51	151.28	118.25	86.42	110.28	855.21	304.92	135.49	114.44	53.1	25.12	102.21	101.47	9.33	10.11	94.35	94.31
652.391	4.85	4.02	4.17	4.48	1128.79	537.67	142.77	117.55	521.24	229.42	114.75	103.23	784.49	380.39	128.55	108.64	4.5	5.71	5.87	5.56	149.5	115.33	86.49	109.88	837.35	297.94	134.68	113.8	52.48	22.7	102.06	101.34	8.53	8.83	94.03	94.02
652.722	5.79	4.38	4.14	4.45	1123.85	538.65	142.71	117.69	519.32	227.32	114.68	103.57	781.13	378.59	128.34	109.02	4.32	7.05	5.85	5.52	149	114.97	86.79	110.2	836.61	298.88	134.81	114.05	51.88	23.96	102.4	101.6	9.77	9.43	94.17	94.25
653.053	5.11	3.34	4.02	4.37	1113.61	527.87	141.79	117.11	509.84	222.44	114.31	103.24	769.37	372.45	127.7	108.47	4.9	5.93	5.76	5.48	147.8	113.83	86.81	109.65	822.43	293.48	134.13	113.66	50.4	22.9	102.14	101.32	8.59	8.61	94.08	93.98
653.383	4.47	4.04	4.14	4.37	1100.31	522.49	141.45	116.95	503.32	221.16	114.11	103.24	756.89	368.05	127.34	108.21	5.04	6.03	5.8	5.49	148.54	112.87	86.93	109.56	813.57	289.06	133.74	113.5	49.62	21.42	102.07	101.24	9.45	8.35	94.08	94.04
653.714	5.41	4.56	4.15	4.4	1088.19	515.23	141.11	116.62	496.26	216.48	113.87	103.08	748.01	361.97	126.87	108.17	5.7	5.87	5.78	5.43	147.6	111.79	87.15	109.56	802.41	287.78	133.43	113.48	49.46	21.96	101.9	101.27	9.09	9.11	94.09	93.93
654.045	4.65	3.76	4.14	4.45	1064.79	505.87	140.53	116.42	484.56	214.12	113.57	102.88	732.67	354.77	126.41	107.87	4.58	5.89	5.86	5.55	145.18	110.39	87.23	109.4	788.21	279.84	132.84	113.12	48.4	21.14	101.88	101.32	9.01	8.81	93.77	94.06
654.376	5.33	3.66	4.15	4.38	1048.75	501.45	140.14	116.35	476.9	209.8	113.42	103	722.83	350.31	126.32	107.73	4.14	5.91	5.92	5.57	145.58	108.31	87.32	109.23	774.43	276.8	132.47	112.94	46.92	21.06	102	101.32	9.67	8.79	93.97	93.88
654.706	5.17	3.84	4.09	4.43	1044.19	498.19	139.93	116.26	475.02	210.04	113.44	103.01	717.71	348.03	126.01	107.65	4.58	6.27	5.91	5.6	144.94	108.21	87.51	109.27	770.91	274.82	132.43	113.09	48.18	21.52	102.04	101.47	8.27	8.37	94.16	94.05
655.037	4.77	3.32	4.15	4.43	1022.45	485.03	139.28	116.03	461.06	204.22	112.98	102.58	699.25	338.97	125.66	107.68	4.24	5.25	5.88	5.48	143.4	105.19	87.76	109.15	753.75	268.42	131.98	112.58	45.84	21.08	101.95	101.53	7.93	8.23	93.91	93.92
655.368	5.37	3.72	4.16	4.43	1014.57	482.41	138.71	115.94	459.32	203.4	112.9	102.78	695.27	335.31	125.15	107.21	3.96	5.59	5.88	5.46	144.74	106.25	87.69	108.92	748.03	267.72	131.55	112.52	46.56	21.24	101.92	101.27	8.61	8.07	94.08	93.94
655.698	4.63	3.84	4.15	4.41	994.69	473.85	138.38	115.71	448.08	200	112.9	102.73	680.51	330.01	124.91	107.25	3.94	5.41	5.89	5.54	142.82	103.77	87.77	108.9	738.11	262.32	130.89	112.25	45.66	20.48	101.96	101.22	8.05	8.53	93.89	93.95
656.029	4.11	3.86	4.12	4.44	993.23	471.85	137.95	115.36	447.52	198.06	112.64	102.77	679.81	327.25	124.49	107.24	3.48	5.11	5.99	5.58	143.62	103.61	87.88	108.83	733.31	260.72	130.73	112.14	45.48	21.32	101.98	101.39	9.47	8.09	94.02	94.09
656.359	5.35	4.24	4.1	4.45	990.21	471.51	137.9	115.13	444.6	198.26	112.31	102.75	674.05	326.13	124.09	107.08	4.32	5.23	6	5.54	144.76	104.07	88.26	108.65	730.53	261.16	130.38	111.93	45.98	21.04	101.93	101.42	8.29	8.33	94.02	94.08
656.69	4.63	4.38	4.14	4.36	962.27	457.87	136.94	114.97	431.3	192.86	112.19	102.6	657.77	319.07	123.59	106.76	5.14	6.67	5.97	5.53	142.56	102.03	88.11	108.67	710.07	253.18	129.95	111.86	44.04	19.82	101.78	101.08	8.23	8.37	93.7	94.1
657.02	3.97	2.78	4.05	4.42	953.21	453.41	136.59	114.89	428.42	190.8	112	102.59	651.03	313.47	123.28	106.68	4.58	5.29	5.94	5.58	141.08	99.49	88.19	108.55	702.99	250.44	129.5	111.62	45.3	20.64	102.06	101.36	8.25	7.89	94.02	93.99
657.35	3.97	4.04	4.11	4.39	937.19	448.35	136.26	114.62	420.38	188.7	111.82	102.79	640.27	309.25	123.12	106.61	4.56	5.33	5.97	5.55	140.16	98.43	88.49	108.48	694.63	247.44	129.37	111.54	43.46	20.64	101.96	101.5	7.21	7.43	94.19	94.02
657.681	4.89	4.12	4.13	4.39	933.23	444.67	135.79	114.35	418.58	185.4	111.56	102.54	635.65	306.67	122.54	106.32	3.9	5.91	5.99	5.6	142.66	98.17	88.46	108	688.23	245.52	128.66	111.16	43.14	20.2	101.89	101.15	8.33	8.27	94.06	94.07
658.011	4.81	3.84	4.15	4.36	924.95	441.43	135.49	114.37	413.86	185.22	111.61	102.45	629.65	305.13	122.32	106.08	4.48	5.57	6.05	5.61	142.92	97.87	88.59	108.05	682.41	243.54	128.49	111.21	42.88	19.6	102.04	101.35	8.11	8.05	94.01	94.19
658.341	4.41	3.62	4.21	4.5	906.41	432.71	134.81	114.23	401.92	181.42	111.21	102.39	615.43	298.41	121.97	106.29	5.12	4.79	6.07	5.7	139.22	97.01	88.8	108	666.69	237.22	128.16	110.98	41.88	18.8	101.93	101.46	7.59	7.77	93.95	93.95
658.671	7.41	6.06	4.17	4.43	899.37	431.77	134.51	114.1	401.26	181.7	111.28	102.27	610.13	297.35	121.69	106.06	7.12	8.41	6.1	5.58	143.26	98.17	88.77	107.98	664.25	236.52	127.81	111.11	44.84	20.46	101.9	101.33	10.55	9.91	94.05	94.01
659.001	5.17	3.92	4.13	4.44	881.53	419.39	134.19	113.99	392.02	176.7	110.92	102.33	596.65	290.63	121.56	105.89	5.4	6.19	6.11	5.67	140.38	95.59	88.83	107.76	648.39	232.7	127.44	110.79	41.22	19.28	101.95	101.24	9.57	8.35	94.15	94.21
659.331	4.45	3.94	4.15	4.38	867.59	413.85	133.54	113.47	385.54	174.08	110.77	102.32	586.35	286.47	121.11	105.9	4.32	5.57	6.17	5.68	139.94	94.21	89	107.85	639.23	228.56	127.01	110.63	41.06	18.76	101.95	101.4	7.89	7.43	93.98	94.16
659.661	4.81	3.94	4.18	4.45	853.21	408.31	132.84	113.14	380.34	170.88	110.35	102.11	578.95	282.91	120.3	105.44	4.16	4.91	6.1	5.7	140.24	92.07	89.01	107.71	630.35	226.42	126.65	110.16	40.5	18.4	101.71	100.98	7.81	7.91	93.95	93.79
659.991	4.75	3.58	4.15	4.4	846.07	404.21	132.97	112.99	376.88	171.96	110.44	102.17	572.69	278.01	120.43	105.54	3.84	5.07	6.11	5.71	138.32	92.09	89.38	107.64	624.11	222.56	126.32	110.34	40.46	19.28	101.88	101.31	8.15	7.73	94.22	93.76
660.321	5.47	4.14	4.14	4.41	835.53	397.73	132.33	113.06	369.52	168.9	110.29	102.2	564.77	274.89	120.18	105.55	3.68	5.19	6.13	5.73	138.66	91.13	89.45	107.52	613.75	220.34	126.16	110.33	40.72	17.52	101.94	101.39	8.47	8.15	94.03	94.16
660.651	4.23	4.06	4.21	4.46	820.37	393.89	132.09	112.91	363.08	165.86	109.97	102.1	554.27	271.29	119.66	105.24	4.76	5.77	6.21	5.73	137.48	89.85	89.58	107.44	603.67	216.32	125.88	110.11	40.48	18.72	102.08	101.35	8.25	7.33	94.08	94.03
660.981	6.33	5.5	4.2	4.44	806.79	387.93	131.64	112.81	359.82	163.96	109.97	102.13	545.87	267.07	119.44	105.27	5.48	7.41	6.29	5.83	138.46	89.41	89.5	107.34	597.03	214.04	125.35	109.89	40.32	20.06	101.91	101.49	9.05	9.29	94.15	94.03
661.31	6.89	6.14	4.17	4.48	807.85	386.91	131.06	112.6	356.96	164.16	109.76	101.95	543.67	266.95	118.94	104.93	7	7.11	6.26	5.83	140.06	89.07	89.47	107.2	593.17	213.94	125.17	109.71	40.3	19.98	101.71	101.32	9.01	9.97	93.96	94.07
661.64	4.63	4.18	4.2	4.51	789.51	377.39	130.21	111.79	349.82	160.64	109.45	101.56	531.91	259.07	118.09	104.57	4.14	5.51	6.29	5.83	137.3	86.89	89.38	106.62	582.39	207.08	124.15	109.18	38.36	17.92	101.56	101.06	7.33	7.45	93.81	93.78
661.97	4.63	3.86	4.14	4.43	778.61	373.83	130.03	111.84	345.84	158.94	109.45	101.69	526.67	256.25	118.22	104.68	5.22	6.29	6.28	5.8	137.18	85.87	89.67	107.05	572.59	206.86	124.12	109.01	38.56	18.2	101.75	100.97	8.17	7.91	93.78	93.79
662.299	4.77	3.76	4.17	4.43	771.11	370.17	130.01	111.99	342.26	157.66	109.26	101.85	519.87	254.35	118.1	104.73	4.86	5.31	6.3	5.85	136.44	85.05	89.98	106.88	568.11	202.94	123.97	109.38	37.5	16.9	101.95	101.19	8.09	7.37	93.99	93.94
662.629	6.09	4.6	4.18	4.43	762.23	364.91	129.42	111.74	336.98	154.86	109.08	101.45	510.53	251.35	117.71	104.49	4.86	5.53	6.32	5.88	137.3	84.55	90.09	106.73	559.91	201.72	123.63	109.11	37.6	17.3	101.63	101.17	8.85	8.43	94.09	93.93
662.958	5.65	4.88	4.19	4.41	751.89	359.47	129.17	111.74	332.4	153.36	109.03	101.63	505.07	248.97	117.5	104.54	5.58	5.57	6.3	5.89	136.24	83.53	90.31	106.81	549.81	198.98	123.42	109.04	37.22	17.12	101.88	101.46	7.97	6.87	94.11	94.09
663.288	4.31	4.26	4.06	4.32	737.87	353.95	128.46	111.26	326.38	151.04	108.97	101.5	494.53	242.59	117.25	104.12	4.42	5.47	6.35	5.88	135.3	83.21	90.35	106.57	541.31	194.08	122.95	108.73	36.56	17.04	101.68	101.01	7.45	7.57	94.08	93.8
663.617	4.63	3.46	4.12	4.41	728.75	349.47	128.19	111.46	323.74	149.34	108.66	101.49	485.51	240.73	116.68	104.11	4.8	5.45	6.42	5.9	136.16	81.27	90.36	106.49	534.47	192.42	122.44	108.64	35.12	17.3	101.45	101.31	8.21	7.03	94.12	93.76
663.947	4.79	3.26	4.23	4.45	712.51	342.29	127.99	111.19	316.68	147.12	108.64	101.55	474.63	235.07	116.6	104.04	4.36	5.57	6.46	5.92	135.06	79.77	90.36	106.39	524.75	188.02	122.39	108.39	36.18	16.06	101.78	101.32	7.63	7.97	93.95	93.89
664.276	5.23	4.16	4.11	4.4	701.61	338.03	127.32	110.84	310.92	144.66	108.29	101.58	469.33	232.13	116.21	103.71	4.72	5.25	6.45	5.94	134.06	78.59	90.44	106.27	515.57	186.04	121.86	108.24	34.94	16.6	101.83	101.26	7.07	7.51	93.89	94.04
664.605	6.03	4.1	4.11	4.43	694.33	333.89	127.04	110.68	306.92	143.42	108.14	101.44	463.27	228.59	116.04	103.76	4.7	6.09	6.5	6.01	134.74	79.51	90.66	105.95	510.63	185.78	121.54	108.13	35.78	16.58	101.75	101.26	8.51	6.69	93.81	93.83
664.935	5.21	3.66	4.18	4.45	682.59	329.07	126.68	110.8	303.28	140.96	108.32	101.47	456.91	225.53	115.84	103.86	3.7	5.83	6.51	5.97	133.36	77.73	90.93	106.35	502.31	182.24	121.4	108.46	34.38	15.5	101.77	101.34	7.27	6.33	94.11	94.21
665.264	5.41	5.06	4.21	4.43	675.27	326.31	125.87	110.21	299.36	139.96	107.69	101.05	450.05	224.31	115.06	103.28	5.04	6.13	6.56	6.05	133.24	77.95	90.48	105.88	496.19	178.7	120.61	107.63	35.5	16.82	101.42	101.12	8.29	7.55	93.63	93.77
665.593	4.49	4.32	4.16	4.46	665.13	319.95	126.07	110.44	296.2	138.66	108.05	101.49	443.17	220.55	115.07	103.65	4.24	6.05	6.66	6.09	133.6	76.49	91.21	106.25	490.01	177.88	121.03	107.96	33.98	17.14	101.47	101.49	7.83	8.07	94.12	94.06
665.922	4.61	3.8	4.14	4.42	661.49	320.65	125.69	110.19	293.76	137.2	107.69	101.31	440.45	218.51	114.72	103.46	4.84	6.03	6.6	6.07	133.76	75.81	91.08	106.04	483.27	175.58	120.15	107.82	34.12	16.08	101.67	101.36	7.61	7.05	93.83	94.1
666.251	4.35	4.7	4.11	4.43	647.43	313.43	125.28	110.2	289.58	136.36	107.58	101.34	431.89	214.81	114.71	103.42	3.6	5.33	6.64	6.07	133.26	74.77	91.26	105.98	477.15	173.16	119.94	107.67	33.2	15.3	101.73	101.19	6.75	7.01	94.06	93.96
666.58	4.21	4.16	4.17	4.44	639.71	309.91	124.55	109.84	284.14	135.14	107.42	101.11	424.87	212.15	114.2	103.18	3.92	4.75	6.66	6.17	132.32	74.67	91.06	105.77	467.33	170.62	119.7	107.48	32.74	16.22	101.69	101.3	6.15	7.11	93.91	93.89
666.909	4.87	3.42	4.26	4.54	626.61	302.33	124.34	109.67	278.8	131	107.3	101	416.17	207.99	113.82	102.96	4.76	5.93	6.76	6.24	132.36	73.09	91.28	105.65	457.81	166.52	119.5	107.18	32.66	15.54	101.56	101.06	7.03	6.85	93.83	93.87
667.238	4.93	3.96	4.23	4.47	619.75	300.15	124.28	109.64	276.44	130	107.47	101.3	413.55	207.59	113.84	103	4.14	5.19	6.77	6.31	132.58	72.35	91.59	105.5	454.71	168.24	119.46	107.34	32.66	14.52	101.79	101.39	7.69	7.91	94.23	94.21
667.567	5.29	3.72	4.18	4.45	610.99	297.35	123.57	109.43	273.82	129.44	107.1	101.06	406.23	204.31	113.34	102.7	4.84	4.95	6.74	6.23	133.22	72.77	91.45	105.29	447.99	163.06	118.88	106.84	32.42	15	101.81	101.08	7.69	7.21	93.85	93.78
667.896	5.41	4.24	4.15	4.38	602.93	295.65	123.34	109.42	269.7	129.14	107.18	101.09	400.47	202.25	113.14	102.65	4.92	6.19	6.81	6.21	133.94	72.17	91.8	105.36	442.03	163.04	118.66	106.9	31.92	16.04	101.57	101.15	8.43	7.69	93.94	93.87
668.224	5.15	4.5	4.15	4.38	589.93	287.31	123.13	109.34	262.98	125.2	107.09	101.14	391.35	197.01	112.95	102.95	4.98	5.67	6.9	6.32	131.48	70.49	91.92	105.45	432.07	159.24	118.57	107.15	30.94	15.02	101.87	101.32	7.71	7.85	94.11	94.15
668.553	4.21	3.86	4.15	4.46	588.39	286.35	122.8	108.95	264.26	125.94	106.81	101.07	388.93	196.65	112.85	102.7	4.2	5.11	6.96	6.41	132.06	70.39	92.02	105.28	431.67	158.88	118.32	106.88	31.58	14.56	101.68	101.11	7.51	7.87	94.24	94.02
668.882	4.55	4.22	4.16	4.46	576.05	280.61	122.3	108.87	258.02	122.82	106.69	100.96	381.43	194.31	112.59	102.58	4.98	5.15	6.89	6.39	131.98	69.57	92.28	105.39	422.33	154.78	117.71	106.74	31.08	14.92	101.76	101.18	7.87	7.21	94.03	94.11
669.21	3.99	3.68	4.16	4.41	570.37	278.55	122.09	108.94	256.16	123.6	106.58	101.22	377.57	190.45	112.31	102.61	3.92	4.53	6.93	6.39	131.22	68.23	92.35	105.25	416.59	152.46	117.52	106.59	31.36	14.36	101.7	101.2	6.01	6.57	93.97	94.09
669.539	4.73	3.16	4.09	4.44	558.59	272.17	121.44	108.59	249.56	119.98	106.65	100.93	369.19	188.07	112.03	102.46	4.38	4.53	6.95	6.39	130.2	66.65	91.98	104.99	407.43	150.26	117.07	106.43	30.6	14.68	101.42	101.14	6.61	7.15	93.8	93.85
669.867	5.39	5.06	4.17	4.46	550.93	270.31	121.2	108.52	248.78	119.28	106.5	101.01	365.09	186.97	111.79	102.34	5.18	5.41	7.1	6.47	131.86	67.41	92.35	105.05	404.57	149.44	117.02	106.36	31.2	15.18	101.64	101.13	6.97	7.23	93.94	93.78
670.196	5.43	4.6	4.1	4.41	541.77	265.55	120.85	108.49	244.82	118.54	106.29	100.8	361.59	184.19	111.55	101.93	4.72	5.97	7.08	6.43	131.06	67.11	92.48	104.86	398.59	147.2	116.73	106.1	31.22	14.76	101.8	101.2	7.27	7.61	93.88	94.04
670.524	4.29	4.38	4.18	4.42	536.17	264.83	120.5	108.14	242.46	116.44	106.01	100.63	354.25	181.21	111.26	101.88	4.6	5.79	7.18	6.55	131.14	65.41	92.33	104.57	391.89	144.46	116.32	105.76	29.68	14.4	101.38	100.95	6.65	7.39	93.82	93.99
670.853	4.23	3.78	4.13	4.45	529.91	259.63	120.77	108.24	238.1	114.62	106.06	101.04	350.39	177.97	111.42	102.22	4.42	4.71	7.19	6.59	129.1	65.59	92.78	105.15	387.83	143.4	116.49	106.13	28.9	14.46	101.67	101.4	6.43	6.33	94.1	94.12
671.181	6.23	5.92	4.18	4.43	522.39	257.01	120.09	108.09	235.88	115.66	106.04	100.72	344.89	179.25	110.71	101.9	6.52	7.91	7.23	6.59	131.9	65.69	92.86	104.59	381.25	143.58	116.08	106.04	30.54	16.06	101.42	100.95	8.57	8.61	93.87	93.88
671.509	5.33	3.74	4.12	4.43	509.55	251.79	119.92	107.6	231.9	111.8	105.74	100.56	340.55	174.17	110.62	101.88	4.84	5.33	7.2	6.59	129.82	62.57	93.1	104.65	375.03	139.3	115.73	106	28.18	14.04	101.53	101.31	6.93	6.63	94.03	93.87
671.838	4.87	4.32	4.2	4.53	506.07	251.69	119.66	107.92	229.44	111.52	105.7	100.87	337.17	173.25	110.57	101.81	5.02	5.79	7.32	6.7	130.86	62.21	93.05	104.61	370.37	138.18	115.46	105.78	29.36	14.7	101.72	101.25	7.85	7.15	93.96	94.15
672.166	5.65	3.6	4.16	4.43	495.75	245.13	119.06	107.43	224.82	109.38	105.6	100.54	328.35	169.67	110.32	101.63	4.8	4.91	7.33	6.74	129.68	62.83	93	104.5	362.37	136.14	115.23	105.53	28.12	13	101.45	100.99	7.55	7.03	93.87	93.89
672.494	5.17	3.72	4.16	4.43	488.57	243.81	118.83	107.45	223.34	108.92	105.78	100.41	322.81	168.19	109.76	101.69	4.58	5.65	7.45	6.67	129.94	61.49	93.42	104.29	359.91	134.94	115.04	105.56	28.78	13.04	101.6	101.19	7.41	6.49	94.21	93.95
672.822	4.09	4.1	4.1	4.45	483.21	239.65	118.44	107.49	221.64	108.48	105.44	100.5	318.81	167.21	109.61	101.36	5.1	4.73	7.46	6.75	130.6	60.67	93.14	104.17	353.77	133.14	114.72	105.29	27.7	13.36	101.21	101.04	7.85	7.63	93.92	93.81
673.15	5.43	4.56	4.11	4.41	477.05	237.73	118.18	107.28	219.04	107.64	105.37	100.69	317.07	165.67	109.7	101.49	4.1	5.61	7.42	6.8	130.6	61.41	93.34	104.18	350.81	131.96	114.47	105.39	28.66	13.32	101.54	100.99	7.77	7.03	93.83	93.7
673.478	5.85	4.5	4.13	4.39	469.65	233.49	118.01	107.1	214.96	105.28	105.39	100.57	311.79	162.35	109.33	101.34	5.6	5.49	7.5	6.75	129.54	60.35	93.67	104.2	342.03	129.76	114.28	105.28	28.66	14.1	101.67	101.06	8.07	7.57	93.68	93.73
673.806	5.25	3.52	4.08	4.31	463.01	229.89	117.77	107.27	213.54	104.26	105.39	100.65	306.89	159.05	109.27	101.53	4.2	5.25	7.54	6.79	128.74	59.37	93.99	104.22	340.07	127.08	114.15	105.2	27.36	14	101.55	101.22	6.79	6.41	93.87	93.94
674.134	4.37	4.14	4.09	4.4	454.59	226.33	117.42	106.85	208.08	102.6	105.06	100.44	302.11	158.55	109.09	101.17	4.68	5.35	7.53	6.89	127.14	57.73	93.74	104.19	332.31	125.8	113.74	105.35	26.8	13.44	101.25	101.26	6.01	6.37	93.95	93.91
674.462	4.25	4.3	4.06	4.4	448.21	223.49	117.01	106.82	206.98	102.5	105	100.51	297.95	155.63	108.67	101.03	4.04	4.79	7.56	6.91	127.76	57.25	93.85	104	329.61	124.6	113.54	104.99	26.32	12.7	101.34	101.12	6.07	6.41	93.99	94.06
674.79	3.97	4.68	4.15	4.38	442.01	220.65	116.84	106.71	202.86	99.42	104.97	100.17	292.87	153.07	108.54	101.04	4.3	5.41	7.65	6.98	127.3	56.05	94.15	103.97	323.15	121.52	113.3	104.77	26.38	13.08	101.43	101.13	5.49	5.87	94.02	93.78
675.118	4.33	4.04	4.15	4.4	436.89	219.05	116.75	106.58	201.4	98.62	104.75	100.37	288.51	152.63	108.49	101.13	3.62	4.55	7.76	7.01	128.34	55.89	94.43	103.8	318.57	121.72	113.23	104.93	25.52	13.32	101.51	101.16	6.57	6.77	93.99	94.03
675.445	4.55	4.26	4.13	4.4	427.37	214.17	116.4	106.56	199.14	97.24	104.72	100.32	283.91	150.63	108.21	101.04	4.78	5.99	7.78	7.02	127.72	56.29	94.27	103.97	314.05	119.52	113.02	104.93	26.24	12.92	101.28	101.23	6.39	6.75	93.86	93.87
675.773	4.51	3.28	4.12	4.36	420.29	209.99	115.96	106.2	194.1	95.96	104.46	100.07	277.75	147.71	107.84	100.71	4.46	4.85	7.8	7.07	126.32	54.99	94.25	103.64	307.61	117.42	112.57	104.39	25.54	11.56	101.17	101.04	6.87	6.93	93.69	93.59
676.101	4.97	3.96	4.09	4.34	414.19	208.95	115.98	106.34	191.18	95.32	104.63	100.11	272.87	146.85	107.75	100.85	4.68	5.27	7.84	7.1	126.42	55.69	94.67	103.94	304.75	116.36	112.63	104.67	25.02	11.84	101.57	101.22	7.09	7.11	93.85	93.85
676.428	4.51	3.96	4.19	4.42	405.91	204.87	115.6	106.31	189	93.28	104.61	100.29	269.19	145.01	107.71	100.82	4.6	5.47	7.97	7.17	125.48	53.19	94.93	103.64	298.07	114.46	112.31	104.67	25.56	12.46	101.46	101.27	6.79	7.13	93.82	93.89
676.756	5.89	4.18	4.14	4.37	402.33	204.53	115.48	105.93	187.4	95.12	104.34	100.24	267.47	143.71	107.44	100.52	5.64	5.37	7.94	7.16	127.24	54.09	94.86	103.39	296.93	113.4	112.05	104.57	25.7	13.14	101.33	101.02	7.19	6.07	93.93	93.74
677.083	5.81	3.2	4.18	4.41	401.15	200.91	115.21	105.99	186.38	93.02	104.57	100.16	264.11	141.87	107.25	100.64	4.44	5.39	8.1	7.27	127.2	52.73	95.05	103.66	293.71	113.86	112.03	104.46	24.82	11.98	101.44	101.38	7.15	6.59	94	93.9
677.411	3.79	4	4.13	4.47	390.79	196.29	114.8	105.75	182.22	91.08	103.97	99.89	257.77	139.69	107.12	100.45	4.22	5.37	8.12	7.31	125.86	53.79	95.11	103.33	286.83	109.4	111.62	104.28	24.54	12.06	101.28	101.09	7.29	6.43	93.68	93.68
677.738	4.91	3.62	4.1	4.39	385.75	193.77	114.68	105.83	181.46	90.72	104.5	100.21	253.93	137.59	107.21	100.57	3.62	5.03	8.1	7.28	125.8	52.59	95.52	103.55	283.27	109.66	111.68	104.42	24.08	12.02	101.46	101.33	6.25	6.67	93.98	93.99
678.065	5.07	3.48	4.09	4.43	381.21	192.81	114.43	105.8	178.66	88.64	104.2	100.39	251.11	136.33	107.1	100.45	3.9	4.79	8.14	7.31	124.8	50.99	95.62	103.36	278.85	108.12	111.51	104.17	24	12	101.38	101.01	5.93	6.29	93.77	93.97
678.393	5.13	4.2	4.14	4.37	375.07	189.47	114.29	105.61	177.08	87.56	104.03	99.74	246.99	133.83	106.6	100.2	4.36	4.41	8.15	7.39	123.14	50.75	95.8	103.31	274.07	106.52	111.12	104.1	24.14	11.9	101.35	101.02	5.69	6.05	93.69	93.71
678.72	7.57	7.38	3.99	4.36	369.89	189.41	114.05	105.57	176.08	89.74	104.01	99.93	247.01	134.69	106.49	100.38	7.52	8.91	8.2	7.37	127.08	52.65	95.79	103.3	272.93	108.02	110.98	104.03	26.58	15.32	101.27	101.2	9.37	9.29	93.84	93.7
679.047	3.91	3.98	4.13	4.37	361.31	185.01	114.02	105.83	171.2	85.52	104.18	100.3	240.73	131.57	106.74	100.47	4.96	4.59	8.28	7.43	124.36	48.67	95.97	103.26	265.57	103.58	111.2	104.19	23.26	11.24	101.59	101.13	5.87	6.33	93.94	93.94
679.374	4.43	3.9	4.15	4.35	358.69	182.89	113.55	105.46	168.46	84.5	103.81	100.05	238.35	130.97	106.45	100.15	4.68	4.95	8.34	7.49	123.92	48.91	96.19	103.04	264.05	102.46	110.56	103.93	22.86	11.68	101.35	101	6.09	6.75	93.89	93.81
679.702	4.71	4.7	4.04	4.36	352.31	179.01	113.26	105.07	167.1	83.54	103.77	99.81	233.07	126.81	106.05	100.14	4.8	5.43	8.35	7.61	123.06	48.39	96.17	103.02	256.91	100.76	110.51	103.68	23.3	11.74	101.34	100.81	6.75	6.51	93.68	93.76
680.029	4.99	4.4	4.06	4.38	347.15	177.91	113.18	105.3	165.1	82.5	103.84	99.85	231.09	126.03	105.82	100.11	4.02	5.41	8.38	7.55	123.74	48.77	96.36	103.02	255.81	101.12	110.48	103.84	21.96	11.74	101.29	101.19	6.71	5.95	93.73	93.78
680.356	4.59	3.48	4.11	4.36	341.37	174.65	113.14	105.27	161.52	81.36	103.8	100.18	226.85	124.61	105.91	99.94	4.54	4.51	8.41	7.64	122.1	47.11	96.63	103.08	250.59	98.24	110.38	103.91	22.36	11.04	101.16	101.32	6.49	6.73	93.87	93.79
680.683	5.07	3.8	4.04	4.39	335.95	172.05	113.02	105.32	159.12	80.22	103.85	99.98	222.81	123.09	105.88	100.12	4.48	4.97	8.49	7.74	121.76	46.77	96.71	102.96	246.59	97.24	110.3	103.86	23.06	11.64	101.44	101.1	7.01	6.11	93.89	93.88
681.01	4.27	3.56	4.09	4.37	331.09	170.11	112.67	105.23	157.06	78.96	103.81	99.92	219.99	121.45	105.83	100.01	4.16	5.15	8.57	7.7	121.72	46.07	96.77	102.71	241.63	95.9	110.17	103.66	22.44	10.6	101.36	101.26	6.03	6.45	94.01	93.85
681.336	6.17	4.74	3.97	4.26	328.61	168.35	112.82	105.19	155.84	79.14	103.85	99.97	218.13	121.09	105.72	100.01	4.78	5.61	8.51	7.71	123.26	47.13	96.95	103.02	240.01	96.36	110.06	103.47	21.98	12.64	101.47	101.17	6.87	6.07	93.95	93.83
681.663	5.13	4.06	4.09	4.36	322.51	165.13	112.68	105.11	152.98	77.18	103.81	100	213.39	119.35	105.62	99.98	4.96	5.05	8.61	7.79	119.62	45.45	97.24	102.96	235.15	93.4	109.81	103.75	21.86	11.5	101.51	101.24	6.47	6.61	94.05	94.11
681.99	4.63	2.9	4.1	4.37	315.03	163.29	112.02	104.66	150.4	77.44	103.21	99.69	209.27	116.15	105.07	99.72	3.3	4.15	8.66	7.81	121.38	44.89	96.96	102.68	231.93	92.62	109.39	103.26	20.78	10.58	101.32	101.02	5.75	5.89	93.85	93.71
682.317	4.47	4.6	4.12	4.47	311.79	159.83	112.08	105.04	149.62	76.36	103.45	99.82	206.11	114.21	105.23	99.69	3.96	4.17	8.75	7.91	120.36	43.93	97.32	102.64	229.37	91.4	109.37	103.42	21.58	11.06	101.29	101.13	5.49	5.93	94.03	94.06
682.643	4.29	4.08	4.13	4.39	307.75	159.45	111.67	104.92	148.08	74.86	103.16	99.8	204.19	115.55	105.11	99.92	4	4.73	8.82	7.92	120.26	42.91	97.47	102.75	225.77	90.16	109.16	103.38	21.88	10.52	101.26	101.3	6.65	5.89	93.99	93.92
682.97	4.95	4.18	4.09	4.28	303.91	157.77	111.45	104.68	147.04	74.92	103.06	99.5	202.69	112.43	104.72	99.68	4.1	4.53	8.79	7.98	121.04	43.95	97.77	102.46	223.67	89	108.88	103.24	21.42	10.74	101.19	101.17	6.05	5.71	93.84	93.62
683.297	4.45	4.12	4.12	4.39	298.43	154.59	111.5	104.83	144.54	72.64	103.31	99.61	197.97	110.69	104.87	99.73	4.74	5.45	8.83	8.1	119.98	43.17	97.95	102.75	218.77	87.76	109.24	103.51	20.98	11.32	101.33	101.29	6.47	5.53	93.8	93.97
683.623	4.85	5.08	4.06	4.33	294.81	153.51	111.28	104.68	143	73.68	103.1	99.76	197.19	109.59	104.85	99.56	5.28	5.97	8.88	8.05	118.76	42.71	98.22	102.43	217.15	88.14	109.08	103.23	21.04	11.18	101.55	101.18	6.77	5.95	93.91	93.84
683.95	4.45	3.64	4.12	4.32	289.85	151.93	111.05	104.49	140.8	72.56	102.88	99.61	193.25	109.31	104.4	99.5	4.94	5.39	8.97	8.07	119.74	42.73	98.23	102.43	213.05	85.5	108.61	103.04	21.14	11.24	101.16	100.98	6.91	6.05	93.84	93.81
684.276	4.99	3.88	4.09	4.35	288.21	149.07	110.82	104.61	138.98	70.82	102.95	99.66	190.75	106.81	104.44	99.38	3.7	4.43	9	8.16	119.54	41.73	98.34	102.53	210.31	84.7	108.68	103.03	19.74	11.28	101.24	100.99	5.81	6.09	93.73	93.86
684.603	4.35	3.94	4.07	4.33	282.39	146.43	110.65	104.4	136.04	70.9	102.82	99.46	188.11	105.57	104.32	99.32	4.6	5.53	9.02	8.18	119.14	40.77	98.28	102.18	207.53	83.38	108.35	102.98	20.46	11.02	101.35	100.98	6.17	6.23	93.71	93.76
684.929	5.63	4.98	4.04	4.31	277.07	145.07	110.62	104.36	134.56	68.52	102.87	99.38	184.99	104.73	103.97	99.54	5.1	5.37	9.02	8.16	117.96	41.73	98.58	102.22	204.05	83.08	108.43	102.7	20.14	11.46	101.2	101.07	7.01	5.91	93.97	93.76
685.255	5.17	4.48	4.03	4.29	272.57	144.21	110.39	104.34	132.94	68.8	102.74	99.69	182.27	102.79	104.36	99.4	4.6	4.61	9.08	8.23	116.6	39.57	98.7	102.14	201.27	82.18	108.32	102.84	18.84	10.8	101.16	101.16	6.03	5.31	93.68	93.89
685.582	11.21	10.28	4.09	4.39	273.33	146.71	110.48	104.16	137.34	72.08	102.91	99.44	184.57	108.63	104.11	99.27	11.3	11.23	9.15	8.25	123.22	46.99	98.97	102.32	202.93	86.88	108.22	102.82	26.02	16.62	101.1	101.12	13.11	12.75	94.01	93.8
685.908	5.47	3.7	4.13	4.38	267.73	140.97	110.28	104.46	130.24	67.16	103	99.73	177.21	100.61	104.06	99.33	4.06	5.27	9.25	8.36	116.4	39.29	99.04	102.41	196.33	80.48	108.2	102.79	18.78	10.82	101.25	101.08	6.25	6.19	93.96	94.04
686.234	4.87	4.16	4.07	4.35	262.23	135.75	110.06	104.31	127.84	65.6	102.69	99.7	173.71	99.43	104.3	99.5	4.3	4.61	9.29	8.37	115.68	39.23	99.25	102.31	191.03	78.48	107.88	102.88	18.94	9.88	101.22	100.99	6.01	6.01	93.95	93.84
686.56	4.61	3.7	4.08	4.38	254.53	134.99	109.91	103.98	126.62	64.36	102.55	99.54	171.75	97.85	103.84	99.38	5.02	5.09	9.34	8.4	115.32	38.25	99.4	102.13	188.97	77	107.71	102.81	19	10.66	101.07	100.85	5.51	5.03	93.88	94.04
686.886	4.31	4.54	4.1	4.42	252.17	132.83	109.72	104.11	123.72	63.94	102.55	99.47	169.57	97.59	103.76	99.04	4.48	4.47	9.37	8.52	114.8	37.59	99.43	102.23	186.79	76.38	107.67	102.78	18.7	9.5	101.19	101	5.73	5.61	93.75	93.75
687.212	4.87	5	4.1	4.33	250.21	132.79	109.44	103.82	123.32	63.34	102.53	99.35	168.73	96.73	103.62	99.15	4.66	5.27	9.32	8.49	114.36	36.67	99.62	102	184.69	75.98	107.52	102.74	18.9	11.1	101.24	100.79	6.25	5.81	93.89	94.08
687.538	4.85	4.76	4.05	4.32	245.51	129.73	109.5	104.05	120.32	62.4	102.55	99.59	163.23	95.15	103.65	99.23	4.6	5.11	9.41	8.54	113.22	36.85	99.87	102.24	182.15	74.44	107.55	102.87	19.14	10.98	101.4	101.22	5.73	6.07	94.12	94.08
687.864	4.09	3.82	4.09	4.4	242.55	128.43	109.15	103.64	119.5	61.5	102.39	99.31	162.85	93.43	103.13	98.98	4.88	5.47	9.44	8.51	113.76	37.19	100.02	101.78	178.21	72.6	107.31	102.63	18.74	9.54	101.14	100.85	5.99	5.47	93.82	93.82
688.19	4.93	4.22	4.1	4.37	237.75	127.29	109.29	103.84	118.74	62.36	102.58	99.47	160.25	92.09	103.44	99.01	4.88	4.99	9.43	8.69	112.66	36.79	100.41	102.11	175.31	72.86	107.41	102.76	17.58	10.38	101.31	101.31	5.65	5.87	93.75	94.07
688.516	4.57	4.28	3.98	4.36	236.51	126.07	109.29	103.89	117.58	60.3	102.46	99.42	158.17	91.79	103.3	98.94	4.96	5.29	9.51	8.57	113.26	35.95	100.5	101.81	173.31	72.3	107.1	102.51	18.02	9.84	101.19	100.88	5.77	6.57	93.76	93.91
688.842	4.61	4.08	4.06	4.33	232.23	123.69	108.98	103.8	114.9	59.12	102.16	99.37	155.29	90.63	103.4	98.97	4.9	4.33	9.52	8.72	110.76	35.25	100.43	101.87	171.15	71.46	107.09	102.54	17.66	9.04	101.27	100.94	5.53	5.97	93.93	93.77
689.167	5.03	3.92	4.03	4.38	226.47	122.43	109.08	103.76	112.66	57.64	102.24	99.54	153.43	88.95	103.2	99.08	3.8	5.19	9.59	8.72	110.68	34.53	100.79	101.82	168.37	70.22	107.09	102.56	17.64	9.26	101.27	100.93	5.23	5.43	93.93	94.01
689.493	4.95	4.16	3.99	4.36	224.47	120.55	108.67	103.49	111.86	57.02	102.24	99.33	150.93	87.77	102.9	98.96	4.8	4.57	9.57	8.71	110.9	35.03	100.77	102.01	165.55	70.62	106.93	102.24	17.5	9.04	101.03	100.98	6.27	5.87	93.73	94.02
689.819	3.43	3.02	4.06	4.39	220.67	118.63	108.54	103.8	110.8	56.42	102.25	99.25	149.07	85.47	102.72	98.83	4.14	5.25	9.67	8.84	110.06	34.49	100.8	101.96	163.33	68.56	106.79	102.45	16.9	8.38	101.34	100.88	5.65	6.03	93.96	94.11
690.144	3.63	2.58	4.05	4.32	215.47	116.45	108.64	103.62	109.32	56.32	102.17	99.27	145.43	86.25	102.77	99.01	4.6	5.07	9.7	8.78	109.02	33.89	101.05	101.8	161.41	67.96	106.98	102.41	16.78	9.62	101.02	101.01	5.67	5.03	93.67	94.04
690.47	4.15	3.52	4.04	4.31	214.61	114.83	108.38	103.33	107.48	55.64	102	99.25	146.19	83.89	102.61	98.75	3.72	4.91	9.7	8.85	109.02	33.05	101.28	101.82	160.11	67.68	106.49	102.25	16.72	8.82	101.03	101.21	5.83	5.83	93.96	93.88
690.795	4.69	3.8	4.03	4.28	211.03	114.17	108.47	103.3	105.92	54.72	102.09	99.33	143.43	83.57	102.59	98.75	4.74	4.33	9.76	8.88	109.94	33.29	101.32	101.81	156.97	67.02	106.73	102.4	17.76	9.16	101.27	100.98	6.03	5.83	93.98	93.88
691.121	4.25	3.54	4.05	4.34	210.47	113.25	108.15	103.27	104.74	53.54	102.09	99.16	141.43	83.17	102.46	98.72	3.88	3.59	9.75	8.87	107.7	32.83	101.32	101.66	155.37	65.72	106.34	102.25	16.46	8.82	101.05	101.02	4.99	5.19	93.79	93.91
691.446	4.83	3.68	4.04	4.39	206.51	111.05	108.11	103.28	103.84	53.72	102.12	99.32	138.49	81.99	102.55	98.72	4	4.69	9.83	9.02	108.78	31.83	101.53	101.49	152.87	64.52	106.51	102.18	16.74	9.32	101.17	100.86	5.11	5.79	93.78	94.01
691.772	4.83	4.44	4.09	4.34	204.85	109.81	108.05	103.17	102.8	53.02	102.01	99.37	136.81	81.59	102.51	98.74	5.08	5.43	9.9	9.04	105.74	32.11	101.86	101.45	150.55	64.52	106.36	102.25	16.72	9.6	101.06	100.92	5.13	6.07	93.87	94.04
692.097	4.45	4.1	4.1	4.35	199.29	107.65	107.87	103.43	101.92	52.82	102.03	99.34	135.23	78.81	102.36	98.55	4.82	4.35	9.91	9.1	105.14	31.35	101.79	101.58	148.01	63.04	106.3	102.21	15.88	9.78	101.03	100.92	5.21	4.93	93.81	93.96
692.422	3.29	3.74	4.07	4.41	196.55	107.05	107.84	102.92	100.46	51.14	102.05	99.28	132.61	78.13	102.05	98.71	4.6	4.49	9.99	9.15	105.98	31.13	102.06	101.31	146.01	62.52	105.88	101.92	16.04	9.86	101.29	100.65	5.73	5.57	93.84	93.96
692.747	5.29	4.18	4.03	4.32	193.87	105.33	107.87	103.35	97.02	50.56	102.13	99.37	130.85	76.73	102.34	99.08	4.68	5.25	9.92	9.22	105.84	31.31	102.47	101.63	142.95	62.36	106.2	102.18	16.02	10.04	101.29	101.17	5.89	4.97	94.18	94.16
693.072	4.19	3.7	4.04	4.36	190.07	104.15	107.42	103.15	97.22	49.94	101.89	99.12	130.09	77.83	102.31	98.72	4.58	4.97	9.96	9.12	104.1	30.13	102.55	101.43	141.67	60.92	106.06	102.08	16.02	9.62	101.17	101.14	5.65	4.99	94.08	93.99
693.398	4.59	4.22	4.04	4.35	191.67	103.55	107.56	103.14	96.02	49.32	102.1	99.51	128.55	75.81	102.12	98.67	4.8	4.75	10.05	9.25	103.5	30.57	102.81	101.44	139.85	60.48	106.19	102.07	15	8.7	101.33	101.22	4.81	4.97	94.11	94.07
693.723	4.53	3.52	4.07	4.31	186.89	102.27	107.31	103.13	94.12	48.46	101.76	99.21	126.27	74.53	102.08	98.52	5.4	4.77	10	9.21	102.6	29.09	102.61	101.35	139.57	59.42	105.97	101.91	14.88	7.94	101.04	101.1	5.69	5.45	93.81	93.91
694.048	4.87	4.18	4.02	4.3	183.45	99.17	107.33	103.07	92.68	47.38	101.69	99.12	124.65	74.67	102.04	98.75	4.42	4.65	10.04	9.25	102.74	29.41	102.88	101.43	135.41	57.66	105.91	101.82	15.74	8.92	101.16	100.86	5.69	4.57	93.84	93.96
694.373	5.35	4.78	4.05	4.33	182.05	99.03	107.06	103	92	49.08	101.78	99.25	124.53	74.13	101.98	98.47	5.8	5.13	10.17	9.3	103.02	30.29	102.74	101.48	135.83	59.6	105.68	101.93	16.24	9.96	101.13	100.8	6.93	5.77	93.86	93.9
694.698	5.03	4.16	4.03	4.38	179.51	97.83	107.22	103.06	91.88	47.36	101.74	99.19	122.07	73.43	101.81	98.29	5.72	6.35	10.1	9.26	102.12	30.03	103.06	101.31	132.51	57.7	105.58	101.94	15.54	9.38	101.1	100.94	6.69	6.29	94.07	93.87
695.022	4.23	4.4	4.02	4.25	176.93	95.31	106.51	102.72	89.86	46.18	101.36	98.88	119.75	71.97	101.3	98.06	3.5	4.49	10.13	9.43	100.7	28.53	102.82	100.9	130.29	56.6	105.14	101.64	14.56	8.12	100.67	100.78	6.01	4.91	93.48	93.75
695.347	4.57	4.26	4.09	4.35	175.43	95.21	107	102.97	88.44	45.62	101.56	99.14	119.15	72.29	101.85	98.44	4.86	4.33	10.29	9.48	100.54	28.27	103.29	101.28	129.13	56.58	105.44	101.95	14.44	8.08	100.99	101.14	5.31	5.03	93.8	94.05
695.672	5.19	3.78	4.07	4.28	172.05	95.13	107.08	103.02	87.6	44.72	101.73	99.18	117.07	70.95	101.95	98.63	4.44	5.35	10.27	9.56	99.58	28.59	103.58	101.39	127.93	55.72	105.45	101.95	14.98	8.54	101.11	101.07	5.43	4.75	94.1	94.01
695.997	4.95	4.44	4.08	4.35	169.19	93.63	106.85	102.83	86.82	44.18	101.51	99.12	116.31	69.25	101.67	98.24	4.82	5.03	10.28	9.42	98.96	28.57	103.47	101.09	124.71	54.86	104.95	101.82	14.2	8.54	100.9	100.88	5.41	6.37	93.87	93.92
696.321	4.39	3.56	3.99	4.25	165.41	91.89	106.59	102.47	85.46	43.86	101.55	99.18	113.99	68.23	101.31	98.21	3.66	4.75	10.23	9.47	96.86	27.79	103.8	100.99	124.65	53.76	105.27	101.7	13.82	8.24	100.78	100.92	5.35	4.73	93.62	93.81
696.646	4.17	4.1	4.04	4.3	164.51	90.41	106.6	102.57	83.92	43.1	101.5	99.22	112.49	67.35	101.29	98.22	3.84	5.49	10.19	9.54	97.42	26.45	103.96	101.03	122.99	54.6	105.08	101.63	14.6	8.06	101.12	100.91	5.55	6.05	93.75	93.98
696.971	4.37	3.16	4.02	4.28	163.17	88.73	106.63	102.87	82.54	43.32	101.52	99.12	110.15	66.75	101.6	98.42	4.92	4.17	10.21	9.56	96.98	26.77	104.09	101.19	120.51	52.3	105.14	101.56	14.1	8.36	101.24	101.26	5.67	5.25	93.98	94.07
697.295	4.33	4.92	4.06	4.38	161.29	88.89	106.65	102.87	82.6	42.68	101.63	99.24	110.45	65.85	101.43	98.4	5.1	5.31	10.36	9.72	95.62	27.31	104.25	101.11	120.29	53.48	105	101.83	14.12	8.9	101.16	101.18	5.99	6.07	93.9	93.92
697.62	4.31	4.78	4.04	4.32	160.03	88.11	106.41	102.64	81.68	42.06	101.46	98.93	109.01	66.47	101.31	98.12	4.68	5.65	10.28	9.53	96.38	26.89	104.33	101.09	117.73	52.3	105.14	101.43	13.86	9.54	101.11	100.82	7.03	5.41	93.96	93.95
697.944	4.75	4.54	4.07	4.34	158.37	88.03	106.4	102.51	80.58	41.24	101.39	98.96	108.25	64.19	101.31	98.16	5.08	5.27	10.34	9.69	95.3	25.59	104.4	101.05	117.73	51.14	104.95	101.69	14.02	8.34	100.94	100.83	6.05	5.13	94.01	93.83
698.269	5.23	3.5	4.05	4.29	153.89	86.27	106.42	102.75	77.92	39.88	101.45	98.99	103.77	64.27	101.17	98.19	5.16	4.99	10.35	9.65	94.72	25.39	104.78	101.16	115.37	51.46	105.02	101.73	13.8	7.98	101.21	101.08	6.01	5.19	94.1	94.01
698.593	5.55	4.48	4.06	4.3	154.01	83.87	105.96	102.17	78.12	40.56	101.07	98.63	104.43	63.27	100.77	97.63	5.48	5.15	10.37	9.66	95.28	25.01	104.35	100.65	113.23	50.92	104.55	101.29	13.9	8.56	100.68	100.71	6.45	5.71	93.53	93.79
698.917	4.27	3.92	4.1	4.32	150.41	82.53	106.26	102.46	76.88	39.3	101.13	98.99	103.09	61.53	101.14	98.1	4.02	4.97	10.5	9.79	93.82	24.65	104.69	101.05	110.91	49.8	104.85	101.59	13.24	7.58	101.12	100.88	5.03	4.93	93.8	93.67
699.242	4.71	4.22	4.02	4.35	149.77	82.67	105.95	102.25	77.4	38.76	101.09	98.84	101.05	61.49	100.77	97.93	4.68	5.11	10.44	9.76	92.34	25.27	104.55	100.78	110.61	48.82	104.64	101.14	13.06	7.9	100.63	100.84	5.75	5.17	93.63	93.86
699.566	3.75	4.02	4.01	4.16	147.25	81.29	106.06	102.5	74.8	39.26	101.43	98.91	101.87	60.15	101.03	98.13	3.68	4.29	10.42	9.81	92.14	24.35	105.15	101.23	109.53	47.74	104.78	101.4	12.54	7.68	101.15	100.88	5.39	5.19	94	93.94
699.89	4.71	4.22	4.01	4.35	145.49	80.89	105.74	102.53	74.4	38.2	101.05	99	100.05	60.67	101.06	98.3	4.38	5.35	10.5	9.78	91.18	25.05	105.2	100.87	107.39	48.06	104.4	101.44	13.28	8.28	101.1	100.81	6.27	5.51	93.88	93.82
700.214	3.95	4.32	4.01	4.4	142.53	80.41	105.64	102.28	72.64	37.8	100.86	98.89	98.21	59.15	100.62	97.96	3.06	3.59	10.55	9.74	90.98	24.07	105.13	100.8	106.53	47.76	104.41	101.35	13	7.7	100.85	100.84	4.55	5.05	93.72	93.71
700.538	5.03	3.98	4.02	4.31	139.85	78.09	105.73	102.43	72.1	36.74	101.12	98.99	96.71	59.19	100.71	97.85	4.14	4.29	10.57	9.82	89.92	23.39	105.22	100.74	105.79	46.38	104.47	101.54	13.02	7.84	100.96	100.61	5.09	5.59	93.67	93.84
700.862	4.41	5.12	3.99	4.3	139.35	79.39	105.68	102.33	72.2	37.62	100.96	98.93	97.39	59.09	100.56	97.95	4.62	5.77	10.59	9.77	89.96	23.59	105.5	100.8	104.53	47.46	104.44	101.57	13.4	8.32	100.99	100.91	5.77	5.53	93.69	93.95
701.186	5.43	4.38	4.06	4.33	137.77	76.17	105.73	102.41	70.18	36.3	101.12	99.05	94.81	56.59	100.62	97.87	5.28	5.21	10.64	9.92	88.16	23.75	105.68	100.99	102.13	45.8	104.5	101.36	13.2	8.34	101	101.04	4.99	5.15	94.11	94.08
701.51	4.89	4.22	4.05	4.38	137.13	77.45	105.38	102.28	69.68	35.28	100.81	98.62	94.27	56.25	100.53	97.58	4.98	4.63	10.66	9.83	88.82	22.83	105.37	100.52	100.49	45.38	104.09	100.95	13.1	8.98	100.6	100.76	5.83	5.27	93.59	93.45
701.834	4.63	3.98	4.05	4.36	134.33	75.21	105.42	102.18	69.58	35.36	100.92	98.82	92.01	55.31	100.53	97.86	3.96	4.71	10.61	9.89	88.12	23.35	105.62	100.59	100.55	44.04	104.4	101.39	12.72	7.4	100.98	100.85	4.95	4.77	93.84	93.76
702.158	3.95	3.7	3.99	4.29	132.01	73.13	105.17	102.13	69.14	34.4	100.87	98.58	91.45	55.37	100.42	97.79	4.84	4.11	10.67	9.87	86.82	22.39	105.78	100.59	98.47	44.66	104.04	101.2	12.18	7.66	101.09	100.85	4.87	5.03	93.66	93.87
702.481	5.31	5.2	4.06	4.32	132.45	74.23	105.38	102.46	68.8	36.04	101.14	98.83	92.21	56.93	100.43	98.08	5.56	5.83	10.69	9.98	87.4	23.93	105.96	100.97	99.73	44.28	104.4	101.3	12.86	7.44	101.12	101.07	6.79	5.79	93.96	94.15
702.805	5.09	4.22	4.07	4.32	129.03	72.69	105.46	102.53	65.98	33.2	101.02	98.89	89.91	53.97	100.72	98.13	4.36	4.51	10.74	9.91	86	21.67	106.14	100.83	95.73	43.64	104.41	101.3	11.96	6.98	101.18	101.17	5.33	5.23	94.07	94.14
703.129	4.45	3.62	4.06	4.43	128.19	72.07	105.22	102.31	65	32.86	100.72	98.84	88.61	53.27	100.63	97.79	5.2	3.69	10.81	9.96	85.34	21.43	106.09	100.89	96.11	42.2	104.12	101.11	11.46	7.56	100.99	101.04	5.39	4.75	93.94	93.98
703.452	4.05	3.6	3.99	4.22	125.93	70.35	105.03	101.98	64.96	33.24	100.67	98.61	87.45	53.11	100.23	97.63	4.34	5.23	10.63	9.99	85.1	21.81	106.01	100.67	93.77	43.06	103.93	101.01	11.68	7.1	100.88	100.63	4.61	5.15	93.79	93.59
703.776	4.85	4.22	4.08	4.41	125.45	70.67	105.02	102.03	64.46	33.04	100.73	98.58	86.45	53.37	100.19	97.66	4.56	4.15	10.73	9.99	84.5	21.37	106.19	100.52	94.01	42.06	103.84	100.99	11.46	8.2	100.84	100.74	6.15	5.19	94.01	93.79
704.1	4.21	4.96	4.08	4.37	123.67	70.13	105.04	101.94	63.9	32.74	100.81	98.89	86.39	52.25	100.29	97.83	4.32	5.53	10.86	10.06	83.38	21.93	106.57	100.76	92.63	41.36	104	101.28	12.56	8.26	101.12	101.01	4.83	5.87	94.06	94.07
704.423	3.85	3.64	3.97	4.35	123.11	69.65	104.92	102.06	62.42	32	100.6	98.5	84.17	51.13	100.17	97.44	4.28	4.71	10.8	9.95	81.68	21.35	106.39	100.33	92.01	41.2	103.84	100.93	10.5	6.88	100.94	100.61	5.05	5.21	93.81	93.79
704.747	4.27	3.04	4.02	4.38	120.17	67.59	105.05	102.39	62.46	31.14	100.96	98.72	83.21	49.83	100.44	97.91	4.7	4.55	10.82	10.1	80.5	20.63	106.85	100.86	88.89	39.88	104.21	101.38	12	7.44	101.14	101.13	5.11	5.09	94.18	93.99
705.07	4.19	4.02	4.02	4.38	119.41	67.39	104.69	102.25	60.44	30.7	100.67	98.84	82.55	49.31	100.26	97.67	4.48	4.79	10.88	9.99	80.44	19.89	106.71	100.41	87.65	39.4	103.85	101.22	11.36	7.6	100.8	100.96	5.47	4.81	93.75	93.96
705.393	4.51	3.86	4.01	4.32	116.87	66.33	104.75	101.87	59.82	30.22	100.48	98.66	81.47	49.09	99.97	97.59	4.04	4.37	10.91	10.01	79.78	19.91	106.6	100.47	87.37	39.32	103.86	100.94	11.46	6.84	100.97	101.05	4.13	4.19	93.92	93.87
705.717	4.41	4.36	4.17	4.41	116.11	66.47	104.82	101.89	60.58	30.42	101.07	98.84	80.77	48.75	100.08	97.78	4.44	5.05	10.82	10.09	79.44	20.87	106.8	100.42	86.55	38.98	103.78	100.93	11.94	7.78	101.16	100.79	5.39	5.91	93.82	94.21
706.04	4.79	5.04	4.11	4.45	115.43	66.19	104.96	102.09	58.94	29.1	100.78	98.93	79.35	48.89	100.17	98.14	4.94	4.99	10.93	10.07	80.32	20.27	107.12	100.57	85.37	38.88	103.89	101.32	12.08	8.14	100.93	101.12	5.11	5.43	94.06	94.12
706.363	4.09	3.86	4	4.45	114.29	63.49	104.5	101.7	58.32	29.82	100.49	98.54	78.83	47.07	99.88	97.25	4.48	4.45	10.78	10.03	79.24	19.53	106.94	100.35	84.67	38.46	103.62	101.09	11.12	6.84	100.72	100.7	5.07	5.07	93.78	93.75
706.686	6.67	6.3	4.13	4.41	114.85	64.85	104.63	102.15	58.8	30.24	100.72	99.11	80.19	49.21	100.38	97.9	7.4	6.31	10.93	10.07	79.56	21.85	107.07	100.42	85.21	40.54	103.75	101.09	11.98	8.44	100.96	101.31	6.41	6.79	94.03	94.06
707.009	4.71	4.08	4.09	4.37	112.97	64.13	104.85	102.07	56.94	29.14	100.71	98.78	77.93	46.87	99.92	97.67	4.68	5.17	10.92	10.16	77.16	19.79	107.08	100.42	83.81	38.42	103.65	101.08	11.1	7.08	101.05	100.82	5.59	6.03	93.89	94.13
707.332	4.91	4.48	4.13	4.4	111.05	62.81	104.36	101.71	56.52	28.72	100.3	98.67	76.73	47.01	99.8	97.46	5.04	4.55	10.96	10.09	76.82	18.99	106.89	100.28	81.31	37.48	103.41	100.94	11.34	7.5	100.76	100.97	6.15	5.59	93.84	93.86
707.655	5.27	5.12	4.09	4.43	111.03	63.65	104.36	101.85	56.96	30.14	100.51	98.77	77.61	47.75	99.76	97.57	6.26	6.15	11.01	10.08	78.12	21.07	107.31	100.45	82.75	38.98	103.44	100.98	11.88	9.22	100.82	100.9	7.25	6.77	93.97	93.85
707.978	4.85	3.92	4.18	4.37	107.75	61.45	104.68	101.81	55.54	28.5	100.75	98.87	76.17	45.89	99.91	97.8	4.16	4.89	11.05	10.14	75.78	18.67	107.13	100.81	80.49	36.74	103.62	101.37	10.74	7.84	101.1	101.29	5.07	5.65	94.25	93.94
708.301	7.13	6.46	4.03	4.41	109.59	63.81	104.42	101.92	57.56	31.82	100.44	98.49	77.05	48.59	99.82	97.6	6.8	7.81	11.05	10.12	77.76	21.75	107.16	100.23	83.05	38.48	103.44	100.97	13.88	9.84	100.86	100.89	8.05	7.81	93.93	93.91
708.624	5.39	4.1	4.1	4.49	105.87	60.31	104.2	101.69	55.68	28.86	100.59	98.79	75.13	45.33	99.76	97.63	3.92	5.65	11.02	10.11	76.36	19.99	107.32	100.45	80.79	37.9	103.58	100.86	11.32	8	101.09	100.82	6.27	5.73	93.69	94.2
708.947	6.07	5.4	4.15	4.45	105.71	61.47	104.14	101.7	54.74	29.06	100.49	98.67	73.81	45.87	99.57	97.25	6.08	5.87	11.04	10.11	76.38	19.69	107.18	100.24	79.51	36.68	103.03	100.83	12.18	8.48	100.7	100.88	6.51	5.85	93.88	93.9
709.27	4.75	4.46	4.16	4.44	104.07	58.51	104.41	101.76	52.5	26.58	100.63	98.75	72.81	42.69	99.88	97.67	4.8	4.13	11.12	10.12	74.14	18.03	107.82	100.33	77.91	35.34	103.46	100.94	10.86	6.94	101.09	101.12	4.67	4.81	93.91	93.95
709.592	4.99	4.1	4.14	4.46	100.57	57.81	104.22	101.62	51.26	26.3	100.73	98.82	70.57	42.51	99.8	97.31	5.26	4.29	10.96	10.29	71.72	17.33	107.87	100.22	76.17	33.8	103.32	100.92	10.1	7.12	100.91	101.08	5.45	4.49	93.94	94.04
709.915	4.61	5.02	4.09	4.51	101.43	57.93	103.87	101.36	51.68	26.86	100.19	98.44	70.03	42.27	99.61	97.29	4.92	4.71	10.98	10.11	73.12	17.87	107.46	100.03	75.81	34.06	103.11	100.48	10.26	6.5	100.8	100.77	4.93	4.91	93.82	93.72
710.238	4.47	4.16	4.16	4.5	99.59	55.63	104.16	101.48	49.84	26.22	100.51	98.65	69.53	41.47	99.95	97.69	4.8	4.37	11.06	10.14	72.62	16.51	107.8	100.48	74.61	34.04	103.15	100.9	10.14	7.24	101.14	100.93	4.97	4.81	93.69	93.85
710.56	4.87	4.3	4.05	4.41	100.37	57.05	103.81	101.71	51.6	25.14	100.33	98.54	68.51	42.59	99.69	97.45	4.94	4.85	10.88	10.02	71.98	18.03	107.68	100.18	75.51	34.24	102.79	100.63	10.58	7.14	100.77	100.83	5.31	5.11	93.83	93.81
710.883	5.09	5.5	4.14	4.43	99.53	57.67	104.09	101.69	50.62	27.06	100.12	98.61	70.25	42.21	99.37	97.33	6.38	6.51	11.05	10.14	72.34	18.73	107.67	100.24	74.25	35.14	103.06	100.77	11.3	7.58	100.77	100.99	6.21	7.03	93.83	93.97
711.205	4.53	4.42	4.1	4.46	97.79	55.13	103.71	101.55	48.3	24.3	100.46	98.79	67.63	40.11	99.39	97.24	4.98	4.25	10.98	10.06	70.94	17.19	107.72	100.07	71.93	33.36	102.99	100.83	9.96	6.6	100.92	100.75	5.17	4.73	93.78	93.86
711.528	4.73	4.72	4.13	4.46	96.27	55.93	103.76	101.43	48.8	25.26	100.11	98.39	67.79	40.39	99.45	97.45	4.86	5.23	10.99	10.08	69.68	17.73	107.75	100.31	73.45	33.28	103	100.71	10.38	7.38	100.78	100.88	6.33	5.17	93.92	93.76
711.85	4.75	3.32	4.09	4.41	92.83	53.75	103.69	101.4	47.14	23.7	99.8	98.35	65.43	40.09	99.24	96.94	4.44	4.33	11.07	10.09	69.7	17.17	107.73	99.85	69.35	31.68	102.8	100.38	9.68	7	100.61	100.64	5.61	5.09	93.64	93.52
712.172	4.43	3.82	4.11	4.48	93.23	53.51	103.79	101.5	46.28	24.74	100.29	98.53	64.39	39.13	99.17	97.48	4.48	4.35	11.13	10.06	68.68	17.01	108.02	100.29	70.55	31.82	103.18	100.78	8.88	6.72	101	101.08	5.79	5.73	94.1	93.88
712.495	4.09	4.04	4.18	4.46	92.51	52.89	104.02	101.76	46.96	24.34	100.43	98.49	64.83	39.01	99.41	97.33	4.6	4.91	11.17	10.03	67.86	16.97	107.9	100.2	69.23	31.1	103.12	100.94	10.02	6.04	101.14	100.83	4.71	5.63	93.91	93.82
712.817	3.75	3	4.14	4.57	92.59	52.45	104.22	102.01	45.82	24.04	100.51	98.79	64.33	38.75	99.75	97.75	4	3.99	11.17	10.1	67.2	16.63	108.39	100.51	69.05	30.9	103.24	100.93	9.54	6.86	101.3	101.48	5.25	4.31	94.32	94.16
713.139	4.95	3.78	4.22	4.49	90.41	51.49	103.92	101.49	45.54	23.28	100.39	98.67	63.85	38.27	99.23	97.25	3.44	3.75	11.07	10.07	67.66	15.71	107.95	100.3	67.99	31.46	102.83	100.69	9.52	5.98	100.95	101.09	4.79	4.57	93.65	93.85
713.461	5.09	3.56	4.26	4.62	90.61	50.95	103.58	101.6	45.24	23.02	100.2	98.61	63.41	37.79	99.16	97.14	4.02	4.01	11.13	10.17	66.76	16.83	107.84	99.99	68.05	30.92	102.8	100.69	9.64	6.36	100.8	100.89	4.57	4.75	93.98	93.68
713.783	5.01	4.8	4.27	4.61	88.59	49.55	103.6	101.49	45.88	23.1	100.18	98.6	63.09	37.41	99.28	97.33	4.94	5.35	11.21	10.09	65.98	16.37	107.96	99.78	67.21	30.28	102.92	100.52	10.14	7.02	101.06	100.84	5.15	5.23	93.94	93.92
714.105	4.29	4.48	4.32	4.64	86.19	51.03	103.31	101.45	43.86	22.86	99.97	98.54	61.13	36.91	99.3	97.12	3.74	5.37	11.19	10.11	66.46	15.65	108	100.03	66.77	29.12	102.7	100.53	9.32	6.42	100.77	100.86	5.07	5.03	94.05	93.99
714.427	4.07	3.3	4.22	4.55	87.15	49.87	103.53	101.41	43.26	22.22	100.23	98.49	60.77	36.43	99.01	97.13	3.66	5.29	11.11	9.96	65.58	15.91	107.79	100.19	65.27	29.46	102.92	100.42	9.54	6.48	100.9	100.92	4.85	4.05	93.78	93.92
714.749	4.05	3.84	4.2	4.5	85.63	48.99	103.3	101.33	43.6	21.96	100.27	98.86	60.65	35.89	99.06	97.23	4.24	4.01	11.08	10.03	64.44	15.57	108.07	100.18	64.57	29.98	102.89	100.5	9.92	6.96	101.17	100.78	5.25	4.81	94.1	94.1
715.071	4.29	3.72	4.32	4.59	85.59	49.27	103.95	101.59	42.34	21.82	100.67	98.74	60.03	35.15	99.47	97.55	4.84	4.45	11.17	10	63.34	15.61	108.37	100.4	63.53	29.5	102.85	100.71	8.94	7.04	101.17	101.15	4.51	4.91	93.88	94.09
715.393	5.03	4.46	4.15	4.55	85.01	49.77	103.44	101.57	43.84	22.94	100.05	98.83	60.99	36.45	99.2	97.33	4.62	5.45	10.99	10.03	64.42	16.03	108.22	100.23	64.87	30.56	102.64	100.45	10.9	7.26	100.98	101.22	5.39	5.59	93.96	94.07
715.715	3.69	3.22	4.27	4.52	83.15	47.01	103.18	101.04	41.5	21.24	100.08	98.57	57.35	35.37	98.83	97.11	3.56	4.11	11.1	9.87	62.52	15.03	108.03	99.75	62.15	28.14	102.62	100.51	8.84	5.24	100.91	100.87	5.01	4.97	93.75	93.81
716.036	4.45	4.42	4.25	4.5	82.73	47.73	103.15	101.34	40.82	21.28	100.04	98.42	57.01	35.25	98.9	97.21	4.08	4.19	11.03	9.87	62.66	15.07	108.13	99.89	63.07	29.92	102.53	100.37	9.4	6.18	100.62	100.94	6.05	5.65	93.73	93.71
716.358	4.47	3.46	4.38	4.55	82.49	46.85	103.84	101.79	40.58	20.72	100.59	98.81	57.43	34.55	99.13	97.55	4.06	4.09	11.12	9.86	63.62	15.01	108.51	100.42	61.85	28.62	102.87	101.02	9.02	6.24	101.29	101.37	5.09	5.49	94.24	94.24
716.68	4.57	4.08	4.29	4.59	81.35	47.23	103.35	101.55	39.64	21.64	100.22	98.62	57.79	33.43	98.71	97.25	4.34	4.53	11.08	9.99	61.64	15.23	108.24	100.19	61.87	28.2	102.7	100.58	8.5	6.46	101.21	100.84	4.55	3.95	94.01	93.82
717.001	5.33	4.62	4.26	4.51	81.23	46.51	103.2	101.18	40.2	21.04	99.78	98.5	56.31	34.31	98.86	97.06	5.26	5.05	11.05	9.93	61.34	15.53	107.94	99.84	59.99	28.06	102.48	100.48	9.96	7.26	100.62	100.71	5.15	5.93	93.79	93.71
717.323	4.53	3.74	4.29	4.59	79.35	46.23	103.3	101.52	38.92	21.38	100.15	98.73	55.95	33.51	98.87	97.33	3.92	4.83	11.16	9.94	59.4	14.31	108.38	100	60.77	27.4	102.6	100.56	9.06	6.18	101.13	101.18	5.61	4.63	94.04	93.97
717.644	4.31	4.18	4.44	4.68	78.73	45.45	103.45	101.28	39.34	19.98	100.15	98.7	55.29	33.05	99.41	97.33	4.86	4.17	11.16	9.83	60.26	13.95	108.49	99.93	59.45	26.62	102.62	100.81	9.36	5.48	101.18	100.92	4.51	4.89	94.05	94.14
717.966	4.75	3.46	4.32	4.66	78.11	45.25	103.09	101.04	38.78	20.46	99.88	98.54	55.15	34.01	99.05	97.26	4.48	4.91	11.08	9.96	59.7	14.01	108.05	99.94	59.03	26.44	102.4	100.68	8.96	6.34	100.83	100.91	4.53	4.21	94.01	94.01
718.287	3.77	4.36	4.37	4.66	75.89	43.79	103.28	101.34	38.66	19.64	100.26	98.69	53.27	31.99	99.07	97.36	3.18	5.03	11.17	9.87	57.54	13.79	108.11	100.16	57.27	26.12	102.31	100.46	9.12	5.86	100.84	101.23	4.31	3.39	94.06	94.04
718.609	4.35	3.62	4.4	4.74	76.27	45.75	103.17	101.41	37.36	20.1	100.28	98.51	53.03	31.39	99.05	97.41	5.1	4.61	11.03	9.96	58.28	15.17	108.39	100.01	57.41	25.8	102.59	100.47	8.8	6.2	101.08	101.02	4.81	4.25	93.87	93.86
718.93	4.81	4.32	4.4	4.63	76.49	43.81	103.08	101.11	36.96	19.74	99.9	98.49	53.21	30.51	98.77	97.11	4.78	5.11	11.13	9.84	58.06	13.31	108.03	99.95	56.85	24.42	102.29	100.34	8.98	6.58	101.19	101.1	4.57	4.31	93.87	93.95
719.251	3.15	4.38	4.37	4.59	74.85	42.91	103.04	101.06	37.16	18.88	99.69	98.65	52.23	31.01	98.71	96.74	4.02	4.41	11.21	9.79	56.98	13.11	108.35	99.92	56.59	25.56	102.22	100.28	9.26	5.94	100.95	100.97	4.67	4.97	93.7	93.73
719.572	6.49	5.28	4.33	4.61	76.41	45.09	102.85	101.3	37.44	21.78	99.71	98.6	52.73	32.63	98.72	97.19	5.58	6.69	11.15	9.78	59.04	16.07	108.46	100.13	57.55	27.5	102.55	100.49	10.26	8.32	101.08	101.06	6.79	6.43	93.86	94.18
719.893	4.41	3.68	4.26	4.63	72.97	41.69	102.95	101.03	35.88	19.32	100	98.52	51.03	30.67	98.93	97.27	4.2	4.45	11.09	9.79	57.02	13.53	108.32	99.75	55.49	25.5	102.31	100.37	8.64	6.18	101.05	101.01	5.59	4.97	93.92	93.78
720.215	4.33	3.74	4.24	4.56	70.87	42.37	102.77	101.16	34.74	18.32	100	98.41	49.99	30.55	98.39	96.8	3.64	4.61	11.03	9.68	55.32	14.25	108.07	99.89	55.13	24.72	102.14	100.35	8.82	5.9	100.97	100.85	4.55	4.49	93.7	93.78
720.536	3.83	3.22	4.24	4.6	72.07	41.15	102.79	100.98	35.48	18.74	99.95	98.53	49.63	29.79	98.59	97.03	3.58	4.47	11.06	9.76	55.6	14.17	108.1	99.94	54.25	25.62	102.14	100.48	8.68	5.48	100.85	100.91	4.69	3.55	93.76	93.78
720.857	4.25	3.76	4.41	4.64	71.45	40.51	102.87	101.14	35.38	17.22	99.74	98.49	50.17	29.87	98.58	97.1	3.82	5.03	11.08	9.79	54.76	13.81	108.23	99.66	53.25	24.74	101.96	100.47	8.78	6.26	101.23	101.05	5.03	5.87	94.07	93.79
721.178	3.75	3.64	4.43	4.71	69.87	39.69	102.73	101.09	33.54	18.58	99.8	98.57	48.57	29.03	98.52	97.11	4.18	4.23	11.03	9.73	53.36	13.67	108.2	99.7	52.63	24.04	101.96	100.35	8.88	5.38	100.93	100.94	4.95	4.55	93.95	93.93
721.499	4.03	3.8	4.55	4.79	69.89	39.79	102.62	100.95	33.72	18.46	100.03	98.61	48.03	29.05	98.31	97.05	3.9	3.93	11.16	9.86	53.9	12.69	108.09	99.58	51.87	23.5	102.06	99.97	7.74	5.22	100.84	100.9	4.77	4.81	93.69	94.01
721.819	3.75	3.8	4.33	4.7	68.61	39.63	102.31	100.92	33.54	19.1	99.76	98.36	46.69	28.35	98.27	96.89	4.02	4.67	11.12	9.66	53.76	13.55	108.03	99.56	52.09	24.38	101.85	100.29	7.62	5.54	100.72	100.9	4.27	5.47	93.89	93.76
722.14	5.17	4.54	4.43	4.7	68.83	40.17	102.37	100.93	34.86	19.14	99.84	98.55	47.23	29.65	98.34	96.73	4.38	5.25	11.09	9.69	54.34	14.19	107.97	99.83	52.99	25.12	101.81	100.1	9.82	6.52	100.65	100.89	4.79	6.37	93.65	94.03
722.461	4.79	4.06	4.32	4.66	67.65	39.23	102.59	101.09	33.08	17.82	99.77	98.71	46.71	28.89	98.7	97.17	4.1	5.29	11.16	9.85	53.56	13.59	108.37	99.82	50.85	23.34	101.97	100.53	8.48	6.84	101.11	101.21	4.69	5.19	94.08	93.85
722.782	4.21	4.36	4.48	4.75	65.57	38.65	103.18	101.49	32.88	17.76	100.07	98.88	47.39	27.71	98.63	97.28	5.44	4.91	11.25	9.75	52.36	12.25	108.7	100.09	50.31	23.42	102.2	100.49	8.38	5.7	101.25	101.41	5.07	4.47	94.14	94.26
723.102	3.75	4.28	4.51	4.87	66.51	38.35	102.81	101.15	32.86	17.1	100	98.66	46.53	26.73	98.73	97.23	4.62	4.63	11.12	9.8	51.38	13.05	108.13	99.93	50.13	23.4	102.32	100.79	8.16	6.52	101.18	101.29	4.77	3.99	94.23	94.24
723.423	4.15	3.66	4.56	4.86	66.39	37.19	102.48	101.13	32.44	17.42	99.88	98.74	45.31	27.47	98.55	97.27	3.22	3.87	11.23	9.79	51.48	12.29	108.25	99.73	48.93	22.54	102.18	100.51	7.94	6.22	101.04	101.41	4.11	3.49	94.27	93.99
723.744	4.99	4.64	4.42	4.81	64.75	36.75	102.53	101	31.76	18.04	99.82	98.65	44.63	27.25	98.43	96.98	4.44	4.69	11.12	9.76	50.5	12.87	107.93	99.95	48.73	22.88	102.24	100.42	7.84	7.08	101.1	101.04	5.09	5.11	94.07	94.18
724.064	4.17	4.24	4.49	4.7	63.81	36.51	102.33	101.02	30.92	15.86	99.92	98.48	44.23	26.57	98.46	96.95	4.4	3.79	11.21	9.95	50.1	12.33	107.88	99.71	48.67	21.78	101.86	99.83	8	5.72	101.09	100.97	4.75	4.01	94.11	94.06
724.385	5.25	5.22	4.46	4.76	64.43	37.97	102.17	101.27	31.9	17.26	99.75	98.64	45.99	27.67	98.38	96.86	5.66	5.51	11.16	9.77	52.02	12.59	107.83	99.8	48.95	24.36	101.87	100.39	9.14	6.38	100.64	100.94	6.05	6.35	93.93	93.99
724.705	4.55	3.88	4.47	4.71	63.49	36.69	102.55	101.12	30.56	16.52	99.72	98.47	43.61	26.95	98.55	96.91	5.34	4.09	11.07	9.69	50.42	12.45	108.33	99.54	47.87	22.08	101.97	100.35	7.52	5.5	101.04	101.01	5.57	4.19	94.1	94.06
725.025	4.75	4.28	4.48	4.74	61.79	36.45	102.6	101.03	30.42	16.36	99.81	98.39	42.97	25.97	98.19	97.01	4.64	4.47	11.23	9.86	49.76	13.81	108.07	99.69	47.25	22.98	101.76	100.4	8.68	6.44	101.17	101.01	5.27	4.77	93.91	93.98
725.346	4.59	3.84	4.58	4.77	61.27	35.25	102.47	101.14	30.14	16.4	99.69	98.72	41.67	25.27	98.34	97.03	3.6	4.03	11.14	9.81	48.42	11.93	108.13	99.6	46.23	20.82	102.12	100.42	8.32	6.24	101.14	101.17	4.83	4.75	94.34	94.13
725.666	4.23	4.42	4.59	4.8	60.71	35.79	101.97	100.82	29.24	16.22	99.87	98.44	42.13	26.23	98.14	96.6	3.84	5.35	11.21	9.75	48.96	12.03	107.64	99.4	45.21	21.6	101.62	100.23	8.04	5.72	100.76	100.9	5.81	5.15	93.77	93.72
725.986	4.39	2.88	4.56	4.78	60.51	35.47	101.98	101.03	29.16	15.68	99.52	98.49	41.85	25.69	98.09	96.74	3.34	4.35	11.21	9.66	47.5	11.31	107.6	99.61	45.03	20.92	101.68	100.1	7.54	5.32	100.56	101.07	5.51	4.65	94.07	93.56
726.306	4.13	4.06	4.55	4.8	59.91	35.29	102.51	100.95	29.02	15.46	100	98.76	41.45	25.37	98.3	97.1	3.8	4.35	11.31	9.85	47.38	11.49	107.72	99.69	45.15	21.62	101.83	100.16	7.4	5.78	101.19	100.99	4.25	4.01	94.24	94.08
726.627	4.05	4.16	4.52	4.81	58.23	33.93	102.25	101.02	29.3	15.9	99.81	98.59	40.29	25.07	98.25	96.92	4.28	3.15	11.38	9.79	46.76	10.93	108	99.54	45.13	21.64	102.03	100.26	8.1	6.34	101.03	101.22	4.69	4.27	93.97	93.95
726.947	4.49	5.24	4.61	4.94	59.83	34.75	102.2	100.91	28.86	15.9	99.8	98.67	40.99	26.15	98.14	96.93	4.84	4.73	11.41	9.87	47.84	11.95	107.86	99.84	44.71	20.88	101.76	100.44	8.5	6.86	101.15	101.04	4.95	5.57	94.07	94.21
727.267	4.15	4.86	4.54	4.89	58.01	33.75	101.95	100.81	29.14	15.56	99.98	98.48	40.05	24.47	98.23	96.86	4.2	4.73	11.34	9.89	46.46	12.19	107.72	99.49	44.21	20.36	101.61	100.39	7.76	6.18	100.9	101.04	4.33	4.57	94.13	94.1
727.587	4.21	3.32	4.65	4.88	55.63	33.61	101.82	100.55	27.56	14.62	99.41	98.43	39.57	23.97	98.21	96.51	3.98	4.03	11.27	9.92	45.5	10.97	107.42	99.58	42.67	20.36	101.39	99.82	7.5	5.5	100.85	101.04	4.63	4.69	93.92	93.7
727.907	4.33	4.18	4.59	4.94	57.53	32.55	102	101.12	27.86	16.44	99.63	98.45	39.37	23.83	97.98	97.01	4.64	5.21	11.36	10.01	45.72	12.17	107.83	99.64	43.27	20.48	101.69	100.29	7.68	6.6	101.05	101.22	5.61	5.39	94.1	94.05
728.226	4.81	4.7	4.53	4.99	56.77	32.83	101.94	100.75	28.1	14.96	99.4	98.38	38.89	23.69	97.72	96.53	5.42	3.99	11.41	9.85	45.5	11.59	107.08	99.46	42.21	20.14	101.24	99.9	7.88	5.3	100.83	100.89	4.85	4.67	93.84	93.85
728.546	4.01	4.18	4.7	4.98	55.07	32.25	101.9	100.49	28.42	15.04	99.36	98.28	37.77	23.37	97.68	96.55	3.94	4.73	11.37	10	44.1	11.35	107.31	99.73	41.35	18.14	101.25	100.13	7.28	5.4	100.79	100.76	4.55	4.41	93.94	93.8
728.866	4.95	4.2	4.68	4.97	55.37	32.87	101.84	100.7	27.4	15.28	99.63	98.33	38.33	23.57	97.93	96.64	5.76	5.13	11.45	10.06	45.66	11.13	107.19	99.45	40.11	20.26	101.69	100.19	8.24	5.68	100.84	101.14	5.51	5.41	93.88	94.12
729.186	4.33	3.8	4.57	4.91	53.97	32.07	102	100.69	26.4	14.82	99.57	98.34	36.93	23.69	97.9	96.56	4.34	3.41	11.46	9.88	43.3	11.03	107.4	99.52	41.13	19.38	101.45	100.16	7.88	5	100.73	101.17	5.01	4.29	94.16	93.95
729.505	4.81	4.08	4.62	4.88	52.71	31.07	101.67	100.47	25.98	15.3	99.52	98.48	36.75	23.09	97.8	96.96	3.6	4.81	11.39	9.97	43.52	10.51	107.08	99.4	39.73	19.3	101.45	100.04	6.9	5.96	100.96	100.69	4.75	3.53	94.07	93.83
729.825	7.43	6.02	4.76	4.91	55.13	33.35	101.62	100.43	29.24	17.38	99.44	98.39	38.51	26.15	97.75	96.7	6.88	6.91	11.54	9.97	46.48	14.15	106.88	99.36	42.51	22.44	101.33	100.03	11.04	8.62	100.99	101	8.09	8.19	93.9	94
730.145	4.39	3.56	4.68	4.99	53.37	31.35	101.96	100.75	26.08	15	99.62	98.42	36.31	22.49	97.95	96.8	3.3	4.21	11.53	9.99	43.64	10.73	107.02	99.75	39.93	19.46	101.38	100.04	7.4	6.22	101.22	101.37	5.41	4.81	93.96	94.13
730.464	4.37	3.26	4.77	4.99	51.61	30.29	101.83	100.54	25.54	14.2	99.68	98.56	35.75	22.35	97.71	96.83	3.82	3.47	11.62	9.92	42.56	11.21	107.1	99.57	39.13	19.62	101.21	99.87	7.96	5.38	101.05	101.12	5.09	4.37	93.96	94.02
730.784	4.47	4.34	4.62	4.98	51.29	30.13	101.66	100.81	25.26	14.46	99.44	98.24	35.09	21.81	97.7	96.53	3.66	4.19	11.62	9.93	41.78	10.93	106.95	99.26	38.63	18.7	101.13	99.54	7.66	4.3	100.83	101.13	4.05	6.05	93.96	94.01
731.103	3.53	3.48	4.74	5.05	50.45	29.93	101.42	100.64	24.6	13.28	99.52	98.38	34.83	21.07	97.57	96.61	2.98	3.59	11.69	9.99	41.7	10.19	106.98	99.39	38.03	17.56	101.19	99.92	6.8	4.48	100.73	100.94	5.31	4.31	94.01	94.01
731.423	4.05	4.4	4.82	5.05	49.39	29.13	101.44	100.47	24.74	13.64	99.37	98.45	35.39	21.25	97.45	96.46	4.48	4.31	11.83	10.24	41.6	10.45	106.75	99.36	37.73	16.96	101.33	99.77	6.84	4.6	100.76	101.07	4.57	4.15	94.04	93.84
731.742	4.59	4.2	4.88	5.06	49.79	29.73	101.27	100.48	25.56	14.46	99.35	98.23	35.29	21.87	97.75	96.46	4.98	4.97	11.76	10.17	41.98	10.79	106.55	99.26	37.77	18.4	101.09	99.74	6.98	6.02	100.56	100.91	5.43	4.53	93.85	93.77
732.061	3.85	3.42	4.82	5.09	48.25	28.53	101.32	100.57	24.78	13.5	99.42	98.34	34.07	20.99	97.75	96.48	4.34	3.69	11.78	10.34	41.26	10.99	106.91	99.54	36.43	18.6	101.13	99.82	7.3	4.98	101.05	101.1	5.01	3.87	93.98	94
732.381	3.89	3.38	4.92	5.23	47.47	28.25	101.68	100.54	23.76	14.32	99.44	98.61	33.25	20.11	97.85	96.78	3.5	4.11	11.86	10.32	39.64	9.13	106.98	99.71	35.27	17.58	101.16	99.62	7	5.76	101.11	101.28	4.39	4.55	94.31	94.07
732.7	4.51	4.76	4.84	5.18	49.53	28.51	101.35	100.45	24.52	14.28	99.23	98.27	33.95	20.39	97.54	96.5	3.94	4.75	11.97	10.27	40.7	9.63	106.66	99.24	36.07	17.24	101.05	99.69	7.44	5.8	100.87	101.01	5.05	5.07	93.9	93.76
733.019	5.09	3.94	4.84	5.19	47.11	28.35	101.4	100.78	23.4	12.92	99.59	98.73	33.15	20.71	97.95	96.76	3.8	4.85	11.93	10.35	39.88	10.43	106.73	99.52	36.41	17.44	101.17	99.91	6.88	5.5	101.03	100.98	4.71	4.61	93.96	94.24
733.338	5.91	4.2	4.91	5.18	47.69	28.87	101.44	100.64	23.98	14.18	99.76	98.75	33.05	21.25	97.69	96.87	5	5.29	12.02	10.36	40.62	12.07	106.95	99.63	35.79	18.34	101.24	100.03	7.54	5.88	100.97	101.18	5.87	5.83	94.11	94.16
733.657	3.97	3.16	4.92	5.17	45.73	27.53	101.54	100.47	22.04	13.14	99.6	98.75	31.43	20.29	97.84	97.02	3.4	4.61	12.07	10.45	38.8	10.37	106.6	99.83	35.41	17.44	101.47	100.13	7.6	4.88	101.1	101.17	3.89	3.63	94.02	94.42
733.976	5.05	4.22	4.97	5.29	46.31	26.89	101.44	100.6	22.92	12.84	99.37	98.45	32.29	20.41	97.39	96.5	3.76	5.03	12.16	10.45	38.24	10.61	106.6	99.62	35.27	18.16	100.89	99.83	7.44	5.54	100.86	101.29	4.51	5.19	94.09	93.7
734.295	4.09	3.92	4.95	5.25	45.71	26.57	101.22	100.35	22.84	13.12	99.15	98.35	31.41	19.89	97.43	96.43	4.04	4.69	12.23	10.64	38.14	9.97	106.35	99.35	34.37	17.52	100.68	99.7	6.94	5.26	100.76	100.67	5.29	4.19	93.75	93.85
734.614	4.45	3.98	4.97	5.27	44.57	26.11	101.39	100.49	23.28	13.68	99.39	98.48	31.71	19.37	97.6	96.66	3.96	3.99	12.25	10.52	38.72	9.59	106.62	99.52	33.57	16.9	101.12	99.75	7.38	4.78	101.01	101.17	4.53	4.73	94.01	93.95
734.933	4.39	4.24	5.16	5.35	45.07	27.11	101.48	100.54	22.16	12.98	99.61	98.66	31.29	19.53	97.75	97	4.12	3.87	12.36	10.65	37.52	9.39	106.67	99.49	33.35	16.62	101.22	99.91	6.56	4.84	101.04	101.32	5.39	4.85	94.08	94.02
735.252	3.63	4.34	5.05	5.33	44.41	26.71	101.29	100.41	21.76	12.52	99.38	98.54	29.89	18.81	97.52	96.6	4.02	3.51	12.45	10.74	36.42	9.37	106.1	99.26	32.67	15.8	100.91	99.99	7.18	5.32	100.9	101.06	4.15	4.51	94.03	93.82
735.57	4.17	3.62	5.04	5.14	42.83	27.39	100.98	100.19	22.32	13.2	99.68	98.67	29.93	18.95	97.31	96.3	4.66	4.21	12.49	10.68	37.28	10.25	106.07	99.43	33.17	16.16	100.79	99.46	6.98	5.38	100.86	101	5.35	3.95	93.75	93.93
735.889	3.71	4.86	4.99	5.23	43.55	27.09	101.41	100.58	21.7	14	99.46	98.62	29.63	19.39	97.43	96.81	4.5	4.49	12.48	10.76	37.42	10.31	106.32	99.61	33.01	17.28	101.06	99.96	7.28	6.44	101.08	101.23	5.45	3.57	94.07	94.07
736.208	3.45	3.72	5.22	5.35	42.75	25.69	101.42	100.53	20.9	11.82	99.85	98.71	29.49	18.97	97.68	96.87	3.22	3.93	12.57	10.79	36.18	9.53	106.25	99.49	31.49	15.28	100.93	99.92	6.54	5.62	101.13	101.03	3.93	4.19	94.17	94.07
736.526	3.81	4.38	5.2	5.4	42.79	25.81	101.2	100.4	21.48	12.32	99.59	98.56	29.03	18.89	97.58	96.75	5.08	4.33	12.62	10.88	36.78	9.47	106.29	99.41	31.11	16.48	100.98	100.03	7.3	5.44	100.89	101.46	4.91	3.79	94.29	93.98
736.845	3.55	4.38	5.26	5.43	40.91	25.67	101.04	100.52	21.28	12.22	99.42	98.23	28.85	17.63	97.39	96.74	3.96	3.95	12.81	11.04	35.62	9.29	106.32	99.36	31.15	15.12	100.74	99.81	6.98	4.68	101.17	101.22	5.39	4.35	94	94.12
737.163	4.17	4.2	5.17	5.44	39.97	24.05	101.09	100.27	21.32	12.5	99.25	98.36	28.07	18.05	97.4	96.47	4.68	4.37	12.8	11.04	36.06	9.93	106.04	99.22	31.33	16.04	100.6	99.69	7.1	4.82	100.82	100.99	5.15	4.15	93.72	94.1
737.482	4.27	3.52	5.33	5.48	39.27	24.43	101.14	100.34	19.76	11.28	99.14	98.57	28.01	16.79	97.33	96.52	3.46	4.63	12.91	11.1	34.66	9.63	105.95	99.23	30.07	15.16	100.97	99.69	6.4	4.42	100.96	100.93	4.39	4.35	93.69	93.87
737.8	4.09	3.76	5.36	5.46	40.01	23.99	101.12	100.42	20.42	11.98	99.35	98.74	28.31	17.97	97.49	96.86	4.32	3.43	12.95	11.09	35.42	10.09	105.99	99.48	30.03	15.5	101.01	99.98	6.84	5.16	101.21	101.34	5.11	4.75	94.16	94.38
738.119	5.77	4.44	5.45	5.48	41.53	25.93	101.09	100.42	21.04	13.46	99.54	98.34	28.73	19.71	97.67	96.87	5.88	6.29	13.07	11.3	36.22	11.65	105.78	99.28	31.55	16.88	100.96	100	8.26	6.46	101.17	101.09	6.41	6.05	94.3	94.2
738.437	4.29	3.72	5.45	5.73	39.11	22.65	100.99	100.28	20.38	11.84	99.46	98.64	27.35	18.25	97.41	96.81	4.24	3.69	13.21	11.36	34.62	9.49	106.11	99.43	29.03	14.66	100.95	99.67	6.18	5.12	101.08	101.46	4.77	4.13	94.13	94.03
738.755	4.25	3.74	5.51	5.59	39.23	23.51	101.01	100.41	20.26	11.86	99.45	98.75	26.35	17.93	97.3	96.62	3.42	3.69	13.27	11.38	34.38	9.33	105.93	99.43	29.81	14.36	100.79	99.77	6.64	5.28	101.24	101.12	4.87	4.83	93.88	94.2
739.073	3.95	4.12	5.51	5.69	38.21	23.27	100.92	100.23	20.14	12	99.12	98.39	25.47	16.93	97.29	96.35	3.8	3.59	13.44	11.43	32.68	9.13	105.86	99.2	30.09	14.82	100.55	99.69	7.38	5.26	100.94	100.84	5.03	4.45	93.83	93.98
739.392	4.33	3.96	5.52	5.68	37.93	23.69	101.3	100.47	18.86	11.02	99.34	98.69	25.67	17.65	97.44	96.71	3.86	3.59	13.5	11.46	33.16	8.75	105.96	99.63	27.91	13.94	100.9	99.84	6.04	5.08	101.12	101.17	4.01	4.27	94.29	94.09
739.71	4.95	4.56	5.61	5.6	37.87	23.47	101.18	100.42	19.92	11.72	99.69	98.86	26.45	16.83	97.54	96.82	4.96	4.75	13.51	11.64	33	9.83	105.94	99.71	29.95	15.08	101.08	100.2	7.32	4.84	101.39	101.62	4.93	3.95	94.45	94.58
740.028	3.85	3.72	5.62	5.69	37.31	23.41	100.87	100.41	18.76	10.76	99.29	98.42	25.15	16.87	97.51	96.62	4.42	3.99	13.6	11.63	32.38	8.89	105.7	99.52	27.75	13.52	100.92	99.81	6.1	5.42	101.15	101.32	4.03	4.41	94.36	93.96
740.346	4.91	4.44	5.58	5.72	38.51	23.55	100.56	100.28	19.3	12.16	99.41	98.52	26.55	17.27	97.25	96.64	4.52	4.61	13.63	11.69	33.26	9.37	105.52	99.62	29.37	14.28	100.54	99.92	7.5	6.4	101.03	101.13	6.33	4.09	94.13	94
740.664	3.19	3.72	5.75	5.77	36.13	22.95	101.05	100.45	18.84	11.68	99.54	98.67	25.73	16.69	97.37	96.81	3.94	4.37	13.79	11.83	31.36	8.67	105.83	99.46	27.01	13.76	100.87	99.89	6.9	5.26	101.05	101.48	4.11	3.55	94.41	94.12
740.982	5.27	3.86	5.75	5.8	35.85	21.55	100.83	100.34	19.02	11.44	99.33	98.38	24.69	16.39	97.14	96.53	4.1	3.85	13.67	11.88	32.6	9.73	105.29	99.46	27.73	13.64	100.61	99.68	6.88	5.8	101.1	101.28	4.69	4.57	94.15	94.05
741.299	4.03	4.04	5.93	5.93	35.45	21.59	100.8	100.57	18.9	11.04	99.33	98.54	25.07	15.87	97.19	96.58	3.64	4.77	14	12	32.9	8.79	105.55	99.22	27.63	13.92	100.96	99.83	6.86	5.46	101.08	101.29	4.55	4.05	94.2	94.16
741.617	5.21	4.64	5.93	5.93	36.17	22.37	100.75	100.41	19.08	11.84	99.32	98.45	25.59	16.75	97.13	96.64	4.54	4.09	13.94	12.05	32.7	9.81	105.33	99.27	27.27	13.96	100.74	99.66	6.58	5.7	101.14	101.05	5.61	4.69	94.15	94.09
741.935	4.21	4.02	6	6.01	34.35	21.17	100.79	100.6	17.9	11.1	99.29	98.67	24.07	15.37	97.25	96.56	3.7	4.01	14.06	12.12	30.66	8.53	105.43	99.49	26.73	13.72	100.9	99.64	6.46	5.06	101.1	101.26	4.53	3.65	94.09	94.13
742.253	4.55	4.16	6.1	6.09	33.53	20.87	100.5	100.08	18	11.06	99.37	98.49	23.93	15.93	97.33	96.41	4.46	4.01	14.13	12.28	30.86	9.37	105.18	99.06	26.21	13.08	100.5	99.64	5.7	4.74	100.94	101.24	4.59	3.93	93.95	93.71
742.57	3.85	4.02	6.27	6.2	32.87	20.27	100.67	99.92	16.38	10.7	99.2	98.44	22.97	15.61	97.2	96.47	3.18	4.07	14.33	12.27	29.88	8.59	105.1	99.29	25.57	13.36	100.53	99.61	6.66	5.32	100.95	101.15	4.31	4.05	93.93	93.69
742.888	4.47	3.78	6.23	6.26	33.37	20.87	100.49	99.86	18.3	10.52	99.16	98.78	23.11	15.39	96.77	96.34	3.96	4.11	14.54	12.5	29.74	9.29	104.76	98.99	25.03	12.98	100.19	99.54	6.36	5.18	100.79	100.76	4.61	4.27	93.88	93.87
743.206	3.63	3.16	6.24	6.28	33.47	20.49	100.54	100.18	17.12	10.46	99.14	98.77	21.69	15.69	96.92	96.54	2.92	3.99	14.69	12.51	30.16	7.39	105.11	99.47	25.15	12.44	100.53	99.6	5.08	5.44	100.85	101.21	4.95	4.67	94.07	93.9
743.523	5.25	3.84	6.33	6.3	32.29	20.69	100.48	100.13	17	10.94	99.09	98.33	22.99	15.11	96.79	96.59	3.92	3.99	14.73	12.59	30.06	7.45	105.08	99.16	24.93	12.34	100.35	99.53	6.8	4.6	100.81	101.25	4.89	5.29	94.08	93.78
743.841	4.57	4.16	6.45	6.44	32.73	20.83	100.57	100.19	17.92	11.58	98.84	98.67	23.35	15.65	96.91	96.58	4.44	5.47	14.89	12.78	30.28	8.83	105.11	99.13	25.49	13.26	100.4	99.74	7.14	6.64	101.17	101.11	5.69	5.05	94.24	93.81
744.158	5.11	5.36	6.56	6.45	32.43	20.41	100.5	99.88	17	10.76	99	98.61	22.91	14.95	97.02	96.43	5	4.63	14.87	12.94	28.62	9.25	104.56	99.03	24.69	12.84	100.36	99.75	6.62	5.34	100.94	101.19	4.91	4.41	94.03	93.97
744.475	6.43	6.48	6.66	6.59	34.13	22.01	100.62	100.59	19.3	13.94	99.36	98.63	24.75	17.99	97.08	96.67	7.22	7.33	15.07	13.04	31.08	11.21	105.09	99.49	26.95	15.28	100.73	99.64	9.12	8.18	101.06	101.36	7.25	7.01	94.1	94.15
744.793	3.99	4.32	6.55	6.58	30.25	20.17	100.83	100.13	16.78	10.22	99.24	98.39	22.11	15.07	97.06	96.35	4.7	5.09	15.01	12.98	28.86	9.43	105	99.33	24.29	12.38	100.64	99.9	6.12	5.78	101.13	101.38	4.63	5.39	94.27	93.9
745.11	4.33	3.76	6.95	6.8	31.45	18.93	100.66	100.18	16.78	10.64	99.19	98.72	21.69	14.89	97.07	96.69	4.74	4.83	15.25	13.26	29.32	8.31	105.24	99.21	23.81	13.1	100.55	100.02	7.54	5.62	101.57	101.45	4.37	5.19	94.13	94.23
745.427	4.15	3.62	6.83	6.76	30.67	19.05	100.35	99.92	16.86	9.82	99.14	98.4	21.77	14.63	97.03	96.52	3.76	4.39	15.11	13.17	27.3	8.49	104.55	99.17	22.59	11.92	100.3	99.54	5.24	5.08	101.16	101.25	4.19	5.17	94.13	94.05
745.744	4.11	4.1	7.02	6.82	29.39	18.51	100.56	100.16	15.22	10.04	99.07	98.48	21.33	13.43	97.08	96.41	3.98	4.01	15.48	13.26	28.4	7.15	104.6	99.18	21.93	12.5	100.4	99.79	5.7	4.52	101.07	101.43	4.89	4.41	94.17	94
746.061	4.23	3.48	7.2	7.08	29.71	17.95	100.44	100.14	15.7	9.04	99.3	98.55	21.03	14.45	96.62	96.39	3.8	4.13	15.6	13.53	27.44	8.55	104.33	99.21	22.21	12	100.24	99.78	6.1	5.02	101.23	101.15	5.63	3.67	94.16	94.18
746.379	3.87	3.46	7.37	7.18	28.69	17.71	100.2	100.09	14.48	8.8	99.1	98.56	20.23	14.21	96.97	96.55	3.78	3.85	15.77	13.5	27.5	7.31	104.58	98.94	21.99	11.84	100.54	99.3	5.64	4.56	100.88	101.11	4.63	4.65	94.22	94.12
746.696	3.73	3.7	7.57	7.22	28.41	18.09	100.36	100.23	15.42	9.72	99.19	98.57	19.51	14.05	96.95	96.42	3.84	3.81	15.82	13.65	27.14	8.03	104.5	99.38	21.33	10.62	100.47	99.48	6.12	4.62	101.04	101.59	5.13	4.93	94.26	93.59
747.013	3.09	3.84	7.85	7.35	28.13	17.53	100.32	100.34	14.56	9.32	99.36	98.7	19.55	13.67	97.33	96.74	3.96	4.47	15.99	13.81	26.66	8.01	104.75	99.62	21.85	11.6	100.53	99.96	6.26	5.58	101.28	101.61	4.79	4.19	94.29	94.28
747.329	4.11	3.14	7.86	7.54	27.89	17.87	100.57	100.19	15.72	10.52	99.18	98.67	19.77	14.13	96.62	96.51	3.38	4.01	16.04	13.9	26.44	7.45	104.6	99.22	20.77	11.22	100.38	99.57	6.22	4.7	101.08	101.21	4.69	5.25	93.92	93.92
747.646	4.09	3.76	7.97	7.58	26.55	17.01	100.1	100.06	14.72	9.48	99.19	98.7	18.67	13.77	96.71	96.45	4.64	3.97	16.22	13.98	25.46	7.43	104.58	99.18	20.43	11.32	100.58	99.53	6.16	4.8	101.2	101.5	4.27	3.87	94.11	94
747.963	4.39	3.56	8.08	7.75	26.97	17.03	100.61	100.4	15.04	10.06	99.2	98.85	19.63	12.67	97.17	96.96	4.88	4.43	16.39	14.01	25.48	8.01	104.72	99.54	20.67	10.7	100.64	99.78	6.66	5.08	101.37	101.67	3.91	4.25	94.37	94.12
748.28	4.55	3.34	8.38	7.91	26.85	16.93	100.6	100.05	14.66	9.28	99.52	98.54	18.57	13.25	96.98	96.61	4.62	4.07	16.6	14.05	25.48	7.43	104.18	99.22	20.45	10.9	100.45	99.26	5.66	4.72	101.07	101.32	4.13	4.59	94.01	94.14
748.597	4.63	4.92	8.61	8.09	26.83	18.07	100.29	100.24	15.9	10.04	99.05	98.25	19.57	13.43	97	96.67	4.88	5.45	16.61	14.26	24.88	6.89	104.15	99.33	21.47	11.18	99.98	99.51	6.34	5.64	101.18	101.37	5.43	4.95	94.04	94.05
748.913	3.41	3.8	8.84	8.17	26.11	16.45	100.3	100.09	14.14	8.82	99.46	98.5	19.37	11.89	97.03	96.39	4.22	3.93	16.73	14.44	24.52	7.15	104.18	99.18	19.35	11.26	100.34	99.65	6.04	4.4	101.4	101.64	4.25	3.69	94.21	93.81
749.23	5.41	6.44	9.05	8.53	27.61	18.43	100.36	100.14	16.32	11.2	99.41	98.39	20.89	14.15	96.98	96.55	5.92	6.81	16.86	14.45	27.44	9.65	104.58	98.84	21.59	12.9	100.18	99.74	7	6.72	101.38	101.55	6.07	6.03	94.3	93.84
749.547	3.59	4.26	8.98	8.51	26.45	16.43	99.7	100.03	14.56	9.16	99.13	98.55	18.67	12.93	96.62	96.09	4.86	4.27	16.9	14.57	24.64	6.81	103.96	99.25	19.79	10.88	100.31	99.69	4.84	5.08	100.95	101.26	4.49	4.19	93.95	93.72
749.863	5.05	4.3	9.26	8.63	25.61	16.51	100.49	100.18	14.72	8.06	99.19	98.49	17.51	12.89	96.81	96.45	3.3	4.05	17.05	14.61	24.56	7.99	103.91	99.09	18.81	10.66	100.26	99.26	5.52	5.94	101.32	101.47	4.95	4.67	94.32	93.95
750.18	4.23	4.38	9.36	8.78	24.47	16.49	100.46	100.16	13.52	9.24	99.2	98.33	18.33	12.37	96.9	96.64	4.06	4.93	17.13	14.66	24.74	7.73	104.09	99.35	18.65	11.44	100.35	99.76	6.04	4.76	101.25	101.67	4.35	4.61	94.11	94.07
750.496	4.77	3.44	9.78	8.98	24.65	16.39	100.3	100.18	13.54	8.82	99.48	98.53	18.05	12.35	96.93	96.54	4.12	3.33	17.2	14.9	24.12	7.79	104.16	99.04	19.77	11.78	100.51	99.67	6.7	5.38	101.18	101.46	4.69	4.55	94.31	93.95
750.812	3.93	4.04	9.93	9.25	23.19	15.23	100.01	99.85	13.32	9.32	98.7	98.24	17.61	11.47	96.59	96.66	3.12	3.25	17.59	14.95	24.48	6.99	103.83	98.89	19.51	10.7	100.22	99.5	5.58	5.26	100.73	101.41	3.55	4.05	93.97	93.76
751.129	3.91	3.56	10.16	9.33	23.33	14.97	100.11	99.75	13.68	8.14	98.97	98.3	16.99	12.53	96.72	96.39	4.56	3.39	17.5	15.06	23.96	6.77	103.91	99.1	18.81	10.12	100.27	99.34	5.88	4.5	100.9	101.37	4.35	3.97	93.78	93.9
751.445	3.19	4.14	10.43	9.61	23.03	15.13	100.01	99.77	13.2	8.78	99.07	98.3	16.93	11.89	96.64	96.53	2.56	3.35	17.71	15.21	23.3	5.83	103.98	98.99	17.99	10.64	100.18	99.44	5.6	3.9	101	101.23	3.93	4.75	93.99	93.98
751.761	4.01	4.16	10.66	9.95	23.15	15.17	100.24	100.12	13.9	8.74	99.26	98.8	16.47	11.67	96.87	96.31	4.52	3.69	17.66	15.29	22.22	7.59	103.77	99.13	18.49	10.3	99.92	99.41	6.16	4.46	100.98	101.38	4.41	5.15	93.97	93.97
752.077	3.45	4.52	10.93	10.12	23.11	15.45	100.09	100.05	12.22	9.66	98.79	98.29	15.99	11.89	96.57	96.34	4.16	3.75	17.91	15.39	22.3	7.25	103.65	98.77	17.85	9.94	99.92	99.63	5.46	4.42	101.2	101.18	3.95	4.19	94.05	93.89
752.394	4.27	3.76	11.39	10.38	23.43	14.79	100.59	100.16	12.94	9.42	99.32	98.9	16.11	11.07	96.84	96.65	3.86	4.59	18.14	15.56	22.96	7.91	103.79	99.2	17.77	10.16	100.5	99.95	5.54	4.04	101.32	101.38	4.31	4.53	94.2	94.21
752.71	3.75	3.34	11.44	10.54	22.09	14.89	100.27	100.04	13.04	8.82	98.96	98.55	15.65	11.29	96.67	96.39	4.12	4.29	18.15	15.53	22	6.57	103.78	99.33	17.61	9.92	100.23	99.55	5.64	4.5	101.31	101.45	4.07	4.25	94.04	94.03
753.026	4.29	3.86	11.97	10.78	23.29	14.11	100.07	99.81	13.94	8.78	98.89	98.18	16.25	10.39	96.77	96.19	4.1	4.53	18.37	15.67	21.44	6.13	103.48	99.08	17.49	9.54	100.01	99.52	5.6	4.62	101	101.34	3.79	4.11	93.71	93.85
753.342	3.17	3.86	12.22	11.13	21.21	14.63	100.3	100.35	12.3	8.22	99.31	98.73	16.15	11.41	96.72	96.45	4.26	4.05	18.46	15.77	22.24	7.47	103.88	99.11	17.67	10.5	100.19	99.51	5.02	5.1	101.15	101.34	4.85	3.99	94.17	93.99
753.658	4.81	4.16	12.55	11.38	23.01	15.39	100.05	99.78	13.78	9.42	98.95	98.44	15.95	11.87	96.48	96.51	4.18	5.01	18.46	15.98	22.28	8.33	103.36	99.11	17.83	10.36	99.74	99.28	6.56	5.68	100.78	101.39	5.19	5.11	93.96	93.77
753.973	4.47	4.92	12.92	11.7	22.03	14.25	100.01	99.99	13.82	8.02	98.8	98.51	15.81	11.27	96.65	96.24	4.56	3.89	18.71	16.13	22.06	6.63	103.78	98.92	16.51	10.18	99.7	99.64	6	5.08	101.34	101.12	4.75	4.69	94.13	94.1
754.289	4.39	4.5	13.29	11.96	22.11	14.19	99.76	99.73	13.1	8.04	99.04	98.28	15.79	12.01	96.37	96.33	3.64	5.49	18.83	16.19	21.32	7.47	103.51	99	16.67	9.64	99.86	99.45	6.36	4.56	101	101.05	4.59	3.93	93.95	94
754.605	4.33	4.34	13.66	12.25	21.71	14.07	99.88	99.71	12.72	8.94	99.3	98.61	15.43	10.87	96.89	96.54	4.82	3.33	18.92	16.24	22.22	7.55	103.58	99.26	17.25	9.46	100.11	99.36	5.54	3.86	101.02	101.21	4.13	5.17	94.1	93.77
754.921	4.15	4.02	13.89	12.58	20.97	13.93	99.9	99.96	12.52	7.96	99.21	98.5	15.09	10.85	97.01	96.47	4.2	3.59	18.98	16.42	20.64	6.13	103.21	98.88	16.69	9.26	99.93	99.29	5.68	5.08	101.15	101.34	4.01	3.33	94.16	93.77
755.236	4.21	3.56	14.3	12.79	20.61	13.01	99.84	99.75	11.98	7.9	99.04	98.15	15.61	10.57	96.39	96.47	3.7	4.39	19.16	16.39	20.82	6.55	103.29	98.8	15.59	9.5	99.76	99.32	5.28	5.04	101.3	101.34	3.97	4.33	93.9	93.76
755.552	4.47	3.9	14.7	13.26	20.83	14.23	100.11	100.01	12.56	8.34	99.1	98.62	15.53	11.41	96.55	96.63	3.54	4.51	19.21	16.51	21.08	7.73	103.78	99.37	16.53	10	100.22	99.55	5.78	5.16	101.3	101.46	5.23	4.43	93.91	94.31
755.868	4.25	3.94	15.15	13.71	20.89	13.05	100.31	100.2	11.46	8.7	99.41	98.62	15.21	10.67	96.85	96.89	3.96	4.85	19.38	16.62	21.64	6.59	103.72	99.27	16.97	9.4	100.42	99.72	6.46	4.8	101.64	101.71	5.29	3.95	94.03	94.28
756.183	4.99	4.62	15.48	13.96	20.47	13.75	99.7	99.51	12.18	8.9	98.92	98.35	15.01	10.83	96.35	96.2	4.48	3.65	19.36	16.67	20.86	7.05	103.09	98.75	16.05	9.48	100.06	99.51	6.2	6.22	100.8	101.11	4.83	4.31	93.78	93.74
756.499	4.21	4.5	15.9	14.24	19.99	13.73	100.11	99.9	12.32	8.92	99.1	98.59	13.95	10.95	96.61	96.24	4.04	4.03	19.55	16.78	19.76	6.49	103.24	99.02	16.43	9.04	99.82	99.38	6.24	4.76	101.09	101.4	3.83	3.71	93.78	94.08
756.814	4.49	3.8	16.53	14.71	20.91	13.67	99.74	100	12.04	8.82	98.98	98.82	14.71	11.45	96.63	96.52	4.4	4.61	19.65	17.13	19.74	6.69	103.23	98.69	16.71	9.1	100.06	99.77	6.86	5.46	101.21	101.42	4.51	4.79	93.88	93.89
757.129	4.71	4.08	16.84	15.05	18.81	13.09	99.71	99.8	11.46	8.08	98.63	98.37	13.71	11.39	96.21	96.22	3.6	3.91	19.89	17.19	19.54	7.83	102.67	98.75	15.65	8.7	99.77	99.03	6.2	4.82	100.55	101.15	3.99	3.27	93.57	93.65
757.445	4.29	3.44	17.33	15.43	19.29	12.75	99.73	99.88	11.24	7.6	99.18	98.51	14.07	9.45	96.68	96.63	3.96	4.33	20	17.15	19.64	6.71	103.14	99.08	15.53	8.8	100.05	99.43	5.38	5.88	101.08	101.29	3.99	3.93	94.13	94
757.76	3.55	3.44	17.81	15.74	18.67	12.53	100	99.79	11.12	8.22	99.13	98.23	13.79	10.31	96.62	96.48	3.56	4.13	19.95	17.27	19.46	7.05	103.13	99.31	14.53	9.16	99.74	99.39	5.48	4.7	101.11	101.52	4.63	4.17	94.32	94.06
758.075	4.11	3.92	18.22	16.13	19.07	13.09	99.76	99.83	11.38	8.3	98.97	98.53	14.63	10.21	96.46	96.45	4.56	4.21	20.09	17.27	19.14	6.45	103.1	99.13	15.23	9.64	99.96	99.6	5.28	5.26	101.16	101.57	4.43	4.13	94.04	93.93
758.39	4.31	3.78	18.63	16.93	18.35	12.55	100.15	99.92	11.92	7.94	99.4	98.47	14.55	10.07	96.64	96.47	4.84	5.03	20.28	17.62	19.56	5.93	102.97	99.07	15.07	8.38	99.97	99.5	5.86	4.52	101.23	101.39	4.23	4.47	94.39	94.11
758.706	5.01	4.32	19.1	17.11	19.43	14.27	99.71	99.81	12.12	8.08	98.73	97.85	14.37	10.37	96.17	96.39	5.02	5.13	20.22	17.56	20.02	7.83	102.9	98.9	15.23	10.9	99.72	99.4	5.86	5	100.95	101.61	4.65	4.53	94.04	93.78
759.021	3.55	3.48	19.7	17.49	18.55	12.67	99.69	99.87	10.56	6.98	98.69	98.46	13.63	10.63	96.39	96.17	3.7	3.59	20.41	17.63	19.84	6.31	102.73	98.96	14.13	8.96	99.51	99.43	5.02	4.08	100.87	101.16	4.11	4.03	93.89	93.84
759.336	4.19	3.66	20.15	17.78	17.87	12.03	99.79	99.93	10.34	7.74	98.86	98.74	14.35	10.05	96.71	96.29	4.06	3.75	20.52	17.77	19.48	6.79	102.92	99.3	14.01	8.56	99.81	99.45	4.98	3.66	101.39	101.35	4.17	4.83	94.17	93.72
759.651	6.69	6.74	20.66	18.31	21.59	14.83	99.67	99.79	14.02	10.38	99.31	98.32	16.61	12.81	96.39	96.32	6.56	6.45	20.62	17.76	21.82	10.13	102.73	99.25	17.11	11.22	99.85	99.32	8.38	6.9	100.94	101.26	7.07	6.97	94.19	93.89
759.966	4.07	3.48	21.12	18.84	18.33	11.97	99.97	100.06	11.14	7.7	99.07	98.57	13.27	10.51	96.87	96.3	3.04	4.31	20.78	18.04	17.74	6.19	103.15	99.2	13.91	8.48	100.08	99.52	5.6	4.62	101.07	101.85	4.89	4.59	94.19	93.97
760.28	3.97	3.1	21.63	19.26	17.11	12.01	99.72	100.18	11.4	7.78	98.95	98.6	12.93	9.39	96.74	96.45	4.06	3.83	20.85	18.04	18.48	5.59	103.11	99.11	13.13	8.18	100.15	99.45	5.56	4.12	101.6	101.49	4.37	3.99	94.41	94.33
760.595	3.81	4.08	22.16	19.72	16.59	12.69	99.98	100.25	10.4	7.74	99.57	98.67	12.57	9.83	96.79	96.57	4.14	3.75	20.91	18.04	19.02	5.53	103.15	99.73	14.09	8.54	100.5	99.75	4.56	4.6	101.43	101.85	4.33	3.03	94.58	94.16
760.91	6.85	6.98	22.5	19.96	19.33	15.23	99.57	100.14	12.54	9.84	98.88	98.68	15.75	11.93	96.58	96.31	6.16	6.45	20.93	18.07	21.14	8.63	102.91	98.84	16.61	10.88	99.68	99.55	7.98	6.8	101.08	101.54	6.49	6.27	94.1	94.12
761.225	4.17	3.66	23.1	20.63	18.13	11.95	99.81	100.16	10.96	7.2	99.21	98.69	13.33	9.97	96.65	96.78	4.82	3.55	20.94	18.16	17.98	6.15	102.88	99.08	14.19	7.48	100.28	99.55	4.08	4.2	101.47	101.52	4.27	4.17	94.2	94.11
761.539	3.85	3.88	23.71	20.92	16.73	11.95	99.58	99.81	11.22	7.14	99	98.33	12.39	9.39	96.29	96.18	4	4.81	21.07	18.38	18.12	6.71	102.27	99.11	13.15	7.82	99.81	99.43	4.54	4.14	101.13	101.2	4.49	3.87	94.05	94.07
761.854	4.71	4.5	24.12	21.42	17.43	11.89	99.74	100.07	10.62	7.28	99.2	98.69	13.23	9.25	96.45	96.45	4.48	3.35	21.35	18.2	17.92	6.25	102.79	99.12	13.37	8.24	99.81	99.64	5.48	5.1	101.41	101.79	4.49	4.29	94.3	94.09
762.169	3.57	4.2	24.87	22	17.53	12.35	99.85	100.08	10.42	7.82	99.05	98.27	13.23	10.13	96.25	96.29	2.56	3.95	21.4	18.48	17.7	5.43	102.65	98.97	13.77	7.8	99.87	99.4	5.26	5.4	101.2	101.44	3.99	4.29	94.08	94.1
762.483	3.65	3.78	25.3	22.52	16.87	12.13	99.61	100.09	10.66	6.66	98.99	98.81	12.83	8.87	96.75	96.69	3.68	4.19	21.45	18.56	17.08	5.51	102.74	99.2	13.37	9.68	99.95	99.72	4.5	4.36	101.29	101.6	4.25	3.71	93.96	94.19
762.798	4.89	4.24	25.85	22.87	17.83	12.21	99.45	99.98	11.2	8.38	98.92	98.93	12.65	9.59	96.48	96.15	4.18	4.67	21.45	18.54	17.6	6.73	102.56	99.24	14.21	8.98	99.88	99.55	6.02	5.12	101.19	101.34	4.53	4.15	93.87	94.26
763.112	4.89	4.18	26.17	23.48	16.99	11.65	100	99.97	10.24	7.16	99.01	98.75	13.01	9.63	96.89	96.55	4.18	5.15	21.51	18.68	17.04	6.23	102.68	99.27	13.19	9.42	100.01	99.73	4.92	4.26	101.23	101.41	4.87	4.09	94.05	94.39
763.426	3.97	3.5	26.81	23.91	15.91	11.37	99.42	99.82	9.2	6.46	99.06	98.53	11.97	8.87	96.35	96.29	3.2	3.61	21.77	18.73	17.12	6.01	102.32	98.9	13.77	7.94	99.5	99.25	4.66	4.3	101.09	101.59	4.33	3.61	93.85	94.02
763.741	3.49	3.3	27.52	24.48	15.67	10.35	100.04	99.97	9.98	7.5	99.28	98.81	11.93	9.79	96.59	96.45	3.7	3.73	21.89	18.92	17.52	5.75	102.79	99.15	12.83	8.64	100.02	99.57	5.06	4.08	101.5	101.73	4.83	4.23	94.24	94.11
764.055	4.31	3.2	27.79	24.74	16.19	11.07	99.51	99.78	10.04	7.36	99.14	98.31	12.55	9.53	96.35	96.09	3.72	4.41	21.79	18.65	17.78	5.93	102.13	98.89	13.27	7.9	99.64	99.38	5.54	4	101.05	101.52	4.61	5.09	94.06	94.08
764.369	3.63	3.16	28.4	25.33	15.65	11.51	99.86	100.03	9.88	8.2	99.13	98.73	12.03	9.25	96.55	96.37	3.7	3.97	21.83	18.89	16.34	6.63	102.36	99.14	12.41	8.04	99.94	99.42	5.46	4.54	101.25	101.52	4.61	3.87	94.24	94.31
764.683	4.11	3.76	28.87	25.87	16.33	11.93	99.27	99.87	10.46	7.18	99.11	98.3	11.73	9.25	96.51	96.13	4.06	3.67	21.86	18.95	17.1	5.63	102.22	98.8	12.99	8.38	99.34	99.19	5.44	4.06	100.93	101.37	4.21	4.65	93.86	94.07
764.998	3.89	3.82	29.57	26.28	15.65	11.51	99.84	99.81	10.02	7.4	99.08	98.5	11.35	9.55	96.54	96.61	4.06	4.01	22.07	19.05	16.78	5.21	102.16	98.92	12.65	7.6	99.84	99.54	5.54	4.82	100.94	101.56	4.11	3.07	94.16	94.27
765.312	4.45	4.78	30.04	26.78	15.11	11.39	99.48	100	9.86	7.16	99.32	98.71	11.69	8.47	96.36	96.18	3.86	4.13	21.95	19.05	15.6	5.41	102.32	99.08	12.43	7.24	99.75	99.59	4.84	4.58	101.21	101.55	3.53	3.95	94.29	94.22
765.626	4.97	4.6	30.54	27.26	15.85	11.27	99.46	99.7	10.68	8.1	99.21	98.33	12.45	9.63	96.21	96.51	4.22	5.49	22.2	19.03	17.54	6.75	102.25	98.98	12.71	8.18	99.71	99.19	5.66	5.02	101.25	101.47	4.71	4.59	94.3	93.95
765.94	4.63	4.86	30.99	27.77	14.91	11.03	99.48	99.78	9.8	6.52	98.74	98.37	11.45	8.77	96.4	96.3	4.12	3.77	22.26	19	15.56	5.39	102.29	98.93	12.93	7.84	99.36	99.15	5.82	4.78	101.16	101.25	4.63	4.11	94.08	94.16
766.254	3.81	3.98	31.77	28.31	14.85	11.19	99.67	100.06	11.06	7.28	99.35	98.82	11.83	9.11	96.4	96.55	5	4.31	22.24	19.39	16.36	5.67	102.34	99.38	12.61	8.54	100.03	99.86	5.4	5.5	101.61	101.57	4.29	4.73	94.24	94.42
766.567	3.67	3.34	32.03	28.58	14.85	10.09	99.63	99.59	9.24	6.74	99.06	98.45	11.39	8.33	96.36	96.5	4.16	3.75	22.28	19.09	15	6.33	102.45	98.98	11.89	7.94	99.54	99.34	4.84	3.48	101.13	101.58	3.91	3.39	94.55	94.12
766.881	3.29	3.22	32.81	29.38	15.09	10.65	99.79	100.03	9.64	7.1	99.55	99.07	11.05	8.29	96.98	96.85	4.18	3.49	22.57	19.45	16.4	5.55	102.43	99.19	11.53	7.9	99.96	100.11	5.36	3.88	101.88	101.92	4.11	3.59	94.6	94.34
767.195	4.99	3.52	33.02	29.7	15.09	10.57	99.44	99.8	9.5	6.52	99.12	98.56	11.09	8.35	96.59	96.43	3.76	3.85	22.51	19.54	15.56	6.23	102.07	98.91	11.33	7.76	99.79	99.26	4.74	3.32	101.07	101.34	4.41	4.05	94.18	94.28
767.509	3.55	3.66	33.65	30	14.75	10.01	99.49	99.85	9.42	6.6	99.1	98.71	11.55	8.19	96.17	96.42	3.26	3.35	22.52	19.61	15	5.47	101.98	99.1	11.95	6.92	99.4	99.11	4.88	4.68	101.2	101.47	4.37	4.21	94.08	94.12
767.822	4.21	4.54	34.23	30.68	15.19	10.35	99.81	99.76	10.28	6.14	98.98	98.68	11.69	8.87	96.26	96.12	4.04	3.85	22.64	19.52	16.32	6.15	101.99	99.07	10.67	7.14	99.84	99.43	5.08	4.86	101.47	101.33	4.93	4.61	93.82	94.29
768.136	3.81	3.48	34.81	31.43	14.59	10.63	99.86	99.91	9.32	6.6	98.93	98.61	10.49	8.97	96.56	96.59	3.86	3.83	22.78	19.68	16	6.13	102.25	99.14	10.87	7.66	99.79	99.55	5.2	4.64	101.29	101.51	5.13	4.55	94.42	94.2
768.45	4.05	4.24	35.19	31.66	13.85	9.75	99.8	99.86	9.38	6.54	98.91	98.76	11.07	8.17	96.54	96.23	3.96	3.41	22.74	19.63	15.06	5.65	101.8	98.95	10.93	8.06	99.69	99.51	4.92	4.36	101	101.44	4.93	3.29	94.04	94.05
768.763	6.53	6.24	36.04	32.18	16.55	12.47	100.19	100.14	12.6	10.02	99.35	99.44	13.07	12.15	96.69	97	6.3	5.85	22.95	19.69	16.98	8.59	102.45	99.57	13.67	10.6	99.92	99.82	7.08	6.9	102.11	101.95	7.65	6.01	94.67	94.4
769.077	4.99	4.46	36.33	32.62	15.01	10.75	99.76	99.78	10.88	8.44	99.33	98.6	11.87	10.01	96.38	96.36	5.94	5.29	22.92	19.75	15.94	7.19	102.12	98.76	12.59	8.26	99.26	99.39	6.04	5.18	101.39	101.53	4.37	5.33	94.28	94.24
769.39	4.27	3.58	36.72	33.17	13.45	11.27	99.47	99.98	9.34	7.22	99.14	98.54	10.89	8.35	96.25	96.52	4.2	4.21	23.01	19.8	15.06	6.75	102.27	99.11	11.45	7.4	99.85	99.82	5.66	4.46	101.56	101.55	3.61	3.75	94.32	94.24
769.703	4.03	3.1	37.11	33.58	12.83	10.63	99.52	99.93	8.92	6.96	98.8	98.43	9.71	7.45	96.41	96.39	4.68	3.81	22.89	19.66	14.14	6.35	101.66	99.05	11.73	6.74	99.46	99.36	5.46	4.32	101.33	101.79	3.93	3.47	94.07	93.98
770.017	3.89	3.62	37.75	34.02	13.07	10.55	99.78	99.87	9.68	6.5	99.05	98.67	10.61	8.05	96.62	96.53	4.62	4.05	22.87	19.9	14.88	5.13	102.15	99.25	11.43	6.9	100.04	99.56	5.08	4.68	101.3	101.8	3.87	3.67	94.72	94.17
770.33	4.23	3.72	38.19	34.32	13.03	10.01	99.35	99.99	9.02	7.64	99	98.88	8.85	8.31	96.72	96.46	4.56	4.23	23.1	19.92	14.12	5.41	102.18	98.91	10.93	7.42	99.77	99.62	4.88	4.48	101.45	101.73	4.55	3.63	94.17	93.94
770.643	3.99	4.16	38.64	34.88	14.07	9.09	99.71	100.16	8.6	6.58	99.08	98.83	10.25	7.49	96.5	96.55	3.94	4.13	23.14	19.85	13.72	4.93	101.86	99.06	10.25	7.32	99.97	99.53	5.5	4.76	101.52	101.75	4.31	3.91	94.25	94.45
770.956	3.53	4.02	38.95	35.2	14.33	10.45	99.33	99.83	9.78	6.16	99.02	98.58	9.95	7.77	96.53	96.46	3.82	4.17	23.27	19.94	13.5	5.35	101.48	99.04	10.77	6.9	99.9	99.48	4.68	4.06	101.2	101.31	3.47	4.55	94.09	93.81
771.269	4.15	5.12	39.71	35.8	14.19	10.19	99.53	100.04	8.96	7.24	99.12	98.84	11.21	8.27	96.63	96.39	4.64	4.91	23.21	20.01	14.36	5.65	101.81	99.02	10.87	7.68	99.69	99.44	5.16	4.48	101.35	101.66	4.87	5.29	94.12	94.28
771.582	4.23	3.26	39.91	36.22	13.15	8.67	99.69	100.05	7.94	6.04	98.98	98.89	10.09	7.83	96.48	96.45	3.88	3.71	23.23	19.98	13.64	5.67	101.71	99.17	9.87	7.06	99.95	99.48	4.82	4.14	101.35	102.13	3.95	4.23	94.3	94.12
771.895	4.23	4.26	40.43	36.4	12.43	9.75	99.21	99.62	8.12	6.68	99.21	98.61	10.01	8.41	96.36	96.12	4.36	4.23	22.98	20.12	13.88	5.97	101.48	99.18	10.69	7.82	99.51	99.37	4.62	4.36	101.14	101.46	5.11	4.33	93.83	94.15
772.208	4.73	3.32	40.97	37.05	12.43	9.25	99.67	99.84	8.16	6.36	98.98	98.58	9.99	8.37	96.4	96.16	3.7	4.35	23.2	19.99	13.52	5.17	101.67	99.1	9.65	7.12	99.7	99.34	5.08	3.6	101.17	101.39	3.93	3.79	94.38	94.01
772.521	4.53	4.24	41.35	37.54	12.93	9.83	99.68	99.87	8.96	6.66	99.14	98.81	10.07	8.15	96.89	96.81	3.88	4.53	23.34	20.09	14.32	5.85	102.03	99.12	11.11	9.22	99.92	99.65	5.08	4.8	101.55	101.49	4.85	4.45	94.6	94.34
772.834	3.89	3.14	41.91	37.73	11.49	9.19	99.57	99.72	8.16	6.36	98.97	98.75	10.05	7.19	96.09	96.53	3.58	4.31	23.31	20	13.24	5.67	101.65	98.97	9.81	7.48	99.6	99.67	4.28	4.24	101.56	101.6	4.13	3.97	94.22	93.89
773.147	3.61	4.1	42.11	38.19	12.67	8.77	99.66	99.78	7.9	6.46	98.92	98.69	9.97	7.89	96.15	96.28	4.12	3.91	23.54	20.2	13.44	5.45	101.19	99.05	9.89	7.04	99.78	99.06	4.74	4.2	101.32	101.41	3.63	3.67	94.2	94.02
773.46	4.03	3.42	42.86	38.85	12.83	10.13	99.85	100.17	8.28	6.4	99.18	98.96	9.87	8.65	96.22	96.76	4.3	4.19	23.36	20.2	12.96	5.17	101.8	99.36	10.75	6.76	99.93	99.49	5.98	4.22	101.48	101.62	4.17	3.85	94.72	94.22
773.773	5.13	4.94	43.31	39.3	12.73	10.77	99.73	99.78	8.9	6.7	99.34	98.84	9.69	8.57	96.63	96.58	4.68	5.23	23.6	20.39	14.44	6.17	101.61	99.32	11.01	6.52	99.83	99.69	6	5.32	101.43	101.78	4.65	5.13	94.15	94.39
774.085	5.51	4.92	43.3	39.72	12.95	10.25	99.29	99.65	9.04	7.38	99	98.39	10.33	8.77	96.33	96.39	4.78	6.03	23.37	20.13	14.22	6.15	101.34	99.07	11.39	8.1	99.35	99.2	6.38	5.86	101.33	101.33	6.21	4.89	93.96	93.92
774.398	3.83	4.3	43.9	40.05	12.11	9.51	99.37	99.89	8.12	7.06	99.05	98.41	8.95	7.69	96.37	96.38	4.02	4.45	23.44	20.42	12.58	5.91	101.55	99.11	9.69	7.18	99.63	99.16	4.66	5.02	101.28	101.61	4.33	3.53	93.88	93.96
774.71	3.69	3.96	44.21	40.37	12.05	9.09	99.66	99.87	8.5	6.58	98.96	98.71	9.45	8.61	96.12	96.58	4.18	3.89	23.54	20.53	13.62	5.47	101.66	98.95	9.95	7.4	99.31	98.81	4.4	4.56	101.27	101.55	3.45	4.57	94.46	94.18
775.023	3.59	4.28	45.08	40.73	12.59	9.61	99.65	99.78	8.6	6.66	98.98	98.52	9.53	7.69	96.48	96.29	4.64	3.85	23.64	20.51	13.46	6.23	101.62	98.99	9.65	6.78	99.8	99.29	5.24	4.8	101.37	101.67	5.11	4.03	94.58	94.16
775.335	4.93	3.34	45.43	41.2	11.85	8.85	99.58	100.15	8.9	6.72	99.18	98.8	9.39	6.87	96.55	96.17	4.02	4.29	23.58	20.33	11.86	5.03	101.47	99.28	9.37	6.28	99.79	99.37	4.48	3.94	101.41	101.77	3.57	4.13	94.33	94.44
775.648	4.63	3.58	45.67	41.58	11.71	8.59	99.36	99.77	9.06	6.96	98.87	98.48	9.49	8.21	96.41	96.4	4.18	3.95	23.53	20.22	13.7	5.17	101.46	98.99	9.61	7.02	99.77	99.47	5.12	5.26	101.26	101.72	4.63	4.51	94.24	94.16
775.96	4.83	3.46	45.78	41.95	10.69	9.13	99.12	99.66	8.88	5.08	98.76	98.72	9.09	7.33	95.9	96.31	4.02	4.29	23.56	20.38	12.06	5.49	101.24	98.95	9.33	6.48	99.4	99.35	5.18	5.22	101.35	101.48	4.27	4.49	94.17	94.12
776.272	4.63	3.26	46.42	42.3	11.65	8.01	99.49	99.42	7.64	6.72	98.87	98.65	8.51	6.77	96.49	96.45	3.82	3.35	23.59	20.38	11.66	5.23	101.31	98.92	8.93	6.44	99.6	99.22	5	4.76	101.42	101.33	3.87	3.43	94.26	94.12
776.585	4.59	3.3	46.44	42.5	11.37	8.13	98.77	99.31	7.84	6.04	98.47	98.12	9.87	7.65	95.83	95.97	4.34	3.93	23.67	20.43	11.44	5.23	100.76	98.52	9.51	7.3	99.17	98.71	4.42	4.34	101.08	101.23	4.47	3.91	93.76	93.67
776.897	3.79	3.88	47.31	43.11	9.87	8.11	99.34	99.46	7.74	6.62	99.06	98.44	8.43	6.75	96.25	96.4	3.58	3.65	23.75	20.59	12.3	5.67	101.22	99.03	8.97	7.9	99.69	99.29	6	4.02	101.34	101.51	4.33	4.65	94.1	94.03
777.209	5.47	3.54	47.49	43.58	11.17	9.57	98.93	99.34	8.82	6.98	98.55	98.4	9.43	7.47	96.18	96.28	3.86	4.43	23.83	20.52	12.92	6.19	101.03	98.87	9.49	6.94	99.44	99.09	6.06	5.52	100.96	101.53	5.05	5.39	94.27	93.96
777.521	4.49	4.74	48.05	44.04	10.47	8.21	99.62	99.87	7.48	6.86	98.97	98.86	7.87	7.89	96.48	96.74	2.9	4.59	23.84	20.76	11.64	5.83	101.52	99.04	9.43	6.2	99.56	99.42	5.4	4.76	101.28	101.73	3.91	4.45	94.25	93.97
777.833	4.07	3.8	48.28	44.18	11.07	8.85	99.12	99.19	8.6	5.7	98.7	98.32	8.27	7.55	96.21	95.83	4.88	4.05	23.69	20.48	11.5	5.65	101.02	98.55	9.41	5.74	99.06	98.69	5.42	4.52	101.3	101.34	4.57	4.25	93.67	93.65
778.145	3.47	3.98	48.88	44.55	10.77	8.55	99.31	99.56	7.62	6.04	98.95	98.54	8.75	7.09	96.12	96.21	3.42	3.75	23.79	20.53	11.62	5.79	101.27	98.84	9.05	6.32	99.52	99.23	4.82	4.26	101.46	101.57	4.23	3.37	94.11	94.16
778.457	2.99	3.46	49.33	45.14	10.25	7.95	99.06	99.54	7.56	5.6	98.91	98.51	8.39	6.63	96.07	96.18	3.68	4.21	23.96	20.69	11.42	4.65	101.09	98.99	8.79	6.36	99.74	99.2	4.68	4.02	101.43	101.9	3.95	3.53	94.14	94.24
778.769	4.11	3.28	49.52	45.55	10.75	8.11	99.21	99.57	7.36	5.48	98.68	98.77	9.03	7.19	96.17	96.06	4.54	4.01	23.94	20.64	11.66	5.65	101.21	98.98	9.71	5.86	99.51	99.7	4.82	4.66	101.37	101.74	4.31	4.07	94.12	94.23
779.081	3.27	3.64	50.02	45.86	10.45	8.03	99.5	99.8	7.6	5.36	99.23	98.39	7.65	5.91	96.5	96.27	3.86	4.13	24.16	20.72	11.3	4.45	101.37	99.12	9.07	6.36	99.21	99.31	4.08	4.74	101.06	101.53	3.59	3.89	94.16	94.32
779.393	3.59	4.1	50.18	46.38	10.17	8.41	99.05	99.67	7.6	6.74	99.11	98.55	8.73	7.17	96.08	96.14	4.62	3.73	24.11	20.78	11.72	5.11	101.09	98.81	8.55	6.34	99.6	99.17	5.56	4.96	101.13	101.74	4.45	3.59	93.97	94.19
779.704	3.81	3.12	50.62	46.63	9.73	8.41	99.48	99.77	7.48	4.9	98.95	98.55	8.13	6.71	95.76	96.41	3.74	3.85	23.96	20.72	11	4.63	100.96	98.97	8.17	7.18	99.53	99.31	5.6	3.82	101.53	101.46	4.05	3.87	94.16	94.07
780.016	4.03	3.86	50.99	46.87	10.95	7.97	99.08	99.47	8.02	6.2	98.67	98.65	7.43	7.11	96.38	96.44	4.82	4.31	24.19	20.87	11.4	5.71	101.01	98.68	8.73	7.04	99.37	99.32	5.04	4.24	101.17	101.6	4.59	4.47	93.96	94.23
780.328	4.51	3.58	51.32	47.21	9.31	7.71	99	99.54	7.16	5.02	98.76	98.39	8.55	6.67	96.35	96.18	3.94	4.37	24.14	20.81	10.56	4.71	100.8	98.86	7.71	6.48	99.48	99.02	5.06	3.96	101.29	101.57	3.47	3.73	94.1	94.09
780.639	4.11	4.36	51.63	47.64	10.29	6.83	99.3	99.42	7.2	6.28	99.18	98.43	7.85	6.65	96.12	96.18	3.14	3.49	24.04	20.94	11.1	5.03	100.95	99	8.05	6.26	99.48	99.23	4.02	3.84	101.38	101.59	4.07	3.81	94.23	94.26
780.951	3.65	3.4	51.92	47.98	9.43	7.39	99.19	99.14	7.2	6	98.81	98.14	7.51	6.35	96.21	95.86	2.84	4.05	24.17	20.82	10.2	5.01	100.96	98.52	7.59	6.04	99.41	99.2	4.52	3.88	101.48	101.32	4.21	3.45	93.97	93.98
781.262	4.23	4.12	52.44	48.43	10.35	7.45	99.09	99.48	7.62	7.1	98.76	98.35	7.83	6.99	96.37	95.98	3.94	3.59	24.08	20.91	11.64	4.93	101.11	98.79	7.99	5.88	99.47	99.28	4.9	4.94	101.28	101.39	4.91	4.85	94.36	93.89
781.574	4.09	3.26	52.78	48.7	9.57	8.01	99.58	100.03	7.46	5.66	99.16	98.87	8.09	7.33	96.26	96.66	3.46	4.17	24.01	20.97	10.26	5.53	101.09	98.95	8.27	6.28	99.36	99.63	4.74	3.98	101.53	101.86	4.61	4.73	94.12	94.15
781.885	4.05	3.98	53.46	49.11	9.77	8.53	99.74	100.06	6.62	5.02	99.44	99.03	7.69	7.51	96.45	96.72	3.76	5.03	24.41	21.08	10.04	4.95	101.31	99.44	8.67	6.2	99.77	99.65	5.3	4.96	101.78	101.82	4.37	4.17	94.77	94.05
782.196	4.89	5.02	53.54	49.37	9.83	8.37	99.09	99.55	8	7.28	99.09	98.79	8.75	6.95	96.16	96.39	5.32	4.59	24.34	21.21	10.94	5.63	100.95	98.95	9.17	5.96	99.26	99.39	4.88	4.3	101.37	101.57	4.49	4.29	93.85	93.78
782.508	3.27	4.08	53.73	49.77	8.99	8.31	99.25	99.93	7.14	6.32	98.79	98.75	7.13	6.57	96	96.22	4	3.85	24.59	21.07	9.82	5.29	100.91	98.78	7.91	5.84	99.01	98.96	3.68	4.04	101.57	101.53	4.11	3.83	93.88	94.01
782.819	4.37	3.6	54.02	50.07	9.01	7.27	99.04	99.4	7.64	5.64	98.6	98.36	6.91	5.79	96.02	96.03	4.34	3.67	24.37	21.11	10.6	4.65	100.42	98.67	7.79	5.5	99.02	98.99	5.08	4.94	100.84	101.08	3.69	3.97	93.77	93.96
783.13	4.13	3.88	54.59	50.34	9.67	8.39	99.06	99.33	7.76	5.3	98.86	98.36	8.03	6.39	96.19	96.26	4.54	4.33	24.46	21.17	10.66	5.15	100.67	99.23	7.93	6.46	99.35	99.3	4.88	4.02	101.16	101.79	4.73	4.71	93.9	93.92
783.441	4.03	3.34	54.83	50.66	9.87	7.37	99.12	99.99	6.6	5.72	98.89	98.6	7.13	6.25	96.3	96.2	3.52	3.77	24.49	21.3	10.16	4.31	100.51	98.73	8.47	5.38	99.37	99.32	5.84	5.5	101.44	101.75	4.03	4.65	94.31	93.81
783.752	3.53	3.06	55.24	51.3	9.69	7.09	98.76	99.63	6.54	5.6	98.93	98.29	7.79	6.69	95.84	96.21	3.82	4.77	24.6	21.24	9.1	4.43	100.85	99.11	7.83	4.9	99.04	99.09	3.82	4.32	101.44	101.32	3.33	3.15	94.06	93.59
784.063	3.81	3.82	55.35	51.43	10.07	6.17	99.04	99.5	7.42	5.04	98.69	98.47	7.41	6.07	96.21	96.02	3.48	3.97	25.03	21.59	9.62	4.63	100.69	98.77	7.87	6.22	99.45	99.18	4.32	3.76	101.01	101.67	3.49	3.43	94.17	94.27
784.374	3.79	3.14	56.2	51.77	8.77	7.11	98.98	99.53	6.54	5.54	98.93	98.4	7.13	5.89	96.13	95.97	3.9	3.23	24.8	21.59	9.58	5.41	100.56	98.38	7.91	5.68	99.4	98.94	3.98	3.64	101.08	101.53	4.19	4.85	93.99	93.67
784.685	4.01	2.7	56.14	52.3	9.41	6.59	99.07	99.57	6.68	5.62	98.8	98.42	7.01	6.53	96.11	96.21	3.26	4.23	24.99	21.58	9.42	5.13	100.57	98.94	7.65	5.34	99.32	98.84	4.52	4	101.25	101.54	4.61	3.99	93.96	94.03
784.996	3.67	3.56	56.52	52.46	9.37	7.59	98.92	99.41	5.72	5.38	99.07	98.54	7.57	6.45	96.05	96.53	3.76	3.89	24.95	21.62	10.14	4.89	100.34	98.97	7.47	5.12	99.3	98.92	4.38	3.54	101.72	101.19	3.95	3.67	93.91	93.87
785.307	4.43	3.9	57.2	52.88	9.27	8.09	99.49	99.89	7.52	6.34	98.91	98.46	8.51	6.77	96.46	96.32	4.08	3.51	25	21.64	10.36	5.23	100.51	98.9	7.95	6.32	99.34	99.47	5.26	4.78	101.59	101.99	5.15	5.37	94.44	94.22
785.618	3.07	3.46	56.95	53.15	8.33	7.13	98.99	99.33	6.88	5.96	98.82	98.17	7.63	6.81	95.54	96.1	4.1	3.41	24.88	21.84	9.74	5.05	100.69	98.66	8.45	6.48	99.1	99.09	4.32	4.64	101.08	101.29	4.43	4.15	94.03	93.82
785.929	3.67	3.82	57.73	53.79	9.15	7.03	99.42	99.4	6.42	5.06	99.26	98.58	7.23	5.51	96.21	96.24	4.36	3.85	25.04	21.84	8.8	4.15	100.83	98.7	7.39	5.42	99.42	99.28	4.8	4.16	101.52	101.79	4.73	3.75	93.95	94.11
786.239	3.91	4.54	57.89	53.89	8.81	6.93	98.97	99.65	7.36	5.82	98.56	98.25	7.23	6.87	95.83	95.81	4.22	4.05	25.07	21.75	9.46	5.23	100.21	98.72	8.27	5.48	99	99.14	4.4	4.66	101.1	101.39	3.99	4.45	94.13	93.67
786.55	3.29	4.08	58.32	54.3	7.87	6.37	99.06	99.37	6.84	5.68	98.87	98.38	7.03	5.55	96.32	96.19	3.7	3.83	25.21	22.01	8.86	4.23	100.54	98.89	7.79	5.96	99.28	98.71	4.74	4.06	101.39	101.63	3.71	3.91	93.73	94.01
786.86	4.21	4.26	58.62	54.86	9.57	6.83	98.91	99.75	7.28	6	99.01	98.48	7.81	6.61	95.86	96.06	3.32	4.49	25.35	21.99	9.38	5.31	100.8	99.13	8.27	5.6	99.53	98.98	4.9	4.56	101.59	101.98	4.85	4.85	94.09	94.21
787.171	3.57	3.66	59.06	54.95	8.79	6.93	99.35	99.55	6.46	6.02	99.36	98.51	7.07	5.19	96.3	96.56	3.92	4.41	25.43	22.09	8.78	4.77	100.7	99.19	7.65	6.1	99.47	99.45	4.36	4.36	101.59	102.15	4.49	3.53	94.22	94.01
787.481	4.83	3.9	59.34	55.35	8.85	7.19	99.3	100.04	6.96	5.48	99.42	98.94	7.53	6.69	96.24	96.41	4.1	4.83	25.64	22.26	9.62	4.61	100.87	99.35	7.85	6.04	99.59	99.66	4.68	5.12	101.59	102.2	5.13	3.89	94.29	94.17
787.792	3.05	3.68	59.81	55.7	8.11	7.33	99.24	99.65	7.52	5.18	98.75	98.63	6.73	5.49	96.28	96.5	4.22	4.23	25.71	22.39	9.14	3.87	100.81	98.77	7.57	5.82	99.65	99.41	5	4.48	101.42	101.65	3.67	3.93	94.51	93.97
788.102	4.11	4.18	60.3	56.11	8.85	7.69	99.92	99.9	7.8	4.62	99.14	98.41	7.11	5.83	96.13	96.36	4.06	4.33	25.72	22.53	9.44	5.35	100.67	98.76	7.29	5.9	99.53	99.31	5.4	4.16	101.5	101.94	4.67	4.13	94.35	93.93
788.412	3.53	3.92	60.64	56.12	8.65	6.89	99.26	99.47	6.54	5.96	98.73	98.51	6.43	6.45	96.11	96.42	3.22	4.67	25.74	22.48	8.96	4.93	100.59	98.63	7.77	6.2	99.32	99.19	4.86	3.76	101.56	101.72	3.91	3.79	94.02	93.87
788.723	4.53	3.78	61.1	57.11	8.65	6.29	99.37	99.86	6.86	5.36	99.37	99.1	6.61	5.85	96.51	96.84	3.58	3.69	26.09	22.58	7.84	4.17	100.91	99.15	7.03	4.62	100.02	99.66	4.36	3.46	101.49	101.76	4.75	3.97	94.52	94.26
789.033	3.49	3.48	61.11	57.16	8.03	6.53	99.12	99.38	5.54	5.22	98.71	98.49	6.35	5.59	96.14	96.61	2.98	3.71	26	22.82	8.32	4.61	99.86	98.87	6.59	5.5	99.56	99.13	4.22	3.94	101.69	102.13	4.91	3.71	94.19	93.94
789.343	4.61	3.46	61.26	57.41	7.49	6.69	99.13	99.64	6.84	5.06	99.09	98.29	7.55	5.91	96.17	96.39	3.38	3.15	26.33	22.7	8.62	5.01	100.48	98.69	6.55	6.44	99.45	99.52	5.02	3.82	101.43	101.68	4.51	3.75	94.35	93.99
789.653	4.17	3.8	61.88	57.7	7.87	7.17	99	99.54	6.94	5.3	98.81	98.7	6.15	6.11	96.33	96.35	3.96	3.37	26.31	22.98	8.64	5.21	100.46	99.11	6.65	5.02	99.52	99.01	4.58	5.18	101.55	101.97	4.73	4.47	94.23	94.35
789.963	3.99	4.16	61.93	57.94	8.17	7.09	99.01	99.72	6.76	6.32	99.02	98.61	6.99	5.99	96.24	96.69	4.16	2.85	26.46	22.98	8.64	5.31	100.59	99.13	7.67	6.3	99.54	99.54	4.58	3.96	101.73	102.18	4.39	3.77	94.39	94.37
790.273	2.93	4.72	61.99	58.27	7.71	6.07	99.15	99.5	6.5	5.3	99.02	98.58	6.69	5.67	96.32	96.23	4.66	3.75	26.28	22.96	7.98	4.37	100.41	98.69	6.91	4.28	99.25	99.12	4.2	4.18	101.41	101.45	4.11	2.89	94	94.16
790.583	4.43	3.96	62.75	58.63	7.91	6.39	99.36	99.94	6.34	6.08	98.96	98.55	5.89	5.73	96.4	96.65	3.86	4.07	26.44	23.13	8.34	4.39	100.76	99.1	7.05	5.16	99.42	99.8	4.44	3.48	101.6	101.76	3.49	3.57	94.86	94.37
790.893	5.63	5.94	63.06	59	9.31	8.29	99.38	99.45	8.24	6.98	99.1	99.02	9.03	7.33	96.43	96.67	5.84	6.11	26.73	23.43	10.18	5.67	100.84	99	9.23	6.78	99.62	99.4	6.02	5.26	101.36	101.73	5.75	6.35	94.43	94.45
791.203	3.39	5.12	63.29	59.58	7.77	6.01	99.4	99.88	6.66	5.78	98.96	98.87	6.53	6.49	96.23	96.7	4.12	4.23	26.92	23.45	8.78	4.49	100.63	98.61	7.43	5.64	99.61	99.18	4.94	4.7	101.55	102.03	4.45	3.89	94.65	94.22
791.513	3.83	3.78	63.11	59.11	7.55	6.63	98.55	99.16	5.96	4.46	98.56	98.07	6.53	6.23	95.75	95.92	4	3.75	26.8	23.31	8.8	4.57	99.72	98.53	6.29	5.28	98.96	98.58	4.88	4.58	101.16	101.26	3.05	4.25	93.84	93.77
791.823	3.65	4.1	63.85	59.9	8.61	7.35	99.12	99.6	6.68	4.56	99.17	98.87	7.21	6.53	96.15	96.42	4.7	4.77	27.13	23.72	7.98	5.25	100.56	98.91	6.45	4.98	99.4	99.2	5.22	4.72	101.49	101.71	3.51	4.65	94.14	94.28
792.132	3.89	4.28	63.87	60.25	7.71	6.21	99.16	99.52	6.6	6.48	98.81	98.66	6.61	6.27	96.2	95.99	4.14	5.01	26.93	23.71	9.2	4.39	100.34	98.3	7.19	4.88	99.45	99.39	5.56	3.56	101.46	101.74	3.75	4.41	93.9	94.06
792.442	4.01	3.76	64.77	60.74	7.93	6.41	99.75	100.21	6.56	5.26	99.27	99.02	7.05	5.63	96.97	97.05	3.6	3.91	27.47	23.91	8.26	4.55	100.92	99.28	6.07	5.28	100.25	99.62	3.66	3.38	101.73	102	4.03	3.85	94.44	94.44
792.751	4.09	2.9	64.92	61.2	7.71	5.93	99.18	99.68	5.92	4.24	98.96	98.73	6.35	5.45	96.12	96.71	3.56	3.77	27.53	23.87	8.2	3.53	100.62	99.07	6.49	5.26	99.5	99.45	4.3	3.96	101.24	101.9	4.05	4.19	94.37	94.23
793.061	3.83	3.1	65.08	61.04	7.07	6.07	98.9	99.18	5.68	4.94	98.59	98.48	6.73	6.43	96.38	96.33	3.96	4.31	27.69	24.13	8.44	4.23	100.15	98.69	6.09	5.04	99.54	99.17	4.6	4.08	101.59	101.87	4.87	4.39	94.28	94.06
793.371	3.43	3.54	65.74	61.51	7.77	5.63	99.24	99.61	5.84	5.14	99.18	98.88	6.05	5.91	96.79	96.49	3.36	4.81	27.93	24.22	8.4	4.29	100.18	99.24	6.65	5.04	99.95	99.59	4.26	4.3	101.66	101.78	3.79	4.31	94.38	94.3
793.68	3.83	3.48	65.69	61.8	7.43	5.97	99	99.71	5.98	5.18	98.97	98.58	6.45	6.07	96.36	96.49	3.58	3.31	28	24.45	7.74	4.85	100.16	99.17	6.03	5.48	99.51	99.41	4.38	3.9	101.53	101.81	4.01	4.39	94.63	93.85
793.989	3.51	3.52	65.93	62.2	6.81	6.19	99.12	99.26	6.44	4.84	98.58	98.39	5.79	5.53	96.2	95.94	3.5	3.21	28.06	24.68	8	4.93	99.88	98.68	6.99	4.98	98.97	98.82	4.14	4.12	101.33	101.64	3.19	4.25	93.92	94.11
794.299	4.49	4.08	66.22	62.42	8.49	7.09	98.82	99.44	6.82	6.02	98.96	98.34	5.95	5.89	96.17	96.27	4.6	4.11	28.28	24.6	8	4.97	100.18	98.95	8.05	5.22	99.35	99.17	4.74	4.34	101.61	101.63	4.21	4.09	94.31	94.12
794.608	3.97	4.14	66.43	62.56	6.61	6.05	99.18	99.67	6.2	5.1	98.64	98.27	6.51	6.19	96.08	96.47	4	3.71	28.37	24.81	7.7	4.41	100.2	98.68	6.67	4.3	99.32	98.97	4.68	3.88	101.35	101.58	4.05	3.79	93.97	94.02
794.917	3.83	3.04	67.06	63.13	7.23	6.67	99.31	99.29	5.7	5.46	99.03	98.59	6.21	5.19	96.42	96.38	3.82	4.11	28.62	24.82	7.32	4.37	100.26	99.01	6.47	4.9	99.55	99.1	4.74	3.54	101.78	101.79	4.19	3.83	93.99	94.08
795.226	3.49	4.66	67.06	63.17	8.25	6.65	99.31	99.62	6.38	5.68	98.79	98.7	6.93	6.29	96.3	96.44	5.06	4.19	28.59	25.26	8.28	5.41	100.46	98.87	6.49	6.42	99.36	98.77	5.66	5	101.72	101.7	4.65	4.03	94.13	94.49
795.536	3.69	3.74	66.89	63.43	6.79	6.17	99.02	99.49	6.14	4.52	98.47	98.02	6.05	5.93	95.93	96.17	4.62	3.79	28.81	25.08	7.26	5.29	99.72	98.72	6.79	5.02	98.88	98.92	4.2	4.52	100.99	101.24	3.61	4.15	94.04	93.99
795.845	3.25	4.28	67.81	63.98	7.41	5.97	100	99.89	5.88	6.5	98.87	98.68	6.17	5.31	96.34	96.69	5.16	4.47	28.96	25.55	7.9	5.17	100.27	99.04	7.63	4.94	99.68	99.2	4.26	4.46	101.94	102.23	4.09	5.41	94.35	94.24
796.154	5.17	4.42	67.84	63.9	8.65	6.63	99.36	99.59	7.14	5.64	98.77	98.24	7.77	7.23	96.16	96.21	5.16	5.89	29.01	25.24	8.22	5.75	99.98	98.99	7.75	5.4	99.44	98.95	5.62	4.96	101.56	101.78	4.77	4.29	94.12	94.08
796.463	3.59	3.6	68.28	64.34	6.97	5.93	98.97	99.65	4.96	4.5	98.59	98.43	6.27	5.63	96.01	96.31	3.42	2.49	29.28	25.83	7.26	4.57	100.1	98.84	6.15	5.06	99.51	99.18	4.12	3.2	101.93	101.6	4.25	4.57	94.36	94.69
796.772	3.75	3.14	68.62	64.83	6.51	5.33	99.24	99.8	6.32	4.12	99.24	98.52	5.73	5.63	95.91	96.29	3.84	3.71	29.71	26.02	7.34	4.71	100.39	98.86	7.31	5.38	99.32	99.94	4.5	3.94	101.42	102.03	5.13	3.23	94.08	94.45
797.08	5.55	5.64	68.79	65.13	8.57	6.73	98.99	99.71	7.32	5.2	99	98.99	7.23	7.19	96.23	96.09	5.28	5.75	29.73	25.84	9.62	5.81	100.04	99.02	7.45	6.92	99.6	99.44	6.56	5.52	101.23	101.73	4.95	4.75	94.09	94.18
797.389	3.67	3.76	69.21	65.29	7.49	6.11	99.3	99.68	6.18	4.82	98.57	98.25	6.87	5.25	96.29	96.36	3.12	4.81	29.97	26.12	6.04	4.69	100.2	98.82	6.45	4.82	99.14	98.89	4.5	3.22	101.26	101.7	4.31	3.29	94.41	94.1
797.698	4.23	3.8	69.21	65.69	6.47	6.15	99.22	99.42	5.54	5.24	99.12	98.51	7.03	5.51	96.05	96.63	3.8	4.49	30	26.26	7.56	4.49	100.29	98.89	6.51	5.56	99.76	99.43	4.62	3.86	101.5	102.08	4.45	4.19	94.32	94.11
798.007	4.55	3.46	69.83	66.09	7.35	7.17	99.13	99.62	6.96	4.9	98.85	98.56	7.39	5.63	96.4	96.79	4.12	4.07	30.16	26.84	6.62	5.03	100.33	98.77	6.23	4.78	99.7	99.54	4.18	4.28	101.67	102.2	3.83	4.49	94.24	94.19
798.315	3.63	4.5	70.03	65.9	6.23	5.49	99.26	99.58	5.98	5.04	99.06	98.64	5.73	5.99	96.05	96.17	3.7	4.29	30.4	26.7	8.04	4.25	100.19	99.03	6.31	4.7	99.46	99.53	3.52	4.06	101.58	101.92	3.59	3.99	94.64	94.61
798.624	6.97	7.32	69.81	66.39	8.75	9.11	98.94	99.58	8.48	7.38	99.07	98.61	7.89	8.15	95.95	96.45	6.82	6.21	30.68	27.01	8.18	6.43	100.28	98.8	8.93	7.22	99.24	98.92	6.92	6.76	101.13	102.07	6.15	7.27	93.74	94.47
798.933	4.57	3.94	70.19	66.57	6.49	5.61	99.5	99.73	5.36	5.04	99.28	98.69	5.63	4.83	96.39	96.41	3.74	3.39	30.9	26.98	7.02	4.35	100.13	98.78	4.95	4.84	99.42	99.52	4	3.54	101.81	101.81	4.09	2.67	94.61	94.69
799.241	3.17	4	70.1	66.55	6.11	6.65	98.34	99.35	6.34	4.56	98.84	98.04	5.29	5.25	96.25	95.99	4.12	4.41	30.98	27.3	7.4	4.57	99.96	98.59	6.67	4.8	98.83	98.91	4.1	4.76	101.33	101.35	4.31	4.33	93.88	94.03
799.55	3.39	2.72	70.93	67.37	6.71	6.35	99.32	99.74	5.78	4.86	98.93	98.53	6.31	5.23	96.58	96.77	3.7	3.59	31.19	27.69	7.32	4.37	100.52	99	6.67	4.48	99.13	99.25	4.74	3.84	101.87	102.09	4.15	4.47	94.39	94.01
799.858	3.33	4.18	71.08	67.56	6.45	5.25	99.5	99.82	5.98	5.2	99.37	99.29	5.91	5.39	97.03	96.7	3.94	4.11	31.2	27.41	7.28	4.77	100.63	99.43	6.23	4.62	99.93	99.4	4.12	4.14	101.64	102.1	3.95	3.83	94.78	94.22
800.166	4.69	3.62	71.34	67.79	5.95	5.79	99.18	99.52	6.18	5.14	99.51	98.69	5.37	4.71	96.46	96.16	3.92	3.71	31.88	27.79	6.58	4.53	100.29	99.3	5.19	5.74	99.61	99.39	4.2	4.18	101.58	102.02	4.03	3.99	94.5	94.26
800.475	4.53	3.44	71.53	67.92	7.67	5.47	99.11	99.25	6.82	4.96	98.96	98.5	6.61	5.17	96.2	96.01	3.4	4.35	31.75	28.07	6.94	4.79	99.76	98.69	6.51	5.18	99.41	99.05	5.14	4.48	101.22	101.87	4.71	3.57	94.11	93.86
800.783	4.17	4.4	72.42	68.48	6.53	6.53	99.61	100.19	6.7	5.4	99.71	99.07	6.21	5.37	96.69	96.89	4.04	3.99	31.93	28.15	6.62	4.63	100.26	99.3	6.33	5.64	100.11	99.74	5.48	3.88	101.71	102.58	4.61	4.43	94.81	94.95
801.091	4.29	3.16	72.22	68.15	6.45	4.97	99.55	99.93	6.34	4.68	99.17	98.59	6.81	5.05	96.37	96.72	3.96	3.99	32.38	28.47	7.2	5.33	100.01	99.11	6.17	3.98	99.5	99.68	4.32	3.98	101.56	102.28	3.83	3.87	94.45	94.34
801.399	3.41	4.08	72.32	68.65	6.23	4.71	99.12	99.96	5.44	5.18	98.72	99.05	6.09	4.71	96.14	96.49	3.98	3.57	32.35	28.45	7.44	4.37	99.89	98.74	6.17	3.94	99.45	99.22	4.58	4	101.64	102.24	3.87	4.21	94.3	93.88
801.707	3.59	2.84	72.47	69.06	5.71	5.87	99.37	100.08	5.78	4.46	99.06	98.21	5.49	5.03	96.3	96.33	3.58	3.39	32.5	28.92	6.6	4.11	100.1	99.06	4.83	4.52	99.55	99.55	4.72	3.6	102.05	101.95	4.37	3.77	94.2	94.15
802.015	4.15	4.04	73.11	69.11	7.09	5.39	99.38	99.4	5.26	5.72	98.83	98.53	6.11	5.21	96.19	96.3	3.22	4.45	32.96	28.9	6.68	4.05	100.28	99.11	5.83	5.02	99.19	99.14	4.98	3.26	101.58	101.85	4.41	4.49	94.16	94.35
802.323	4.23	4.48	72.87	69.03	6.57	5.77	98.64	99.56	6.52	5.76	98.83	98.54	6.83	5.85	95.85	95.75	4.08	4.43	33.21	29.2	6.9	4.33	99.62	98.85	5.63	4.52	99.01	98.55	3.64	4.38	101.43	101.97	4.13	3.91	94.01	94.04
802.631	4.49	4.66	73.17	69.86	6.23	6.55	99.3	99.83	5.06	4.92	99.29	98.51	5.41	5.65	96.25	96.38	3.6	3.41	33.12	29.37	6.22	3.57	99.87	98.76	5.09	4.44	99.49	99.25	3.56	3.74	101.48	101.95	3.75	3.19	93.84	94.18
802.939	4.05	4.4	73.37	70.11	6.99	6.79	99.43	99.63	6.12	4.88	99.05	99.02	6.01	5.45	96.33	96.7	5.32	4.47	33.68	29.71	6.14	4.11	100.27	99.17	5.97	4.44	99.96	99.55	4.68	4.8	102	101.89	4.43	4.25	94.35	94.47
803.247	4.91	4.12	73.33	69.63	5.97	6.53	98.76	99.13	6.08	5.04	98.56	98.27	5.53	5.67	95.91	96	4.04	4.89	33.25	29.34	6.86	5.65	99.37	98.57	6.97	4.58	99.18	98.82	4.36	4.68	101.5	101.84	4.21	4.81	93.62	93.45
803.555	5.05	3.48	74.17	70.39	6.79	6.29	99.1	99.28	6.3	4.78	98.89	98.38	4.95	5.45	96.54	96.45	4.98	4.15	33.91	30.23	6.66	4.89	99.68	98.96	6.35	5.34	99.68	99.31	5.3	4.62	101.53	101.88	4.79	3.77	94.06	94.26
803.863	2.95	4.4	74.04	70.39	6.65	4.31	98.82	99.38	4.8	5.06	98.78	98.53	5.51	5.23	96.05	96.23	3.34	3.51	33.96	30.46	6.94	4.97	99.46	99.21	5.35	4.92	99.47	99.28	4.3	4.48	101.35	102.06	3.83	3.61	94.21	94.34
804.17	3.17	3.78	73.98	70.57	6.51	5.67	98.81	99.31	5.46	4.96	98.74	98.07	5.65	5.37	95.97	95.88	3.74	4.69	34.3	30.46	6.6	3.91	99.9	98.81	5.77	5.14	98.86	99.14	4.54	4.74	101.09	101.61	3.17	3.75	93.55	93.79
804.478	4.51	4.14	74.6	71.25	7.33	6.05	99.23	99.43	5.92	5.26	98.84	98.41	6.13	4.51	96.43	96.55	4.68	3.57	34.49	30.77	7.18	4.73	99.86	99.01	5.99	4.72	99.38	98.98	4.72	4.06	101.84	101.79	3.19	3.35	94.64	93.77
804.786	4.61	3.42	75.16	71.05	6.95	5.71	99.24	99.41	5.58	5	98.91	98.85	6.53	5.71	96.54	96.47	4.08	4.37	34.94	31.14	7.1	4.87	100.08	98.88	6.03	5.58	99.48	99.33	5.22	4.12	101.78	101.96	3.67	4.49	94.58	94.36
805.093	3.91	3.8	75.39	71.8	5.33	5.05	99.74	100.14	5.2	4.36	99.6	99.35	5.41	4.79	96.57	97.11	3.54	3.13	35.42	31.35	7.32	4.79	100.67	99.28	6.31	3.9	99.48	99.9	4.58	3.44	102.61	102.56	3.33	3.77	94.73	94.62
805.401	5.07	3.58	75.42	71.34	5.89	5.57	99.19	99.81	6.38	4.32	99.36	98.98	5.81	5.05	96.41	96.78	4.02	4.37	35.24	31.27	6.3	4.75	100.1	98.8	6.07	4.6	99.71	99.56	3.8	4.48	101.93	101.84	4.37	4.23	94.18	94.3
805.708	2.91	3.54	74.96	71.45	6.73	5.29	98.98	99.33	4.7	4.8	98.19	98.72	5.01	5.37	96.05	96.01	3.14	3.47	35.21	31.22	6.12	4.39	99.62	99.05	5.49	5.12	99.07	98.93	4.18	3.08	101.57	101.64	3.69	3.65	94.06	93.82
806.015	4.09	3.52	75.62	71.97	6.63	5.83	99.17	99.53	6.22	5.82	98.55	98.54	6.47	5.27	95.94	96.97	4.14	4.15	35.96	31.61	7.18	5.09	99.78	99	5.41	5.58	99.45	99.46	3.98	4.84	101.56	101.84	4.77	4.01	94.01	94.38
806.323	3.17	3.3	75.72	72.39	5.71	5.43	99.09	100	5.22	4.7	99.08	98.85	5.17	5.39	96.23	96.67	4.04	3.79	36.13	31.93	5.86	4.61	99.63	98.96	5.25	3.92	99.59	99.07	4.66	3.6	101.79	101.87	4.13	4.19	94.24	94.48
806.63	4.29	4.4	75.98	72.13	5.89	5.41	98.97	99.54	5.92	4.96	98.48	98.9	6.35	4.75	96.71	96.27	3.96	4.27	36.41	32.27	6.28	4.05	99.64	98.99	5.47	4.22	99.23	99.04	4.38	4.28	101.44	101.5	4.47	4.33	94.3	94.02
806.937	3.85	4.02	76.05	72.91	6.01	4.75	99.39	99.76	4.56	5.86	98.6	98.6	5.59	5.75	96.36	96.61	4.1	3.13	36.58	32.75	6.84	3.57	99.73	98.98	5.53	4.16	99.41	99.09	3.72	3.4	101.98	101.8	4.53	3.13	94.5	94.1
807.244	3.43	4.26	76.38	72.78	6.45	6.25	99.52	99.78	6.04	5.54	98.96	99.32	5.33	4.79	95.98	96.51	4.02	4.61	36.87	32.65	6.48	3.85	100.22	99.09	5.39	5.24	99.26	99.4	4.28	4.08	101.7	102.35	4.17	3.19	94.13	93.69
807.552	3.61	3.14	76.91	73.38	6.19	6.91	99.83	99.98	5.94	5.24	99.33	98.9	5.59	5.79	96.68	96.69	3.3	4.01	37.37	33.12	6.2	4.37	99.94	99.15	6.41	4.18	100.08	99.56	4.52	4.04	101.94	102.37	3.97	3.93	94.82	94.72
807.859	4.55	3.86	76.47	73.02	5.89	6.65	99.08	99.8	6.78	5.5	99	98.53	5.93	5.13	96.26	96.23	4.76	4.09	37.1	32.96	7.56	4.65	99.8	98.75	5.59	5.6	99.41	99.28	4.44	4.72	101.63	102.05	3.57	4.61	94.28	94.24
808.166	3.75	3.44	76.83	74.07	6.39	5.23	99.63	100.03	5.32	4.84	99.17	98.74	4.89	4.81	96.27	96.72	4.28	3.35	37.08	33.53	5.98	4.69	99.5	98.76	5.71	4.56	99.72	99.56	4.16	4.02	102.02	102.13	3.03	3.41	93.9	94.16
808.473	4.19	4.38	76.93	73.56	6.61	6.03	99.27	99.65	6.26	5.76	98.79	98.6	5.03	4.49	96.02	96.43	4.68	5.07	37.93	33.78	6.04	4.01	99.69	98.67	6.13	5.68	99.2	99.49	4.46	4.16	101.21	102.19	4.43	4.23	94.2	94.16
808.78	4.07	4.48	77.64	74.17	6.41	5.15	99.83	100.59	5.5	4.64	99.29	99.3	5.33	4.61	96.69	97.37	4.3	4.43	38.36	34.3	5.84	4.57	100.25	99.65	6.19	4.76	100.07	100.1	3.98	3.86	102.69	102.73	4.47	4.31	94.68	94.7
809.086	3.49	4.3	77.64	74.21	5.25	5.93	99.32	99.56	5.92	5.06	99.02	98.68	6.07	4.85	96.15	96.52	3.64	3.99	38.33	33.93	6.44	4.33	99.84	98.45	5.75	4.62	99.75	99.48	3.92	3.9	101.53	102.14	4.37	4.09	94.08	94.27
809.393	4.79	3.7	77.75	74.7	6.37	5.15	99.46	99.93	5.9	4.72	98.83	98.89	5.69	5.31	96.44	96.9	3.66	4.13	38.4	34.63	5.82	4.23	99.68	99.31	5.53	4.78	100.01	99.96	4.1	3.74	102.31	102.18	4.55	4.37	94.72	94.42
809.7	4.43	4.24	77.82	74.14	6.05	5.81	98.92	99.88	6.32	4.8	98.96	98.58	6.03	5.81	96.32	96.9	3.62	4.61	38.38	33.94	6.72	5.31	99.31	99.06	6.07	5.4	99.24	99.18	5.58	3.66	101.78	102.3	4.33	5.47	94.55	94.18
810.007	4.23	4.22	77.76	74.52	5.91	4.55	98.81	99.69	4.72	4.7	98.88	98.53	5.39	4.69	96.16	96.6	3.76	3.31	38.89	34.47	5.94	3.97	99.37	99.09	4.91	5.16	99.11	98.86	3.8	3.32	101.42	101.89	3.87	4.13	94.12	94.08
810.313	3.81	3.36	78.48	75.4	6.03	5.15	99.55	100.38	5.56	4.08	98.85	99.21	5.41	4.59	96.63	96.62	3.62	3.79	39.6	35.34	5.96	4.31	99.96	99.45	4.95	4.72	99.72	99.63	3.1	4.1	101.88	102.71	4.25	3.23	94.3	94.53
810.62	4.27	3.3	78.88	75.55	5.17	4.93	99.63	99.94	5.28	5.38	99.58	98.91	5.21	5.11	96.51	97.21	3.86	4.15	39.76	35.43	5.52	4.69	100.14	99.48	5.25	4.36	99.9	99.88	4.62	3.86	102.25	102.51	4.05	4.37	94.87	95.03
810.926	4.03	3.54	78.77	75.67	5.65	5.43	99.27	99.57	5.56	5.52	98.88	98.36	6.13	5.47	96.3	96.79	3.34	3.85	39.82	35.69	5.76	4.69	99.89	98.84	5.43	4.34	99.5	99.65	4.54	3.58	101.69	101.91	3.75	4.09	94.35	94.4
811.233	4.19	4.22	78.69	75.68	6.47	5.81	99.4	100.09	4.9	4.74	98.87	98.93	4.97	5.99	96.5	96.42	3.98	4.33	39.69	35.74	5.72	4.81	99.88	99.32	6.43	3.7	99.5	99.69	3.88	3.32	101.93	102.35	4.29	2.99	94.38	94.56
811.539	4.13	4.5	78.79	75.57	6.81	5.77	99.61	99.88	4.96	4.48	99.14	98.59	5.45	5.15	96.44	96.44	4.12	4.11	40.08	35.97	6.22	4.81	99.8	99.12	5.93	5.28	99.39	99	4.12	4.84	101.99	102.35	3.59	4.31	94.38	94.33
811.846	3.73	4.5	78.99	75.65	6.07	5.15	99.14	100.03	5.12	5.2	99.74	98.98	5.45	5.01	96.35	96.76	3.64	3.91	40.3	36.38	5.64	4.65	99.82	99.34	5.07	4.22	99.46	99.35	4.42	3.46	102.03	102.13	3.13	3.57	94.42	94.16
812.152	3.71	4.02	78.75	75.61	6.47	4.73	98.72	99.55	5.1	4.86	98.77	98.2	5.79	4.95	96.01	95.78	4.38	3.67	40.54	36.43	6.28	4.01	99.31	99.17	4.89	4.38	99.35	98.93	4.46	4.44	101.52	102.16	4.07	3.85	94.19	93.88
812.458	3.59	3.42	79.31	76	5.85	5.27	98.76	99.82	5.22	4.76	98.48	98.56	5.91	5.35	96	96.55	2.82	4.11	40.94	36.48	6.5	4.31	99.9	99.09	5.69	3.8	99.58	98.83	4.02	3.76	101.6	101.87	4.43	4.11	94.19	93.78
812.765	3.17	3.4	79.02	75.87	5.69	5.13	98.59	99.27	6.04	4.62	98.48	98.44	5.09	4.81	96.15	96.23	4	4.53	41.16	36.96	6.5	4.67	99.18	98.48	5.63	5.08	98.99	98.41	4.92	3.98	101.31	101.78	3.95	4.57	93.75	93.72
813.071	3.95	3.82	79.5	76.16	6.07	5.11	98.78	99.43	4.82	5.36	98.51	98.26	5.55	3.97	95.83	96.29	3.86	3.81	41.4	37.33	5.82	4.37	99.66	99.19	5.63	4.06	99.38	98.86	3.64	3.7	101.29	101.86	4.35	3.97	93.81	94.19
813.377	3.19	4.32	79.78	76.48	5.65	4.73	99.42	99.38	5.22	3.82	98.95	98.45	5.57	5.41	95.89	96.15	4	4.31	41.7	37.61	6.58	4.93	99.7	99.11	5.73	4.72	99.7	99.21	4.04	3.64	101.9	101.91	4.59	4.27	94.33	94.22
813.683	3.91	3.32	80.48	77.5	5.29	4.73	99.48	99.93	4.42	4.34	99.07	98.94	5.33	4.59	96.58	96.73	3.86	4.01	42.48	37.95	5.84	4.33	100.02	99.25	4.97	4.12	100.03	99.83	3.78	3.16	102.21	102.78	3.85	4.09	94.3	94.78
813.989	4.99	4.64	79.87	77.04	6.19	5.87	99.22	99.56	5.5	4.96	98.8	98.69	6.21	4.97	96.42	96.31	3.64	4.21	42.17	37.99	5.86	3.43	99.1	98.75	5.51	4.76	99.63	99.18	4.28	3.72	101.53	102.31	4.71	3.79	93.76	94.25
814.295	4.45	3.64	80.41	77.51	6.41	4.53	99.49	100.27	4.78	4.6	99.27	98.83	4.79	4.75	96.4	96.63	3.36	3.69	42.68	38.51	5.82	3.83	99.37	99.48	4.59	4.12	99.73	99.58	3.88	3.78	102.18	102.43	4.75	3.95	94.24	94.3
814.601	3.69	4.1	80.68	77.27	4.89	4.45	98.76	100.11	5.34	4.88	99.26	98.9	5.45	4.55	96.38	96.27	3.72	4.03	42.75	38.83	5.32	4.09	99.91	99.4	5.31	4.74	99.44	99.4	4.5	4.6	101.8	102.4	4.45	3.75	95.03	94.47
814.907	4.11	4.02	80.38	77.44	5.77	5.01	99.55	99.56	5.62	4.68	99.08	98.55	4.95	4.81	95.94	96.93	3.34	4.01	43.15	38.89	4.9	4.37	99.5	98.98	5.27	3.64	99.57	98.92	4.32	3.64	101.51	102.55	3.89	3.81	94.24	94.18
815.213	3.59	3.1	80.9	77.68	5.45	5.17	99.3	99.64	5.32	4.12	99.22	99.22	5.91	4.67	96.35	96.78	3.3	3.49	43.34	39.1	5.78	3.65	99.39	99.63	5.23	3.36	99.42	99.8	4.5	3.88	101.79	102.3	4.75	2.97	94.35	94.72
815.518	4.09	4.72	81.04	77.92	6.27	5.29	98.94	99.29	5.36	5.2	98.8	99.03	5.41	4.57	96.49	97.01	3.86	4.39	43.47	39.18	6.32	4.11	99.97	99.21	5.77	4.5	99.84	99.2	4.82	3.68	101.59	102.09	3.79	4.29	94.37	94.35
815.824	3.67	4.48	80.44	77.58	5.89	4.95	99.11	99.25	4.78	4.16	98.67	98.92	4.75	4.73	96.1	96.2	4.1	4.01	43.62	39.43	6.18	3.97	99.78	98.89	5.61	4.54	99.15	99.53	4.12	3.92	101.96	102.01	4.61	4.21	94.34	94.11
816.13	3.85	4.5	81.21	77.86	5.69	5.01	99.09	99.5	5.66	4.5	98.76	98.91	5.57	5.37	96.13	96.28	4.6	4.97	44.16	39.78	5.96	4.69	99.94	98.67	5.49	4.36	99.09	99.05	4.14	4.78	101.66	102.25	4.39	3.83	94.24	94.24
816.435	3.87	4.58	81.3	78.34	5.75	4.67	99.74	99.76	6.22	5.3	99.24	98.7	4.79	4.85	96.41	96.74	4.64	4.49	44.36	40.12	6.64	4.87	99.63	99.13	5.73	4.72	99.05	99.92	5.06	4.82	101.85	102.14	4.49	3.89	94.14	94.71
816.741	4.07	3.22	82.24	78.99	6.01	4.81	99.2	100.05	5.82	4.56	98.94	99.11	4.85	4.51	96.68	96.76	3.48	4.01	44.86	40.38	4.54	4.49	100.06	99.35	5.65	5.06	99.78	99.39	3.82	3.86	102.24	102.38	3.97	3.93	94.74	94.51
817.047	4.57	3.58	81.91	78.83	5.29	5.79	99.39	100.13	5.56	4.84	99.14	98.78	5.33	4.89	96.46	96.47	4.16	3.25	45.05	40.87	6.2	4.13	99.95	99.22	5.13	4.78	99.78	99.59	3.72	3.84	102.04	102.5	4.17	4.33	95.07	94.84
817.352	4.15	4.22	81.9	78.79	5.39	5.33	99.19	99.86	4.88	4.5	99.12	98.43	5.21	4.59	96.82	96.74	4.14	3.79	45.29	40.89	5.78	4.39	99.56	99.6	5.25	4.02	98.92	99.59	3.44	3.28	101.96	102.5	3.91	3.31	94.26	93.98
817.657	4.01	3.38	82.05	79.07	5.19	4.67	98.6	99.42	4.46	4.04	99.08	98.89	5.01	5.37	96.52	96.29	3.14	4.05	45.74	41.07	5.42	3.71	99.51	99.01	5.93	4.74	99.51	99.26	4.48	3.3	101.67	101.88	4.07	3.27	94.69	94.51
817.963	3.77	3.12	81.36	78.9	5.47	5.19	98.79	99.34	4.42	3.86	98.19	98.07	5.89	4.57	95.88	96.28	3.06	3.59	45.69	40.83	4.94	4.13	98.87	98.29	5.07	3.54	99.12	98.73	3.9	3.48	101.36	101.38	4.05	3.77	94.1	94.24
818.268	3.89	3.82	81.99	78.96	5.87	5.13	98.82	99.43	5.7	5.92	98.89	98.54	4.87	5.57	96.19	96.42	3.72	5.17	46.03	41.74	6	4.59	99.28	99.32	5.11	4.8	98.99	99.53	4.12	4.62	101.53	102.19	5.07	4.09	93.94	94.05
818.573	5.15	5.04	82.54	79.41	5.85	5.61	99.72	99.39	6.08	6.06	99.05	98.7	5.03	4.59	96.41	96.84	3.6	4.33	46.41	42	6.04	5.19	99.62	99.32	4.65	5.06	99.4	99.78	4.42	5.76	102.27	102.2	4.35	4.27	94.09	94.31
818.878	3.61	3.72	82.52	79.61	5.49	5.29	99.43	100.49	4.9	4.04	99.73	99.26	4.13	5.15	96.69	96.91	3.98	3.69	47.42	42.41	5.3	3.85	99.98	99.54	4.85	3.9	99.89	99.51	3.78	4.88	102.1	103.26	4.49	3.53	94.74	94.45
819.184	3.79	4.08	82.58	79.52	5.27	4.43	99.84	99.46	4.56	4.5	99.15	98.49	5.15	5.65	96.48	96.7	3.92	4.81	47.15	42.55	5.28	4.67	99.64	99.09	5.39	5.3	99.43	99.52	4.26	3.84	102.12	102.07	3.59	4.45	94.5	94.11
819.489	4.09	4.2	81.82	79.76	5.65	4.93	98.73	99.34	4.52	5.14	98.39	98.15	5.23	5.73	95.94	96.02	3.48	3.67	47.26	42.42	6.06	4.59	98.69	98.74	4.87	3.78	98.75	98.94	4.98	4.48	100.93	101.2	3.87	4.05	94.11	94.1
819.794	3.13	3.46	83.17	80.2	5.15	4.93	99.27	99.56	5.18	3.92	98.77	98.69	4.21	4.43	96.31	96.48	3.8	3.97	47.56	43.21	4.4	3.65	99.85	99.13	4.89	3.98	99.53	99.5	4.64	3.44	101.32	102.36	3.13	4.01	94.8	94.42
820.099	5.95	6.7	82.48	79.68	7.57	7.45	98.59	98.5	7.58	7.38	98.57	98.21	7.75	6.47	95.58	95.71	5.4	6.13	47.43	42.72	7.86	6.53	98.93	99.07	7.45	6.72	98.63	98.74	7.2	7.58	100.86	101.6	6.07	6.61	93.93	93.44
820.404	3.91	4.18	83.21	80.84	4.69	4.85	99.2	99.73	4.88	5.4	99.26	98.86	4.37	4.41	96.5	96.49	3.64	4.19	48.29	43.86	3.84	3.79	99.67	99.38	4.87	4.98	100.01	99.45	4.46	4	102.28	102.17	2.93	3.89	94.16	94.29
820.709	2.97	3.9	83.28	81.02	5.23	5.49	99.62	99.64	5.46	4.8	99.02	99.06	5.19	3.59	96.26	96.44	4.54	3.65	48.48	43.67	5.64	4.35	99.54	98.97	4.89	4.44	99.56	99.77	4.18	3.78	102.2	102.48	3.63	4.51	94.43	94.85
821.013	4.01	3.82	83.2	80.6	5.19	5.01	98.65	99.71	5.5	5.6	98.85	98.9	4.53	3.87	96.43	96.14	3.86	3.87	48.45	43.96	5.96	3.79	98.94	98.78	5.15	5.02	99.57	99.15	4.28	4.18	101.33	102.25	3.87	3.67	94.05	94.21
821.318	3.39	3.7	83.71	80.71	5.29	5.25	99.28	100.13	5.8	4.32	99.25	99.11	4.17	4.37	96.39	96.35	3.52	3.65	49.24	44.35	6.14	5.03	99.15	99.36	5.19	4.8	99.97	99.55	3.98	3.78	102.31	102.73	4.63	3.99	94.15	94.76
821.623	4.07	3.96	83.57	80.7	4.67	5.13	99.48	100.03	5.48	4.22	99.44	99.1	5.25	4.87	96.35	96.48	3.58	4.21	48.95	44.82	5.28	5.27	99.11	98.73	4.75	4.52	100.1	99.24	3.72	3.96	102.32	102.43	4.63	3.51	94.29	94.49
821.928	3.51	3.42	83.29	80.47	5.19	5.57	98.56	99.54	4.56	3.94	99.32	98.13	5.13	4.57	95.71	96.22	3.9	3.87	49.37	44.57	5.58	3.69	98.93	99.05	4.95	3.66	99.37	99.39	3.64	3.02	101.29	101.49	3.87	4.01	94.08	93.64
822.232	4.57	3.54	83.56	80.84	5.49	5.63	98.89	99.13	4.8	5	98.73	98.54	4.69	5.35	96	96.14	3.96	4.23	49.53	44.87	5.72	5.29	99.22	98.49	5.31	3.6	99.32	99.09	5.04	4.2	101.84	102.28	5.07	4.53	94.03	94.25
822.537	3.67	3.72	84.08	81.31	5.19	4.61	99.1	99.53	5.1	4.3	99.95	99.29	5.57	4.65	96.65	96.65	3.66	3.17	50.12	45.59	5.62	4.59	99.25	98.99	6.33	4.3	99.48	99.57	3.76	4.04	101.97	102.88	4.35	3.77	94.26	94.68
822.841	4.27	2.86	84.13	81.11	5.33	4.99	99.29	99.54	5.26	4.26	98.99	98.49	4.55	3.15	96.49	96.58	3.54	3.93	50.18	45.71	4.32	4.01	99.28	98.88	4.93	4.14	99.61	99.52	4.3	3.84	101.85	102.4	3.47	4.19	93.87	94.25
823.146	3.23	3.48	83.52	81.55	5.35	5.85	98.85	99.82	5.24	4.3	99.29	98.85	4.95	4.77	96.48	96.52	3.7	3.39	50.78	46.02	4.62	3.85	99.28	98.88	5.19	3.92	99.3	99.16	4.84	4.26	101.76	102.14	3.97	2.59	94.45	94.38
823.45	4.39	4.14	84.15	81.46	4.93	5.95	99.41	99.77	5.22	4.86	98.88	98.86	5.01	4.59	96.48	96.97	3.8	3.27	51.04	46.37	4.94	3.79	99.65	99.16	4.37	3.3	99.74	99.46	4.2	2.9	101.69	102.05	2.91	3.15	94.49	94.37
823.754	3.61	4.56	83.87	81.67	5.37	4.95	98.84	99.56	5.04	4.64	98.7	98.71	4.91	5.15	96.12	96.85	4.54	3.43	51.2	46.7	5.82	4.45	99.28	98.96	5.55	3.9	99.46	98.83	3.94	3.92	101.51	101.9	3.97	3.43	93.73	94.31
824.059	4.01	4.72	83.98	81.51	4.69	5.25	98.75	99.51	5.06	4.92	99.23	99.02	4.09	4.11	96.14	96.33	4.18	3.73	51.41	46.7	4.98	4.23	98.92	98.58	5.51	3.8	99.34	98.74	3.98	3.76	101.59	102.26	4.01	4.09	94.2	93.52
824.363	3.63	3.98	84.29	81.99	4.65	5.25	99.92	99.9	4.74	4.6	99.59	98.91	4.47	5.05	96.85	97.07	4.04	3.65	51.82	47.1	5.2	4.37	99.29	99.36	4.95	3.74	99.46	99.93	4.24	4.42	102.04	102.17	3.87	3.97	94.47	94.19
824.667	3.47	3.28	84.51	82.28	5.43	5.19	98.87	99.78	4.62	4.48	99.31	98.83	4.01	5.09	96.24	96.57	3.78	4.13	51.87	47.47	5.12	4.21	99.26	98.51	5.01	5.02	99.19	99.38	3.84	3.96	102.34	101.89	3.27	3.31	94.38	94.41
824.971	3.61	3.68	84.58	82.28	5.31	5.29	99.34	99.6	5.26	4.64	98.62	98.71	4.91	4.17	96.27	96.4	4.32	3.23	52.07	47.07	4.6	3.59	99.23	99.25	3.77	3.86	99.55	99.55	5.1	4.28	101.89	102.49	3.65	3.57	94.25	94.46
825.275	4.01	3.24	84.99	82.12	5.07	4.61	99.02	99.74	4.84	3.74	98.73	98.39	5.07	4.73	96.38	96.39	4.22	3.21	52.4	47.5	5.16	3.91	99.51	99.49	4.75	3.88	99.5	99.71	4.32	2.98	102.1	102.68	4.73	3.37	94.42	94.44
825.579	4.21	4.1	84.35	82.12	5.39	4.25	99.08	99.49	5.26	4.76	98.65	98.81	5.35	3.75	96.16	96.25	4.58	3.63	52.72	47.7	4.76	4.55	98.98	99.02	4.91	4.38	99.18	98.99	2.92	3.14	101.52	102.05	3.41	3.69	93.89	94.27
825.883	3.91	3.74	85.32	82.55	5.13	4.15	98.83	99.68	5.18	4.14	98.89	98.12	4.69	4.25	96.45	96.46	3.94	3.63	53.15	48.71	4.82	4.09	99.32	99.25	4.63	3.48	99.8	99.44	4.44	3.46	102.16	102.64	3.53	3.79	94.38	94.39
826.187	2.99	3.98	85.13	82.61	5.09	4.83	99.38	99.66	4.22	4.42	99.39	99.07	3.83	4.87	96.35	97.01	3	3.71	53.46	49.07	4.72	3.69	99.66	99.94	5.19	3.52	99.86	99.81	4.14	3.26	102.49	102.47	3.71	4.07	94.63	95.24
826.491	3.61	3.46	84.73	83.37	4.93	4.85	99.19	99.36	4.92	4.44	98.87	98.17	5.49	3.93	96.13	96.54	4.1	4.07	53.79	48.68	5.16	3.89	98.92	98.77	5.23	4.98	99.49	99.5	3.42	4.3	101.88	101.8	3.97	4.51	94.37	94.52
826.795	3.11	3.94	84.76	82.2	5.19	4.35	98.78	99.28	4.3	4.86	98.75	98.67	4.79	4.93	96.25	96.1	4.02	3.39	53.72	48.77	5	3.01	99.25	99.01	4.79	4.6	99.01	99.41	3.18	3.4	101.57	101.96	4.59	3.19	93.92	93.89
827.099	4.25	3.98	85.87	83.15	5.53	5.47	99.5	99.83	5.52	4.58	99.15	98.88	4.65	5.09	96.8	97.27	4.22	4.45	54.43	49.93	5.46	4.05	99.55	99.61	4.89	4.34	99.62	99.86	5.08	3.96	102.61	102.34	4.53	4.13	94.57	94.79
827.403	3.89	4.5	85.04	82.51	5.61	4.79	98.77	99.52	4.54	4.84	99.1	98.66	4.93	4.27	96.42	96.5	3.34	4.07	54.5	49.75	5.44	4.33	99.02	99.67	5.11	4.68	98.99	99.61	3.48	4.3	101.52	101.82	3.47	4.09	93.64	93.79
827.706	3.65	3.72	85.89	82.52	5.45	5.83	99.48	100.02	5.18	4.94	98.86	98.9	4.93	5.11	96.08	96.94	4.4	3.77	54.79	50.05	5.08	3.93	99.35	99.74	4.47	3.42	99.4	99.58	4.56	3.74	102.1	102.71	4.17	4.39	94.78	94.42
828.01	3.69	4.88	85.4	82.61	5.57	4.87	99.8	99.82	5.86	5.04	98.84	98.6	5.05	5.23	96.21	97.01	4.5	3.67	55.45	50.21	6.02	4.13	98.92	98.82	4.97	4.1	99.27	99.15	4.94	3.3	102.33	102.15	4.31	3.57	94.32	94.84
828.313	4.17	4.1	85.05	83.38	5.15	5.01	98.44	99.62	5.44	4.52	99.07	98.26	4.75	3.87	96.35	96.5	3.98	3.83	55.31	50.25	4.36	4.05	99.27	99.03	4.53	4.44	98.89	99.1	3.74	4.18	101.77	102.14	3.71	3.11	94.21	93.64
828.617	4.13	4.36	85.92	83.49	5.03	5.33	99.22	99.32	4.6	3.98	99.21	98.92	4.87	4.19	96.19	97.12	4.54	4.11	55.86	50.69	5.02	4.33	99.38	99.16	4.95	4.22	99.67	99.47	4.26	4.2	101.91	102.47	4.49	3.61	94.4	94.09
828.92	3.77	3.24	85.26	83.38	4.67	4.63	98.94	99.7	4.4	4.28	98.84	98.43	5.17	4.13	96.82	96.14	3.98	4.09	56.02	50.92	5.22	4.25	99.61	98.6	4.03	4.56	99.19	99.03	3.78	4.18	101.68	101.83	3.57	3.81	94.09	94.19
829.224	4.35	4.8	85.43	83.3	4.79	5.83	98.7	99.45	5.52	6.12	99.14	98.72	5.31	4.99	95.79	96.16	4.22	3.67	56.11	51.1	5.26	5.05	98.96	99.15	5.51	4.36	99.47	98.61	4.74	4.56	101.73	102.13	4.05	4.33	94.45	94.04
829.527	4.05	4.24	85.33	83.36	5.31	4.61	98.42	99.86	4.98	4.86	98.65	98.5	4.85	4.75	95.99	96.15	3.96	4.03	56.08	51.4	5.24	4.15	98.64	99.15	5.69	4.22	99.18	99.46	4.02	4.54	101.66	101.51	3.91	4.23	94.09	94.33
829.83	5.37	4.02	85.97	83.63	5.37	4.63	99.37	99.66	5.78	4.94	98.52	98.66	4.37	4.35	96.13	96.96	4.12	3.73	56.38	51.46	5.4	4.69	99.66	99.42	4.99	4.82	99.64	99.51	5	4.72	102.27	102.35	4.99	4.23	93.89	94.48
830.134	3.97	3.08	86.77	84.17	4.45	4.31	99.7	99.73	5.02	3.54	99.53	98.83	4.89	4.79	96.41	97.37	3.7	3.99	57.09	52.22	4.88	4.21	99.45	99.04	5.35	4.28	99.16	100.04	3.82	3.64	102.2	102.47	3.71	3.67	94.45	94.83
830.437	4.13	3.88	86.6	83.71	5.39	4.43	98.77	99.67	4.94	5.02	98.74	98.33	4.55	4.87	95.98	96.41	4.24	3.59	57.05	52.17	4.98	4.47	99.07	98.93	4.55	3.82	99.43	99.38	4.74	3.46	101.79	102.59	4.51	4.21	94.18	94.15
830.74	3.47	3.06	86.2	83.5	5.29	5.25	98.95	99.61	4.96	4.28	98.81	98.28	4.39	4.95	95.66	96.34	3.46	3.73	57.29	52.06	5.12	4.19	99.26	98.91	4.69	5.06	99.43	99.34	3.66	4.36	101.92	102.14	4.41	4.25	94.24	94.12
831.043	5.47	5.5	85.8	83.97	7.13	7.01	98.39	99.24	6.86	6.82	98.51	98.45	7.43	6.37	96.2	95.81	5.74	5.45	57.2	52.55	6.84	5.83	98.67	98.58	6.47	5.68	99.04	98.89	5.58	5.46	101.18	101.79	6.41	5.61	93.99	94.09
831.346	4.25	5	86.65	84.31	4.25	4.69	99.37	99.87	5.64	4.4	98.76	99.16	5.25	3.95	96.77	96.79	4.1	4.73	58.2	53.29	5.1	3.83	99.8	99.15	5.23	4.52	100.29	99.23	4.14	3.68	102.14	102.99	4.35	3.47	94.69	94.68
831.649	3.89	3.26	86.48	84.01	5.25	4.53	98.63	98.97	4.7	5.04	98.52	98.69	5.09	5.47	96.23	96.42	3.98	4.31	57.99	52.81	5.24	4.43	98.68	98.89	5.79	3.26	99.04	99.45	4.2	3.54	101.3	101.73	3.11	3.15	94.18	94.06
831.952	3.45	3.9	86.98	84.07	4.43	5.21	99.06	99.72	5.46	4.26	99.06	98.26	4.45	3.95	96.05	96.77	3.52	3.61	58.87	53.36	4.5	3.99	98.95	98.93	4.57	4.56	99.35	99.4	5.48	3	102.32	102.37	3.51	3.83	94.4	94.54
832.255	4.05	3.64	86.78	84.49	5.57	4.95	99.19	99.74	5.1	4.94	99.12	98.5	5.49	5.41	96.33	96.56	4.18	4.43	58.84	54.12	5.34	5.05	98.98	99.35	5.73	4.24	99.17	99.23	4.7	4.22	101.9	101.93	4.51	4.65	94.41	94.87
832.558	5.83	6.32	86.46	83.74	6.79	7.25	98.57	99.21	7.88	6.84	98.71	98.66	6.35	6.51	96.17	96.09	6.44	5.87	59.11	53.84	7.14	6.39	99.11	98.31	7.07	7.26	99.26	98.75	7.3	6.06	101.36	102.69	5.99	6.39	94.06	94.19
832.861	3.77	4.1	86.74	83.84	5.49	5.81	98.62	99.83	4.46	4.6	98.8	98.26	5.13	5.21	96.2	96.08	3.62	4.35	59.03	54.34	5.16	3.91	98.82	98.72	4.95	4.36	99.55	98.89	4.64	4.46	101.36	102.34	4.53	3.97	94.22	94.18
833.163	3.51	3.82	86.89	84.57	5.35	4.95	99.07	99.86	4.68	4.58	99.04	98.25	4.13	4.53	96.52	96.5	4.86	4.93	59.95	54.89	5.12	4.13	98.98	99.28	5.47	4.86	99.44	99.35	4.18	4.66	102.3	102.13	4.01	4.79	94.6	94.27
833.466	4.19	3.44	87.22	84.96	5.31	4.91	98.58	99.78	4.76	4.36	99.05	98.63	4.65	3.73	96.75	96.46	4.22	3.43	59.96	54.87	5.22	3.95	99.23	98.81	4.17	4.5	99.85	99.13	4.72	3.22	101.69	102.61	3.19	4.21	94.58	94.7
833.769	3.41	3.66	87.05	84.54	4.85	4.57	99.37	99.66	5.8	3.86	99.1	98.96	4.55	4.79	96.35	95.99	3.82	4.01	60.27	55.15	5.28	4.35	99.42	99.55	4.81	5.7	99.45	99.55	4.24	3.7	101.77	102.39	3.49	3.59	94.3	94.89
834.071	4.15	3.94	86.97	84.85	5.47	4.99	98.73	99.53	5.36	4.32	98.85	98.31	4.39	4.27	95.85	96.07	3.78	3.61	60.58	55.05	4.96	4.67	98.88	99.16	5.27	4.26	99.1	98.92	4.5	4	101.37	101.59	4.23	4.91	94.52	94.24
834.374	3.61	3.6	86.99	85.05	5.11	3.29	99.55	99.82	5.22	3.82	99.16	99.04	4.65	4.39	96.71	96.47	2.08	3.51	60.64	55.71	4.9	3.93	99.06	99.27	4.35	4.24	99.56	99.73	3.44	3.44	102.05	102.62	3.87	3.41	94.72	94.48
834.676	4.35	4.06	87.63	85.16	5.17	4.39	98.96	100.02	4.32	4.48	99.65	99.15	4.17	4.97	96.61	96.65	4.3	3.73	61.17	56.12	4.18	4.19	99.4	99.5	4.27	3.9	99.94	99.41	4.44	3.52	102.16	102.46	4.37	4.13	94.55	94.61
834.979	4.55	3.88	87.67	85.19	5.35	5.17	99.56	99.31	5.22	4.68	98.86	98.88	5.71	5.01	96.49	97.05	3.42	4.07	61.61	56.25	5.04	4.07	99.1	99.07	5.29	4.24	99.73	99.3	4.08	3.98	101.83	102.94	4.37	4.23	94.72	94.7
835.281	4.37	4.06	87.64	85.68	4.73	5.57	99.36	100.41	4.82	5.56	99.49	99.04	4.55	5.57	96.85	96.69	4.16	3.83	62.02	56.97	4.62	4.17	99.25	99.67	5.71	4.22	99.97	99.81	4	4.78	102.2	103	4.39	3.99	94.92	95.15
835.583	3.63	4.3	87.23	85.11	4.83	4.47	99.4	100.32	4.9	4.02	99.1	98.92	4.43	4.47	96.66	96.47	4.42	4.17	62.03	57.32	4.64	4.25	99.13	99.43	5.15	3.16	99.83	99.49	4.22	4.44	102.28	102.74	4.67	3.63	94.74	94.57
835.885	4.31	4.62	88.28	85.7	4.61	5.39	99.69	99.92	5.34	4.66	99.56	99.38	4.69	4.73	97.23	97.45	4.08	4.57	62.09	57.49	5.16	4.55	100.01	99.78	5.27	4.2	99.66	99.62	4.94	4.04	102.79	103.33	3.53	3.23	94.95	94.86
836.188	3.55	3.94	87.67	85.23	5.01	4.95	98.95	99.47	5.36	3.92	99.07	99.18	4.27	4.93	96.53	96.51	4.8	4.11	62.19	57.17	4.52	3.89	99.35	98.39	4.29	3.62	98.92	99.18	3.64	4.88	102.26	102.95	4.83	3.69	94.2	93.89
836.49	3.63	3.58	87.15	84.84	5.73	4.41	99.04	99.39	4.12	4.18	99.09	99.33	4.41	4.47	96.07	96.44	3.64	3.51	62.5	57.76	4.3	4.55	98.83	99.29	4.89	3.02	99.3	99.3	3.64	4	101.86	102.32	4.25	3.61	94.4	94.41
836.792	4.91	4.5	87.24	85.16	5.67	6.47	98.95	99.85	6.16	5.74	98.85	98.46	6.29	5.89	96.46	96.63	5.06	5.09	62.79	57.53	5.62	5.63	98.97	99.27	5.87	5.76	99.47	99.13	5.92	4.62	101.65	102.38	4.63	4.85	94.23	94.48
837.094	5.93	5.12	87.76	85.32	5.13	5.71	99.64	99.65	6.02	5.68	98.76	98.74	5.33	5.33	95.81	96.86	4.4	4.91	63.01	58.08	5.16	5.11	99.32	98.96	4.83	5.58	99.63	98.92	6.14	5.58	101.84	101.83	5.43	4.69	94.54	94.46
837.396	4.47	3.48	87.34	85.52	4.05	4.15	98.9	99.84	4.42	4.58	99.1	98.67	4.33	4.03	96.56	96.73	3.92	3.49	63.43	58.34	5.14	3.93	99.2	98.96	4.85	4.94	99.8	99.35	3.66	4.2	102.25	102.64	3.25	4.47	94.07	94.17
837.698	4.43	4.78	87.95	85.73	5.39	4.75	99.19	99.95	5.7	4.92	99.1	98.6	4.49	3.93	96.46	96.75	4.2	3.53	63.23	58.43	3.96	4.79	99.53	99.48	5.21	4.8	99.86	98.71	4.18	4.34	102.32	102.53	4.09	5.41	94.45	94.78
838	4.29	4.76	88.31	85.86	4.59	3.77	99.77	100.13	4.72	4.04	99.24	99.49	4.23	4.81	97.2	96.98	4.18	3.79	64.82	59.12	4.56	3.57	99.78	99.44	4.59	4.48	100.06	99.87	3.8	3.98	102.87	102.99	4.59	3.67	95.09	94.71
838.302	3.81	3.24	87.85	85.41	4.75	4.67	98.99	99.74	4.36	4.24	98.62	98.65	5.09	4.11	96.21	96.73	3.68	2.73	63.75	58.22	4.2	4.07	98.77	98.86	4.19	3.42	99.33	99.61	3.6	3.64	101.88	101.88	4.55	3.33	94	94.74
838.603	3.27	3.7	88.18	86.34	4.45	4.55	99.72	99.99	4.38	3.86	99.43	99.21	4.07	3.83	96.26	97.28	3.14	4.35	65.14	59.38	4.24	3.97	99.79	99.8	4.51	4.4	99.78	99.61	4.2	3.66	102.54	102.8	3.33	3.33	94.42	95.08
838.905	4.01	3.44	87.76	86.11	4.95	5.21	99.22	100.28	4.54	4.42	98.92	99.27	3.89	4.33	96.28	96.4	4.24	3.21	64.51	59.46	3.78	3.93	98.95	99.31	4.51	3.24	99.58	99.6	3.98	4.02	102.38	102.43	4.53	3.89	94.52	94.8
839.207	4.01	4.62	88.53	86.08	5.37	5.75	99.19	99.73	5.14	4.22	99.43	99.42	4.99	4.93	96.73	96.55	4.02	4.27	65.16	59.72	4.96	4.59	99.06	99.32	5.63	4.96	99.55	99.88	3.72	4.44	102.21	102.81	4.73	4.11	94.83	94.68
839.508	5.19	4.94	88.57	86.44	6.67	6.45	99.78	99.99	6.42	5.58	99.39	98.98	6.95	6.11	96.65	96.87	5.7	4.85	65.26	59.42	6.56	5.89	98.83	99.19	5.87	5.14	100	99.42	5.6	5.2	102.19	102.88	5.71	5.79	94.57	94.58
839.81	4.05	4.78	88.48	86.25	5.29	5.69	99.42	99.74	5.28	4.52	99.03	98.58	5.49	4.99	96.27	97.3	3.96	3.49	65.44	59.93	5.62	4.53	99.16	99.71	5.41	4.22	99.76	99.81	4.6	4.4	101.73	102.77	4.93	3.63	94.72	94.84
840.111	3.53	4.08	88.63	86.25	4.79	4.75	99.42	100.11	4.68	4	99.98	98.81	4.43	4.45	96.71	97.25	4.06	3.69	65.61	60.21	4.72	4.71	99.35	99.75	4.19	3.5	99.81	99.82	5.12	3.5	102.07	102.9	2.77	2.85	94.7	94.32
840.413	3.29	4.9	88.11	86.33	5.49	4.97	99.08	100.38	4.86	4.1	98.79	98.68	4.41	4.53	96.6	96.72	4.14	4.01	65.76	60.22	5.2	4.95	99.32	99.48	4.25	4.08	99.56	99.5	4.12	4.68	102.62	102.1	4.09	3.59	94.14	94.17
840.714	4.49	4.14	88.32	86.06	5.83	5.71	99.88	100.15	5.9	4.36	98.62	99.35	4.71	4.53	96.4	97.01	4.24	4.77	66.04	60.78	5.52	4.33	99.17	99.41	5.33	4.28	99.74	99.59	4.68	4.86	102.72	102.01	4.53	3.45	94.72	94.3
841.016	4.07	4.32	88.37	85.52	4.95	4.97	99.14	99.96	5.38	5.32	98.93	98.98	4.39	4.49	96.59	96.46	4.46	3.21	66.14	61.17	4.6	4.69	99.17	99.1	4.87	4.18	99.57	99.57	4.52	4.04	102.06	102.59	3.81	5.01	94.26	94.43
841.317	4.09	3.96	88.31	86.4	5.51	4.49	99.35	100.02	4.22	4.2	99.29	98.67	4.15	4.23	96.64	96.84	3.74	3.95	66.22	61.5	3.54	3.17	99.42	98.73	4.83	4.92	99.78	99.5	4.26	3.4	102.4	102.71	4.07	3.79	94.61	94.39
841.618	4.01	3.96	87.8	85.94	4.61	4.81	98.81	99.33	5.42	3.86	98.94	98.46	4.01	4.83	95.81	96.32	3.58	4.11	66.39	61.36	4.44	4.43	98.77	98.82	5.07	4.34	99.17	98.92	3.72	3.32	101.92	102.11	3.47	4.41	94.08	93.71
841.919	4.73	3.74	88.18	86.63	5.23	5.17	98.76	100.03	4.84	4.5	98.84	98.79	4.85	4.09	95.82	96.94	3.7	4.27	67.1	61.9	4.58	4.71	99.26	99.2	5.61	4.78	99.15	99.82	4.32	3.52	101.89	102.13	4.35	3.83	94.07	94.15
842.22	3.57	4.62	88.36	86.87	4.01	3.77	99.39	100.09	4.44	3.96	99.29	99.37	4.69	4.03	96.83	97.44	3.56	3.25	67.16	62.35	5.16	4.39	99.19	99.42	4.61	4.22	99.69	100.02	4.14	3	102.92	102.49	3.97	3.01	94.46	94.21
842.521	4.09	3.58	88.16	86.1	4.41	4.07	99.03	99.95	5	4.42	98.74	98.9	3.79	4.33	96.26	96.76	3.6	4.43	67.56	62.16	4.9	3.85	99.4	99	3.81	3.3	100	99.45	4.76	3.74	102.28	102.22	4.37	4.07	94.44	94.85
842.823	3.37	4.42	88.31	86.41	4.85	4.21	98.76	99.47	3.92	3.66	98.88	98.35	4.45	4.05	96.29	96.78	2.48	3.31	67.75	62.07	4.52	3.23	98.97	99.16	4.49	4.9	99.2	99.47	4.32	3.82	102.14	102.27	3.55	4.13	94.06	94.64
843.123	4.11	3.08	88.64	86.5	4.39	4.01	99.16	99.43	3.64	3.88	98.95	98.63	4.01	3.99	95.88	96.79	3.38	2.47	68.1	62.77	4.26	3.43	98.6	99.12	4.27	4.4	99.55	98.99	4.04	3.88	101.95	102.47	4.39	3.61	93.87	94.08
843.424	3.51	4.54	89.16	86.95	4.99	4.53	99.76	99.9	4.46	4.22	99	98.33	5.27	4.05	96.83	97.17	3.58	4.09	68.32	63.01	3.86	5.17	99.32	99.79	4.27	4.52	99.42	99.68	4.44	4.2	102.76	102.87	4.13	3.33	95	94.42
843.725	3.59	3.8	88.92	86.45	4.71	4.31	99.12	99.58	5.04	4.14	98.77	99.18	5.03	3.81	96.26	96.56	3.72	3.81	68.44	63.55	3.48	4.77	98.79	99.08	3.89	3.42	99.71	98.98	3.98	4.22	102.41	102.43	3.67	3.95	94.1	94.03
844.026	3.71	4.46	88.43	86.43	4.19	4.19	99.19	99.68	4.64	4.96	99.05	98.28	4.95	3.95	96.28	96.71	3.62	3.43	68.76	63.14	4.12	4.37	99.27	98.71	4.85	3.78	99.48	99.09	3.62	3.48	102.32	102.62	3.75	3.53	94.35	94.18
844.327	3.99	3.58	88.67	87.01	4.15	5.13	99.64	100.3	4.5	4.72	99.63	99.28	4.89	3.53	96.7	97.51	3.82	3.79	68.96	63.38	4.02	3.77	99.01	99.46	5.25	4.26	99.71	99.34	3.96	3.68	101.79	103.04	4.27	3.81	95.08	94.77
844.628	3.35	3.72	88.62	86.77	4.39	4.51	99.16	99.99	4.98	4.48	99.16	99.07	3.93	4.19	96.63	96.64	4.04	3.57	69.19	64.02	4.52	4.03	99.41	99.64	5.33	3.56	99.4	99.38	3.22	3.7	102	102.78	3.47	3.79	94.33	94.32
844.928	3.83	4.22	88.82	86.92	5.71	5.13	99.29	99.2	4.66	4.56	98.2	98.44	5.49	4.51	96.17	96.89	3.66	4.75	69.07	63.44	5.74	4.87	98.72	98.64	5.11	4.64	99.63	99.25	4.92	4.42	101.86	101.89	4.61	4.19	94.18	94.25
845.229	3.85	4.1	89.08	86.81	4.91	4.39	99.72	99.99	4.68	4.34	99.45	98.94	3.89	4.07	96.55	97.3	4.42	3.73	69.84	64.7	4.62	5.01	99.27	99.59	4.97	4.62	99.93	99.19	4.14	4.26	102.96	102.72	3.39	3.77	94.82	94.89
845.529	4.31	3.56	89.47	87.01	4.95	3.79	99.16	99.71	4.66	3.84	98.9	98.43	4.21	3.75	96.13	96.41	4.06	4.21	69.62	64.71	4.26	3.67	99.05	99.24	4.49	3.58	99.46	98.99	4.42	4.1	102.21	102.38	3.27	3.75	93.98	93.91
845.83	3.97	4.48	88.46	86.29	4.95	5.17	98.35	98.96	5.84	5.18	97.99	98.2	4.31	4.35	95.92	96.34	4.32	4.05	69.78	64.57	4.5	4.85	98.04	98.44	4.35	4.14	98.61	98.61	4.02	4.76	101.46	102.09	4.43	4.77	93.67	93.84
846.13	4.71	3.78	89.03	86.92	5.11	5.87	98.66	98.93	5.24	4.32	98.97	98.54	4.25	5.35	96.09	96.56	4.2	4.33	69.38	64.67	4.86	4.21	99.11	98.75	4.25	4.46	99.63	98.69	4.62	4.2	102.26	101.92	4.23	3.61	93.58	94.16
846.431	5.35	5.6	89.54	86.69	6.09	6.43	99.07	99.31	6.46	6.14	99.08	98.66	6.61	6.13	96.59	97.12	6.14	5.03	70.74	64.81	6.64	5.33	99.06	99.69	5.13	5.84	99.68	99.15	5.92	5.24	102.36	103.25	5.81	5.51	94.94	94.62
846.731	5.09	4.76	88.94	86.93	5.53	5.95	98.54	99.07	5.64	5	98.68	98	5.39	4.61	96.02	96.46	3.9	4.61	70.6	65.46	5.5	4.67	99.12	98.81	4.77	4.56	99.47	99.65	4.66	4.4	102.17	102.14	5.45	4.15	94.35	94.1
847.031	4.17	3.72	88.85	86.44	4.33	4.91	98.76	99.96	4.16	4.08	98.4	98.36	5.23	4.03	95.69	96.48	2.44	3.93	70.68	65.17	4.76	4.19	98.94	98.67	4.51	4.58	99.39	98.61	4.02	3.7	101.49	102.28	4.21	4.03	94.32	94.08
847.332	3.77	3.84	89.04	86.92	5.19	4.71	99.01	99.34	4.16	5.28	99.01	99.17	4.87	4.09	95.9	96.44	3.98	3.61	70.93	66.12	3.18	3.95	98.66	99.09	4.19	4.68	99.06	99.74	4.48	2.98	102.02	102.6	3.87	3.63	94.5	93.84
847.632	3.63	4.8	89.08	86.79	4.97	5.61	99.31	100.48	4.54	4.58	98.77	98.91	5.27	4.23	95.99	96.55	4.52	4.21	71.71	66.16	4.52	4.37	99.01	99.2	5.07	3.98	99.56	98.92	3.78	4.38	102.08	102.04	4.17	3.37	94.53	94.17
847.932	4.19	3.86	88.72	86.64	4.01	5.79	98.34	98.9	5.66	5.46	98.47	97.87	4.89	4.73	95.58	96.47	4.26	4.69	70.65	65.63	4.58	3.83	97.85	98.62	4.25	3.84	98.69	99.03	5.18	3.9	101.47	101.18	4.03	4.57	93.01	93.6
848.232	3.93	3.5	89.21	86.51	4.19	4.67	98.89	99.75	4.62	4.14	98.85	98.73	4.57	4.25	96.6	97.04	3.16	3.89	71.71	66.85	5.06	4.21	99.19	99.2	4.77	3.5	99.84	99.44	3.82	4.1	102.62	102.88	4.41	3.41	94.5	94.65
848.532	4.27	3.68	89.18	86.92	4.55	4.89	99.34	99.15	4.78	5.3	98.69	98.47	4.45	4.75	95.94	96.32	3.76	3.81	71.38	66.4	4.12	4.15	99.15	98.92	4.71	4.14	99.25	99.27	4.24	4.04	101.87	102.44	3.97	3.99	94.26	94.21
848.832	3.85	3.56	89.13	87.04	4.45	3.77	98.9	99.46	4.6	2.96	98.49	98.4	3.67	4.45	96.28	95.85	3.76	3.55	71.72	66.56	3.36	3.65	99.25	98.74	3.61	3.72	98.85	99.11	3.22	3.38	102.52	102.27	4.05	2.15	94.2	94.38
849.132	3.57	4.1	89.15	87.83	4.85	4.33	99.36	99.95	3.9	3.96	99.51	98.93	3.47	3.69	96.42	96.79	2.98	4.19	72.27	67	4.32	4.11	99.34	99.45	4.09	4.44	99.67	99.1	3.56	3.78	102.08	102.81	3.47	3.55	94.7	94.44
849.432	3.29	3.5	88.99	87.04	4.41	4.77	98.82	98.78	4.32	4.44	98.87	98.78	4.45	3.73	96.27	96.24	3.46	3.75	72.81	66.9	4.22	4.75	98.71	98.84	3.99	4.6	98.97	98.59	4.26	4.64	101.2	101.79	3.51	3.89	93.7	94.66
849.731	4.73	4.34	89.31	87.84	4.55	4.45	99.89	99.67	5.2	4.3	99.35	99.78	4.27	3.97	97.48	97.21	5.14	4.41	73.09	68.1	4.98	4.33	99.21	99.92	4.81	4.02	100.27	100.07	3.66	4.58	102.83	102.65	4.79	3.85	94.27	95.04
850.031	5.49	4.42	89.87	87.53	5.93	5.63	99.8	100.21	5.74	5.58	99.33	99.11	5.17	5.69	97.15	97.17	4.94	4.61	73.32	68.27	5.28	5.11	98.99	99.82	5.39	4.58	99.63	99.53	4.54	4.52	102.35	103.18	4.69	4.37	95.09	94.31
850.331	4.59	4.56	89.75	87.43	5.03	4.59	99.33	100.17	4.92	3.86	99.13	99.04	4.15	4.27	96.47	96.74	3.28	4.85	73.47	67.41	4.42	4.89	99.21	99.51	4.73	5.1	99.16	99.24	3.9	3.66	102.15	102.75	4.77	3.99	93.95	94.66
850.631	3.47	4.4	89.11	87.12	4.53	4.47	99.12	99.24	4.16	4.08	98.4	97.61	4.83	4.37	96.32	96.79	2.88	3.85	72.99	67.9	4.34	4.03	98.49	98.68	4.07	4.2	99.08	99.3	3.78	3.48	102.15	102.53	3.85	3.87	93.98	93.92
850.93	4.19	3.6	89.71	87.58	5.23	4.37	99.84	100.13	4.86	3.28	98.87	99.29	4.81	4.59	96.92	97.28	3.6	3.41	73.51	68.77	3.78	3.75	99.52	99.8	3.87	4.18	99.91	99.68	3.66	3.28	102.79	102.65	3.83	3.55	94.25	94.55
851.23	3.33	4.04	89.56	87.76	4.45	4.21	99.43	100.17	4.32	4.02	99.52	98.88	4.37	3.97	96.54	96.89	3.32	3.05	73.81	69.1	4.42	3.75	99.02	99.16	4.95	3.96	99.93	99.04	3.26	4.16	102.46	103.09	4.01	3.93	94.68	94.15
851.529	4.29	3.96	89.54	87.42	4.09	4.77	98.92	99.16	4.26	4.02	98.81	98.64	4.63	3.01	95.68	97.13	4.06	3.53	73.53	69.13	3.34	4.45	98.33	98.88	3.79	3.48	99.9	98.76	4.2	3.84	102.2	102.64	4.35	4.37	94.5	94.12
851.829	6.33	7.48	88.98	86.62	6.99	7.91	98.32	99.31	6.78	7.6	98.43	97.84	7.85	7.39	95.42	96.87	7.18	6.43	73.7	68.71	7.56	6.77	98.63	98.72	6.89	6.58	99.21	98.59	6.86	7.04	101.24	101.38	7.11	5.63	93.73	93.76
852.128	4.07	4.04	89.54	86.98	3.93	5.21	98.8	99.5	4.92	3.9	98.39	97.98	4.87	4.39	95.96	96.72	3.7	3.99	73.82	68.92	5.02	4.13	98.82	99.02	5.05	4.18	99.21	99.25	4.74	4.42	101.36	102.06	4.05	3.45	94.14	93.89
852.427	3.93	3.52	89.27	87.32	4.73	4.71	98.48	99.49	4.36	4.44	98.69	98.97	3.99	3.47	96.3	96.38	4.12	4.15	74.34	69.53	4.34	3.77	98.73	98.68	3.83	3.82	99.41	99.17	3.88	3.58	101.6	102.29	3.85	2.75	94.41	94.23
852.726	3.21	3.5	90.17	87.89	3.89	4.15	99.16	100.17	4.02	4.16	99.09	98.96	3.37	4.33	96.85	96.84	4.42	3.37	74.77	69.42	3.62	3.75	99.41	99.77	5.01	3.72	99.9	99.54	3.88	3.62	102.32	103.47	4.33	4.21	94.44	94.27
853.026	4.37	4.6	89.86	88.19	5.81	4.71	99.14	99.47	4.18	4.66	99.5	98.42	4.99	4.71	96.34	96.89	4.2	3.51	75.24	69.7	4.76	4.83	99.1	99.3	4.53	3.76	99.6	99.82	4.24	5.02	102.44	102.37	4.51	3.71	94.62	93.71
853.325	3.41	3.78	89.28	87.07	4.61	5.23	98.16	99.48	4.02	4.22	99.05	97.75	3.91	5.01	95.96	96.84	3.9	4.05	74.1	69.23	4.14	3.81	98.07	98.37	4.65	4.04	99.01	98.61	3.78	4.6	101.94	101.86	4.65	4.87	93.87	93.97
853.624	2.95	3.4	89.99	87.19	4.51	4.39	99.36	99.64	4.66	4.88	98.81	98.57	4.17	4.17	96.28	96.83	3.64	3.73	74.79	70.26	4.32	3.17	98.39	98.84	3.39	4.5	99.29	99.15	3.24	3.2	102.38	102.86	4.05	3.81	94.23	94.29
853.923	4.13	3.94	90.34	87.61	4.03	4.27	99.08	99.68	4.82	3.16	98.83	98.96	4.17	4.37	96.28	96.85	4.44	3.91	75.65	70.33	4.7	3.71	98.58	99.44	4.67	4.88	99.73	99.85	3.8	3.58	103.15	102.82	3.91	3.27	94.46	94.75
854.222	4.39	3.98	89.9	87.63	4.67	4.25	99.35	99.22	4.3	3.78	98.36	98.3	4.47	3.99	96.52	96.99	3.7	3.53	75.87	70.56	3.5	3.81	98.75	99.45	4.33	3.32	99.21	99.74	3.44	3.7	101.96	102.9	3.55	3.23	94.16	94.73
854.521	4.73	4.46	89.92	87.7	5.09	4.41	98.83	99.84	5.12	4.82	99.18	99.21	5.03	4.75	96.73	96.55	4.12	4.03	75.96	70.36	4.24	4.45	99	99.88	4.61	4	99.41	99.62	4.24	4.38	102.49	102.43	4.81	4.75	94.12	94.56
854.82	5.37	5.4	90.61	88.12	6.27	6.01	99.51	99.75	5.5	5.12	99.74	99.64	5.29	5.19	97	97.36	5.44	5.13	76.11	71.17	5.48	5.29	99.62	99.91	4.85	5.78	99.66	99.33	5.54	5	102.55	103.57	5.33	5.21	94.5	95.25
855.119	3.71	3.88	89.5	88.13	3.77	4.11	98.53	99.5	4.36	4.06	98.21	98.43	4.45	3.83	96.4	96.47	4.16	3.05	75.45	71.01	4	4.25	99.27	99.14	3.89	3.38	99.49	98.8	3.42	3.34	102.05	102.49	3.89	3.99	94.25	94.53
855.417	3.29	4.74	89.51	87.68	4.21	4.97	98.89	99.4	4.2	4.04	98.51	98.4	4.53	3.97	96.11	97.13	3.98	3.35	76.54	70.92	4.24	3.43	98.36	98.36	4.01	4.68	99.85	98.5	3.92	3.76	102.63	102.21	3.85	3.93	94.25	94.3
855.716	3.99	3.36	89.69	88.3	4.69	5.01	99.5	100.08	4.46	3.44	99.15	99.19	4.63	4.41	96.2	96.98	4.4	4.11	76.19	71.53	3.68	3.93	98.33	99.48	4.37	3.66	99.33	99.31	3.66	4.3	102.61	102.37	3.97	3.69	94.65	94.42
856.015	3.89	4.12	89.37	87.15	4.55	4.67	98.24	98.84	5.12	3.52	98.48	97.77	5.55	4.87	96.12	96.06	3.04	3.85	76.07	71.33	4.52	4.11	97.79	98.96	4.37	3.54	99.24	98.35	3.76	3.48	101.63	102.26	3.75	3.01	93.56	93.83
856.314	3.83	2.58	90.23	87.8	4.71	4.57	98.94	100.08	4.28	3.92	98.78	98.41	3.79	4.63	96.44	96.4	4.2	4.47	76.92	71.82	4.36	4.99	98.83	99.57	4.57	3.9	99.73	99.21	3.6	3.8	102.64	102.7	3.57	3.35	94.53	94.49
856.612	4.67	4.82	90.03	87.49	4.37	4.11	98.84	99.63	3.86	4.92	98.88	98.77	4.77	5.31	96.18	96.93	3.68	4.15	76.88	72.38	4.24	3.87	98.92	99.32	4.05	4.46	99.86	99.76	4.42	3.98	102.69	102.09	4.49	3.45	94.1	94.37
856.911	4.23	4.86	90.3	87.9	5.77	5.49	99.2	99.48	6.52	5.06	98.29	98.62	4.61	5.01	96.56	96.85	4.48	4.81	76.68	72.45	5.12	4.29	98.16	98.32	5.45	4.96	99.03	99.31	5.44	4.68	102.02	102.41	5.55	4.71	94.46	93.89
857.209	4.19	3.6	89.54	88.3	4.97	5.11	98.58	99.88	4.4	4.76	99.05	98.29	5.69	4.69	95.87	96.71	4.6	5.07	77.03	72.26	5	5.19	97.73	98.75	3.47	3.96	98.75	98.61	4.36	4.04	101.92	102.85	4.45	3.99	94.46	94.17
857.507	3.03	3.42	90.39	88.23	4.37	4.69	98.86	100.24	4.4	4.76	98.86	99.39	4.57	4.07	96.49	96.25	3.88	4.55	77.48	72.01	5.02	3.51	99.03	99.27	4.43	4.16	99.42	99.61	4.04	3.4	102.26	102.54	3.45	3.85	94.44	94.3
857.806	4.37	4.54	90.56	88.26	4.23	5.29	99.67	99.66	4.18	5	99.2	98.94	4.35	3.45	96.85	97.13	4.1	4.71	78.17	72.95	4.1	4.75	99.42	99.63	3.79	4.52	99.81	99.1	4.4	3.92	101.86	103.26	4.57	3.15	94.07	94.86
858.104	4.49	3.66	90.36	87.97	4.79	4.33	100.09	99.9	5.18	4.04	99	98.62	5.17	4.29	96.49	96.57	3.9	4.97	78.33	72.67	4.8	4.31	99.33	99.2	5.11	4.78	99.52	99.21	5.46	3.72	102.66	102.87	4.63	3.77	94.66	94.47
858.402	4.65	3.74	89.96	88.14	4.15	4.37	98.79	99.29	4.44	4.88	98.08	98.31	4.53	3.75	95.36	96.35	4.16	4.19	78.1	72.54	4.28	3.73	98.09	98.97	4.75	3.62	98.56	99.19	4.16	3.76	101.99	102.59	4.53	4.23	94.17	94.46
858.701	7.41	7.48	90.11	88.33	7.73	6.31	98.58	99.63	7.42	6.92	98.47	99.08	8.35	6.83	96.43	96.78	6.1	7.05	77.7	73.49	7.66	6.81	98.86	98.82	7.43	6.54	99.22	99.47	6.68	7.52	102.07	102.13	6.77	7.05	93.79	94.53
858.999	3.45	4.2	90.06	88.5	5.15	4.81	98.73	98.62	4.56	3.92	98.41	98.41	4.61	3.81	95.96	96.51	4.1	3.57	77.8	72.49	3.96	3.77	97.88	98.46	3.83	4	99.38	99.14	4.5	3.28	102.2	102.9	4.43	4.23	93.69	93.97
859.297	3.63	3.86	89.97	88.13	4.03	4.41	98.87	99.53	5.16	3.98	98.86	98.22	4.11	4.67	96.49	97.38	3.78	3.79	78.51	73.34	4.62	3.37	98.59	99.11	4.19	4.12	99.64	99.23	3.48	4.26	102.1	102.84	5.11	4.29	94.1	93.71
859.595	3.61	4.26	89.94	88.28	4.25	4.11	99.24	99.97	4.04	4.44	99.3	98.62	4.01	4.45	96.96	97.16	3.64	4.15	79.78	73.46	3.06	3.23	99.43	99.68	3.87	3.26	99.94	99.58	3.5	3.62	102.16	103.14	2.95	4.15	95.22	94.61
859.893	3.75	4.5	90.04	88.1	4.27	4.83	98.31	99.65	5.08	3.3	98.83	98.29	4.45	4.15	96.33	96.14	4.08	3.21	78.41	73.2	3.54	3.47	98.49	99.25	4.13	3.4	98.75	98.82	3.66	3.24	102.08	102.33	4.17	3.67	93.97	94.49
860.191	3.17	4.5	89.42	87.51	4.47	4.69	97.69	99.2	4.82	4.82	98.28	97.76	5.35	4.25	95.9	96.07	3.86	4.17	78.52	73.31	4.3	3.07	98.46	98.46	5.69	3.7	99.15	98.84	4.12	4.04	102.13	102.18	3.13	3.45	93.49	94.17
860.489	4.09	3.3	90.8	88.13	4.09	4.83	98.81	99.86	4.7	3.74	98.88	98.28	4.07	4.29	96.09	96.72	4.28	4.31	79.01	73.89	4.34	3.79	98.73	99.22	4.53	4.28	99.61	99	5.22	3.78	102.04	102.71	3.63	4.81	94.34	94.93
860.786	4.53	4.56	89.69	88.28	5.43	4.29	98.9	99.43	4.48	3.72	99.16	98.04	5.05	4.19	96.3	97.33	3.98	4.13	79.45	74.34	4.76	4.09	98.57	99.47	4.35	3.84	99.77	99.79	4.42	4.32	102.89	103.03	3.67	3.67	94.14	94.58
861.084	3.57	3.92	90.99	88.26	4.23	4.59	99.03	99.94	4.74	4.34	99.24	99.23	4.09	3.37	96.86	97.3	3.9	3.55	78.74	74.94	3.36	3.55	98.75	99.11	4.25	4.1	100.16	99.66	3.68	5.08	102.16	102.74	3.81	3.87	94.7	95.1
861.382	3.47	3.48	89.22	87.57	4.33	4.51	98.57	98.62	4.28	4.74	98.23	98.61	4.15	4.09	95.89	96.79	3.32	3.41	79.4	74.46	4.88	3.81	98.41	98.57	4.01	4.16	99.28	99.09	3.82	3.9	101.91	101.37	3.47	3.59	94.28	94.19
861.68	4.49	3.64	89.7	87.79	5.05	4.51	99.04	99.3	4.66	4.4	98.24	98.81	4.59	4.69	96.84	96.92	3.26	4.39	79.91	74.91	4.6	4.69	98.85	99.37	4.81	4.5	99.37	99.6	4.24	3.44	101.93	102.75	4.09	4.03	94.92	94.4
861.977	3.71	3.64	89.71	88.19	4.17	4.09	99.04	99.33	4.72	3.34	98	98.42	4.13	4.13	95.84	96.41	3.76	3.89	79.69	74.93	4.4	4.17	98.26	98.96	4.83	3.74	98.48	99.58	3.64	3.54	102.12	102.69	4.71	4.61	93.68	94.67
862.275	3.51	4.36	90.95	88.92	4.51	3.83	99.43	100.08	4.04	3.36	98.8	99.17	4.89	4.07	96.55	96.87	3.82	3.55	80.3	75.03	4.2	4.11	99.11	99.66	5.03	4.48	99.95	99.88	4.62	4.02	102.75	103.22	4.47	3.77	95.29	94.95
862.572	3.89	2.92	89.87	87.95	3.81	4.59	98.53	98.66	4.34	3.72	98.12	97.93	4.23	4.11	96.21	95.96	2.92	3.81	79.97	74.63	3.7	3.55	98.46	99.06	3.61	3.72	98.88	99.03	3.94	3.78	101.87	101.98	3.15	3.51	93.79	94.77
862.87	3.81	4.28	90.27	88.89	3.95	4.79	99.41	99.57	5.78	3.82	99.29	98.75	5.27	4.47	96.61	97.02	4	4.09	80.87	75.65	4.62	3.81	98.91	99.23	4.53	4.54	99.13	99.69	3.04	4.72	102.57	102.9	3.91	4.97	94.6	94.08
863.167	3.79	3.22	90.16	88.05	4.09	3.71	99.38	99.22	3.6	4.26	98.37	97.74	4.21	4.17	95.59	96.32	4	3.27	80.9	75.54	3.72	3.69	98.67	98.13	3.49	4.18	99.2	99.18	3.7	3.56	102.61	102.72	4.87	3.33	94.29	93.82
863.464	4.15	3.22	90.04	88.52	4.49	4.71	99.14	100.02	4.6	3.78	98.46	97.92	4.17	4.51	96.25	96.51	4.4	3.93	80.79	75.66	4.66	3.95	98.9	99.68	4.57	3.86	99	99.75	3.82	4.16	102.05	103.69	4.97	3.47	94.3	94.39
863.762	3.21	3.82	89.97	87.62	3.75	4.45	98.88	99.46	3.92	4.38	98.4	98.53	4.19	3.27	96.09	96.15	4.36	3.29	80.8	75.61	4.02	3.57	99.01	98.62	4.21	2.92	98.75	98.86	3.22	3.24	101.58	101.98	3.71	3.15	95.23	95.01
864.059	4.49	5.74	89.75	88.01	4.79	5.31	98.67	99.1	5.08	5.6	98.74	98.76	5.45	5.17	96.12	96.59	4.2	4.45	80.69	76.3	5.52	4.71	97.83	98.89	5.69	4.76	99.33	99.45	5.32	5.4	101.47	102.49	5.67	4.85	93.72	94.36
864.356	3.69	2.9	91.2	88.99	3.63	4.37	98.98	100.27	3.94	3.82	99.82	99.24	3.73	3.97	97.42	98.29	3.74	4.03	81.72	75.96	4.18	4.47	99.38	100.02	4.21	3.14	100.42	100.22	3.44	3.14	103.53	102.77	3.37	3.75	95.33	94.78
864.653	3.45	4.22	91.19	88.52	4.25	4.45	100.07	100.48	4.36	3.68	98.44	98.68	4.97	4.33	97.25	97.35	4.38	5.15	81.68	76.29	4.84	4.07	99.21	99.89	4.63	4.18	100.15	100.07	3.6	4.14	101.98	103.26	4.95	3.59	94.02	94.72
864.95	3.79	3.7	90.61	88.59	5.29	4.79	99.34	99.71	4.42	3.92	99.84	99.73	4.55	4.51	97.36	96.7	3.48	4.39	81.47	76.05	5.28	3.67	99.37	100.09	4.15	3.92	100.09	99.88	4.06	4.06	102.48	102.6	4.15	3.73	95.05	95.15
865.247	5.01	4.58	90.35	89.18	5.67	4.11	99.5	100.61	4.98	4.18	99.91	99.04	4.29	4.03	97.12	97.3	4.62	3.95	81.83	76.63	4.24	3.71	99.11	99.45	4.49	3.9	99.37	99.27	5.02	4.4	102.22	103.72	3.21	3.97	94.16	94.97
865.544	3.29	2.86	89.39	88.66	3.97	4.37	99.02	99.16	4.06	4.28	98.01	98.74	3.39	4.59	95.39	96.72	4.08	4.59	80.96	76.27	4.34	3.85	98.65	98.6	4.15	4.62	99.09	99.17	3.92	4.1	102.49	102.73	3.63	4.09	93.68	94.63
865.841	3.79	4.16	89.76	87.69	2.99	4.33	97.86	98.96	4.14	5.38	97.34	97.83	3.87	4.05	96.07	95.31	4.38	2.89	80.75	76.57	4.66	3.97	97.54	98.39	4.01	4.16	98.77	98.89	4.26	3.38	102.31	101.78	2.43	3.77	93.85	93.86
866.138	3.83	2.94	89.9	88.37	3.85	3.67	99.45	100.06	4.14	4.46	98.87	99.03	4.21	4.01	96.32	97.1	3.9	4.43	81.1	75.92	4.34	4.43	98.63	99.49	4.23	3.62	99.14	98.9	4.6	3.16	102.66	102.93	4.53	3.51	93.95	93.89
866.435	4.25	3.72	90.77	88.88	4.53	4.41	98.72	99.92	5.48	4.4	99.14	98.66	4.79	4.31	96.71	97.12	4.04	4.29	81.73	77.37	4.34	4.85	99.03	99.65	4.83	4.56	99.36	99.4	3.48	3.78	102.38	102.85	4.41	3.59	94.27	95.22
866.731	3.31	2.72	90.39	88.83	3.73	4.11	98.58	99.05	4.34	4.06	98.7	99.58	3.87	2.87	96.37	97.27	3.74	3.79	82.51	77.31	4.74	4.05	98.59	99.02	4.05	3.68	100.36	98.62	4.16	3.62	102.67	102.72	3.83	2.65	94.05	94.3
867.028	3.59	4.28	91.06	88.45	5.59	4.33	99.44	99.64	4.14	4.86	99.03	99.44	4.51	3.99	95.98	96.65	3.78	4.19	82.4	76.89	4.58	3.59	99.09	99.83	3.63	4.82	100.06	99.92	3.92	3.82	102.28	102.81	4.31	3.87	94.44	94.43
867.325	3.75	2.72	90.25	88.93	4.47	3.39	98.92	100.42	3.52	4.3	98.76	99.62	3.91	4.17	96.95	97.31	3.4	3.79	82.61	77.26	3.54	3.01	99.25	100.09	3.75	3.18	100.47	98.98	4.02	3.78	103.1	103.24	3.85	3.69	95.12	95.13
867.621	3.25	4.46	89.99	88.44	4.73	4.19	97.9	99.2	4.3	4.18	98.22	98.15	4.37	3.71	95.71	96.9	3.88	3.27	82.02	77.16	4.66	4.59	97.96	98.35	5.05	3.06	98.69	99.24	3.3	3.72	101.77	102.26	3.61	3.55	93.97	93.58
867.918	4.23	3.76	90.08	89.48	4.13	4.17	98.63	99.87	4.22	4.5	99.12	98.46	4.53	3.93	96.24	96.54	4.18	3.59	82.35	77.12	4.2	3.99	98.48	98.93	4.91	3.22	98.97	99.42	4.42	3.56	102.47	102.62	3.95	3.95	93.68	94.51
868.214	4.29	3.4	90.21	88.55	4.33	4.21	99.28	99.89	4.72	4.02	98.83	98.68	3.99	3.59	96.02	97.15	4	4.35	83.43	77.42	4.6	4.07	97.8	98.89	4.15	3.4	98.81	99.31	3.52	4.12	102.41	102.79	4.09	3.37	95.02	94.46
868.511	4.17	4.4	89.98	87.66	4.73	4.71	98.77	99.25	4.64	4.78	98.02	97.85	4.25	3.85	95.48	96.28	4.48	4.37	81.95	77.33	4.16	4.05	97.92	98.44	4.65	4.32	98.65	98.46	4.1	4.22	101.76	102.22	3.31	3.59	93.49	93.72
868.807	3.07	3.96	90.53	88.36	4.13	4.49	99.25	100.37	4.78	4.06	97.89	99.7	4.15	4.03	96.95	97.12	4.08	3.31	82.34	78.52	4.12	5.15	98.35	99.75	4.35	3.82	99.5	99.31	3.72	3.38	102.94	102.88	4.15	3.31	94.13	94.23
869.103	3.15	4.16	90.77	88.6	4.45	3.31	99.13	99.84	3.74	3.88	99.84	98.38	3.61	3.43	95.93	97.18	4.3	3.87	83.47	77.93	4.58	4.09	98.57	99.2	3.25	4.4	99.79	99.66	3.84	4.44	102.5	103.03	3.69	3.31	93.9	95.04
869.4	3.33	3.82	90.39	89.29	4.39	4.39	98.94	100.34	4.4	4.52	99.01	98.6	3.29	4.19	96.91	96.68	3.48	3.37	83.91	78.59	3.92	4.41	99.29	100.05	3.57	4	100.12	99.47	4.4	3.22	102.36	103.19	3.25	3.79	94.57	95.14
869.696	4.41	3.68	90.72	88.31	3.75	3.87	98.06	98.96	4.7	4.06	98.85	97.92	4.09	3.93	95.98	96.13	4	4.09	82.71	78.09	3.74	3.67	98.38	99.11	3.69	4.72	99.25	98.75	3.54	3.74	103.03	102.44	3.59	3.41	94.52	94.56
869.992	3.73	3.58	91	88.52	4.29	4.13	98.29	99.85	5.02	4.64	98.6	98.53	3.79	4.11	96.32	96.81	4.5	3.61	83.84	78.51	4.56	4.79	99.15	99.93	4.57	3.14	99.78	100.29	4.66	3.42	103.17	102.92	4.09	3.95	95.05	93.83
870.288	3.95	3.6	89.63	88.26	3.79	4.15	99.17	98.82	4.92	3.7	98.21	98.17	4.25	4.35	95.52	95.45	4.2	4.13	82.65	77.65	4.54	4.15	98.12	97.78	4.43	4.26	98.9	98.13	4.64	3.98	101.62	102.6	4.49	3.91	93.53	93.4
870.584	3.99	4.1	90.54	88.92	4.51	4.97	99.41	99.24	4.36	4.12	97.86	98.79	5.71	4.83	97.19	97.32	4.78	3.03	83.47	79.05	3.42	3.33	98.91	99.19	4.93	4.22	99.79	99.37	4.2	4.02	102.17	102.98	4.15	4.33	94.26	94.86
870.88	3.63	3.2	91.36	89.4	4.11	4.27	99.2	99.96	4.44	3.8	99	99.15	4.11	4.09	96.59	97.54	4.46	3.47	85.03	79.53	4.38	3.43	98.85	99.69	3.61	4.56	99.45	99.33	4.16	3.34	102.94	102.97	4.35	3.81	94.65	95.34
871.176	4.11	4.38	91.43	89.46	4.75	5.01	100.28	100.22	3.82	4.04	100.33	99.33	4.73	3.97	97.58	97.1	5.04	4.29	84.62	79.36	4.58	4.25	99.64	100.29	4.43	4.6	100.29	100.64	4.78	3.76	103.17	103.74	3.99	4.85	94.87	95.26
871.472	4.17	3.58	91.14	89.56	3.99	5.37	99.33	100.17	4.3	4.42	98.94	98.44	3.91	3.97	97.34	97.92	2.98	3.77	83.87	78.54	4.28	3.69	99.72	99.11	4.35	3.04	100.18	100.23	3.56	3.38	103.38	104.13	3.57	4.01	94.85	94.96
871.768	4.53	4.58	90.59	88.91	4.47	5.39	99.79	99.21	5.02	4.44	98.49	99.59	4.59	4.63	97.13	96.98	3.74	4.91	84.74	79.94	4.68	4.11	98.53	100.34	4.67	3.26	99.72	99.41	3.82	3.9	102.82	103	5.17	3.47	94.33	93.81
872.063	3.47	3.24	90.65	88.95	3.63	4.69	98.7	100.14	4.7	4.6	98.42	98.45	4.11	3.59	96.2	97.22	4.26	3.47	84.07	79.04	4.36	4.29	98.33	99.03	3.75	4.14	99.39	99.37	3.76	2.62	102.92	103.14	3.85	3.27	93.96	93.97
872.359	3.93	5.44	91.14	89.45	4.61	4.43	99.1	99.57	5.26	4.66	99.2	98.86	4.31	3.91	96.25	96.37	4.14	3.93	84.31	79.53	4.24	4.63	98.58	99.53	4.15	4	99.62	99.9	4.3	2.96	102.54	103.32	3.89	3.77	94.16	94.27
872.655	4.93	5.68	91.6	89.93	5.21	4.85	99.45	101.04	5.36	4.46	99.26	98.98	6.01	5.39	97.76	96.9	5.62	5.61	84.61	80.19	5.2	5.17	99.75	100.09	5.71	5.42	100.85	101.25	5.58	4.54	103.59	103.85	5.25	5.15	94.04	95.62
872.95	3.87	4.28	90.63	88.47	4.57	5.05	98.23	98.75	3.92	3.84	97.89	98.66	4.21	4.39	96.03	96.41	3.9	4.43	84.49	79.65	4.08	4.15	98.4	98.8	4.85	3.5	99.61	98.91	4.54	3.98	102.73	102.65	4.27	3.83	93.65	93.52
873.246	3.41	3.7	90.64	88.71	5.23	4.19	98.46	99.58	5.36	3.96	99.32	98.26	4.51	4.81	96.03	95.62	3.22	4.29	84.46	79.37	4	3.77	97.74	98.89	4.31	4.9	99.22	99.25	4.44	4.52	101.71	103.23	3.95	3.47	93.33	94.61
873.541	2.99	4.26	90.39	88.96	4.33	3.61	99.06	100.39	5.18	3.96	98.48	98.6	4.21	4.37	97.26	96.99	4.06	4.25	84.27	79.62	3.76	5.55	99.24	100.24	4.45	3.9	100.63	99.12	4.54	4.04	102.76	102.96	4.25	3.63	94.4	95.27
873.837	3.49	2.34	91.07	88.98	3.65	2.73	99.28	99.9	4.24	4.3	99.09	98.67	3.27	3.01	95.66	96.65	3.34	3.59	84.89	80.35	3.6	3.89	98.5	99.31	3.95	4.44	99.3	99.49	3.52	3.56	102.52	102.62	2.97	3.43	93.7	94.42
874.132	4.11	3.42	89.97	88.33	3.41	4.41	98.13	99.37	4.2	4.04	98.67	98.31	3.33	4.11	96.17	96.32	3.92	4.15	84.79	79.36	3.98	4.51	98.23	98.34	3.41	3.94	98.98	98.85	3.56	3.1	101.32	102.08	3.61	4.43	93.83	93.87
874.428	4.99	4.08	91.21	89.07	4.11	3.73	98.67	99.32	4.92	4.34	98.74	98.21	4.39	3.93	95.38	96.84	3.32	4.17	85	79.48	4.08	4.81	98.42	99.09	3.79	3.54	100.21	99.27	3.46	2.96	102.27	102.88	5.01	3.43	93.56	94.7
874.723	4.51	3.72	91.34	89.08	5.03	4.47	100.73	99.18	4.36	4.64	99.49	98.12	3.97	4.31	96.08	97.06	4.36	3.91	85.71	80.76	4.14	5.11	98.77	100.11	4.61	4.5	99.19	100.83	4.08	4.42	102.64	102.98	4.95	3.69	94.27	93.84
